# Supplementary material for: TranscriptomeBrowser: A Powerful and Flexible Toolbox to Explore Productively the Transcriptional Landscape of the Gene Expression Omnibus Database
Source: PLoS One. 2008 Dec 23;3(12):e4001. doi: 10.1371/journal.pone.0004001 (PMC2602602; doi:10.1371/journal.pone.0004001)
Supplement: Table S1 — Informations related to Affymetrix platforms (n = 33) used in the present work. (0.12 MB XLS) [file pone.0004001.s007.xls]

## Sheet: Feuille1
Plateform ID	Plateform Manufacturer	Organism	Number of Probes	Title
GPL91	Affymetrix	Homo sapiens	12651	Affymetrix GeneChip Human Genome U95 Version [1 or 2] Set HG-U95A
GPL92	Affymetrix	Homo sapiens	12620	Affymetrix GeneChip Human Genome U95 Set HG-U95B
GPL93	Affymetrix	Homo sapiens	12646	Affymetrix GeneChip Human Genome U95 Set HG-U95C
GPL570	Affymetrix	Homo sapiens	54681	Affymetrix GeneChip Human Genome U133 Plus 2.0 Array
GPL571	Affymetrix	Homo sapiens	22277	Affymetrix GeneChip Human Genome U133A 2.0 Array
GPL80	Affymetrix	Homo sapiens	7129	Affymetrix GeneChip Human Full Length Array HuGeneFL
GPL97	Affymetrix	Homo sapiens	22645	Affymetrix GeneChip Human Genome U133 Array Set HG-U133B
GPL98	Affymetrix	Homo sapiens	8934	Affymetrix GeneChip Human 35K SubA Array Hu35k-A
GPL99	Affymetrix	Homo sapiens	8924	Affymetrix GeneChip Human 35K SubB Array Hu35k-B
GPL94	Affymetrix	Homo sapiens	12644	Affymetrix GeneChip Human Genome U95 Set HG-U95D
GPL95	Affymetrix	Homo sapiens	12639	Affymetrix GeneChip Human Genome U95 Set HG-U95E
GPL201	Affymetrix	Homo sapiens	8793	Affymetrix GeneChip Human HG-Focus Target Array
GPL101	Affymetrix	Homo sapiens	8928	Affymetrix GeneChip Human 35K SubD Array Hu35k-D
GPL100	Affymetrix	Homo sapiens	17856	Affymetrix GeneChip Human 35K SubC Array Hu35k-C
GPL96	Affymetrix	Homo sapiens	22283	Affymetrix GeneChip Human Genome U133 Array Set HG-U133A
GPL3921	Affymetrix	Homo sapiens	22277	Affymetrix GeneChip HT-HG_U133A Array
GPL75	Affymetrix	Mus musculus	6584	Affymetrix GeneChip Murine 11K SubA Array Mu11K-A
GPL32	Affymetrix	Mus musculus	12654	Affymetrix GeneChip Murine Genome U74A Version 1
GPL339	Affymetrix	Mus musculus	22690	Affymetrix GeneChip Mouse Expression Array 430A and Mouse Genome 430A 2.0 Array
GPL340	Affymetrix	Mus musculus	22575	Affymetrix GeneChip Mouse Expression Array 430B
GPL76	Affymetrix	Mus musculus	6595	Affymetrix GeneChip Murine 11K SubB Array Mu11K-B
GPL1261	Affymetrix	Mus musculus	45101	Affymetrix GeneChip Mouse Genome 430 2.0 Array
GPL5722	Affymetrix	Mus musculus	4019	Affymetrix Mus musculus 4K chromosome 11 and 16 CustomExpress Array
GPL83	Affymetrix	Mus musculus	11934	Affymetrix GeneChip Murine Genome U74 Version 2 Set MG-U74C
GPL82	Affymetrix	Mus musculus	12477	Affymetrix GeneChip Murine Genome U74 Version 2 Set MG-U74B
GPL81	Affymetrix	Mus musculus	12488	Affymetrix GeneChip Murine Genome U74 Version 2 Set MG-U74A
GPL1355	Affymetrix	Rattus norvegicus	31099	Affymetrix GeneChip Rat Genome 230 2.0 Array
GPL342	Affymetrix	Rattus norvegicus	15333	Affymetrix GeneChip Rat Expression Set 230 Array RAE230B
GPL85	Affymetrix	Rattus norvegicus	8799	Affymetrix GeneChip Rat Genome U34 Array Set RG-U34A
GPL341	Affymetrix	Rattus norvegicus	15923	Affymetrix GeneChip Rat Expression Set 230 Array RAE230A
GPL88	Affymetrix	Rattus norvegicus	1322	Affymetrix GeneChip Rat Neurobiology U34 Array RN-U34
GPL86	Affymetrix	Rattus norvegicus	8791	Affymetrix GeneChip Rat Genome U34 Array Set RG-U34B
GPL87	Affymetrix	Rattus norvegicus	8789	Affymetrix GeneChip Rat Genome U34 Array Set RG-U34C
