# Supplementary material for: TranscriptomeBrowser: A Powerful and Flexible Toolbox to Explore Productively the Transcriptional Landscape of the Gene Expression Omnibus Database
Source: PLoS One. 2008 Dec 23;3(12):e4001. doi: 10.1371/journal.pone.0004001 (PMC2602602; doi:10.1371/journal.pone.0004001)
Supplement: Table S2 — Informations related to experiments (n = 1,484) that were analyzed using the DBF-MCL algorithm. All Informations were obtained from the GEO website. (1.38 MB XLS) [file pone.0004001.s008.xls]

## Sheet: Feuille1
ExpID	PubmedID	PlateformID	Nb. Samples	Title
GSE1000	-	GPL96	10	Amino acid conjugated surfaces and controls at 6 and 32 hours
GSE1001	15277499	GPL85	18	Sprague-Dawley rat retina post-injury and control samplesKeywords = GliosisKeywords = CNS injury
GSE1004	12415109	GPL91	24	Molecular profiles of dystophin-deficient patients and normal human skeletal muscles on Affymetrix HG-U95A arraysKeywords = DMDKeywords = Duchenne muscular dystrophyKeywords = dystrophinKeywords = Affymetrix U95A arrayKeywords = skeletal muscleKeywords = gene expression profiles
GSE1007	12698323	GPL92	21	molecular profiles (HG-U95B,C,D,E) of biopsy skeletal muscle samples obtained from 10 normal individuals and 10 DMD patientsKeywords = gene expression profiles of normal human skeletal musclesKeywords = gene expression profiles of DMD patients' skelatal muscle samplesKeywords = Affymetrix HG-U95BKeywords = Affymetrix HG-U95CKeywords = Affymetrix HG-U95DKeywords = Affymetrix HG-U95E
GSE1007	12698323	GPL93	22	molecular profiles (HG-U95B,C,D,E) of biopsy skeletal muscle samples obtained from 10 normal individuals and 10 DMD patientsKeywords = gene expression profiles of normal human skeletal musclesKeywords = gene expression profiles of DMD patients' skelatal muscle samplesKeywords = Affymetrix HG-U95BKeywords = Affymetrix HG-U95CKeywords = Affymetrix HG-U95DKeywords = Affymetrix HG-U95E
GSE1007	12698323	GPL94	22	molecular profiles (HG-U95B,C,D,E) of biopsy skeletal muscle samples obtained from 10 normal individuals and 10 DMD patientsKeywords = gene expression profiles of normal human skeletal musclesKeywords = gene expression profiles of DMD patients' skelatal muscle samplesKeywords = Affymetrix HG-U95BKeywords = Affymetrix HG-U95CKeywords = Affymetrix HG-U95DKeywords = Affymetrix HG-U95E
GSE1007	12698323	GPL95	21	molecular profiles (HG-U95B,C,D,E) of biopsy skeletal muscle samples obtained from 10 normal individuals and 10 DMD patientsKeywords = gene expression profiles of normal human skeletal musclesKeywords = gene expression profiles of DMD patients' skelatal muscle samplesKeywords = Affymetrix HG-U95BKeywords = Affymetrix HG-U95CKeywords = Affymetrix HG-U95DKeywords = Affymetrix HG-U95E
GSE1008	12874102	GPL81	24	Determination of gene expression changes in extraocular muscle of mdx (dystrophin-deficient) mice at postnatal ages 14, 28, 56, and 112 days. 3 independent replicates/age/strain. Data form part of publications: Human Molecular Genetics 12:1813-1821, 2003 and FASEB Journal 17: 893-895, 2003 (on-line full article available at http://www.fasebj.org/cgi/doi/10.1096/fj.02-0810fje).Keywords = microarra…
GSE1010	-	GPL96	24	RNA samples prepared from lymphoblastic cells or cell lines from normal and FCHL (familial combined hyperlipemia) patients
GSE1018	-	GPL81	13	Leg muscle mdx and control: 7,14,23 day
GSE1025	12874102	GPL81	36	Determination of gene expression changes in hindlimb muscle (gastrocnemius/soleus) of mdx (dystrophin-deficient) mice at postnatal ages 7, 14, 23, 28, 56, and 112.
GSE1026	14681298	GPL81	36	Determination of gene expression changes in extraocular muscle of mdx (dystrophin-deficient) mice at postnatal ages 7, 14, 23, 28, 56, and 112 days. 3 independent replicates/age/strain. Data form part of publication: Human Molecular Genetics 13:257-269, 2004.Keywords = microarrayKeywords = muscle
GSE1028	16242039	GPL91	12	B lymphoblast samples from control individual, Scott syndrome patient and Scott syndrome daughter. From each samples one part was treated with A23187 ca2+ ionophore. Treated and non-treated samples were then cultured further. Each sample was then processed in duplicate for hybridization on the microarray
GSE1036	15252187	GPL96	12	K562 cells (duplicate cultures A & B) are treated with 50 micromolar hemin for 0, 6, 12, 24, 48, 72 hours followed by RNA extraction and gene expression profiling on Affymetrix human U133A arrays and analysis by MAS 5.0
GSE1045	15023342	GPL96	12	MDA-MB-231 Breast Cancer Cells expressing either wild-type estrogen receptor or the mutant estrogen recepor L540Q were treated with estradiol for 1 or 2 hours
GSE1049	16291736	GPL340	15	Standard Affymetrix Protocol
GSE1049	16291736	GPL339	15	Standard Affymetrix Protocol
GSE1052	16291736	GPL340	15	Standard Affymetrix ProtocolKeywords = microarrayKeywords = muscle
GSE1052	16291736	GPL339	15	Standard Affymetrix ProtocolKeywords = microarrayKeywords = muscle
GSE1056	15942021	GPL91	18	Comparison between hypoxia (1%O2) and cobalt chloride (100 uM) and deferoxamine (100 uM) and Nickel Chloride (100 uM) in Hep3B cells (human hepatocellular carcinoma cells)Keywords = Hep3BKeywords = hypoxiaKeywords = cobaltKeywords = deferoxamineKeywords = Nickel
GSE1059	15691874	GPL96	18	Human myometrial cells taken from biopsies of pre-menopausal non-cancerous non-pregnant uteri were cultured in complete MEM D-valine medium plus 10% FCS, and stably-transfected with the pcDNA3.1/V5-His TOPO vector (Invitrogen) harbouring either CREB, CREM alpha, CREM tau2alpha, ATF2, ATF2-small gene or a control empty-vector. Total RNA was extracted using TRI-reagent (Sigma) and RNeasy columns (Q…
GSE1062	11572940	GPL32	14	Extraocular Muscle is Defined by a Fundamentally Distinct Gene Expression Profile. Adult mouse extraocular, masticatory, and hindlimb (gastrocnemius/soleus) muscles of adult mice were compared using Affymetrix microarrays. Data form part of publication: Proceedings of the National Academy of Sciences USA 98:12062-12067, 2001.
GSE1074	17200951	GPL1261	12	EXPERIMENT: Microarray expression profiles derived from the cranial neural folds (headfold) of neurulation-stage mouse embryos 3.0h after maternal alcohol exposure on 8 d.p.c.ANIMAL MODEL: Pregnancies from 2 substrains of C57BL/6 mice that differ in relative risk of Fetal Alcohol Syndrome (FAS): C57BL/6J (B6J) high-risk condition, and C57BL/6NCrl (B6N) low-risk condition.EXPOSURE: Dams dosed with…
GSE1085	15141080	GPL81	24	This study was performed to understand what controls the aggressivity of the pancreatic infiltrate during type-I diabetes development. We used the BDC2.5 transgenic mouse model. Samples were obtained at the age of onset of insultis. Depending on their genetic background, mice transgenic for the BDC2.5 T cell receptor present very different forms of insulitis. The NOD genetic background leads to a…
GSE1092	-	GPL81	22	SJL & Balb. Leg and eye; 1 year, 10 months
GSE1093	15039484	GPL81	31	Mice were killed between 24 to 26 months of age, tissues removed, rapidly frozen on dry ice, and stored in liquid nitrogen. Total liver RNA was isolated from frozen tissue as described (T. Tsuchiya, J.M. Dhahbi, X. Cui, P.L. Mote, A. Bartke, S.R. Spindler, Physiological Genomics, Submitted). mRNA levels were measured using the Affymetrix mouse U74Av2 array according to standard protocols. After h…
GSE1095	17298388	GPL85	16	Gene expression in the rat dentate gyrus following passive avoidance training.
GSE1112	15133507	GPL81	12	Four independent chip hybridization with RNAs from four independent RTOC cultures.
GSE1122	15284076	GPL80	15	Gene expression profiling of lung tissue from undiseased (NML), 'usual' emphysema (EML), and Alpha-1 Antitrypsin Deficiency-related emphysema (ADL).Keywords = EmphysemaKeywords = COPDKeywords = Alpha-1 Antitrypsin Deficiency
GSE1123	-	GPL81	18	Confluent C3H10T1/2 cells stimulated to differentiate using IDMB (1uM BRL49653, 1uM Dexamethasone, 0.5uM IBMX, 10ug/mL Insulin). Expression was examined 24 hours after IDMB treatment. Additionally, the effects of addition of TCDD 48 hours prior to IDMB treatment, and EGF addition concurrent with IDMB treatment were examined.Keywords = AdipogenesisKeywords = TCDDKeywords = EGF
GSE1124	-	GPL96	15	We aimed at finding differently expressed genes in whole blood cells of African children with uncomplicated malaria and severe malarial anemia compared one to another and to healthy infants. To accomplish this, we hybridized each of 15 microarrays with pooled cRNA from 4 of 20 control individuals (C), 20 with uncomplicated malaria (U) and 20 with severe malarial anemia (S). The pools were homogen…
GSE1131	15178686	GPL81	15	MC3T3 cells clone 1b were grown in alpha-MEM with 10% fetal calf serum (FCS, Gibco), 1% penicilin/streptomycin (Pen/Strep) and 1% L-Glutamine (L-Glu). For differentiation experiment, cells were seeded on 6 cm dishes (3x105cells/dish in 5 ml medium) and grownt to confluence for 3 days at 37C / 5% CO2. Cells were then stimulated with osteogenic stimulus (10 mM beta-glycerophosphate (GP, Sigma), 50 …
GSE1132	15145801	GPL96	17	An experiment comparing control versus IFN-g treated skin cells (one design factor on two levels). To evaluate the biological and the experimental variability, the following experimental design was planned as shown in Figure 1: ""Control"" and ""IFN-g stimulated"" keratinocytes were cultured in triplicate using three individual petri Ã10 culture dishes and RNA was independently extracted from ea…
GSE1132	15145801	GPL97	17	An experiment comparing control versus IFN-g treated skin cells (one design factor on two levels). To evaluate the biological and the experimental variability, the following experimental design was planned as shown in Figure 1: ""Control"" and ""IFN-g stimulated"" keratinocytes were cultured in triplicate using three individual petri Ã10 culture dishes and RNA was independently extracted from ea…
GSE1133	15075390	GPL96	158	The tissue-specific pattern of mRNA expression can indicate important clues about gene function. High-density oligonucleotide arrays offer the opportunity to examine patterns of gene expression on a genome scale. Toward this end, we have designed custom arrays that interrogate the expression of the vast majority of protein-encoding human and mouse genes and have used them to profile a panel of 79…
GSE1140	15194674	GPL96	15	Analysis of peripheral blood mononuclear cells (PBMCs) separated from whole blood of healthy male subjects- prior to onset of exercise- immediately following the end of exercise and- immediately following 1 hour of recovery from exercise
GSE1145	-	GPL91	17	To establish changes in cardiac transcription profiles brought about by heart failure we collected myocardial samples from patients undergoing cardiac transplantation whose failure arises from different etiologies (e.g. idiopathic dilated cardiomyopathy, ischemic cardiomyopathy, alcoholic cardiomyopathy, valvular cardiomyopathy, and hypertrophic cardiomyopathy) and from ""normal"" organ donors wh…
GSE1145	-	GPL570	90	To establish changes in cardiac transcription profiles brought about by heart failure we collected myocardial samples from patients undergoing cardiac transplantation whose failure arises from different etiologies (e.g. idiopathic dilated cardiomyopathy, ischemic cardiomyopathy, alcoholic cardiomyopathy, valvular cardiomyopathy, and hypertrophic cardiomyopathy) and from ""normal"" organ donors wh…
GSE1147	-	GPL96	23	Sex Specific Transciption in Human Hypothalamus between 7 male biological samples (2 technical replicates of each) and 5 female biological samples (2 technical replicates of 4 of these).Keywords = human hypothalamus, sex-specific transcription
GSE1148	-	GPL339	48	Sex Specific Transciption in Mouse Hypothalamus, Liver, Kidney, Ovary and Testis. For each somatic tissue there are 3 biological samples from different pools comprised of 10 animals for each sex each with a technical replicate. For each of the reproductive tissues there are 3 biological samples from different pools comprised of 10 animals with a technical replicate for each.Keywords = Mouse sex-s…
GSE1153	15033914	GPL91	20	Estrogens exert many important effects in bone, a tissue that contains both estrogen receptors alpha and beta (ERalpha and ERbeta). To compare the actions of these receptors, we generated U2OS human osteosarcoma cells stably expressing ERalpha or ERbeta, at levels comparable to those in osteoblasts, and we characterized their response to estradiol (E2) over time using Affymetrix GeneChip microarr…
GSE1155	-	GPL341	11	The ketogenic diet (KD) is an anticonvulsant treatment that has been used to manage medically-intractable epilepsies. The KD requires 10-12 days to become maximally effective, suggesting that changes in gene expression are involved in its anticonvulsant action. Using the Affymetrix rat arrays (RAE230A), 6 control samples and 5 KD samples were run.
GSE1156	-	GPL85	30	This study aims to investigate age-specific, time-dependent changes in gene expression that may underlie the priming effect of early-life seizures by looking at the sequence of gene expression patterns in the hippocampus at various times following Kainate induced seizures at postnatal day (P) 15.
GSE1157	-	GPL85	15	The cardinal clinical features of Parkinson's disease result from selective loss of midbrain dopaminergic neurons. The goal of this experiment is to determine the gene expression profiles of these neurons by studying untreated rat substantia nigra pars compacta (SNc) and ventral tegmental area (VTA) dopaminergic neurons using laser capture microscopy to obtain region-specific neuronal mRNA.
GSE121	12436343	GPL99	10	Global transcript profiling to identify differentially expressed skeletal muscle genes in insulin resistance, a major risk factor for Type II (non-insulin-dependent) diabetes mellitus. Compared gene expression profiles of skeletal muscle tissues from 18 insulin-sensitive versus 17 insulin-resistant equally obese, non-diabetic Pima Indians.
GSE121	12436343	GPL80	10	Global transcript profiling to identify differentially expressed skeletal muscle genes in insulin resistance, a major risk factor for Type II (non-insulin-dependent) diabetes mellitus. Compared gene expression profiles of skeletal muscle tissues from 18 insulin-sensitive versus 17 insulin-resistant equally obese, non-diabetic Pima Indians.
GSE121	12436343	GPL98	10	Global transcript profiling to identify differentially expressed skeletal muscle genes in insulin resistance, a major risk factor for Type II (non-insulin-dependent) diabetes mellitus. Compared gene expression profiles of skeletal muscle tissues from 18 insulin-sensitive versus 17 insulin-resistant equally obese, non-diabetic Pima Indians.
GSE121	12436343	GPL100	10	Global transcript profiling to identify differentially expressed skeletal muscle genes in insulin resistance, a major risk factor for Type II (non-insulin-dependent) diabetes mellitus. Compared gene expression profiles of skeletal muscle tissues from 18 insulin-sensitive versus 17 insulin-resistant equally obese, non-diabetic Pima Indians.
GSE121	12436343	GPL101	10	Global transcript profiling to identify differentially expressed skeletal muscle genes in insulin resistance, a major risk factor for Type II (non-insulin-dependent) diabetes mellitus. Compared gene expression profiles of skeletal muscle tissues from 18 insulin-sensitive versus 17 insulin-resistant equally obese, non-diabetic Pima Indians.
GSE128	16126734	GPL81	30	Mice were a mixed background between 129/SvEv and C57BL/6.Rp1 knockout mice (Rp1-/-) and wildtype littermates examined.At P7, P10, P14, P18 and P21, mice were sacrificed and retinas removed.Each RNA sample included a pool of neural retinas from 3-4 mice.Retinas were all collected at 1-2 pm.
GSE1281	15138197	GPL81	12	Analyses of six Ts1Cje (Down syndrome) and six normal littermate (2N) mouse brains at postnatal day 0.
GSE1282	15138197	GPL82	12	Analyses of six Ts1Cje (Down syndrome) and six normal littermate (2N) mouse brains at postnatal day 0.
GSE1294	15138197	GPL82	12	Analyses of six Ts1Cje (Down syndrome) and six normal littermate (2N) mouse brains at postnatal day 0.
GSE1294	15138197	GPL81	12	Analyses of six Ts1Cje (Down syndrome) and six normal littermate (2N) mouse brains at postnatal day 0.
GSE1295	15347626	GPL96	24	STRRIDE is an exercise intervention study of different doses and intensities in overweight women and men with the metabolic syndrome. We profiled biopsies from 3 female and 3 male STRRIDE subjects in the âhighâ exercise group (2,200 kCal/wk). Muscle biopsies were profiled at entry (0h), and after 9 months of aerobic training (24 hrs post-last bout, 96 hrs post last bout, and 336h (14 days) de…
GSE1296	15537428	GPL96	24	We used quantitative RNA expression profiling on the Affymetrix U133 human expression array to validate quantitative expression results obtained with the tissue preservative RNALater against snap frozen and fresh tissues as a means of routine tissue collection and temporary storage. By using split samples from a homogenous tissue (uterine myometrium), and including duplicates within each processi…
GSE1297	14769913	GPL96	31	For these data, we analyzed hippocampal gene expression of nine control and 22 AD subjects of varying severity on 31 separate microarrays. We then tested the correlation of each gene's expression with MiniMental Status Examination (MMSE) and neurofibrillary tangle (NFT) scores across all 31 subjects regardless of diagnosis. These tests revealed a major transcriptional response comprising thousand…
GSE13	11779835	GPL75	28	Affymetrix GeneChip derived gene expression profiles of flow sorted murine B cell precursors, ex-vivo isolated, RNA-amplifiedKeywords = RNA amplification, B cell development, oligonucleotide arrays
GSE13	11779835	GPL76	27	Affymetrix GeneChip derived gene expression profiles of flow sorted murine B cell precursors, ex-vivo isolated, RNA-amplifiedKeywords = RNA amplification, B cell development, oligonucleotide arrays
GSE1301	-	GPL339	12	The IL-13 is a central mediator of allergic asthma. This project investigates the mechanisms by which IL-13 elicits the symptoms of asthma.
GSE1301	-	GPL340	12	The IL-13 is a central mediator of allergic asthma. This project investigates the mechanisms by which IL-13 elicits the symptoms of asthma.
GSE1302	15161964	GPL93	15	Primary cultures of human trophoblasts were established from normal, term placenta. Cells were treated five hours after plating. This sample was treated with 1 uM GW7845. RNA was extracted after 48 hours of treatment using Tri-reagent. Each sample was pooled from three individual placentas prior to target generation. Targets were produced using standard Affymetrix procedures from 30ug of total RN…
GSE1302	15161964	GPL94	15	Primary cultures of human trophoblasts were established from normal, term placenta. Cells were treated five hours after plating. This sample was treated with 1 uM GW7845. RNA was extracted after 48 hours of treatment using Tri-reagent. Each sample was pooled from three individual placentas prior to target generation. Targets were produced using standard Affymetrix procedures from 30ug of total RN…
GSE1302	15161964	GPL95	15	Primary cultures of human trophoblasts were established from normal, term placenta. Cells were treated five hours after plating. This sample was treated with 1 uM GW7845. RNA was extracted after 48 hours of treatment using Tri-reagent. Each sample was pooled from three individual placentas prior to target generation. Targets were produced using standard Affymetrix procedures from 30ug of total RN…
GSE1302	15161964	GPL92	15	Primary cultures of human trophoblasts were established from normal, term placenta. Cells were treated five hours after plating. This sample was treated with 1 uM GW7845. RNA was extracted after 48 hours of treatment using Tri-reagent. Each sample was pooled from three individual placentas prior to target generation. Targets were produced using standard Affymetrix procedures from 30ug of total RN…
GSE1302	15161964	GPL91	15	Primary cultures of human trophoblasts were established from normal, term placenta. Cells were treated five hours after plating. This sample was treated with 1 uM GW7845. RNA was extracted after 48 hours of treatment using Tri-reagent. Each sample was pooled from three individual placentas prior to target generation. Targets were produced using standard Affymetrix procedures from 30ug of total RN…
GSE1303	-	GPL339	28	Estrogen rescues the loss of gas exchange units in ovariectomized mice. This project studies the mechanisms of this rescue in ovariectomized mice treated with or without estrogen.
GSE1309	15623568	GPL96	22	This series of microarray experiments monitored the gene expression profiles for monoclonal cell lines (derived from HEK-293 parental cell culture) with high (H1, H15, H24, H36, H39) or low (L3, L28, L29) levels of store-operated Ca2+ entry (SOCE). For selection of clones, HEK-293 cells were loaded with indo-1 and sorted by FACS on the basis of their cyclopiazonic acid (CPA)-stimulated Ca2+ entry…
GSE1318	15105423	GPL91	15	Recombinant adenovirus vectors were used to express wild type or domain swap mutants of A-Myb and c-Myb transcription factors in MCF-7 cells or pimary lung epithelial cells or fibroblasts. The results show that Myb proteins have extreme context specificity and identify sub-domains responsible for the activation of specific sets of target genes.Keywords = Myb proteinsKeywords = oncogenesKeywords =…
GSE1318	15105423	GPL96	10	Recombinant adenovirus vectors were used to express wild type or domain swap mutants of A-Myb and c-Myb transcription factors in MCF-7 cells or pimary lung epithelial cells or fibroblasts. The results show that Myb proteins have extreme context specificity and identify sub-domains responsible for the activation of specific sets of target genes.Keywords = Myb proteinsKeywords = oncogenesKeywords =…
GSE1321	-	GPL81	10	The primary aim of this study was to evaluate the changes in hepatocyte gene expression under short-term hypoxic conditions in wild type and HIF-1a null cultures. To this end, hypoxia treated cultures were subjected to incubation with 1% O2/5% CO2/94% N2 at 37Â° C for eight hours prior to RNA isolation. Duplicate normoxic controls were established from separate animals wherein cultures were untre…
GSE1343	15548831	GPL96	16	#G017 Burn/Trauma Study.This is a Glue Grant Study comparison between gene expression analyses performed in eight trauma/burn subjects using either a buffy coat isolation of whole blood or using the PAXgene system
GSE1357	15713787	GPL85	24	Comparison of time-series gene expression pattern in hippocampus of hypoxia tolerant or sensitive rats. At 12 time-points ({0h, 1h, 3h, 12h, 24h, 48h} x 2) after ischemia operation, microdissected CA1 regions of the two groups were respectively subjected to oligonucleotide-based microarray analysis. MIAME information can be obtained at the web link.Keywords = Rattus norvegicusKeywords = hippocamp…
GSE1358	15496517	GPL81	10	Time course of gene expression in the murine embryonic testis from the time of the indifferent gonad (11.5dpc) to birth (18.5dpc)
GSE1358	15496517	GPL83	10	Time course of gene expression in the murine embryonic testis from the time of the indifferent gonad (11.5dpc) to birth (18.5dpc)
GSE1358	15496517	GPL82	10	Time course of gene expression in the murine embryonic testis from the time of the indifferent gonad (11.5dpc) to birth (18.5dpc)
GSE1359	15496517	GPL83	10	Time course of gene expression in the murine embryonic ovary from the time of the indifferent gonad (11.5dpc) to birth (18.5dpc)
GSE1359	15496517	GPL81	10	Time course of gene expression in the murine embryonic ovary from the time of the indifferent gonad (11.5dpc) to birth (18.5dpc)
GSE1359	15496517	GPL82	10	Time course of gene expression in the murine embryonic ovary from the time of the indifferent gonad (11.5dpc) to birth (18.5dpc)
GSE1363	16869965	GPL81	16	We compared gene expression in T1alpha (-/-) lungs vs wild type at dpc 18.5 when the phenotype is moderate and at term when the phenotype is more severe. Lungs present narrow and irregular alveolar spaces, thicker mesenchyme, reduced number of attenuated type I cells, normal numbers of type II cells and secreted surfactant. At term, but not a dpc 18.5, there is increased proliferation of distal c…
GSE1364	16155929	GPL96	21	This series represents the complete series of the human 293h media depleted storage on agarose / rehydration condition course analysis. Samples include Control, monolayer; Control, monolayer/full recovery, antibiotics; Spheroid, no storage; two week storage/0hr recovery; two week storage/full recovery; four week storage/0hr recovery; six week storage/0hr recovery.Keywords = 293h cellsKeywords = d…
GSE1371	17260206	GPL85	18	A study of rat femoral fracture healing in young (6 weeks old at fracture), adult (26 weeks old at fracture), and old (52 weeks old at fracture) rats. Samples were collected at time of surgery (intact controls) and at 3 days, 1 week, 2 weeks, 4 weeks, and 6 weeks after fracture. Samples were the mid third of the femoral length including the external callus, cortical bone and marrow elements. Frac…
GSE1391	15282163	GPL81	17	Preimplantation mouse embryo development study on Affymetrix U74Av2. Zeng et al Dev Biol (2004) 272:483-496.
GSE1392	15226484	GPL81	24	Whole tissues corresponding to the corpus, jejunum, descending colon and rectum were dissected from each mouse, washed with ice-cold PBS, placed into 2ml of RNA-later and flash-frozen in liquid nitrogen. The corpus was defined as the part of the stomach different from the antrum (distinguished by a difference in colour). The jejunum was defined as the tissue between the first 4 cm and the last 2 …
GSE1397	16420667	GPL96	28	Gene expression was measured in trisomy 21 and trisomy 13 human fetal samples. For TS21, regions assayed were cerebrum, cerebellum, heart, and cerebrum-derived astrocyte cell lines.Keywords = trisomy 21Keywords = Down syndromeKeywords = aneuploidyKeywords = brainKeywords = heartKeywords = trisomy 13
GSE1401	-	GPL85	14	Left lateral lobe liver samples from rats fed Mg++ supplemented diets, standard diets and Mg++ deficient diets.
GSE1402	15150433	GPL91	57	Biotinylated cRNA was synthesized from total RNA (Enzo; Farmingdale, NY) and processed according to the Affymetrix GeneChip Expression Analysis Technical Manual (Affymetrix; Santa Clara, CA). 57 samples: 5 pauciarticular PBMC, 15 polyarticular PBMC, 11 control PMBC, 6 JSpA PBMC, 5 pauciarticular SFMC, 10 polyarticular PBMC, 5 JSpA SFMC classified by course.Keywords = juvenile rheumatoid arthritis…
GSE1413	15156201	GPL339	38	Transgenic (Probasin driven Myr-AKT)or wild-type littermates were treated with RAD001 or placebo and sacrificed at 12 and 48 hours following the beginning of treatmentKeywords = AKT Prostate RAD001 mTOR PIN
GSE1418	15618956	GPL201	14	purified CD34+ cells from bone marrow of imatinib-treated patients were compared to those of healthy donorsKeywords = CMLKeywords = CD34+ cellsKeywords = imatinib
GSE1419	15184501	GPL81	30	Comparison of gene expression between T regulatory and T effector cells isolated from the pancreatic lesion of 3-4 wk old BDC2.5 tg NOD mice
GSE142	12832294	GPL85	14	Comparison of normal adult rat extraocular muscle, cardiac muscle, leg (gastrocnemius-soleus) muscle and smooth muscle (stomach wall). Affymetrix microarray chip RG-U34A was used. MAS version 5 was used to analyze the muscle group differences. Data form part of publication: FASEB Journal 17: 1370-1372, 2003 (full length article available at http://www.fasebj.org/cgi/doi/10.1096/fj.02-1108fje).
GSE1420	15833844	GPL96	24	Samples were obtained from 8 patients with Barrett's associated adenocarcinomas after transhiatal esophagectomy. Samples representative of the normal esophageal epithelium (N), Barrettâs esophagus (B) and esophageal adenocarcinomas (ADC) were obtained from every patient by experienced GI pathologists. RNA were extracted and samples were profiled for detection of genes differentially expressed i…
GSE1427	-	GPL96	99	CD133-positive immature blasts were purified from bone marrow of the patients. Total RNA was extracted by RNeasy mini spin column (Qiagen, Inc).SUBMITTER_CITATION: Yamashita Y, Ohashi J, Hirai Y, Choi YL, Kaneda R, Fujiwara S-i, Arai Y, Akutsu M, Tsutsumi C, Miyazaki Y, Usuki K, Teramura M, Mitani K, Kano Y, O'Neill MC, Urabe A, Tomonaga M, Ozawa K & Mano H. Gene expression profiles of CD133-posi…
GSE1427	-	GPL97	99	CD133-positive immature blasts were purified from bone marrow of the patients. Total RNA was extracted by RNeasy mini spin column (Qiagen, Inc).SUBMITTER_CITATION: Yamashita Y, Ohashi J, Hirai Y, Choi YL, Kaneda R, Fujiwara S-i, Arai Y, Akutsu M, Tsutsumi C, Miyazaki Y, Usuki K, Teramura M, Mitani K, Kano Y, O'Neill MC, Urabe A, Tomonaga M, Ozawa K & Mano H. Gene expression profiles of CD133-posi…
GSE1428	15687482	GPL96	22	This series includes the global gene expression profile of the vastus lateralis muscle for 10 young (19-25 years old) and 12 older (70-80 years old) male subjects.
GSE1431	-	GPL91	88	Human prostate cancer tissues analyses
GSE1432	16163375	GPL96	24	Microglial cells are resident macrophages in the central nervous system (CNS) and play a pivotal role in the innate and adaptive immune responses against microbial infections. The immune functions of microglia are regulated by a milieu of cytokines including interferon (IFN)-gamma. We here performed a series of experiments to acertain the transcriptional profile of human fetal microglial cells at…
GSE1435	15613496	GPL1261	27	Two T7 based methods One round of Amplification (Affymetrix) and Two round of Amplification were compared to two Ribo-SPIA based systems, RiboSPIA and pico Ribo SPIA systems. Data for One Round of amplification , Two round of amplification and RiboSPIA are listed here.All Hybridisation were performed using Affymetrix Mouse 430-2 gene chips. Data were all scaled to 500 and scaling factor average w…
GSE1455	16155929	GPL96	18	This series represents the rehydration series of the human 293h media depleted storage on agarose / rehydration condition course analysis. Samples include Control Monolayer, 0 hr desiccation, 0 hr rehydration, 6 hr rehydration, 24 hr rehydration, and 72 hr rehydration.Keywords = 293h cellsKeywords = desiccationKeywords = rehydrationKeywords = spheroidKeywords = stabilizationKeywords = ambient tem…
GSE1456	16280042	GPL96	159	Tissue material was collected from all breast cancer patients receiving surgery at Karolinska Hospital from 1994-1996. Material was frozen immediatley on dry ice or in liquid nitrogen and stored in -70Â°C freezers. This series contains expression data for n=159 tumors from which RNA could be collected in sufficient amounts and quality for analysis.
GSE1456	16280042	GPL97	159	Tissue material was collected from all breast cancer patients receiving surgery at Karolinska Hospital from 1994-1996. Material was frozen immediatley on dry ice or in liquid nitrogen and stored in -70Â°C freezers. This series contains expression data for n=159 tumors from which RNA could be collected in sufficient amounts and quality for analysis.
GSE1458	15217816	GPL81	11	3T3-L1 cells treated 24 hours with either 0.1% DMSO, 20uM pioglitazone, 1uM rosiglitazone or 20uM troglitazone
GSE1460	15210650	GPL96	15	Subpopulations of human fetal thymocyte and circulating naÃ¯ve T cells were obtained through FACS sorting, including CD3-CD4+CD8- intrathymic T progenitor cells (ITTP), CD3intCD4+CD8+ ""double positive"" thymocytes (DP), CD3highCD4+CD8- ""single positive"" thymocytes (SP4), CD3+CD4+CD8-CD45RA+CD62L+ naÃ¯ve T cells from cord blood (CB4+), and CD3+CD4+CD8-CD45RA+CD62L+ naÃ¯ve T cells from adult blo…
GSE1460	15210650	GPL97	15	Subpopulations of human fetal thymocyte and circulating naÃ¯ve T cells were obtained through FACS sorting, including CD3-CD4+CD8- intrathymic T progenitor cells (ITTP), CD3intCD4+CD8+ ""double positive"" thymocytes (DP), CD3highCD4+CD8- ""single positive"" thymocytes (SP4), CD3+CD4+CD8-CD45RA+CD62L+ naÃ¯ve T cells from cord blood (CB4+), and CD3+CD4+CD8-CD45RA+CD62L+ naÃ¯ve T cells from adult blo…
GSE1462	15728662	GPL96	15	Extremely variable clinic and genetic features characterize Mitochondrial Encephalomyopathy Disorders (MED). Pathogenic mitochondrial DNA (mtDNA) defects can be divided into large-scale rearrangements and single point mutations. Clinical manifestations become evident when a threshold percentage of the total mtDNA is mutated. In some MED, the ""mutant load"" in an affected tissue is directly relat…
GSE1463	16525850	GPL81	18	Comparison by expression profiling of tissue from dKO (utrophin/dystrophin-deficient) and MDX mice at 8 weeks of age. Independent triplicate analyses/strain were done for extraocular, hindlimb, and cardiac muscle.Keywords = microarrayKeywords = extraocular
GSE1466	16909099	GPL96	47	CD4-positive cells purified from peripheral blood of ATL patients.
GSE1466	16909099	GPL97	47	CD4-positive cells purified from peripheral blood of ATL patients.
GSE1469	16207250	GPL91	16	The bacterial type III secretion system (TTSS) is dedicated to directly effect host cell pathways by pathogens. In order to identify the key host responses of the various parts of the TTSS, we utilized expression profiling of a lung pneumocytes cell line, A549, exposed to various isogenic mutant strains of Pseudomonas aeruginosa PAK. We have devised a novel filtering method to isolate the key res…
GSE1471	-	GPL339	12	Determination of gene expression changes in cardiac muscle of mdx (dystrophin-deficient) mice at postnatal ages 8 weeks and 10.5 months. 3 independent replicates/age/strain.
GSE1472	11823445	GPL32	20	Determination of gene expression changes in extraocular and hindlimb (gastrocnemius/soleus) of mdx (dystrophin-deficient) mice at postnatal day 56. 5 independent replicates/muscle group/strain.
GSE1474	-	GPL96	24	14 day old Caco-2 and T84 cells were treated with flagellin, lymphotox beta or TNF alpha, respectively, and their expression profile compared to non-stimulated cells.
GSE1479	-	GPL1261	36	Timed matings were performed using C57BL/6 mice and pregnant females sacrificed starting at embryonic day (E) 10.5, and then in daily intervals until E14.5. Gene expression was be further analyzed at E16.5 and E18.5, to monitor changes in gene expression related to maturation of the heart. At stage 10.5, the rostral and caudal parts of the embryo were removed and the middle part, which includes t…
GSE1482	-	GPL81	30	Neurofibromatosis 1 (NF1) is a genetic, neurocutaneous syndrome caused by a mutation in the gene encoding neurofibromin. Individuals with NF1 develop growths that define the NF1 phenotype, including Lisch nodules, cafe-au-lait spots, and neurofibromas. However, more than 50% of individuals with NF1 have cognitive deficits, such as learning disorders and attention deficit/hyperactive disorder that…
GSE1541	15454581	GPL201	20	Alveolar epithalial cells (A549) were used as a model of pulmonary parenchymal cell activation to quiery gene expression profile of activation with either cyclic stretch (20% elongation), TNF (20 ng/ml), LPS (1 mcg/ml) or TNF+STRETCH at both 1 and 4 hrs.
GSE1542	16053509	GPL96	49	RNA was purified from pancreatic ductal cells, and was subjected to microarray experiments with HGU133 A&B arrays.
GSE1542	16053509	GPL97	49	RNA was purified from pancreatic ductal cells, and was subjected to microarray experiments with HGU133 A&B arrays.
GSE1551	15852401	GPL96	23	muscle biopsies of normal and dermatomyositis patients
GSE1552	15311277	GPL81	10	Microarray analysis was designed to study the effect of PIAS1 on interferon (IFN) signaling pathway by comparing the gene activation profiles of wild type and Pias1 null cells in response to IFN treatments. Microarray analysis was performed essentially following the manufacturerâs instructions (Affymetrix). Briefly, bone marrow-derived macrophages (BMMs) from wile type or Pias1 null littermates…
GSE1559	15459755	GPL81	16	HSC (Sca+ SP) were isolated from 8-12 week C57B6 mice at various time points after treatment with 5-Fluorouracil. RNA was isolated from 50,000-100,000 FACS sorted cells and subjected to two rounds of T7 based linear amplification using Ambion's Message Amp kit. Two replicates from each time point were analyzed.http://www.plosbiology.org/plosonline/?request=get-document&doi=10.1371%2Fjournal.pbio.…
GSE1561	15897907	GPL96	49	EORTC 10994 is a phase III clinical trial comparing FEC with ET in patients with large operable, locally advanced or inflammatory breast cancer (www.eortc.be). Frozen biopsies were taken at randomisation. RNA was extracted from 100um thickness of 14G core needle biopsies. Adjacent sections were tested by H&E to confirm >20% tumour cell content. 100 ng total RNA per chip were amplified using the A…
GSE1563	15307835	GPL91	62	We used DNA microarrays (HG-U95Av2 GeneChips) to determine gene expression profiles for kidney biopsies and peripheral blood lymphocytes (PBLs) in transplant patients. Sample classes include kidney biopsies and PBLs from patients with 1) healthy normal donor kidneys, 2) well-functioning transplants with no clinical evidence of rejection, 3) kidneys undergoing acute rejection, and 4) transplants w…
GSE1567	15447939	GPL85	11	Comparison of rat freshly-isolated alveolar epithelial type I cells, freshly-isolated type II cells, and type II cells cultured for 7 daysKeywords = rat, alveolar epithelial type I cells, cultured type II cells
GSE1571	-	GPL81	20	This study identified gene expression of Side Population (SP) and Main Population (MP) cells, isolated from adult murine skeletal muscle and Bone Marrow. Five different preparations of muscle SP, muscle MP, Bone marrw SP and Bone marrow MP cells were used as replicates.SUBMITTER_CITATION: Liadaki K, Kho AT, Sanoudou D, Schienda J, Flint A, Beggs AH, Kohane IS, Kunkel LM. Side population cells iso…
GSE1572	15190254	GPL91	30	Transcriptional profiling of the human frontal cortex from individuals ranging from 26 to 106 years of age. The postmortem brain tissue samples used in this study were neuropathologically normal for age, and were derived from non-demented individuals.
GSE1577	16358311	GPL96	29	T-cell acute lymphoblastic leukemia (T-ALL) and T-cell lymphoblastic lymphoma (T-LL) and are often thought to represent a spectrum of a single disease. The malignant cells in T-ALL and T-LL are morphologically indistinguishable, and they share the expression of common cell surface antigens and cytogenetic characteristics. However, despite these similarities, differences in the predominant sites o…
GSE1579	15992546	GPL339	16	Expression of deltaNB-cateninER allows the time and duration of B-catenin activation to be controlled precisely through the application of 4OHT. We have shown that B-catenin activation in adult mouse epidermis stimulates de novo hair follicles and the formation of a new bulge and melanocyte niche. We utilize Affymetrix Mouse Genome 430A 2.0 oligonucleotide arrays to investigate the differential r…
GSE1588	15466718	GPL81	27	This series represents murine dorsal neural tube bisected along the midline with one half from each embryo used for control and the other half treated with 10-6M RA dissolved in ethanol for 6, 12, 24 or 48 h. For 6 h exposures, the explants were cultured overnight on fibronectin coated 35mm dishes (Biocoat, Becton Dickinson Labware, Bedford, MA) in DMEM with 10% horse serum in order to allow for …
GSE1589	15520459	GPL341	12	A rat insulinoma cell line (INS-1) was generated that contains a FRT site for FLP recombinase mediated site specific integration of specific genes. In addition, the line contains the tetracycline repressor allowing tetracycline (tet) induction of the introduced gene. By comparing the gene expression profiles of uninduced and tet-induced cells, target genes of introduced transcription factors HNF1…
GSE1590	15520459	GPL341	12	A rat insulinoma cell line (INS-1) was generated that contains a FRT site for FLP recombinase mediated site specific integration of specific genes. In addition, the line contains the tetracycline repressor allowing tetracycline (tet) induction of the introduced gene. By comparing the gene expression profiles of uninduced and tet-induced cells, target genes of introduced transcription factors HNF1…
GSE1600	16214324	GPL85	14	Analysis of livers from 74-day old male rats fed vitamin A sufficient or vitamin A deficient diet for 53 days. Either 10ug or 2ug of total RNA used in standard Affymetrix protocolKeywords = ratKeywords = liverKeywords = vitamin A deficiency
GSE1606	15908953	GPL81	10	Whole brain gene expression was examined in the following strains of mice:1. P0 maternal monosomic 39,Xm females, C57BL/6J x C3H/Paf2. P0 paternal monosomic 39, Xp females, In(X)/C3H x C57BL/6J3. P0 normal 40,XX females, In(X)/C3H x C57BL/6J4. P0 normal 40,XX females, C57BL/6J x C3H/PafKeywords = imprintingKeywords = mammalian geneticsKeywords = X-linkedKeywords = brain
GSE1611	16417572	GPL81	12	Transcriptome analysis of Ts1Cje (mouse model of Down syndrome) and euploids murine cerebellum during postnatal developmentKeywords = Down syndromeKeywords = Chromosome 21Keywords = TranscriptomeKeywords = MicroarrayKeywords = CerebellumKeywords = Development
GSE1614	12644633	GPL91	12	This is an analysis of Caco-2 BBe cell spontaneous differentiation. JF2dR1-JF2dR4 = proliferating cells; JF8dR1-JF8dR4 = 4 d post-confluent; JF15dR1-JF15dR4 = 11 d pc, differentiated
GSE1615	15598877	GPL97	13	Polycystic ovary syndrome (PCOS) is a common endocrine and metabolic disorder that affects 5-10% of reproductive aged women. The hallmark characteristic of PCOS is increased ovarian androgen synthesis. Previous studies by our laboratory demonstrated that increased androgen synthesis is a stable biochemical phenotype of PCOS theca cells which are the primary source of ovarian androgen production. …
GSE1615	15598877	GPL96	13	Polycystic ovary syndrome (PCOS) is a common endocrine and metabolic disorder that affects 5-10% of reproductive aged women. The hallmark characteristic of PCOS is increased ovarian androgen synthesis. Previous studies by our laboratory demonstrated that increased androgen synthesis is a stable biochemical phenotype of PCOS theca cells which are the primary source of ovarian androgen production. …
GSE1616	15494475	GPL85	30	Isolated perfused rat hearts exposed to isoflurane or ischemic preconditioning, a subgroup followed by 40 minutes of ischemia and 3 hours of reperfusion. Exact protocol available from the authors.Keywords = preconditioningKeywords = anestheticsKeywords = ischemia/reperfusion
GSE1621	15292486	GPL81	26	Microarray analysis of gene expression after transverse aortic constriction in mice: comparison of TAC vs. sham group at 48 hours, 10 days, and 3 weeks.
GSE1638	-	GPL96	10	Affymetrix Human GeneChips are used to profile gene expression of bovine tissues and embryos to identify uniquely expressed genes in bovine in-vitro fertilized embryos by comparing with seven bovine adult tissues through gene clustering
GSE1643	16498083	GPL570	40	Peripheral sections of upper and lower lung from 18 human multi-organ donors without evidence of lung disease.Keywords = Lung Pulmonary
GSE1648	-	GPL96	11	Human intervertebral disc tissue was obtained from patients (average age 51 yrs) undergoing surgery for lumbar interbody fusion (n=3) or lumbar disc herniation (n=1). Cells were isolated by sequential pronase-collagenase digestion [3]. Cells were passaged twice in monolayer and suspended at a density of 2 x 106 cells/ml in 1.2% alginate (low viscosity, Sigma Chemical, St Louis, MO) dissolved in 1…
GSE1650	15374838	GPL96	30	Comparison of severely emphysematous tissue removed at lung volume reduction surgery to that of normal or mildly emphysematous lung tissue resected from smokers with nodules suspicious for lung cancer.Data obtained from the 18 patients with severe emphysema and 12 patients with mild/no emphysema.Research may provide insights into the pathogenetic mechanisms involved in chronic obstructive pulmona…
GSE1654	15769907	GPL85	27	To determine whether immortalized cells derived from the rat SCN (SCN 2.2) retain intrinsic rhythm-generating properties characteristic of the SCN, oscillatory properties of the SCN2.2 transcriptome were analyzed and compared to those found in the rat SCN in vivo using rat U34A Affymetrix GeneChips. SCN2.2 cells were expanded in 6-well plates. At 6-hour interval across 2 circadian cycles, cells f…
GSE1657	16985259	GPL96	24	Fat tissue was resected during gastric bypass surgery for management of obesity. All subjects had fasted at least 10 hours before surgery. Subjects with malignancies were excluded. No subjects were taking thiazolidinediones or steroids. None had fasting plasma glucose levels over 120 mg/ dl. One half to 10 g of abdominal subcutaneous (external to the fascia superficialis), mesenteric, and greater…
GSE1657	16985259	GPL97	18	Fat tissue was resected during gastric bypass surgery for management of obesity. All subjects had fasted at least 10 hours before surgery. Subjects with malignancies were excluded. No subjects were taking thiazolidinediones or steroids. None had fasting plasma glucose levels over 120 mg/ dl. One half to 10 g of abdominal subcutaneous (external to the fascia superficialis), mesenteric, and greater…
GSE1659	17003243	GPL81	12	Experiment protocol:Experiment was performed on 10 to 15 weeks old male NMRI mice (Harlan, Holland) housed in standard conditions (temperature 22Â°C, humidity 60 Â± 10 %, artificial light from 8.00 am to 8.00 pm, normally 5 animals per cage). Animals had free access to tap water and food pellets (R36, Labfor, Stockholm, Sweden). Animals were randomly divided into healthy and diabetic groups. The …
GSE1673	15769907	GPL85	18	To determine whether immortalized cells derived from the rat SCN (SCN 2.2) retain intrinsic rhythm-generating properties characteristic of the SCN, oscillatory properties of the SCN2.2 transcriptome were analyzed and compared to those found in the rat SCN in vivo using rat U34A Affymetrix GeneChips. In this comparison, adult male Long-Evans rats (175-200g; N=45) were housed under a standard 12h l…
GSE1676	15892871	GPL201	30	Response to treatment with the radiomimetic drug NCS in cells knocked-down for ATM, p53, and the Rel_A subunit of NFkB; and in control un-infected cells and cells infected with siRNA against LacZKeywords = DNA damageKeywords = ATMKeywords = p53Keywords = RelA
GSE1682	16309724	GPL96	12	Total RNA was isolated from candoxin-treated (n = 3 flasks of each time points - 12hrs, 24hrs and 48hrs) and untreated control (n = 3) cells using RNeasyÂ® mini kit.The preparation and processing of labeled, fragmented cRNA for oligonucleotide mcroarray hybridization has been performed according to the manufacturerâs protocols described in the technical manual (Affymetrix, Santa Clara, CA).
GSE1685	16424807	GPL85	19	This is a study of femoral fracture healing in female rats 16 weeks old at fracture to compare intramedullary nailing, screw and plate fixation, and sham surgery. The sham surgery group received a surgical exposure of the femur, but no fracture, no plate, and no nail. Samples were collected at 1 day, 3 days, 1 week, 2 weeks, 4 weeks, and 6 weeks after surgery. Each sample is a pool of RNA from th…
GSE1709	16210397	GPL201	12	Peripheral blood leukocytes of three human donors (Donors 2, 4, and 5) were isolated from blood bank buffy-coat preparations by Ficoll-Hypaque density gradient centrifugation, and T-cells were purified with high affinity negative selection human CD3+ T-cell enrichment columns. The cells were resuspended in RPMI-1640 with 10% FCS with approximately 3-8 millions cells/mL at room temperature overnig…
GSE1719	-	GPL91	36	Age-related macular degeneration has a strong epidemiological association with cardiovascular disease. One pathogenic hypothesis that applies to both diseases is the concept of an abnormal cellular response to injury resulting in a disease phenotype. It has been hypothesized that this phenotype is also present in dermal fibroblasts. This study tests this hypothesis by examination of the expressio…
GSE1721	15985454	GPL341	53	Summary: To identify distinct temporal patterns of mRNA expression in the kidney of rats following a bolus dose of the corticosteroid methylprednisolone.Hypothesis: That prednisone pharmacodynamics can be derived from expression profiling data.
GSE1721	15985454	GPL85	10	Summary: To identify distinct temporal patterns of mRNA expression in the kidney of rats following a bolus dose of the corticosteroid methylprednisolone.Hypothesis: That prednisone pharmacodynamics can be derived from expression profiling data.
GSE1722	-	GPL96	12	Both spotted long oligonucleotide arrays (GPL1384) and Affymetrix GeneChip arrays (GPL96) were used to analyze gene expression in six human head and neck squamous cell carinoma samples versus control samples or lymph node metastases of the same patients. Hybridizations of HG-U133A GeneChip arrays were performed using standard Affymetrix protocols and equipment. Before hybridization on DKFZ Operon…
GSE1724	-	GPL91	18	The response to a 4 hour treatment with TGFbeta (4 ng/ml) was evaluated in lung fibroblasts derived from three controls (normal periphery of resected tumor), open lung biopsies from three patients with idiopathic pulmonary fibrosis (usual interstitial pneumonia pattern on biopsy) and from three patients with fibrosing alveolitis associated with systemic sclerosis (fibrotic non specific interstiti…
GSE1725	15096622	GPL91	171	Peripheral blood lymphocytes from a total of 57 patients were immortalized with Epstein-Barr virus. Fourteen radiation-therapy patients suffered unusual levels of radiation toxicity (RadS). Thirteen radiation-therapy patients with limited toxicity (RadC) were enrolled as controls. Fifteen patients diagnosed with skin cancer before age 40 (SkCa) were used as a second group of controls. Fifteen hea…
GSE1729	15674361	GPL96	43	Gene expression profile of acute myeloid leukemia.Bone marrow (BM) samples from 43 adult patients with newly de novo diagnosed AML.All samples contained more than 80% blast cells.Total RNA was extracted using Trizol reagent (Life Technologies, Gaithersburg, MD) and purified with RNeasy Mini Kit (Quiagen, Valencia, CA). The RNA integrity was assessed using Agilent 2100 Bioanalyzer (Agilent, Palo A…
GSE1739	15655079	GPL201	14	4 controls and 10 SARS samples
GSE1740	15467722	GPL91	12	Type I IFN-inducible gene expression in human blood monocytes primed with Type II IFN.
GSE1743	15476476	GPL96	41	Background: Despite significant improvements in short-term kidney transplant survival, comparable increases in 5 and 10-year outcomes have not been achieved. Chronic allograft nephropathy (CAN) is a major cause of late graft loss. Toxic nephropathy and inadequate long-term immunosuppression are possible factors. We performed a randomized prospective trial comparing calcineurin inhibitor (CNI)-fre…
GSE1744	15282163	GPL339	20	Preimplantation mouse embryo development study on Affymetrix MOE430A. Zeng et al (2004) Dev Biol 272:483-496.
GSE1745	15282163	GPL340	20	Preimplantation mouse embryo development on Affymetrix MOE430B. Zeng et al (2004) Dev Biol 272:483-496.
GSE1746	-	GPL80	10	Comparison of gene expression in CD14 cells from peripheral blood and G-CSF-mobilized peripheral blood to investigate why the latter may be beneficial for allogeneic transplant recipients.Samples from 2-3 donors were pooled for each sample. All cells were freshly isolated after ficoll separation of mononuclear cells.Keywords = CD14, monocyte, PBMC, GPBMC, peripheral blood
GSE1749	15282163	GPL340	20	Studies using low-resolution methods to assess gene expression during preimplantation mouse development indicate that changes in gene expression either precede or occur concomitantly with the major morphological transitions, that is, conversion of the oocyte to totipotent 2-cell blastomeres, compaction, and blastocyst formation. Using microarrays, we characterized global changes in gene expressio…
GSE1749	15282163	GPL339	20	Studies using low-resolution methods to assess gene expression during preimplantation mouse development indicate that changes in gene expression either precede or occur concomitantly with the major morphological transitions, that is, conversion of the oocyte to totipotent 2-cell blastomeres, compaction, and blastocyst formation. Using microarrays, we characterized global changes in gene expressio…
GSE1749	15282163	GPL81	17	Studies using low-resolution methods to assess gene expression during preimplantation mouse development indicate that changes in gene expression either precede or occur concomitantly with the major morphological transitions, that is, conversion of the oocyte to totipotent 2-cell blastomeres, compaction, and blastocyst formation. Using microarrays, we characterized global changes in gene expressio…
GSE1751	16043692	GPL96	31	Affymetrix U133A expression levels for 12 symptomatic and 5 presymptomatic Huntington's disease patients versus 14 healthy controls.
GSE1779	16632822	GPL341	29	Fear conditioning in rats leads to long term memory (LTM) formation. A central neural substrate for LTM is the basolateral amygdala. We sought the expression changes specific to LTM at 6h following anesthesia with isoflurane (a general anesthetic and an effective amnestic agent), following pain (a component of conditioning), and following conditioning in presence and absence of isoflurane.Keyword…
GSE1782	15102909	GPL81	64	Consolidation of long-term memory (LTM) is a complex process requiring synthesis of new mRNAs and proteins. Many studies have characterized the requirement for de novo mRNA and protein synthesis; however, few studies have comprehensively identified genes regulated during LTM consolidation. We show that consolidation of long-term contextual memory in the hippocampus triggers altered expression of …
GSE1786	16260967	GPL96	24	Needle biopsies were obtained from the vastus lateralis muscle of 6 healthy, sedentary, 67Â±2.5 year-old males before and after 3 months of training.
GSE1789	17683628	GPL96	15	Expression profiles in normal and Down syndrome fetal heart explants.
GSE1791	15585845	GPL81	31	Effects of Neuromedin-U on gene expression in mouse D10.G4.1 T-cells natively expressing the GPCR Axor13
GSE1795	16033863	GPL85	12	We used high density oligonucleotide arrays to measure the relative expression levels of ~27,000 probe sets in the left ventricles of inbred rat strains; DA (high performing), Copenhagen (COP, low performing), as well as F1(COPxDA) rats bred from these two strains whose performance was intermediate relative to both parental strains. DA and COP rats differ for both intrinsic aerobic running capaci…
GSE1795	16033863	GPL86	12	We used high density oligonucleotide arrays to measure the relative expression levels of ~27,000 probe sets in the left ventricles of inbred rat strains; DA (high performing), Copenhagen (COP, low performing), as well as F1(COPxDA) rats bred from these two strains whose performance was intermediate relative to both parental strains. DA and COP rats differ for both intrinsic aerobic running capaci…
GSE1795	16033863	GPL87	12	We used high density oligonucleotide arrays to measure the relative expression levels of ~27,000 probe sets in the left ventricles of inbred rat strains; DA (high performing), Copenhagen (COP, low performing), as well as F1(COPxDA) rats bred from these two strains whose performance was intermediate relative to both parental strains. DA and COP rats differ for both intrinsic aerobic running capaci…
GSE1800	-	GPL81	16	Summary:We build a model for the molecular and cellular events underlying phenotypic discordance in glycine receptor defects (beta subunit). Some mice progress and die, while their littermates recover and get better, despite the same mutation on an inbred genetic background. We find evidence for glycine neurotransmitter toxicity and loss of glycinergic interneurons early in the disease, but some …
GSE1801	16682618	GPL96	23	Robust human-goat chimerism was achieved by transplanting human CD34+Lin- cord blood cells into fetal goats. We observed a broad distribution of GFP-marked human cells in non-hematopoietic organs including kidney, muscle, lung, and heart of transplant goats. Various marker techniques indicated that human genes were expressed in chimeric livers and blood.
GSE1802	15477587	GPL96	11	TGFbeta regulated genes in human umbilical cord blood CD34+ cells
GSE1806	-	GPL1261	22	Expression profiling of 8 skeletal muscles from adult C57BL mice. Extraocular, temporalis, anterior digastric, sternocleidomastoid, triceps, diaphragm, quadraceps femoris (vastus lateralis), and tibialis anterior were evaluated using Affymetrix 430 v.2 arrays.
GSE1815	15985639	GPL91	36	RNA from cultured human bronchial epithelial cells treated for 8 hours or for 24 hours with medium alone, interferon gamma, dexamethasone or both interferon gamma and dexamethasone.Keywords = interferon gammaKeywords = dexamethasoneKeywords = human bronchial epithelial cells
GSE1816	-	GPL339	24	These are two time-series of affymetrix MOE430A microarrays of mouse retina ranging from 7 to 12 days. The two conditions are normoxia and hyperoxia
GSE1819	15289156	GPL81	21	Immature (19/20 days of age) Alpk:APfCD-1 mice were treated with arachis oil (AO) vehicle, 0.4mg/kg 17beta-estradiol (E2), or 250mg/kg genistein (GEN), via a single subcutaneous injection, and sacrificed at 1hr, 2hr, 4hr, 8hr, 24hr, 48hr, 72hr post dose.
GSE1825	15548687	GPL96	10	Comparison of gene expression profiles between neuroblastoma samples and Ewing family tumor samples. RNA from native tumor samples was processed for DNA-microarray analysis using Affymetrix HG-U133A microarrays. Primary image analysis was performed using MAS 5.0 and data were scaled to an target intesity of 500.
GSE1829	-	GPL341	11	Epilepsy affects between 1-2% of people worldwide and is defined symptomatically by the appearance of spontaneous, recurrent seizures. The ketogenic diet (KD) is an anticonvulsant treatment that has been used to manage medically-intractable epilepsies. Both clinical and experimental reports show that the KD can be used to treat a variety of seizure types. During KD treatment, ketone bodies, rathe…
GSE1831	15800381	GPL85	30	Early childhood convulsions have been correlated with hippocampal neuron loss in patients with intractable temporal lobe epilepsy. Using a ""two-hit"" rat seizure model, we have shown that animals subjected to kainate (KA)- or hypoxia-induced seizures during early postnatal period showed no cell death, yet sustained more extensive neuronal death after second seizures in adulthood. An early life s…
GSE1832	14519196	GPL91	15	Four healthy human volunteers underwent an acute bout of resistance exercise with the right leg at 2 pm. Biopsies were removed from the Vastus Lateralis muscle 6 h (8 pm) and 18 h (8 am) after exericiseKeywords = Human skeletal muscleKeywords = resistance exeriseKeywords = diurnalKeywords = circadian
GSE1833	16417873	GPL341	12	Neuropsychiatric consequences of poorly controlled seizures that begin in childhood can be devastating. School failure or behavioral difficulty in a child with epilepsy is common and can become the focus of concern for families. Current antiepileptic drugs compound problems with their CNS side effects; effective therapy is currently limited as little is known about the cellular and molecular chan…
GSE1834	15800381	GPL85	30	Mesial temporal lobe epilepsy (MTLE) is the most common medically refractory epilepsy syndrome; kainic acid (KA) induced seizures have been studied as a MTLE model as limbic seizures produced by systemic injections of KA result in a distinctive pattern of neurodegeneration in the hippocampus that resembles human hippocampal sclerosis. In our ""2-hit"" seizure model, animals subjected to seizures …
GSE1837	-	GPL85	15	The cardinal clinical features of Parkinson's disease (PD) (rigidity, rest tremor, bradykinesia, and postural instability) result from selective loss of midbrain dopaminergic neurons. More specifically, dopaminergic neurons in the substantia nigra pars compacta (SNc) are much more susceptible to damage than the adjacent dopaminergic neurons in the ventral tegmental area (VTA). This dichotomy is n…
GSE1839	15289156	GPL81	12	Three independent replicates of 4 groups of immature (19/20 days of age) Alpk:APfCD-1 mice were treated with arachis oil (AO) vehicle, 2.5ug/kg 17beta-estradiol (E2), 2ug/kg diethylstilbestrol (DES), or 50mg/kg genistein (GEN), via 3 daily subcutaneous injection, and sacrificed 72hr after initial dose.
GSE1849	15741505	GPL96	33	Clinical variability in sickle cell disease (SCD) suggests a role for extra-erythrocytic factors in the pathogenesis of vasoocclusion. We hypothesized that one potential factor, endothelial dysfunction, results from induction of phenotypic changes by circulating factors in SCD patients. The database reports gene expression in cultured human pulmonary artery endothelial cells (HPAEC) exposed to pl…
GSE1849	15741505	GPL97	32	Clinical variability in sickle cell disease (SCD) suggests a role for extra-erythrocytic factors in the pathogenesis of vasoocclusion. We hypothesized that one potential factor, endothelial dysfunction, results from induction of phenotypic changes by circulating factors in SCD patients. The database reports gene expression in cultured human pulmonary artery endothelial cells (HPAEC) exposed to pl…
GSE1860	-	GPL341	24	Animal experiments were performed with male Sprague-Dawley rats (Charles River Laboratories, Boston, MA) weighing 150 ? 200 grams. All experimental protocols used in this study were approved by the Subcommittee on Research Animal Care, Massachusetts General Hospital. Rats were individually housed in a temperature-controlled (25oC) and light-controlled room (12h light-dark cycle) and allowed to ad…
GSE1862	16565170	GPL91	22	Affymetrix U95Av2 expression data from human intestinal cells (Caco-2) and tissues from all intestinal segments (duodenum, jejunum, ileum, colon). Entries contain the search terms ""glycosylase, phosphorylase, cytochrome or nucleoside,"" which were relevant to our search for enzymes capable of cleaving the N-glycosidic bond of nucleoside analog drugs.Keywords = glycosylaseKeywords = phosphorylase…
GSE1869	15769906	GPL96	37	Pre-LVAD and explanted ischemic and nonischemic cardiomyopathy and nonfailing hearts all normalized with RMA
GSE1871	15665042	GPL1261	12	This series contain mouse lung samples treated with Simvastatin and LPS and corresponded controls.
GSE1872	15845649	GPL341	35	Rat mammary tumors induced by N-methyl-N-nitrosurea (NMU) and normal mammary glandKeywords = breast cancerKeywords = rat mammary tumorKeywords = NMUKeywords = animal model.
GSE1873	16037401	GPL339	10	All animals were kept in a controlled environment (22-24 Â°C with a 12 h : 12 h light : dark cycle; lights on at 09.00) on a standard chow diet with free access to water. Five ob/ob mice (sample_ids GSM32865-GSM32869) were placed in the intermittent hypoxia (IH) chamber and subjected to IH for 12 consecutive weeks and compared to pair-fed control exposed to intermittent room (IA) air for 12 weeks…
GSE1880	16641275	GPL91	23	Gene expression profiling of three PEL cell lines compare to three Burkitt's lymphoma lines to figure out the changed genes under KSHV latent infection.Gene expression profiling of two time points on TIVE cells after infection by KSHV compare to TIVE cell without infection by KSHV to figure out the changed genes on TIVE cell under latent infection of KSHV.Gene expression profiling of four time po…
GSE1886	-	GPL339	18	Diethylstilbestrol (DES) inhibits the differentiation of female reproductive tracts during fetal and neonatal days . We examined global gene expressions in the oviduct, uterus and vagina in newborn mice with or without DES. These results suggest understanding the mechanism of the differentiation of female reproductive tracts.
GSE1888	16601082	GPL341	154	Male Sprague-dawley rats were exposed to saline, isopropyl alcohol, 1mg/kg, 3mg/kg or 6 mg/kg sulfur mustard for 30 min, 1 hr, 3 hr, 6 hr, or 24 hr before analysis of lung tissue by oligonucleotide array analysis.Keywords = sulfur mustardKeywords = ratKeywords = lungKeywords = bis-(2-chloroethyl) sulfide
GSE1892	16629162	GPL342	30	The effect of iron-deficiency on duodenal gene expression was investigated in rats at different developmental stages.
GSE1892	16629162	GPL341	30	The effect of iron-deficiency on duodenal gene expression was investigated in rats at different developmental stages.
GSE1906	16713977	GPL81	12	Murine RAW 264.7 peritoneal macrophages were treated with 250 ppm Carbon monoxide (CO) for 3 hours prior to the addition of LPS (10 ng/ml) and then for the subsequent 4 hours of the study. Air-treated cells were maintained for the same time without CO. Total RNA was harvested at 0, 15, 30, 60, 120 and 240 min after LPS addition. CRNA was produced using standard Affymetrix procedures from 10Âµg of…
GSE1907	16933469	GPL91	32	Sarcoidosis + Follow-up 6 month afterKeywords = sarcoidosisKeywords = follow-up
GSE1910	15579277	GPL91	14	Since macrophage activation can now be studied at a global level using modern microarray and proteomic analyses, discovery of novel macrophage activation genes is inevitable and important for understanding HIV-associated dementia (HAD). We isolated two different types of primary human macrophages, microglia and monocyte-derived macrophages (MDM) from brain tissue and whole blood respectively. The…
GSE1912	15520371	GPL81	25	Identification of hair cycle-associated genes from time-course gene expression profile data by using replicate variance. Proc. Natl. Acad. Sci. USA. (2004)
GSE1919	-	GPL91	15	Rheumatoid arthritis (RA) is a chronic, inflammatory joint disease of unknown etiology and pronounced inter-patient heterogeneity. To characterize RA at the molecular level and to uncover key pathomechanisms, we performed whole-genome gene expression analyses. Synovial tissues from rheumatoid arthritis patients were compared to those from osteoarthritis patients and to normal donors.
GSE1921	15548615	GPL81	19	A time course of OTI CD8 T cells transferred to irradiated syngeneic hosts (or unirradiated hosts as control).
GSE1922	-	GPL96	48	K562 cell line mock treated or for 24 hours with one micromolar imatinib.
GSE1923	15994924	GPL91	15	Overall study: Identification of PDGF-dependent patterns of gene expression in U87 glioblastoma cells.RNA was obtained from triplicate dishes of 5 different groups of U87 cells, each (total 15) analyzed with one U95 microarray chip.Three different comparisons were made:1) Clone 3.1 (34580-34582) vs. clone 3.3 (34583-34585) vs. parent U87 (34592-34594).Purpose: demonstrate that the gene expression…
GSE1925	16148108	GPL91	18	IFN-gamma transcriptional responses in control and IFN-gamma primed primary human macrophages
GSE1926	16227411	GPL91	18	Use Of Expression Arrays To Identify Genes From Ovarian Cancer Cells That Are Associated With Carboplatin Sensitivity And Resistance as defined by ChemoFX Assay
GSE1928	16288200	GPL85	30	A robust set of CNS transcript changes was defined by comparing microarray data that describe the injury response of the rat retina [Vazquez-Chona et al., IOVS 2004; GSE1001], brain [Matzilevich et al., J Neurosci Res 2002; GSE1911], and spinal cord [Di Giovanni et al., Ann Neurol 2003; GDS63]. We determined the CNS injury genes that were expressed in cultured astrocytes from rat cortex [GSM34300…
GSE1933	16911805	GPL201	20	Human umbilical cord blood derived mast cells IgE sensitized followed by crosslinking receptor at different time points
GSE1935	16782753	GPL96	24	This series contain unilateral mechanical ventilated canine lung samples.
GSE1937	16620959	GPL96	12	All mRNA was isolated after 8 hours of culture time in each of three culture conditions. (1) TCPS Plate, (2) Collagen-GAG 2 dimensional coated plate and (3) collagen-GAG three dimensional mesh.
GSE1947	15755691	GPL81	21	We compared gene expression at ages P4 and P60 in sciatic nerve of wild type mice and mice with peripheral neuropathies caused by altered Pmp22 gene dosage (homozygous knockout or transgene) or a point mutation (Trembler).
GSE1948	-	GPL32	23	Empty vector, SRF-dM-VP16 (control construct lacking the SRF DNA binding domain), or SRF-VP16 were expressed in wild-type ES cells (E14wt), SRF heterozygotes (E99-/+) or two SRF ko cell lines (E81-/-,E100-/-). RNA was harvested 72h after transfection. Each condition was performed in duplicate, except E100-/- vector transfected.
GSE1949	-	GPL32	15	Murine ES cells of different Srf genotype (E14wt, E100-/-, E100-/- rescue (Srf transgene)) were stimulated with FBS for 0-180 min. RNA was harvested and hybridized to Affymetrix MGU74A arrays.
GSE1977	15356296	GPL91	45	Peripheral blood lymphocytes from a total of 15 healthy individuals without history of cancer (NoCa) were immortalized with Epstein-Barr virus.Cells were exposed to mock treatment (Mock), ultra-violet radiation (UV), or ionizing radiation (IR). For UV radiation treatment, cells were exposed to 10 J/m^2 and harvested for RNA 24 hours later. For IR treatment, cells were exposed to 5 Gy of IR and ha…
GSE1978	15872113	GPL85	23	Micorarray analysis was performed on RNA samples from hippocampal cultures infected with either Ad-aCaN or Ad-LacZ or uninfected. Each sample was applied to its own GeneChip (Rat RG-U34A; n=7-9 chips/group). Chips were then processed and scanned using Agilent Affymetrix GeneArray Scanner. MAS5 was used to determine signal intensity and presence/absence calls for the data.Keywords = bioinformatics…
GSE1982	15637533	GPL91	103	Clinical Pharmacogenomics study. Renal Cell Carcinoma subjects were treated with CCI-779 and peripheral blood mononuclear cells were profiled over time of treatment.Population pharmacokinetics ofCCI-779: Correlations to safety and pharmacogenomics responses inpatients with advanced renal cancer. Clin Pharm Therapeutics Dec 2004
GSE1984	-	GPL81	32	Skeletal muscle C2C12 cells were treated with or without trichostatin A (TSA), which induces differentiation. Total RNA was extracted and profiled at 5 time points after induction of differentiation (0, 4h, 12h, 24h, 48h).
GSE1986	-	GPL1261	17	The aim of this study is to survey global gene expression across a range of mouse tissues. Biotinylated cRNA was synthesized from total RNA, then fragmented and hybridized to Affymetrix Mouse Genome 430 2.0 GeneChip arrays at the Siteman Cancer Center Gene Chip Core Facility (Washington University, St Louis, Missouri) according to manufacturer's protocols. Image files were generated using MicroAr…
GSE1987	-	GPL91	37	This series contain 36 samples obtained from human lung tissue and includes the following:7 Adenocarcinoma samples.16 Squamous cell carcinoma samples.1 AdenoSquamous sample.2 Renal Metastasis.1 Colon metastasis.7 normal lung tissue adjacent to the tumors.2 commercial normal lung RNA.Keywords = LungKeywords = Non Small Cell Lung CancerKeywords = AdenocarcinomaKeywords = Squamous Cell CarcinomaKeyw…
GSE1993	-	GPL96	65	This study aims at investigating differential gene expression in human astrocytic tumours of grades I, II, III and IV. A total of 65 tumours were assessed using the Affymetrix U133A GeneChip. The study aims not only at discovering the main expression differences between astrocytic tumours of distinct histological grades but also wishes to correlate these findings with the known histopathological …
GSE1994	-	GPL341	48	Neurodegenerative brain disorders become more common in the aged. Most of these disorders are associated with or caused by selective death of certain neuronal subpopulations. The mechanisms underlying the differential vulnerability of certain neuronal populations are still largely unexplored and few neuroprotective treatments are available to date. Elucidation of these mechanisms may lead to a gr…
GSE1996	-	GPL341	16	We are searching for common gene expression alteration in the hippocampus of animal models of learning disabilities and in post-mortem human tissues derived from patients with cognitive deficits. Our study has three phases. In phase I, we want to investigate the changes in gene expression in a transgenic mouse line that shows impairments in hippocampal-dependent learning. These animals are overex…
GSE1999	-	GPL1261	15	Hypoxic-ischemic (HI) injury in the developing brain is a common cause of disability in children, and there are no effective treatments at this time. Erythropoietin (EPO) has recently gained interest as a neuroprotective drug, and EPO and its receptor are expressed within the central nervous system. We have recently shown that pretreatment with EPO markedly reduced brain injury caused by unilater…
GSE2004	-	GPL96	25	Normal kidney, liver, spleen, and Universal RNA from Stratagene were expression profiled across five centers (UCLA, Duke, TGen, Children's National Medical Center in Washington, DC, and University of Pennsylvania) using the Affymetrix, spotted Operon, Agilent, and Amersham arrays to identify differences in expression between microarray platforms as well as centers.To compare the four microarray p…
GSE2006	16113833	GPL96	14	Human blood platelets have important, regulatory functions in diverse hemostatic and pathological disorders, including vascular remodeling, inflammation, and wound repair. Microarray analysis was used to study the molecular basis of essential thrombocythemia, a myeloproliferative disorder with quantitative and qualitative platelet defects associated with cardiovascular and thrombohemorrhagic symp…
GSE2018	12958056	GPL96	34	Bronchoalveolar lavage samples collected from lung transplant recipients. Numeric portion of sample name is an arbitrary patient ID and AxBx number indicates the perivascular (A) and bronchiolar (B) scores from biopsies collected on the same day as the BAL fluid was collected. Several patients have more than one sample in this series and can be determined by patient number followed by a lower cas…
GSE2019	15613496	GPL1261	12	Two T7 based methods One round of Amplification (Affymetrix) and Two round of Amplification were compared to two Ribo-SPIA based systems, RiboSPIA and pico Ribo SPIA systems. Data for Pico-RiboSPIA are listed here.All Hybridisation were performed using Affymetrix Mouse 430-2 gene chips. Data were all scaled to 500.For 12 chips performed with pico Ribo SPIA the scaling factor average was 2.0 +/- 0…
GSE2031	15711547	GPL81	44	We have combined large-scale mRNA expression and gene mapping methods to identify genes and loci that control hematopoietic stem cell (HSC) functioning. mRNA expression levels were measured in purified HSC isolated from a panel of densely genotyped recombinant inbred mouse strains. Quantitative trait loci (QTLs) associated with variation in expression of thousands of transcripts were mapped. Comp…
GSE2032	15656902	GPL85	35	Rationale: During excessive pressure or overload, cardiac cells are subjected to increased mechanical stress. We investigate how the stress response of cardiac cells to mechanical stress can be compared to genotoxic stresses induced by DNA damaging agents.Methods: Cultures enriched for cardiomyocytes and cultures of fibroblasts were derived from ventricles of neonatal rat hearts. In three indepen…
GSE2039	15664173	GPL339	19	3 subtypes of cortical projection neurons were purified by fluorescence-activated cell sorting at 4 different stages of development from mouse cortex. A detailed description of the data set is described in Arlotta, P et al (2005)Keywords = corticospinal motor neuron callosal corticotectal cortex development FACS
GSE2044	15504239	GPL91	14	Compatibility between high-density oligonucleotide arrays is significantly affected by probe-level sequence information. With a careful filtering of the probes based on their sequence overlaps, data from different generations of microarrays can be combined more effectively. The dataset of 14 human muscle biopsy samples from patients with inflammatory myopathies that were hybridized on both HG-U95…
GSE2044	15504239	GPL96	14	Compatibility between high-density oligonucleotide arrays is significantly affected by probe-level sequence information. With a careful filtering of the probes based on their sequence overlaps, data from different generations of microarrays can be combined more effectively. The dataset of 14 human muscle biopsy samples from patients with inflammatory myopathies that were hybridized on both HG-U95…
GSE2057	16076931	GPL339	14	Side population (SP) cells are highly enriched in stem and progenitor cells. CD45+and CD45- SP cells were found at all developmental lung stages with the highest frequency of cells present at embryonic day 17.5 (E17.5), In order to clarify the role of these cells in lung development, we used oligonucleotide microarrays to evaluate their gene expression profiles. To do this, oligonucleotide gene a…
GSE2059	-	GPL339	20	murine naive CD8+ T-cell samples for control or treated with 100ng/ml of IL-15 and/or IL-21 for 4 hours
GSE2060	15753290	GPL96	12	The CREB family of transcription factors stimulates cellular gene expression following phosphorylation at a conserved serine (Ser133 in CREB1) in response to cAMP and other extracellular signals. In order to characterize CREB target genes in various tissues, we give a cAMP agonist, forskolin (FSK), to cell lines or primary cultures and monitor the gene expression. To eliminate CREB-independent ef…
GSE2077	14711592	GPL91	18	â¢ The origin of biological samples (In vitro infection of HCT-8 cells with Cryptosporidium parvum)Monolayers of the HCT-8 cells (ATCC CCL-244, American Type Culture Collection) were cultured in RPMI 1640 medium containing 10% fetal bovine serum and additional nutritional supplements. Cells in log phase were plated at 2Ã106 cells per 150 mm tissue culture dish and infected with sterilised Crypt…
GSE2082	15601821	GPL81	24	Primart mouse embryonic fibroblasts (pass 3 to 4) were treated with tunicamycin (2 micrograms/ml) for specified times - genotypes were WILDTYPE and CHOP-/-. Each time point n=4
GSE2084	16322220	GPL340	16	WT,WTR,MU and MUR replicates from Affymetrix GeneChip Mouse Expression Set 430 Arrays A and B
GSE2084	16322220	GPL339	16	WT,WTR,MU and MUR replicates from Affymetrix GeneChip Mouse Expression Set 430 Arrays A and B
GSE2104	15710778	GPL85	55	Affymetrix RG U34A analysis of renal gene expression in Wistar-derived rat strains
GSE2111	16330358	GPL96	12	Human bronchial epithelial cells were treated with vehicle (control), VOSO4 (V, 50 uM) or ZnSO4 (Zn, 50 uM) for 4 hours.
GSE2113	15735737	GPL96	52	This series of microarray experiments contains the gene expression profiles of purified plasma cells (PCs) obtained from 7 monoclonal gammopathy of undetermined significance (MGUS), 39 newly diagnosed multiple myeloma (MM) and 6 plasma-cell leukaemia (PCL) patients. PCs were purified from bone marrow Seriess, after red blood cell lysis with 0.86% ammonium chloride, using CD138 immunomagnetic micr…
GSE2116	15837839	GPL85	23	Left ventricular gene expression profiles from 12-, 16- and 20-months old spontaneously hypertensive rats (SHRs) were compared with left ventricular profiles seen in age-matched Wistar-Kyoto (WKY) rats by screening Affymetrix U34A arrays (there are 4 samples in each timepoint except 3 samples of 20-months old WKYs).
GSE2117	16107895	GPL96	23	Comparison of a series of 6 CALM-AF10 positive T-ALL to a series of 17 CALM-AF10 negative T-ALL
GSE2118	16314843	GPL81	14	The DNA damage response network modulates a wide array of signaling pathways, including DNA repair, cell cycle checkpoints, apoptotic pathways and numerous stress signals. The ATM protein kinase, functionally missing in patients with the human genetic disorder ataxia-telangiectasia (A-T), is a master regulator of this network when the inducing DNA lesions are double strand breaks. The ATM gene is…
GSE2120	16326703	GPL81	18	Expression profiling of 3T3-F442A adipocytes treated with growth hormone (GH, 500 nM) or vehicle (DMEM + 1% BSA) control for 30 min., 4 hr., or 48 hr in three independent experiments. Chronic GH treatment induces metabolic changes consistent with insulin resistance in 3T3-F442A adipocytes.
GSE2124	15843551	GPL339	18	treatment of mesenteric lymph nodes with soluble lymphotoxin-beta receptor for 0,1,2,3,27 and 35 days
GSE2124	15843551	GPL340	18	treatment of mesenteric lymph nodes with soluble lymphotoxin-beta receptor for 0,1,2,3,27 and 35 days
GSE2125	16166618	GPL570	45	This series represents isolated alveolar macrophages from human subjects.
GSE2127	16607285	GPL339	15	Txnip deficient mice with hepatocellular carcinoma
GSE2128	15780994	GPL81	16	Fetal thymic organ culture (FTOC) DC2.5 CD4+CD8+ thymocytes from B6g7 or NOD background. 0 or 16 hour after addition of the BDC mimitopeKeywords = BDC2.5 FTOC thymocyte
GSE2135	16861626	GPL96	14	To assess the function of peripheral blood derived monocytes in patently infected filaria patients (either Wuchereria bancrofti, Mansonella perstans, or both), we investigated the cytokine production and gene expression profile of these cells in filaria infected patients and compared them with those from uninfected normal blood bank donors. Monocytes from infected individuals were studded with in…
GSE2138	16247484	GPL96	20	Expression profile was obtained for GeneChip probe sets among colon cancer specimens with or without the methylation of MLH1 promoter.
GSE2138	16247484	GPL97	20	Expression profile was obtained for GeneChip probe sets among colon cancer specimens with or without the methylation of MLH1 promoter.
GSE2144	16113055	GPL96	10	Differential gene expression analysis of oesophageal cells stimulated with a low pH environment. Study designed to identify pathways involved in progression of gastro-oesophageal reflux disease through Barrett's oesophagus to adenocarcinoma. Identified many subsets of genes with involvement in pathogenesis.Keywords = GORDKeywords = Barrett's OesophagusKeywords = Oesopageal Adenocarcinoma.
GSE2148	-	GPL81	48	Analysis of liver, heart, spleen and lung
GSE2149	-	GPL96	21	Primary effusion lymphomas (PELs) are specifically associated with KSHV/HHV-8 infection, and most frequently occur in HIV-positive individuals as lymphomatous effusions in the serous cavities without a detectable solid tumor mass. Most PELs have concomitant EBV infection, suggesting that EBV is an important pathogenetic co-factor, although other as yet unidentified cofactors, such as cellular gen…
GSE2152	16319128	GPL96	22	A series of gene expression measurements of uterine fibroids with mutated or wild-type fumarate hydratase (FH) gene.
GSE2154	16135533	GPL339	15	Primary micromass cultures derived from 11.5 day old mouse embryo limb buds were cultured for 15 days in differentiating conditions (beta-glycerophosphate and ascorbic acid). Total RNA from differentiating chondrocytes was isolated every three days i.e. days 3,6,9,12 and 15 and hybridized to MOE430A chips. Objective: Gain a view of the temporal gene expression changes occuring during chondrocyte …
GSE2164	14583743	GPL91	87	Gender differences in brain development and in the prevalence of neuropsychiatric disorders such as depression have been reported. Gender differences in human brain might be related to patterns of gene expression. Microarray technology is one useful method for investigation of gene expression in brain. We investigated gene expression, cell types, and regional expression patterns of differentially…
GSE2165	-	GPL96	12	Laser capture microdissection was used to obtain individual LGN layers for DNA microarray in macaque monkeys that underwent monocular eyelid suture at birth.
GSE2171	15897992	GPL201	87	We used Affymetix HG Focus GeneChip to measure the expression levels of HIV seronegative and seropositive individuals in human PBMCs in vivo. GSM39104 -GSM39115 are HIV seronegative samples; GSM39116-GSM39137 are HIV seropositive but drug naive samples; GSM39138-GSM39147 are HIV seropositive samples used to test serostatus biomarker; GSM39148-GSM39170 are HIV seropositive individuals whose CD4 ce…
GSE2174	-	GPL96	10	Umbilical cord blood-derived mononuclear cells were lineage depleted using a StemSep column and cultured in serum-free liquid suspension culture with cytokines SCF, FL, and Tpo. After four days in culture (d4), cultured cells were split into 2 groups; one subjected to media exchange and one subjected to a mock exchange, and cultured for an additional day.RNA was extracted and analyzed on an oligo…
GSE2188	15985538	GPL81	15	The zinc-inducible C/EBP expression vectors pMTa, pMTb, pMTd and pMTe were constructed by cloning the human C/EBPa, C/EBPb, C/EBPd and C/EBPe cDNAs, respectively, into the pMTCB6+ vector. NIH 3T3 cells were transfected with zinc-inducible C/EBP vectors as well as control empty vector using the GenePORTERâ¢ transfection Reagent (GTS Inc.). Multiple polyclonal clones were obtained by selection wit…
GSE2189	-	GPL96	18	Human lung cancer (A549) cells were treated 50uM of the metal cation-containing chemotherapeutic drug motexafin gadolinium (MGd) for 4, 12, and 24 hrs and expression compared to control cells (treated with 5% mannitol for the same length of time)
GSE2191	12738660	GPL91	58	This series represents leukemic samples obtained from pediatric AML patients at diagnosis and control normal bone marrow samples.
GSE2192	16106032	GPL81	53	NIH-3T3 cells transduced with either EBF1-, PPARg2- or empty vector were stimulated with hormones to initiate adipocyte differentiation. RNA extraction was done using TriZol at d0, d2, d4 and d10 after stimulation. Samples were handled according to standard affymetrix protocols.Keywords = AdipogenesisKeywords = adipocyteKeywords = early B-cell factor 1 (EBF1)Keywords = commitmentKeywords = differ…
GSE2195	15598610	GPL81	42	Immature (19/20 days of age) Alpk:APfCD-1 mice were treated with arachis oil (AO) vehicle or 0.4mg/kg 17beta-estradiol (E2), via a single subcutaneous injection, and sacrificed at 1hr, 2hr, 4hr, 8hr, 24hr, 48hr, 72hr post dose.Keywords = estrogenKeywords = gene expressionKeywords = microarrayKeywords = phenotypic anchoringKeywords = uterus
GSE2198	16356168	GPL339	34	Anterior tibialis removed from 3-month old muscle glycogen synthase WT or knockout mouse. RNA was extracted using GibcoBRL TRIzol Reagent and a Quiagen RNeasy kit. Targets were produced using standard Affymetrix procedures from about 5ug of total RNA. GSM40057-GSM40063 AND GSM40956.Liver removed from 3-month old muscle glycogen synthase WT or knockout mouse. RNA was extracted using GibcoBRL TRIzo…
GSE2208	15965235	GPL96	19	Monocytes were isolated from 30 ml of whole blood from each of 19 women, 10 with high BMD and 9 with low BMD, using monocyte negative isolation kit from Dynal Biotech Inc. Total RNA was extracted from monocytes using Qiagen RNeasy Mini Kit. Targets were produced for each subject using standard Affymetrix procedures from about 4ug of total RNA. Hybridization was made for each subject. Comparison w…
GSE2216	15833021	GPL341	176	F344 rats were divided into 4 groups: vehicle control, DEN, DEN+CLO and CLO. After one week of basal diet, rats belonging to the groups DEN and DEN+CLO underwent intraperitoneal injection of DEN (30mg/kg body weight) dissolved in NaCl 9â°. The two other groups were injected with NaCl 9â° alone. At 30mg/kg, DEN is non-necrogenic thus only exhibiting initiating properties. Twelve days after injec…
GSE2225	15831674	GPL96	18	Anti-estrogens and aromatase inhibitors are important drugs in the treatment of estrogen-dependent breast cancer. In order to investigate the effects of these drugs on gene expression in breast cancer cells, we treated estrogen receptor-positive MCF-7 cells, stably transfected with the aromatase gene (known as MCF-7aro cells), with testosterone, 17Î²-estradiol, two aromatase inhibitors (letrozole…
GSE2227	15752064	GPL81	37	This series represent several subgroups of experiments designed to investigate the role of basal immunoglobulin signaling in immature B cell development. The first subgroup of arrays (Ctrl Mhi, Cre Mhi, Cre Mlo) was done to identify the changes in gene expression in immature B cells as a consequence of inducible deletion of surface IgM expression via Cre-LoxP mediated excision of Ig heavy chain. …
GSE2227	15752064	GPL32	12	This series represent several subgroups of experiments designed to investigate the role of basal immunoglobulin signaling in immature B cell development. The first subgroup of arrays (Ctrl Mhi, Cre Mhi, Cre Mlo) was done to identify the changes in gene expression in immature B cells as a consequence of inducible deletion of surface IgM expression via Cre-LoxP mediated excision of Ig heavy chain. …
GSE2240	15817885	GPL97	35	GSE2240 contains two different experimental subsets:1) Comparison of atrial and ventricular gene expression (atrial tissue of patients with sinus rhythm vs. human left ventricular non-failing myocardium)The purpose of our investigation was to identify the transcriptional basis for ultrastructural and functional specialization of human atria and ventricles. Using exploratory microarray analysis (A…
GSE2240	15817885	GPL96	35	GSE2240 contains two different experimental subsets:1) Comparison of atrial and ventricular gene expression (atrial tissue of patients with sinus rhythm vs. human left ventricular non-failing myocardium)The purpose of our investigation was to identify the transcriptional basis for ultrastructural and functional specialization of human atria and ventricles. Using exploratory microarray analysis (A…
GSE2251	15821115	GPL96	12	Gene expression changes caused by estrogen treatment of breast cancer cells that re-express ERalpha was investigated by infecting ER-negative MDA-MB-231 breast cancer cells for 24 h with recombinant adenovirus encoding full-length human ERalpha (Ad-ERalpha) or control vector (Ad-LacZ), and treating them with 0Â·01% ethanol (vehicle control) or 10-8 M 17beta-estradiol (E2). After 48 h of treatment…
GSE2253	17563070	GPL339	20	Murine pancreatic beta cell line MIN6 was growth at two different concentrations of glucose (22,2 and 5,5 mM of glucose), 37ÂºC, 5% CO2 and was treated at four different concentrations of human amylin (0, 1, 10 and 20 uM) during three different times (2, 12 and 24 hours)Keywords = pancreatic beta cellKeywords = amylinKeywords = glucose
GSE2254	15331540	GPL81	18	BDC2.5/NOD mice were treated with cyclophosphamide to induce type 1 diabetes. Their pancreatic islets were analyzed before treatment (Day 0) and as treatment progressed (Days 1 through 3)Keywords = type I diabetesKeywords = cyclophosphamideKeywords = BDC2.5Keywords = NODKeywords = pancreasKeywords = islets
GSE2259	16166195	GPL339	10	To unravel the molecular mechanisms mediating the effects of androgens on spermatogenesis, testicular gene expression was compared in mice with a Sertoli cell-selective androgen receptor knockout (SCARKO) and littermate controls on postnatal d 10. At this age testicular cell composition is still comparable in SCARKOs and controls. Microarray analysis identified 692 genes with significant differen…
GSE2260	16166195	GPL339	10	To unravel the molecular mechanisms mediating the effects of androgens on spermatogenesis, testicular gene expression was compared in mice with a Sertoli cell-selective androgen receptor knockout (SCARKO) and littermate controls on postnatal d 10. At this age testicular cell composition is still comparable in SCARKOs and controls. Microarray analysis identified 692 genes with significant differen…
GSE2270	-	GPL85	83	Summary: Spinal cord injury (SCI) is a damage to the spinal cord induced by trauma or disease resulting in a loss of mobility or feeling. SCI is characterized by a primary mechanical injury followed by a secondary injury in which several molecular events are altered in the spinal cord often resulting in loss of neuronal function. Analysis of the areas directly (spinal cord) and indirectly (raphe …
GSE2270	-	GPL86	81	Summary: Spinal cord injury (SCI) is a damage to the spinal cord induced by trauma or disease resulting in a loss of mobility or feeling. SCI is characterized by a primary mechanical injury followed by a secondary injury in which several molecular events are altered in the spinal cord often resulting in loss of neuronal function. Analysis of the areas directly (spinal cord) and indirectly (raphe …
GSE2270	-	GPL87	80	Summary: Spinal cord injury (SCI) is a damage to the spinal cord induced by trauma or disease resulting in a loss of mobility or feeling. SCI is characterized by a primary mechanical injury followed by a secondary injury in which several molecular events are altered in the spinal cord often resulting in loss of neuronal function. Analysis of the areas directly (spinal cord) and indirectly (raphe …
GSE2275	-	GPL1355	12	Goals of the Study:1. Assess the scope of arginine-responsive hepatic gene expression using in vitro rat models.2. Compare normal and tumorigenic cells3. Identify potentially novel genes and pathways that may be subject to amino acid (arginine) regulationBackground: We previously reported that mRNA levels of the tumor associated glycoprotein amino acid transporter TA1/LAT1/ CD98 light chain argin…
GSE2278	16478828	GPL339	98	gene expression profiles of leukocytes from blood (WBCs) and spleen harvested at an early (two hours) time point after injury or sham injury in mice subjected to trauma-hemorrhage, burn injury or lipopolysaccharide (LPS)-infusion at three experimental sites
GSE2280	15558013	GPL96	27	Metastasis via the lymphatics is a major risk factor in squamous cell carcinoma of the oral cavity (OSCC). We sought to determine whether the presence of metastasis in the regional lymph node could be predicted by a gene expression signature of the primary tumor. A total of 18 OSCCs were characterized for gene expression by hybridizing RNA to Affymetrix U133A gene chips. Genes with differential e…
GSE2292	15802376	GPL201	45	U2OS-ERa, U2OS-ERb, and U2OS-ERab cells treated with 4HT or E2
GSE2294	16740749	GPL96	96	Primary human breast tumors were obtained from the National Cancer Centre of Singapore (NCC) Tissue Repository, after appropriate approvals from the NCC Repository and Ethics Committees. Profiled samples contained at least 50% tumor content.Keywords = Gene expressionKeywords = Breast Cancer
GSE2297	-	GPL339	10	1 week and 8 week male and female brains from littermates of age matched C57BL/6 mice week used to study expression profiles. Affymetrix MOE430A Genechip was used
GSE2303	15914576	GPL85	94	The project had 2 goals:1) To evaluate the transcriptional response of 3 prototypical toxicants (Clofibrate, VPA, and DEHP) on rat lever.2) To evaluate the impact pooling samples has on data analysis.Keywords = ClofibrateKeywords = Diethylhexyl phthalateKeywords = Phthalic acid bis(2-ethylhexyl ester)Keywords = Sodium ValproateKeywords = Valproic AcidKeywords = VPAKeywords = vehicle
GSE2322	16861384	GPL96	58	Human volunteers were exposed to endotoxin by bronchoscopic instillation, airspace and circulating neutrophils were isolated 16 hours later and compared to circulating neutrophils obtained prior to endotoxin exposure, and to circulating neutrophils exposed to endotoxin in vitro.Keywords = pulmonary inflammantionKeywords = acute lung injuryKeywords = acute respiratory distress syndrome
GSE2326	-	GPL96	19	Gene Expression Analysis of Squamous Cell Carcinoma of Head and Neck
GSE2326	-	GPL97	19	Gene Expression Analysis of Squamous Cell Carcinoma of Head and Neck
GSE2328	15781863	GPL96	79	expression files supporting: Application of genome-wide expression analysis to human health and disease. PNASSupplementary Information: http://www.gluegrant.org/pubsupport/PNAS_1/Keywords = clinical studiesKeywords = gene expressionKeywords = inflammationKeywords = microarrayKeywords = trauma
GSE2331	15755808	GPL341	56	Rat mammary glands were obtained from individual rats in RXR treated (a) and control (b) conditions (12 rats in each condition). The 24 samples were hybridized individually. Also, in each condition, samples were combined into different pools of 2, pools of 3, pools of 12. Technical replicates were also run.
GSE2332	15834136	GPL81	18	This study compares a comprehensive microarray analysis of unsorted mCOB cultures at two level of cell differentiation with cells that are more homogeneous for a level of cellular differentiation.It demonstrates the loss of information and in some cases misinformation that occurs when a heterogeneous population of cells are used for a microarray study.
GSE2332	15834136	GPL82	13	This study compares a comprehensive microarray analysis of unsorted mCOB cultures at two level of cell differentiation with cells that are more homogeneous for a level of cellular differentiation.It demonstrates the loss of information and in some cases misinformation that occurs when a heterogeneous population of cells are used for a microarray study.
GSE2332	15834136	GPL83	13	This study compares a comprehensive microarray analysis of unsorted mCOB cultures at two level of cell differentiation with cells that are more homogeneous for a level of cellular differentiation.It demonstrates the loss of information and in some cases misinformation that occurs when a heterogeneous population of cells are used for a microarray study.
GSE2342	-	GPL339	16	For generation of pre-B cell lines, bone marrow from tibias and femurs of 4 to 8 week old C56Bl/6 mice (wt and vav-Gfi1b transgene) was infected with retroviral stocks of different BCR-Abl constructs (MSCV-GFP-IRESp210 or pSRa-p210-tkneo) and plated at a density of 5E+06 per 6 cm dish. All pre-B cells were fed twice a week and analyzed after they became stroma independent. Cells received 1E-08 M …
GSE2351	15837626	GPL96	129	Acute lymphoblastic leukemia (ALL) can be cured with combination chemotherapy in over 75% of children, but the cause of treatment failure in the remaining patients is unknown. We determined the sensitivity of ALL cells to individual antileukemic agents in 441 patients, and used a genome-wide approach to identify 45 genes differentially expressed in ALL exhibiting cross-resistance to prednisolone,…
GSE2354	16131529	GPL341	35	Whole tissues corresponding to the proximal and distal small intestine and to the colon were dissected from each rat, washed with ice-cold saline solution and immediately frozen in liquid nitrogen. Rats were either control or treated with Amoxicillin (100mg/kg/day). Small intestine was divided in two identical length considered as the proximal and distal part. In each intestinal part 1 cm of tiss…
GSE2355	-	GPL81	16	Analysis of cardiac specific AT1 transgenic mice undergoing cardiac failure, cardiac hypertrophy and wild type aged matched controls. For detailed description of the AT1 Tg mice please refer to:Paradis P, Dali-Youcef N, Paradis FW, Thibault G, Nemer M.Overexpression of angiotensin II type I receptor in cardiomyocytes induces cardiac hypertrophy and remodeling.Proc Natl Acad Sci U S A. 2000 Jan 18…
GSE2355	-	GPL82	16	Analysis of cardiac specific AT1 transgenic mice undergoing cardiac failure, cardiac hypertrophy and wild type aged matched controls. For detailed description of the AT1 Tg mice please refer to:Paradis P, Dali-Youcef N, Paradis FW, Thibault G, Nemer M.Overexpression of angiotensin II type I receptor in cardiomyocytes induces cardiac hypertrophy and remodeling.Proc Natl Acad Sci U S A. 2000 Jan 18…
GSE2361	15950434	GPL96	36	We performed expression profiling of 36 types of normal human tissues and identified 2,503 tissue-specific genes. We then systematically studied the expression of these genes in cancers by re-analyzing a large collection of published DNA microarray datasets. Our study shows that integration of each gene's breadth of expression (BOE) in normal tissues is important for biological interpretation of …
GSE2375	-	GPL81	11	Embryonic stem (ES) cells and ES cell-derived progeny characterized by nestin expression (including neural progenitors) were studied (three independent experiments). The mouse ES cell line R1 was cultured on a feeder layer of mouse embryonic fibroblasts (FL). ES cells were differentiated into nestin-positive cells for 4+8 days and 4+11 days according to the differentiation protocol by Rolletschek…
GSE2377	12759259	GPL91	48	The etiology of the central nervous system (CNS) alterations after human immunodeficiency virus (HIV) infection, such as dementia and encephalitis, remains unknown. We have used microarray analysis in a monkey model of neuroAIDS to identify 98 genes, many previously unrecognized in lentiviral CNS pathogenesis, whose expression is significantly up-regulated in the frontal lobe of simian immunodefi…
GSE2378	11921203	GPL91	15	Astrocytes from optic nerve head from donors with and without glaucoma
GSE2379	14676830	GPL91	38	Gene expression analysis of a unique HNSCC (Head and Neck Squamous Cell Carcinoma) localization, the hypopharynx. Four normal and 34 tumor samples were analysed using Affymetrix HG-U95A microarrays containing probe sets representing ~12650 distinct transcription features.Keywords = HNSCC Hypopharynx
GSE2386	-	GPL96	20	The transcript profiles were measured using total RNAs from low (0.1mM) and high (2.0mM) treated THLE-3 cells across 5 time points.
GSE2392	14588109	GPL85	39	Summary: Brain trauma is a major cause of morbidity and mortality, both in adult and pediatric populations. Much of the functional deficit derives from delayed cell death resulting from induction of neurotoxic factors that overwhelm endogenous neuroprotective responses.Hypothesis: Gene expression profiling across species and models may help identify candidate molecular pathways induced by brain i…
GSE2392	14588109	GPL81	22	Summary: Brain trauma is a major cause of morbidity and mortality, both in adult and pediatric populations. Much of the functional deficit derives from delayed cell death resulting from induction of neurotoxic factors that overwhelm endogenous neuroprotective responses.Hypothesis: Gene expression profiling across species and models may help identify candidate molecular pathways induced by brain i…
GSE2393	15579284	GPL91	34	The virus/host interactions during the acute phase of human immunodeficiency virus (HIV) infection help determine the course of disease. During this time period, virus enters the brain. Here, we report clusters of genes whose transcripts are significantly upregulated in the frontal lobe of the brain during acute simian immunodeficiency virus (SIV) infection of rhesus monkeys. Many of these genes …
GSE2395	16614352	GPL97	20	Summary: CF patients homozygous for the DF08 DF08 genotype present a full range of phenotypic manifestations that exist within the pulmonary system. This project aims to identify candidate genes that influence the severity of pulmonary diseaseHypothesis: The goal is to find genes predictive of progression in CF. More information can be found at http://www.hopkins-genomics.org/cf/cf001/index.html
GSE2395	16614352	GPL96	20	Summary: CF patients homozygous for the DF08 DF08 genotype present a full range of phenotypic manifestations that exist within the pulmonary system. This project aims to identify candidate genes that influence the severity of pulmonary diseaseHypothesis: The goal is to find genes predictive of progression in CF. More information can be found at http://www.hopkins-genomics.org/cf/cf001/index.html
GSE2397	16300372	GPL570	24	Cellular responses to 4-hydroxy-2-nonenal (HNE)--dose response and time course--three replicate experiments for each treatment
GSE2403	16038780	GPL91	21	Objective. B-cell chronic lymphocytic leukemia is a heterogeneous disease with a pronounced variation in the clinical course. With the purpose of identifying genes that could be related to disease progression, we have performed gene expression profiling on B-CLL patients with an indolent disease and patients with a progressive disease with need for therapy.Materials and Methods. We applied the Af…
GSE2405	15879137	GPL96	67	Polymorphonuclear leukocytes (PMNs) were obtained from healthy individuals in accordance with protocols approved by the Institutional Review Board for Human Subjects at the University of Minnesota and the National Institute of Allergy and Infectious Diseases.PMNs (107) were combined on ice with live S. aureus (108) or with live or heat-killed A. phagocytophilum (bacteria isolated from 5x106 infec…
GSE2411	16116230	GPL339	24	This experiment investigated the role of mechanical ventilation (MV) in modulating lung's transcriptional response to LPS. Twenty four C57/B6 male mice were randomized to four groups: 1. Control, 2. MV, 3. LPS and 4. MV+LPS. Expression profiling of whole lungs revealed a significant augmentation of the transcriptional response in the combined MV+LPS group relative to the other 3 conditions.
GSE2413	15939874	GPL339	26	AbstractAlthough a substantial number of hormones and drugs increase cellular cAMP levels, the global impact of cAMP and its major effector mechanism, protein kinase A (PKA), on gene expression is not known. Here we show that treatment of wild-type S49 lymphoma cells for 24 h with 8-(4-chlorophenylthio)-cAMP (CPT-cAMP), a PKA-selective cAMP analog, alters the expression of ~4500 of ~13,600 unique…
GSE2426	-	GPL81	14	SUMMARYMedulloblastoma is the most common malignant brain tumor in children. It is thought to result from transformation of granule cell precursors (GCPs) in the developing cerebellum, but little is known about the early stages of the disease. Here we identify a pre-neoplastic stage of medulloblastoma in patched heterozygous mice, a model of the human disease. We show that pre-neoplastic cells ar…
GSE2431	16189280	GPL81	32	Mice and diets. One-month-old male mice of the long-lived B6C3F1 strain were purchased from Harlan (Indianapolis, IN) and maintained as described after weaning (15). Mice were housed in groups of 4 per cage and fed a non-purified diet, PMI Nutrition International Product #5001 (Purina Mills, Richmond, IN). At 5 months of age, the mice were individually housed, and randomly assigned to one of two …
GSE2433	15895080	GPL1261	10	Background:Children with Down syndrome (DS) are predisposed to acute megakaryoblastic leukemia (AMKL, or AML M7) and a related myeloid disorder, referred to as transient myeloproliferative disorder (TMD), or transient leukemia (TL). Recently, acquired mutations in the erythroid/megakaryocytic lineage-specific transcription factor GATA-1 have been identified in megakaryoblasts from virtually all D…
GSE2437	16027002	GPL81	15	Expression profiling of mRNA abundance in the adult mouse olfactory epithelium during replacement of OSNs forced by the bilateral ablation of the olfactory bulbs. The experiment was done on 6 week old male C57Bl/6 mice. Olfactory epithelium tissue samples were collected on days 1, 5, and 7 after bulbectomy. The cellular processes activated by bulbectomy include apoptosis of mature olfactory senso…
GSE2443	16203770	GPL96	20	Affymetrix U133A comparison of two groups (10 samples each): untreated (androgen-dependent) primary prostate cancer (Gleasons 5-9) and androgen-independent primary prostate cancer. All samples were microdissected for tumor cells only.Keywords = advanced prostate cancerKeywords = androgen-independenceKeywords = laser capture microdissectionKeywords = RNA amplification
GSE2449	-	GPL96	11	Infected and Uninfected with VSV
GSE2450	16575254	GPL96	16	Rationale: Immortalized cells may exhibit important differences relative to their primary cell counterparts. Microarrays were used compare primary human umbilical vein endothelial cells (HUVECs) and the immortalized HUVEC cell line EA.hy926, in their response to inhibition of the mevalonate pathway by a HMG-CoA reductase inhibitor (atorvastatin). The effects of atorvastatin were reversed by the a…
GSE2457	16118269	GPL341	10	Gene expression analysis in control and diabetic rats. Diabetes-induced erectile dysfunction in rat model of DM. 10 weeks of streptozotocin induced diabetes. F344 Rats.
GSE2459	16835353	GPL81	15	Expression profiling of hearts from FVB males subjected to cardiac pressure overload by transverse aortic constriction (TAC). TAC performed on 8-10 weeks month old males and females. Hearts examined 30 weeks after surgery.
GSE2466	15459216	GPL91	111	We used high density oligonucleotide arrays to identify molecular correlates of genetically and clinically distinct subgroups of B-cell chronic lymphocytic leukemia (B-CLL). Gene expression profiling was used to profile the five most frequent genomic aberrations, namely deletions affecting chromosome bands 13q14, 11q22-q23, 17p13 and 6q21, and gains of genomic material affecting chromosome band 1…
GSE2470	-	GPL341	12	Background and Aims: It is well demonstrated that in the beta cell population of the pancreas there is a dynamic turnover, which results from the net balance of several processes; beta cell replication, apoptosis and neogenesis. These processes have been studied in partial pancreatectomy and glucagon-like peptide 1 treated animals, where an increase in pancreas regeneration has been observed. Sim…
GSE2485	16254489	GPL96	18	By comparing to common tumor cells, genes were differencially expressed in pseudopalisading cells in human glioblastoma
GSE2487	16079833	GPL96	10	This experiment was designed to study oncogene-induced senescence (OIS). To this end we generated a series of cell lines derived from normal human diploid fibroblasts IMR90 forced to express the catalytic subunit of telomerase (hTERT). This cells were then subjected to further manipulation by orderly introducing defined genetic elements by retroviral transduction. The first cell line generated wa…
GSE2489	15722350	GPL91	16	Cultured keratinocytes treated with TNFa in the presence or absence of NFkB inhibitor; time course 1, 4, 24 & 48 hrs.Keywords = EpidermisKeywords = skinKeywords = keratinocytesKeywords = inflammationKeywords = NFkBKeywords = TNFa
GSE2499	15959507	GPL85	20	Experiment comparing Low-density, CCg derived, progenitors (LDP) with high-density progenitors (HDP), and neurons (LDN) and astrocytes (LDA) derived from the LDP condition
GSE2501	16354692	GPL81	10	The experiment was to compare leukemic T cells from thymic lymphomas from homozygote mice for the IkL/L hypomorphic mutation and non-transformed thymocytes, either of WT or IkL/L genotype. The aim was to identify a gene expression signature specific to the IkL/L tumors.Keywords = thymic lymphoma Ikaros
GSE2503	16893473	GPL96	15	normal skin (no), actinic keratosis (ak), and squamous cell carcinoma (scc) of the skin were examined:Carcinogenesis is a multi-step process indicated by several genes up- or down-regulated during tumor progression. The type and number of genes involved in non-melanoma skin cancer (NMSC) are still unclear. This study examined and identified different expressed genes in NMSC. Fifteen snap-frozen b…
GSE2505	16352629	GPL571	11	Gene networks involved in HIV-1 infection of human PBMCs were investigated by dose dependant infection with HIV-1 (Bal). Perturbation of networks was evaluted using a co-infection with N. gonorrheae. Hierarchical clustering, fold change analysis, and contour mapping of genes was used to identify gene groups that were then anlayzed for statisically significant associations using EASE.
GSE2507	16237120	GPL81	20	Dysferlin is expressed in skeletal and cardiac muscle. However, dysferlin deficiency, namely limb girdle muscular dystrophy 2B (LGMD2B) and Myoshi myopathy, results in skeletal muscle weakness and spares the heart. This dichotomy could be caused by differential regulation of protective mechanisms. Therefore, we compared intraindividual mRNA expression profiles between cardiac and skeletal muscle …
GSE2508	16059715	GPL95	39	Microarray analysis comparing gene expression profiles of adipocytes from non-diabetic lean vs non-diabetic obese Pima Indian subjects to identify differentially expressed adipocyte genes with obesity. RNA samples of isolated abdominal subcutaneous adipocytes from 20 lean (10 Males / 10 Females, aged 31Â±6 year, Body Mass Index 25Â±3 kg/m2 ) and 19 obese (9M/10F, 29Â±5y, 55Â±8 kg/m2 ) subjects we…
GSE2508	16059715	GPL91	39	Microarray analysis comparing gene expression profiles of adipocytes from non-diabetic lean vs non-diabetic obese Pima Indian subjects to identify differentially expressed adipocyte genes with obesity. RNA samples of isolated abdominal subcutaneous adipocytes from 20 lean (10 Males / 10 Females, aged 31Â±6 year, Body Mass Index 25Â±3 kg/m2 ) and 19 obese (9M/10F, 29Â±5y, 55Â±8 kg/m2 ) subjects we…
GSE2508	16059715	GPL94	39	Microarray analysis comparing gene expression profiles of adipocytes from non-diabetic lean vs non-diabetic obese Pima Indian subjects to identify differentially expressed adipocyte genes with obesity. RNA samples of isolated abdominal subcutaneous adipocytes from 20 lean (10 Males / 10 Females, aged 31Â±6 year, Body Mass Index 25Â±3 kg/m2 ) and 19 obese (9M/10F, 29Â±5y, 55Â±8 kg/m2 ) subjects we…
GSE2508	16059715	GPL92	39	Microarray analysis comparing gene expression profiles of adipocytes from non-diabetic lean vs non-diabetic obese Pima Indian subjects to identify differentially expressed adipocyte genes with obesity. RNA samples of isolated abdominal subcutaneous adipocytes from 20 lean (10 Males / 10 Females, aged 31Â±6 year, Body Mass Index 25Â±3 kg/m2 ) and 19 obese (9M/10F, 29Â±5y, 55Â±8 kg/m2 ) subjects we…
GSE2508	16059715	GPL93	39	Microarray analysis comparing gene expression profiles of adipocytes from non-diabetic lean vs non-diabetic obese Pima Indian subjects to identify differentially expressed adipocyte genes with obesity. RNA samples of isolated abdominal subcutaneous adipocytes from 20 lean (10 Males / 10 Females, aged 31Â±6 year, Body Mass Index 25Â±3 kg/m2 ) and 19 obese (9M/10F, 29Â±5y, 55Â±8 kg/m2 ) subjects we…
GSE2510	16034612	GPL97	28	Microarray analysis comparing gene expression profiles of primary cultured preadipocytes from non-diabetic lean vs non-diabetic obese Pima Indian subjects (a subset of the subjects from the adipocyte genechip project, GSE2508). Primary cultured abdominal subcutaneous preadipocytes from 14 lean (7 Males / 7 Females) and 14 obese (7M/7F) subjects were hybridized individually to Affymetrix oligonucl…
GSE2510	16034612	GPL96	28	Microarray analysis comparing gene expression profiles of primary cultured preadipocytes from non-diabetic lean vs non-diabetic obese Pima Indian subjects (a subset of the subjects from the adipocyte genechip project, GSE2508). Primary cultured abdominal subcutaneous preadipocytes from 14 lean (7 Males / 7 Females) and 14 obese (7M/7F) subjects were hybridized individually to Affymetrix oligonucl…
GSE2513	16488932	GPL96	12	Gene Expression profiling of pterygium. Analysis of conjunctiva and pterygium samples.Keywords = pterygium
GSE2514	16314486	GPL81	44	Lung tumors
GSE2514	16314486	GPL91	39	Lung tumors
GSE2521	15846361	GPL96	20	Microarray technology is a powerful tool able to measure RNA expression for thousands of genes at once. Various studies have been published comparing competing platforms with mixed results: some find agreement, others do not. As the number of researchers starting to use microarrays and the number of cross platform meta-analysis studies rapidly increase, appropriate platform assessments become mor…
GSE2522	16005468	GPL91	12	Comparison of SMC resistant and sensitive to TGF and Fas ligation by CH11 antibody
GSE2528	15897883	GPL81	14	To identify early events of erbB2-induced mammary tumorigenesis, we compared datasets from 14 genechip experiments including MMTV-neu tumors, preneoplastic neu mammary gland (adjacent neu), and age-matched, wild-type control mammary glandsKeywords = transgenic mouseKeywords = MMTV-neuKeywords = erbB2Keywords = HER2Keywords = mammary tumor
GSE2534	17009876	GPL81	35	GSM48315-GSM48332: Ten cells from C57Bl/6 male mouse bone marrow (SP or CD8 T cells) were sorted into individual wells of 96-well plates. The mRNA of these cells was amplified by the global single cell RT-PCR method and biotinylated targets were generated after optimal digestion with DNAse I.GSM48333-GSM48344: Single SP cell from C57Bl/6 male mouse bone marrow were sorted into individual wells of…
GSE2535	15820940	GPL91	28	This is a class prediction experiment, where the class is the response status to imatinib (also called Gleevec), a drug used to treat patients with chronic myelogenous leukemia (CML). There are two data sets, a training set (from Leipzig, 8 Responders and 5 Non-Responders) and a validation set (from Mannheim, 8 Responders and 7 Non-Responders). The objective is to identify differentially regulate…
GSE2549	-	GPL96	54	Malignant pleural mesothelioma (MPM) is a highly lethal, poorly understood neoplasm that is typically associated with asbestos exposure. We performed transcriptional profiling using high-density oligonucleotide microarrays containing approximately 22,000 genes to elucidate potential molecular and pathobiological pathways in MPM using discarded human MPM tumor specimens (n=40), normal lung specime…
GSE2552	16251966	GPL201	100	Baseline expression levels of genes in CEPH individuals from the International HapMap Project were measured using the Affymetrix Human Genome Focus Arrays. Arrays were analyzed using MAS 5.0 software (Affymetrix).Keywords = Gene Expression, lymphoblastoid cells, human
GSE2556	15895078	GPL81	28	Insulin and IGF-1 promote adipocyte differentiation via complex and overlapping signalling networks. Here we used microarray analysis of brown preadipocytes derived from wild-type and insulin receptor substrate (IRS) knockout (KO) animals, which exhibited progressively impaired differentiation, to define the set of genes that predict adipogenic potential in these cells. 374 genes/ESTs were identi…
GSE2565	16300373	GPL339	104	Carbonyl chloride (phosgene) is a toxic industrial compound (TIC) widely used in industry for the production of synthetic products, such as polyfoam rubber, plastics, and dyes. Exposure to phosgene results in a latent (1-24 hr), potentially life-threatening pulmonary edema and irreversible acute lung injury. A genomic approach was utilized to investigate the molecular mechanism of phosgene-induce…
GSE2567	-	GPL91	10	By performing oligonucleotide microarray analysis the role of Smad4 in response to TGF-Ã was evaluated in established MDA-MB-468 Smad4 negative and positive clones that were treated with TGF-Ã for different time points.
GSE2581	-	GPL85	32	32 arrays from 6 rat strains
GSE2582	15126236	GPL341	16	Impact of PPAR gamma overexpression and activation on rat pancreatic islet gene expression profile analyzed with oligonucleotide microarrays
GSE2585	15983066	GPL81	16	Gene expression in different thymic stromal cells and subsets thereof was analyzed in 6-12 week old wild type (C57BL/6) and Aire knock-out (mixed background) mice. Thymic stromal cells were purified by sequential enzymatic digestion (collagenase, collagenase/dispase and trypsin) followed by gradient centrifugation and FACS sorting. Sort criteria were as follows: dendritic cells (CD11c+, F4/80 -),…
GSE2595	16317082	GPL81	30	Three cell types, intermediolateral column motoneurons, medial motoneurons, and lateral motoneurons were isolated from a single adult spinal cord using laser capture microscopy. Four hundred captures were collected for each cell type. For a given cell type, RNA was extracted from the 400 captures using an Arcturus picopure kit. RNA was split in half and two targets were produced using a double am…
GSE2603	16049480	GPL96	121	Subpopulations of MDA-MB-231 that exhibit different metastatic tropisms when injected into immuno-deficient mice. Also, a cohort of primary breast cancers surgically resected at the Memorial Sloan-Kettering Cancer Center (MSKCC).Keywords = Breast cancerKeywords = lung metastasis
GSE2624	15722553	GPL91	32	TNF time course series of HelA tet off cells cultured in presence or absence of DoxTNF is a pro-inflammatory cytokine that controls expression of inflammatory genetic networks. Although the Nuclear Factor-kB (NF-kB) pathway is crucial for mediating cellular TNF responses, the complete spectrum of NF-kB dependent genes is unknown. In this study, we used a tetracycline-regulated cell line expressin…
GSE2629	16288871	GPL81	12	By comparing the transcriptome from proximal (quadriceps femoris, QF) and distal (tibialis anterior, TA)muscle groups in dysferlin deficient mouse muscle (the SJL mutation bred onto C57BL/10 to produces C57BL/10-SJL.Dysf) with proximal and distal muscle groups from control C57BL/10 mice of an equivalent age (3-weeks old, prior to the onset of overt pathology) we aim to address the issues of muscl…
GSE2634	15976184	GPL570	17	Gene expression profiling is an important tool in the development of medical countermeasures against chemical warfare agents (CWAs). Non-human primates (NHPs), specifically the rhesus macaque (Macaca mulatta), the cynomologus macaque (Macaca fascicularis) and the African green monkey (Chlorocebus aethiops), are vital models in the development of CWA prophylactics, therapeutics, and diagnostics. H…
GSE2636	17250968	GPL85	20	L5 DRG samples from CCI, Seltzer and sham models collected at 14, 21 and 50 days after surgery from ipsilateral hind limb. Note that all replicates are techincal, i.e., there were no biological replicates in this study as samples were pooled for each group
GSE2640	15937080	GPL339	21	right lung gene expression of C57BL/6J, A/J and C3H/HeJ mice following bleomcyin exposure
GSE2649	16269079	GPL80	42	NO effects on gene expression, independent of cGMP, were examined globally. Differentiated human U937 cells that lack soluble guanylate cyclase were exposed to Snitrosoglutathione, a NO donor, or glutathione without or with dibutyryl-cAMP (Bt2cAMP). NO regulated 110 transcripts that annotated disproportionately to the cell cycle and cell proliferation (47/110, 43%) and more frequently than expect…
GSE2665	16440291	GPL96	20	Lymph node vs. tonsil
GSE2666	16089502	GPL96	18	The global gene expression profiles of human umbilical cord blood and adult bone marrow CD34+CD33-CD38-Rho(lo)c-kit+ cells, enriched for hematopoietic stem/progenitor cells (HSC) with CD34+CD33-CD38-Rho(hi) cells, enriched in committed hematopoietic progenitor cells (HPC), were compared to identify candidate regulators of HSC self-renewal versus differentiation fate decisions.
GSE2666	16089502	GPL97	18	The global gene expression profiles of human umbilical cord blood and adult bone marrow CD34+CD33-CD38-Rho(lo)c-kit+ cells, enriched for hematopoietic stem/progenitor cells (HSC) with CD34+CD33-CD38-Rho(hi) cells, enriched in committed hematopoietic progenitor cells (HPC), were compared to identify candidate regulators of HSC self-renewal versus differentiation fate decisions.
GSE267	12704389	GPL91	16	primary ALL cells from bone marrow aspirates taken two days after in vivo treatment with low-dose methotrexate and mercaptopurine
GSE2677	16293608	GPL570	39	Glucocorticoids (GC) are in most chemotherapy protocols for lymphoid malignancies, particularly childhood acute lymphoblastic leukaemia (ALL) for their ability to induce apoptosis in malignant blast. The underlying mechanism, however, has so far only been investigated in model systems. This study comprises Affymetrix hgu133 plus 2.0 analyses ofPeripheral blood lymphoblasts purified at three time …
GSE268	12704389	GPL91	22	primary ALL cells from bone marrow aspirates taken two days after in vivo treatment with high-dose methotrexate
GSE2685	11782383	GPL80	30	To gain molecular understanding of carcinogenesis, progression, and diversity of gastric cancer, 22 primary human advanced gastric cancer tissues and 8 noncancerous gastric tissues were analyzed by high-density oligonucleotide microarray in this study. Based on expression analysis of approximately 6800 genes, a two-way clustering algorithm successfully distinguished cancer tissues from noncancero…
GSE269	12704389	GPL91	10	primary ALL cells from bone marrow aspirates taken two days after in vivo treatment with high-dose methotrexate and mercaptopurine
GSE2690	16002099	GPL1355	12	The interaction of genetics and environment play a major role in health and disease. Therefore, modeling experiments to investigate gene-environment interaction in a laboratory setting would provide the opportunity to gain mechanistic insight under controlled conditions. In laboratory research it is unclear if the gene-environment interaction of a sedentary lifestyle predisposes laboratory animal…
GSE2699	16197558	GPL96	12	HepG2 tet-off hPPARs treated with ligands
GSE270	12704389	GPL91	12	primary ALL cells from bone marrow aspirates taken two days after in vivo treatment with mercaptopurine
GSE2706	15995707	GPL570	21	Toll like receptors (TLRs) sense microbial products and initiate adaptive immune responses by activating dendritic cells (DCs). Since pathogens may contain several agonists we asked whether different TLRs may synergize in DC activation. We report that in human and mouse DC TLR3 or TLR4 potently synergize with TLR7, TLR8 or TLR9 in the induction of selected cytokine genes. Upon synergistic stimula…
GSE2712	16299227	GPL96	35	Clear cell sarcoma of the kidney (CCSK), the second most common renal tumor in children, poses significant diagnostic challenges. No diagnostic positive markers are available, and the pathogenesis of CCSK remains an enigma. To address these challenges, the gene expression patterns of fourteen CCSKs were compared to fifteen Wilms tumors (WT) and three fetal kidney samples using oligonucleotide arr…
GSE2719	16603191	GPL96	54	Gene expression profiles of 39 human sarcoma samples (GSM 52571-GSM52609) and 15 control samples (GSM52556-GSM52570) were assessed using Affymetrix HG U133A oligonucleotide arrays.
GSE272	12538694	GPL76	69	Expression profiles of seven consecutive stages of mouse thymocyte development were generated. Previously known expression patterns of several genes were confirmed. Ten percent (1,304 of more than 13,000) of the monitored genes were found with 99% confidence to be differentially expressed across all T cell developmental stages. When compared with 1,204 genes differentially expressed in five conse…
GSE272	12538694	GPL75	69	Expression profiles of seven consecutive stages of mouse thymocyte development were generated. Previously known expression patterns of several genes were confirmed. Ten percent (1,304 of more than 13,000) of the monitored genes were found with 99% confidence to be differentially expressed across all T cell developmental stages. When compared with 1,204 genes differentially expressed in five conse…
GSE2723	-	GPL571	30	This sample is part of a study that compares small sample amplification technologies. The analysis looks at differential gene expression when compared to one round of T7 amplification. A tumor cell line was used in comparison to a human reference RNA in this study.Keywords = amplificationKeywords = small sampleKeywords = Affymetrix
GSE2724	16319128	GPL96	18	A series of gene expression measurements of uterine fibroids with mutated fumarate hydratase (FH) gene and normal myometrium.
GSE2725	16319128	GPL96	10	A series of gene expression measurements of normal myometrium and uterine fibroids with mutated or wild-type fumarate hydratase (FH) gene.
GSE2727	-	GPL96	63	This study aims at investigating differential gene expression in human diffusely infiltrating astrocytic tumours, grades II, III and IV. A total of 63 tumours were assessed using the Affymetrix U133A GeneChip. Samples comprised in this GEO submission are identical to those in submission GSE1993 with the exception of two pilocytic astrocytoma tumours (grade I) that have not been included. The stud…
GSE2729	17267507	GPL91	23	Rotavirus infection is the single most important cause of severe diarrhea in young children worldwide. We used Affymetrix Human U95Av2 high density oligonucleotide arrays to compare gene expression profiles in peripheral blood mononuclear cells (PBMC) of 10 children with acute rotavirus diarrhea and 8 age-matched healthy children. We also examined patterns of gene expression in 5 convalescent-pha…
GSE2737	16283139	GPL91	11	Gene expression profiling was performed on biopsies of affected and unaffected psoriatic skin and normal skin from seven Japanese patients to obtain insights into the pathways that control this disease. U95A Affymetrix DNA chips that contain oligonucleotide arrays of approximately 12,000 well-characterized human genes were used in the study. The statistical analysis of the Affymetrix data, based …
GSE2742	16474387	GPL96	27	Total RNA was extracted from apratoxin A or vehicle treated HT29 cells using the RNeasy Mini Kit (Qiagen). Probe values from CEL files were condensed to probe sets using Rosetta Resolver software. Resolver ANOVA analysis was then performed between groups.
GSE2746	16478789	GPL339	36	Mouse embryonic fibroblasts (MEFs) were generated from 13.5-day-old embryos obtained from heterozygous PKBa mice intercrosses (Yang et al., 2003). Briefly, after dissection of head and visceral organs for genotyping, embryos were minced and trypsinized for 30 min at 37Â°C. Embryonic fibroblasts were then plated and maintained in Dulbeccoâs Modified Eagle Medium (DMEM) with 10% foetal calf serum…
GSE2748	15994935	GPL570	34	BACKGROUND: Despite the moderate incidence of papillary renal cell carcinoma(PRCC), there is a disproportionately limited understanding of its underlying geneticprograms. There is no effective therapy for metastatic PRCC, and patients are oftenexcluded from kidney cancer trials. A morphological classification of PRCC into Type 1 and Type 2 tumors has been recently proposed, but its biological rel…
GSE2770	14607935	GPL97	34	Th1 and Th2 cells arise from a common precursor cell in response to triggering through the TCR and cytokine receptors for IL-12 or IL-4. This leads to activation of complex signaling pathways, which are not known in detail. Disturbances in the balance between type 1 and type 2 responses can lead to certain immune-mediated diseases. Thus, it is important to understand how Th1 and Th2 cells are gen…
GSE2770	14607935	GPL91	34	Th1 and Th2 cells arise from a common precursor cell in response to triggering through the TCR and cytokine receptors for IL-12 or IL-4. This leads to activation of complex signaling pathways, which are not known in detail. Disturbances in the balance between type 1 and type 2 responses can lead to certain immune-mediated diseases. Thus, it is important to understand how Th1 and Th2 cells are gen…
GSE2770	14607935	GPL96	34	Th1 and Th2 cells arise from a common precursor cell in response to triggering through the TCR and cytokine receptors for IL-12 or IL-4. This leads to activation of complex signaling pathways, which are not known in detail. Disturbances in the balance between type 1 and type 2 responses can lead to certain immune-mediated diseases. Thus, it is important to understand how Th1 and Th2 cells are gen…
GSE2779	16076868	GPL96	28	Early, low risk IPSS (International Prognostic Scoring System) myelodysplasia (MDS) is a heterogeneous disorder where the molecular and cellular haematopoietic defects are poorly understood. To gain insight into this condition, we analyzed gene expression profiles of marrow CD34+ progenitor cells from normal karyotype, low blast count MDS patients, age-matched controls and patients with non-MDS a…
GSE2788	17301810	GPL339	14	A microarray study of altered gene expression in acute myeloid leukemia cell lines
GSE280	12915738	GPL75	21	Immature, ovariectomized C57BL/6 mice were treated with sesame oil (vehicle) or with 0.1 mg/kg 17-alpha-ethynylestradiol (EE) for the length of time indicated. Mice received one dose, except for the 3x24hr samples, which received 3 consecutive daily doses and were sacrificed 24hr after the final dose. Two replicates of each sample are provided. In addition, one time=0 sample is included.Keywords …
GSE2803	16204629	GPL91	39	PMNs were isolated from venous blood of healthy individuals in accordance with a protocol approved by the Institutional Review Board for Human Subjects, National Institute of Allergy and Infectious Diseases. Human PMNs (107) were cultured in RPMI/H -/+ 100 ng/ml GM-CSF at 37oC and 5% CO2 for up to 24 h as indicated. At the indicated time points, tissue culture medium was aspirated from each well …
GSE281	12391344	GPL91	12	Molecular profiles of muscle tissue in patients with inflammatory myopathies
GSE2812	16120747	GPL81	20	Pregnant C57Bl6N mice were treated with 0 (corn oil), 1.5, 3.0, or 6.0 ug/kg TCDD on gd14.5. Fetal hearts were collected on gd17.5. Hearts from each litter were pooled onto one chip. 4 replicates of each condition were run on affymetrix MG_U74Av2 chips, using standard affymetrix protocols and controls.
GSE2817	17140431	GPL570	30	Genetic and epigenetic processes result in gene expression changes through alteration of the chromatin structure. The relative position of genes on chromosomes has therefore important functional implications and can be exploited to model microarray datasets. Gliomas are the most frequent primary brain tumours in adults and their prognosis is related to histology and grade. In oligodendrogliomas, …
GSE2822	16023359	GPL91	19	Cultured epidermal keratinocytes treated with OsM 1, 4, 24 & 48hrs, and Skinethic epidermal substitutes treated 1, 4, 24, 48h & 7days, each with untreated control
GSE2825	16097792	GPL341	12	Idiosyncratic drug reactions (IDRs) cause significant morbidity and mortality. In an animal model of IDRs, 50-80% of Brown Norway rats exposed to D-penicillamine develop an autoimmune syndrome after several weeks of treatment. The symptoms of the IDR are similar to that observed in humans who take D-penicillamine. The mechanism of this reaction is unknown, and no effective biomarkers have been id…
GSE2835	16249480	GPL96	12	Purpose. How vitamin A contributes to the maintenance of the wet-surfaced phenotype at the ocular surface is not well understood. We sought to identify vitamin A responsive genes in ocular surface epithelia using gene microarray analysis of cultures of a human conjunctival epithelial cell line (HCjE) grown with all-trans-retinoic acid (RA). The analysis showed that the membrane-associated mucin M…
GSE284	12793764	GPL85	10	Analysis of gene expression in skin of rats subjected to electron irradiation and the effect of vitamin A supplements.
GSE2841	16103922	GPL96	76	Pheochromocytomas are neural crest-derived tumors that arise from inherited or sporadic mutations in at least six independent genes: RET, VHL, NF1, and subunits B, C and D of succinate dehydrogenase (SDH). The proteins encoded by these multiple genes regulate distinct functions. To identify molecular interactions between the distinct pathways we performed expression profiling of a large cohort of…
GSE2842	16293608	GPL570	45	Glucocorticoids (GC) are in most chemotherapy protocols for lymphoid malignancies, particularly childhood acute lymphoblastic leukaemia (ALL) for their ability to induce apoptosis in malignant blast. The underlying mechanism, however, has so far only been investigated in model systems. This study comprises Affymetrix hgu133 plus 2.0 analyses ofPeripheral blood lymphoblasts purified at three time …
GSE2852	16251485	GPL85	67	Ochratoxin A gene expression profiling in liver and kidney, with time points of exposure from 7 days to 12 motnhs
GSE2853	16081524	GPL91	23	Liver gene expression was examined in male cynomolgus monkeys treated with ciprofibrate (PPAR-alpha agonist) for 4 days at 400 mg/kg/day and treated for 15 days at 0, 3, 30, 150 or 400 mg/kg/day. The untreated control group were given only the vehicle (0.5% hydroxypropyl methylcellulose). Two animals per group were used for the 4 day treatment and four animals per group were used for the 15 day t…
GSE2866	16601881	GPL81	18	Succinate semialdehyde dehydrogenase (SSADH) deficiency is a rare autosomal recessive disorder effecting approximately 350 people around the world. Patients suffering from SSADH deficiency experience language acquisition failure, memory deficiencies, autism, increased aggressive behaviors, and seizures. There is a chemical buildup of both gamma-aminobutyric acid (GABA) and gamma-hydroxybutyric ac…
GSE2867	-	GPL339	20	A number of human neurodegenerative diseases result from the expansion of a glutamine repeat within the disease-causing protein. Spinocerebellar ataxia type1 is one such disease, caused by expansion of a polyglutamine tract in the novel protein ataxin-1. To faithfully model SCA1 in the mouse, we generated knock-in mice carrying 154 CAG repeats in the mouse Sca1 locus. These mice reproduced many a…
GSE2868	-	GPL85	16	It is well known that many genes are expressed in the retina where they show a clear daily pattern of expression. Although several studies have investigated gene expression in the retina, no study â so far - has investigated the daily and the circadian pattern of gene expression using microarray. In the present study we propose to investigate the daily and circadian pattern of expression in the…
GSE2870	-	GPL1355	18	Prolonged stress has adverse consequences for neurons in the hippocampus (HIPP). The amygdala (AMY) is a brain region that is similar to HIPP across many measures, suggesting that chronic stress might modulate AMY and HIPP function in similar ways. However, studies addressing this issue have produced surprising results. For example, a regimen of chronic stress shown to produce atrophy in HIPP neu…
GSE2871	-	GPL85	47	Traumatic brain injury (TBI) induces a complex cascade of molecular and physiological effects. This study proposes to investigate the gene expression profile in cortex and hippocampus over early time points, following two different injury severities. These results will complement prior knowledge of both metabolic and neuroplastic changes after TBI, as well as serve as a starting point to investig…
GSE2872	-	GPL1355	12	Neurological diseases disrupt the quality of the lives of patients and often lead to their death prematurely. A common feature of most neurological diseases is the degeneration of neurons, which results from an inappropriate activation of apoptosis. Drugs that inhibit neuronal apoptosis could thus be candidates for therapeutic intervention in neurodegenerative disorders. We have identified (and r…
GSE2874	-	GPL341	40	The adult somatosensory cortex undergoes reorganization in response to changes in peripheral input, such as limb usage patterns or denervation/amputation. This reorganization underlies important phenomena, such as phantom pain, recovery after stroke, and certain forms of learning. Although cellular processes, such as LTP, receptor regulation, axonal growth and synaptic formation have been theoriz…
GSE2880	-	GPL1355	62	Epilepsy is a major neurological disorder that affects approximately 1% of the population. The processes that lead to the development of epilepsy (epileptogenesis) are largely unknown. Levetiracetam is a novel antiepileptic drug (AED) that in the kindling model inhibits epileptogenesis in addition to being effective in controlling established epilepsy. The mechanisms of action of levetiracetam as…
GSE2882	16369481	GPL339	42	The mammalian forebrain is a tissue of stunning complexity comprised of numerous regions each containing many distinct cell types that differ in their intrinsic and synaptic physiology, morphology and connectivity. These differences are likely conferred by differential gene expression, but the extent and nature of cell type specific gene expression is largely unknown. Here, we carried out microar…
GSE2884	-	GPL85	12	DRG samples were extracted at 28 and 50 days from L5 spinal nerve ligated rats and sham operated rats. Samples were pooled for each time point per group and hybridised to duplicate to RG_u34 genchips (A, B and C chips).
GSE2884	-	GPL86	12	DRG samples were extracted at 28 and 50 days from L5 spinal nerve ligated rats and sham operated rats. Samples were pooled for each time point per group and hybridised to duplicate to RG_u34 genchips (A, B and C chips).
GSE2884	-	GPL87	12	DRG samples were extracted at 28 and 50 days from L5 spinal nerve ligated rats and sham operated rats. Samples were pooled for each time point per group and hybridised to duplicate to RG_u34 genchips (A, B and C chips).
GSE2888	-	GPL96	28	The use of peripheral blood mononuclear cells (PBMC) for transcriptome analysis has already been proven valuable for assessing disease-associated and drug response related gene signatures. While these proof-of-principle studies have been critically important, the instability of RNA within PBMC prohibits their use in large scale multi-center trials for which samples have to be transported for a pr…
GSE2889	16484547	GPL339	14	Compared the effects of Estrogen and its analog Genistein on mouse thymus. Endogenous estrogen were minimized by removal of ovaries. Samples were collected at 4 time points: 0 days, 2 days, 3 days and 6 days from the start of the treatment. Two biological replicates at each time point.
GSE2899	12606510	GPL81	16	Obesity is a strong risk factor for the development of type 2 diabetes. We have previously reported that in adipose tissue of obese (ob/ob) mice, the expression of adipogenic genes is decreased. When made genetically obese, the BTBR mouse strain is diabetes susceptible and the C57BL/6J (B6) strain is diabetes resistant. We used DNA microarrays and RT-PCR to compare the gene expression in BTBR-ob/…
GSE2912	16129847	GPL96	50	PURPOSE. The deregulation of CCND1, CCND2 and CCND3 genes represents a common event in multiple myeloma (MM). The recently proposed TC classification grouped MM patients into five classes on the basis of their cyclins D expression profiles and the presence of the main translocations involving the immunoglobulin heavy-chain locus (IGH) at 14q32. In this study, we provide a molecular characterizati…
GSE2917	16303873	GPL81	22	Vagal afferent neurons are thought to convey primarily physiological information, whereas spinal afferents transmit noxious signals from the viscera to the central nervous system. In order to elucidate molecular identities for these different properties, we compared gene expression profiles of neurons located in nodose ganglia (NG) and dorsal root ganglia (DRG) in mice. Intraperitoneal administra…
GSE2917	16303873	GPL1261	20	Vagal afferent neurons are thought to convey primarily physiological information, whereas spinal afferents transmit noxious signals from the viscera to the central nervous system. In order to elucidate molecular identities for these different properties, we compared gene expression profiles of neurons located in nodose ganglia (NG) and dorsal root ganglia (DRG) in mice. Intraperitoneal administra…
GSE2924	-	GPL1261	13	During the course of infection, T cells are confronted with a multitude of non self epitopes but only respond to a few epitopes and neglect other potentially immunogenic peptides. Restriction of T cell responses to a small number of selected epitopes (immunodominance) is a central feature of immune responses. Immunodominance is considered to be disadvantageous to the host because it allows pathog…
GSE2926	12177411	GPL32	10	Loss of stearoyl-CoA desaturase-1 function protects mice against adiposity.Ntambi JM, Miyazaki M, Stoehr JP, Lan H, Kendziorski CM, Yandell BS, Song Y, Cohen P, Friedman JM, Attie AD.Department of Biochemistry, University of Wisconsin, Madison, WI 53706, USA. ntambi@biochem.wisc.eduStearoyl-CoA desaturase (SCD) is a central lipogenic enzyme catalyzing the synthesis of monounsaturated fatty acids,…
GSE2950	16377760	GPL339	64	Sulfur mustard (SM) is a potent alkylating agent. We are developing medical countermeasures to reduce the injury caused by SM exposure. Screening in the mouse ear vesicant model has identified three effective compounds: dimercaprol (British anti-lewisite), indomethacin, and octyl homovanillamide (OHV). To identify gene expression changes that correlate with compound efficacy we used oligonucleoti…
GSE2950	16377760	GPL340	43	Sulfur mustard (SM) is a potent alkylating agent. We are developing medical countermeasures to reduce the injury caused by SM exposure. Screening in the mouse ear vesicant model has identified three effective compounds: dimercaprol (British anti-lewisite), indomethacin, and octyl homovanillamide (OHV). To identify gene expression changes that correlate with compound efficacy we used oligonucleoti…
GSE2952	11027337	GPL75	11	The expression of adipogenic genes is decreased in obesity and diabetes mellitus Samuel T. Nadler*, Jonathan P. Stoehr*, Kathryn L. Schueler*, Gene Tanimoto, Brian S. Yandell, and Alan D. Attie*,Â§ Departments of * Biochemistry, and Statistics and Horticulture, University of Wisconsin, Madison, WI, 53706; and Affymetrix, Inc., Santa Clara, CA 95051 Communicated by Neal L. First, University of Wis…
GSE2952	11027337	GPL76	11	The expression of adipogenic genes is decreased in obesity and diabetes mellitus Samuel T. Nadler*, Jonathan P. Stoehr*, Kathryn L. Schueler*, Gene Tanimoto, Brian S. Yandell, and Alan D. Attie*,Â§ Departments of * Biochemistry, and Statistics and Horticulture, University of Wisconsin, Madison, WI, 53706; and Affymetrix, Inc., Santa Clara, CA 95051 Communicated by Neal L. First, University of Wis…
GSE2964	16357179	GPL570	18	We report the effect of motexafin gadolinium (MGd) and exogenous zinc on intracellular levels of free zinc, oxidative stress, proliferation, cell cycle, and cell death in exponential phase human B-cell lymphoma and other hematologic cell lines. We find that increased levels of oxidative stress and intracellular free zinc precede and correlate with cell cycle arrest and apoptotic response. Treatme…
GSE2972	17394647	GPL339	33	An 11-point time course study comparing R1 embryonic stem cells versus embryoid bodies. Time course 0 hours, 6 hours, 12 hours, 18 hours, 24 hours, 36 hours, 48 hours, 4 days, 7 days, 9 days, and 14 days.
GSE2972	17394647	GPL340	33	An 11-point time course study comparing R1 embryonic stem cells versus embryoid bodies. Time course 0 hours, 6 hours, 12 hours, 18 hours, 24 hours, 36 hours, 48 hours, 4 days, 7 days, 9 days, and 14 days.
GSE2973	16352694	GPL339	37	BMDM from BAL/c and C57BL/6 BMDM were stimlated with IFN-g overnight and infected with different Yersinia strains for 3 hrs.
GSE2990	16478745	GPL96	189	Background: Histologic grade in breast cancer provides clinically important prognostic information. However, 30%-60% of tumors are classified as histologic grade 2. This grade is associated with an intermediate risk of recurrence and is thus not informative for clinical decision making. We examined whether histologic grade was associated with gene expression profi les of breast cancers and whethe…
GSE3004	15618462	GPL91	10	Allergen exposure induces the airway epithelium to produce chemoattractants, proallergic interleukins, matrix-modifying proteins, and proteins that influence the growth and activation state of airway structural cells. These proteins, in turn, contribute to the influx of inflammatory cells and changes in structure that characterize the asthmatic airway. To use the response of the airway epithelium…
GSE3013	16355216	GPL91	18	The molecular explanation for tamoxifen serving as a breast cancer treatment but displaying partial estrogenic in the uterus is not known. Previously, we reported that differential promoter context and cofactor recruitment contribute to the tissue specificity of tamoxifen. Here, we investigated the genomic basis for the partial oestrogenic activity of tamoxifen in the endometrium. We showed that …
GSE3016	16076954	GPL88	63	By using high-density oligonucleotide arrays, we profiled gene expression in reward-related brain regions of rats that developed escalated cocaine intake after extended access to cocaine (6 h per day). Rats allowed restricted daily access to cocaine (only 1 h) that displayed a stable level of cocaine intake and cocaine naive rats were used for controls. Four analysis methods were compared: Affyme…
GSE3026	16403844	GPL91	73	Peripheral blood mononuclear cells were isolated 0, 30 min, 6 h, 24 h, and 7 day after intravenous endotoxin challenge.
GSE3037	-	GPL96	24	Peripheral blood neutrophils were isolated from septic patients and treated in vitro with LPS or HMGB1
GSE3039	16623764	GPL81	16	Three innate (B1-B, NKT, CD8aaT cells) and adaptive (B2-B, CD4T, CD8abT cells) cell-types were sorted by FACS. Three biological replicates for NKT, CD4T, CD8aaT, CD8abT cells and two biological replicates for B1 and B2 cells were generated and the expression profiles were determined using Affymetrix Mu74Av2 chip. Comparisons between the sample groups allow the identification of genes differential…
GSE3040	16319822	GPL96	12	Prolonged use of glucocorticoids can lead to the formation of a cataract, however the mechanism is not known. We recently reported the presence of the functional glucocorticoid receptor in immortalized cultured mammalian lens epithelial cells (Gupta & Wagner, Invest Ophthalmol Vis Sci 2003), but the short term biological effect of glucocorticoid action in lens epithelial cells is not known. This …
GSE3058	16682506	GPL201	10	Investigation of Gene Expression Profiling in Unstaged Head Hair Follicles Plucked from Men and Women
GSE3059	16806233	GPL570	32	Background---For decades, plasma lipid levels have been known risk factors of atherosclerosis. Recently, inflammation has gained acceptance as a crucial event in the pathogenesis and development of atherosclerosis. A number of studies have provided some insights into the relationships between the two aspects of atherosclerosis: plasma lipids --- the risk factors, and circulating leukocytes --- th…
GSE3062	16776839	GPL570	12	Affymetrix U133 Plus 2.0 arrays were hybridized with varying amounts of starting material to determine whether different measurements of gene expression were observed.
GSE3067	16985257	GPL1261	28	In this study we used the d337T TRb transgenic mouse that has been created to reproduce the human genetic disease known as resistance to thyroid hormone (RTH) as a model to determine if the d337T TRb mutation would have an effect on PPARa activation. A single amino acid deletion (d337T) abrogates thyroid hormone (T3) binding and transforms the thyroid hormone receptor (TRb) into a constitutive re…
GSE3068	16684804	GPL85	20	RNA was obtained from rear leg muscle of normal and diabetic rats in the presence and absence of oral treatment with vandyl sulfate. Diabetes was induced with streptozotocin and expression profiles were determined using Affymetrix Rat Genechip U34A. The effect of treatment and disease on gene expression was examined.
GSE3077	16237126	GPL570	12	The growth in popularity of RNA expression microarrays has been accompanied by concerns about the reliability of the data especially when comparing between different platforms. Here we present an evaluation of the reproducibility of microarray results using two platforms, Affymetrix GeneChips and Illumina BeadArrays. The study design is based on a dilution series of two human tissues (blood and p…
GSE3078	-	GPL339	20	In muscle, reactive oxygen species (ROS) generation increases with strenuous activity, chronic unloading, and inflammatory stimuli; skeletal muscle function is very sensitive to ROS; and there are redox-sensitive signaling pathways. Using myogenic cell cultures, we asked whether hydrogen peroxide (H2O2) induces adaptive changes in skeletal muscle gene expression. H2O2 downregulated or failed to i…
GSE3079	-	GPL76	34	MRP14 is tissue-specific expressed only in granulocytes, monocytes and in inflammation-activated keratinocytes. Its existence in the early phase of inflammation may be a hint towards a participation in immune response. Intra- and extracellular functions have been described yet. An antibacterial effect is caused by chelation of zinc, which then cannot be used for bacterial growth. The experiments …
GSE3079	-	GPL75	34	MRP14 is tissue-specific expressed only in granulocytes, monocytes and in inflammation-activated keratinocytes. Its existence in the early phase of inflammation may be a hint towards a participation in immune response. Intra- and extracellular functions have been described yet. An antibacterial effect is caused by chelation of zinc, which then cannot be used for bacterial growth. The experiments …
GSE3100	16614460	GPL1261	23	Gene expression profiling with microarrays was used to identify genes differentially expressed in the lungs of B6 and BALB CF mice compared to non-CF littermates
GSE3110	16432224	GPL1355	10	The hypothalamic paraventricular (PVN) and supraoptic (SON) nuclei are important integrative structures that regulate co-ordinated responses to perturbations in cardiovascular homeostasis. Through descending projections from parvocellular neurons to the brainstem, the PVN acts as an autonomic 'premotor nucleus', regulating reflex changes in sympathetic nerve activity that are involved in blood pr…
GSE3111	16432224	GPL1355	10	The hypothalamic paraventricular (PVN) and supraoptic (SON) nuclei are important integrative structures that regulate co-ordinated responses to perturbations in cardiovascular homeostasis. Through descending projections from parvocellular neurons to the brainstem, the PVN acts as an autonomic 'premotor nucleus', regulating reflex changes in sympathetic nerve activity that are involved in blood pr…
GSE3112	16344523	GPL96	40	Microarray data from muscle biopsy specimens from subjects with inclusion body myositis, polymyositis, and normals
GSE3113	17017123	GPL96	15	A stably transfected inducible system for KLF4 was established in RKO cells as previously described (Chen et al., 2001; Chen et al., 2003). This cell line, called EcR-RKO/KLF4, contains stably transfected receptors for the insect hormone, ecdysone (EcR), and a full-length mouse KLF4 cDNA driven by a promoter that responds to ecdysone and its analogue, ponasterone A. Cells were treated with 5 ÂµM …
GSE3115	-	GPL91	23	The aim of the project was to explore the feasibility of gene expression profiles as a general diagnostic tool. Therefore the most frequently used and easy to use white blood cells have been profiled. We wanted to examinate, whether phenotypes created by organs different from blood cells have enough influence on these cells to allow the diagnosis of their presence. As a proof of principle we trie…
GSE3125	16432224	GPL1355	10	The hypothalamic paraventricular (PVN) and supraoptic (SON) nuclei are important integrative structures that regulate co-ordinated responses to perturbations in cardiovascular homeostasis. Through descending projections from parvocellular neurons to the brainstem, the PVN acts as an autonomic 'premotor nucleus', regulating reflex changes in sympathetic nerve activity that are involved in blood pr…
GSE3129	-	GPL81	14	To compare and contrast genetic signatures from livers of young and aged Snell dwarf mice with their wild type controls.SUBMITTER_CITATION: W. H. Boylston, James H. DeFord, John Papaconstantinou (2006) Identification of longevity-associated genes in long-lived Snell and Ames dwarf mice Age 28:125-144
GSE3140	-	GPL201	12	Neonatal gram-negative sepsis is often characterized by a fulminat clinical course compared to adults resulting in higher morbidity and mortality. Genome-wide gene expression analysis can provide insights into the molecular alterations in sepsis. To evaluate in vitro activation of the neonatal and adult immune system, gene expression patterns were compared in mononuclear cells from cord (CBMNC) a…
GSE3141	16273092	GPL570	111	Signatures of Oncogenic Pathway Deregulation in Human Cancers.The ability to define cancer subtypes, recurrence of disease, and response to specific therapies using DNA microarray-based gene expression signatures has been demonstrated in multiple studies. Such data is also of substantial importance to the analysis of cellular signaling pathways central to the oncogenic process. With this focus, w…
GSE3142	16162033	GPL339	10	Hair follicle matrix, outer root sheath, dermal papilla cells and melanocytes and a dermal fraction enriched in fibroblasts were FACS isolated from 4d backskins. Targets from two biological replicates of each were generated and the expression profiles were determined using Affymetrix Mouse Genechip 430A arrays. Comparisons between the sample groups allow the identification of cell-type specific g…
GSE3143	16273092	GPL91	158	Signatures of Oncogenic Pathway Deregulation in Human Cancers.The ability to define cancer subtypes, recurrence of disease, and response to specific therapies using DNA microarray-based gene expression signatures has been demonstrated in multiple studies. Such data is also of substantial importance to the analysis of cellular signaling pathways central to the oncogenic process. With this focus, w…
GSE3149	16273092	GPL96	153	Signatures of Oncogenic Pathway Deregulation in Human Cancers.The ability to define cancer subtypes, recurrence of disease, and response to specific therapies using DNA microarray-based gene expression signatures has been demonstrated in multiple studies. Such data is also of substantial importance to the analysis of cellular signaling pathways central to the oncogenic process. With this focus, w…
GSE3150	-	GPL1261	31	To compare and contrast genetic signatures from livers of young and aged Ames dwarf mice with their wild type controls.SUBMITTER_CITATION: W. H. Boylston, James H. DeFord, John Papaconstantinou (2006) Identification of longevity-associated genes in long-lived Snell and Ames dwarf mice Age 28:125-144
GSE3151	16273092	GPL570	55	Signatures of Oncogenic Pathway Deregulation in Human CancersThe ability to define cancer subtypes, recurrence of disease, and response to specific therapies using DNA microarray-based gene expression signatures has been demonstrated in multiple studies. Such data is also of substantial importance to the analysis of cellular signaling pathways central to the oncogenic process. With this focus, we…
GSE3156	16273092	GPL570	19	Gene expression analysis on growing breast cancer cell lines.
GSE3158	16273092	GPL76	28	previously published mouse dataPubmed IDS: 12754511, 12839964
GSE3158	16273092	GPL75	28	previously published mouse dataPubmed IDS: 12754511, 12839964
GSE3162	16061799	GPL81	10	Rho GTPases integrate control of cell structure and adhesion with downstream signaling events. In keratinocytes, RhoA is activated at early times of differentiation and plays an essential function in establishment of cell-cell adhesion. We report here that, surprisingly, Rho signaling suppresses downstream gene expression events associated with differentiation. Similar inhibitory effects are exer…
GSE3167	15173019	GPL96	60	The presence of carcinoma in situ (CIS) lesions in the urinary bladder is associated with a high risk of disease progression to a muscle invasive stage. In this study, we used microarray expression profiling to examine the gene expression patterns in superficial transitional cell carcinoma (sTCC) with surrounding CIS (13 patients), without surrounding CIS lesions (15 patients), and in muscle inva…
GSE3172	17027060	GPL76	12	The innate immune response to 1st generation adenoviral vectors was ascertained through high level infection of primary cells from a inbred mouse strain, replete with an intact and functioning TLR system.
GSE3172	17027060	GPL75	12	The innate immune response to 1st generation adenoviral vectors was ascertained through high level infection of primary cells from a inbred mouse strain, replete with an intact and functioning TLR system.
GSE3183	-	GPL96	15	The purpose of this project is to gain a better understanding of the early cytokine-mediated mechanisms that lead to asthma.
GSE3184	-	GPL339	40	This project investigates the mechanisms that underlie asthma-related phenotypes associated with allergen exposure. See http://www.hopkins-genomics.org/asthma/asthma006/index.htmlThe goal of the experiment was to identify genes that change their levels of expression as a consequence of challenge with allergen. The experiments utilized a murine model of human asthma that employed BALB/CJ mice. In …
GSE3185	-	GPL91	17	Summary: Astrocytomas can be categorized as either low grade or high grade (glioblastoma). Low grade astrocytomas are not generally aggressive tumors whereas glioblastomas are and in turn have a high mortality rate. The purpose of this experiment is to identify genetic differences between the two types.Hypothesis: There will be a difference in RNA expression between high grade and low grade tumor…
GSE3188	16565084	GPL570	12	The response of cells to hypoxia is characterised by co-ordinated regulation of many genes. Studies of the regulation of the expression of many of these genes by oxygen has implicated a role for the heterodimeric transcription factor hypoxia inducible factor (HIF). The mechanism of oxygen sensing which controls this heterodimeric factor is via oxygen dependent prolyl and asparaginyl hydroxylation…
GSE3189	16243793	GPL96	70	A number of melanoma specific genes were identified to differentiate clinical relevant tissue samples containing benign from malignant melanocytes.
GSE3196	16237459	GPL1261	12	The CH1 protein interaction domain of the transcriptional coactivators p300 and CBP is thought to interact with HIF-1alpha and this interaction is thought to be critical to the expression of HIF-1alpha target genes in response to hypoxia. To test the requirement of the CH1 domain for gene expression in response to hypoxia, rimary mouse embryonic fibroblasts (MEFs) were generated from C57Bl/6x129/…
GSE3202	16551867	GPL570	23	In this experiments different treatments were applied to lung cancer cell lines1)H720 cell line suspension was treated by 1 micromole of 5-lipoxygenase activating protein inhibitor MK886 serum-free in TIS medium for 24 h.2) A549 cell line was treated as H720 by MK8863) A549 was treated by 100 nM of silencing cocktail (siRNA) prepared against the 4-th exon of the gene and generated by RNASEIII dig…
GSE3203	17237394	GPL1261	16	Influenza virus infection-induced gene expression changes of regional B cells are mediated at least in part through type I Interferon:Our objective is to determine whether the influenza virus-infection induced gene expression changes in regional lymph node B cells are facilitated at least in part through type I interferon. Our specific aim is to compare the gene expression profile of highly FACS-…
GSE3204	16354201	GPL96	16	Cultured skin substitutes, prepared using keratinocytes, fibroblasts and biopolymers, can facilitate closure of massive burn wounds by increasing the availability of autologous tissue for grafting. However, because they contain only two cell types, skin substitutes cannot replace all of the functions of native human skin. To better understand the physiological and molecular differences between cu…
GSE3212	16520944	GPL80	10	Cigarette smoking is the leading cause of the respiratory diseases collectively known as chronic obstructive pulmonary disease (COPD). While the pathogenesis of COPD is complex, there is abundant evidence that alveolar macrophages (AM) play an important role. Based on the concept that COPD is a slow-progressing disorder likely involving multiple mediators released by AM activated by cigarette smo…
GSE3215	16923994	GPL341	10	Inrauterine growth restriction was induced by chronic hyper insulinemia in pregnant rats and differential gene expression was studied using affymetrix rat genome RAE230A.Data was analysed using SAM.
GSE3216	16868071	GPL339	14	Genes encoding transcription factors function as hubs in gene regulatory networks because they encode DNA-binding proteins, which bind to promoters that carry their binding sites. In the present work we have studied gene regulatory networks defined by genes with transcripts belonging to different mRNA abundance classes in the small intestinal epithelial cell. The focus is the rewiring that occurs…
GSE3218	16424014	GPL96	107	Expression profiling of a panel of 101 adult male germ cell tumors and 5 normal testis specimens was performed on Affymetrix U133A and U133B microarrays. This data has been used to:1) generate a gene classifier that predicts histology (see PMID 15870693).SUBMITTED STUDIES:2) identify candidate target genes on 12p, a region that is gained in almost 100% of germ cell tumors3) identify pluripotency …
GSE3218	16424014	GPL97	107	Expression profiling of a panel of 101 adult male germ cell tumors and 5 normal testis specimens was performed on Affymetrix U133A and U133B microarrays. This data has been used to:1) generate a gene classifier that predicts histology (see PMID 15870693).SUBMITTED STUDIES:2) identify candidate target genes on 12p, a region that is gained in almost 100% of germ cell tumors3) identify pluripotency …
GSE3231	17394647	GPL340	33	An 11-point time course study comparing V6.5 embryonic stem cells versus embryoid bodies. Time course 0 hours, 6 hours, 12 hours, 18 hours, 24 hours, 36 hours, 48 hours, 4 days, 7 days, 9 days, and 14 days.
GSE3231	17394647	GPL339	33	An 11-point time course study comparing V6.5 embryonic stem cells versus embryoid bodies. Time course 0 hours, 6 hours, 12 hours, 18 hours, 24 hours, 36 hours, 48 hours, 4 days, 7 days, 9 days, and 14 days.
GSE3234	-	GPL340	16	Gene expression profiles of sorted bone marrow samples to determine genes implicated in hematopoetic stem cell identity.
GSE3234	-	GPL339	16	Gene expression profiles of sorted bone marrow samples to determine genes implicated in hematopoetic stem cell identity.
GSE3241	-	GPL339	11	Sca1-CD45 sorted bone marrow
GSE3241	-	GPL340	11	Sca1-CD45 sorted bone marrow
GSE3245	16275751	GPL81	12	Gene expression changes induced by MyoD or Myf5 were examined in a double-knockout fibroblast cell line lacking endogenous functional myoD or myf5 genes. Use of this cell line precluded the possibility of auto- or cross-activation of endogenous myoD or myf5. Myogenin or hrGFP were expressed in parallel samples as controls. Following infection with retrovirus - expressing the relevant myogenic reg…
GSE3248	16183657	GPL81	48	To dissect the impact of nuclear and extranuclear mutant htt on the initiation and progression of disease, we generated a series of transgenic mouse lines in which nuclear localization (NLS) or nuclear export sequences (NES) have been placed N-terminal to the htt exon 1 protein carrying 144 glutamines. Our data indicate that the exon 1 mutant protein is present in the nucleus as part of an oligom…
GSE3249	17012256	GPL1261	18	To characterize gene response in RPE65-/- mouse model of Leberâs congenital amaurosis during progression of the disease, we analyzed differential gene expression in retinae early in the development of the disease, namely before and at the onset of photoreceptor cell death in knock-out mice of 2, 4 and 6 months of age.
GSE3253	15919760	GPL1261	12	Acute cognitive impairment (i.e., delirium) is common in elderly emergency department patients and frequently results from infections that are unrelated to the central nervous system. Sinceactivation of the peripheral innate immune system induces brain microglia to produce inflammatory cytokines that are responsible for behavioral deficits, we investigated if aging exacerbated neuroinflammation a…
GSE3254	16645204	GPL91	20	Considerable variation in gene expression data from different DNA microarray platforms has been demonstrated. However, no characterization of the source of variation arising from labeling protocols has been performed. To analyze the variation associated with T7-based RNA amplification/labeling methods, aliquots of the Stratagene Human Universal Reference RNA were labeled using 3 eukaryotic target…
GSE3260	-	GPL81	19	This study was performed to identify genes that are regulated following iFGFR1 activation in mammary glands from MMTV-iFGFR1 transgenic mice.
GSE3268	16188928	GPL96	10	Gene expression profile of squamous lung cancer cells are used to identify genes that are differentially regulated.
GSE3284	16136080	GPL96	46	Oligonucleotide and complementary DNA microarrays are being used to subclassify histologically similar tumours, monitor disease progress, and individualize treatment regimens. However, extracting new biological insight from high-throughput genomic studies of human diseases is a challenge, limited by difficulties in recognizing and evaluating relevant biological processes from huge quantities of e…
GSE3284	16136080	GPL570	18	Oligonucleotide and complementary DNA microarrays are being used to subclassify histologically similar tumours, monitor disease progress, and individualize treatment regimens. However, extracting new biological insight from high-throughput genomic studies of human diseases is a challenge, limited by difficulties in recognizing and evaluating relevant biological processes from huge quantities of e…
GSE3284	16136080	GPL97	46	Oligonucleotide and complementary DNA microarrays are being used to subclassify histologically similar tumours, monitor disease progress, and individualize treatment regimens. However, extracting new biological insight from high-throughput genomic studies of human diseases is a challenge, limited by difficulties in recognizing and evaluating relevant biological processes from huge quantities of e…
GSE3292	16943533	GPL570	36	Introduction: Human Papilloma Virus (HPV) is associated with a subset of head and neck squamous cell carcinoma (HNSCC), between 15% and 35% of HNSCC harboring HPV, almost exclusively of subtype 16. Demographic and exposure differences between HPV-positive (+) and negative (-) HNSCCs suggest that HPV(+) tumors may constitute a subclass with different biology, while clinical differences have also b…
GSE3296	16237459	GPL1261	16	The CH1 protein interaction domain of the transcriptional coactivators p300 and CBP is thought to interact with HIF-1alpha and this interaction is thought to be critical to the expression of HIF-1alpha target genes in response to hypoxia. Trichostatin A (TSA), an inhibitor of histone deacetylases, has been reported to repress the expression of HIF-1alpha target genes. To test the requirement of t…
GSE3297	16278587	GPL96	12	We compared gene expression profiles from six donor kidneys prior to surgical manipulation to six kidneys removed after laparoscopic donor nephrectomy (LDN) and several hours of CO2 pneumoperitoneum. Biopsies were obtained from renal cortex and hybridized to Affymetrix HG-U133A GeneChips. For control kidneys we identified 1380 genes present on all 6 samples that had a signal intensity greater tha…
GSE3298	17398174	GPL1355	16	Mid-shaft fracture stimulates bone lengthening by increasing linear growth at the growthplate. This project studied changes in mRNA in the proximal growthplate after a mid-shaft fracture in a rat model.
GSE3305	-	GPL341	18	Some of the most common neurodegenerative disorders have a strong association with aging. Curiously, these conditions tend to involve specific areas of the central and peripheral nervous system, at least initially. For example, amyotrophic lateral sclerosis preferentially targets spinal motor neurons and spares oculomotor neurons. This suggests that aging has divergent effects on brain stem and s…
GSE3306	16997883	GPL96	10	Studies of human fetal lung in explant culture and in isolated epithelial cells have demonstrated that both glucocorticoids and cyclic AMP promote differentiated alveolar type II cell phenotype as assessed by ultrastructural morphology and surfactant production. This project profiles changes in gene expression associated with hormone induced differentiation. Undifferentiated human fetal lung (13-…
GSE3307	16478798	GPL97	121	Summary: Genetic disorders of muscle cause muscular dystrophy, and are some of the most common inborn errors of metabolism. Muscle also rapidly remodels in response to training and innervation. Muscle weakness and wasting is important in such conditions as aging, critical care medicine, space flight, and diabetes. Finally, muscle can also be used to investigate systemic defects, and the compensat…
GSE3307	16478798	GPL96	121	Summary: Genetic disorders of muscle cause muscular dystrophy, and are some of the most common inborn errors of metabolism. Muscle also rapidly remodels in response to training and innervation. Muscle weakness and wasting is important in such conditions as aging, critical care medicine, space flight, and diabetes. Finally, muscle can also be used to investigate systemic defects, and the compensat…
GSE3308	16297991	GPL96	12	Hepatocyte nuclear factor 1beta (HNF1beta, TCF2) is a tissue-specific transcription factor whose mutation in humans leads to renal cysts, genital malformations, pancreas atrophy and maturity onset diabetes of the young (MODY5). Furthermore, HNF1beta overexpression has been observed in clear cell cancer of the ovary. To identify potential HNF1beta target genes whose activity may be deregulated in …
GSE3309	-	GPL85	24	The fast and constant activity of the extraocular muscles (EOMs) impose mechanical and metabolic stresses not typically seen in limb skeletal muscles. These functional properties may explain why EOMs seem to age at a faster rate than other skeletal muscles. Using high-density cDNA microarrays, this study investigated the gene expression profile of EOMs and extensor digitorum longus muscles (EDL) …
GSE3318	16237459	GPL1261	28	The C-terminal activation domain (C-TAD) of the hypoxia-inducible transcription factors HIF-1? and HIF-2? binds the CH1 domains of the related transcriptional coactivators CREB-binding protein (CBP) and p300, an oxygen-regulated interaction thought to be highly essential for hypoxia-responsive transcription. The role of the CH1 domain in vivo is unknown, however. We created mutant mice bearing de…
GSE3320	17115125	GPL96	11	The earliest morphologic evidence of changes in the airways associated with chronic cigarette smoking is in the small airways. To help understand how smoking modifies small airway structure and function, we developed a strategy using fiberoptic bronchoscopy and brushing to sample the human small airway (10th-12th order) bronchial epithelium to assess gene expression (Affymetrix HG-U133A array) in…
GSE3325	16286247	GPL570	19	An integrative analysis of this compendium of proteomic alterations and transcriptomic data was performed revealing only 48-64% concordance between protein and transcript levels. Importantly, differential proteomic alterations between metastatic and clinically localized prostate cancer that mapped concordantly to gene transcripts served as predictors of clinical outcome in prostate cancer as well…
GSE3327	16244648	GPL81	87	Adult mouse gene expression patterns in common strains
GSE3330	16424919	GPL340	60	Coordinated regulation of gene expression levels across a series of experimental conditions provides valuable information about the functions of correlated transcripts. To map gene regulatory pathways, we used microarray-derived gene expression measurements in 60 individuals of an F2 sample segregating for diabetes. We performed correlation analysis among ~40,000 expression traits. By combining c…
GSE3330	16424919	GPL339	60	Coordinated regulation of gene expression levels across a series of experimental conditions provides valuable information about the functions of correlated transcripts. To map gene regulatory pathways, we used microarray-derived gene expression measurements in 60 individuals of an F2 sample segregating for diabetes. We performed correlation analysis among ~40,000 expression traits. By combining c…
GSE3343	-	GPL339	18	Amyotrophic lateral sclerosis (ALS) spares the ocular motor system. In this study, we tested the hypothesis that the oculomotor neurons are intrinsically protected in ALS. Using high-density cDNA microarrays, we examined the transcriptome of oculomotor nuclei and spinal cords in mice expressing a human mutant SOD1, the SOD1(G93A) ALS model, at 6 and 10 weeks of age. Comparison of gene expression …
GSE3351	16168984	GPL340	20	oocytes were collected from ovary by follicle stage. Targets from four biological replicates of each were generated and the expression profiles were determined using Affymetrix MOE430A and B.
GSE3351	16168984	GPL339	20	oocytes were collected from ovary by follicle stage. Targets from four biological replicates of each were generated and the expression profiles were determined using Affymetrix MOE430A and B.
GSE3365	16436634	GPL96	127	Comparison of PBMC transcriptional profiles in healthy subjects, patients with Crohn's Disease, and patients with Ulcerative Colitis
GSE3383	16882883	GPL339	18	To investigate molecular mechanisms involved in the development of cardiac hypertrophy and heart failure, a tetracycline-regulated transgenic system to conditionally switch a constitutively-active form of the Akt1 protein kinase on or off in the adult heart was developed. Short-term activation (2 weeks) of Akt1 resulted in completely reversible hypertrophy with maintained contractility. In contra…
GSE3383	16882883	GPL340	18	To investigate molecular mechanisms involved in the development of cardiac hypertrophy and heart failure, a tetracycline-regulated transgenic system to conditionally switch a constitutively-active form of the Akt1 protein kinase on or off in the adult heart was developed. Short-term activation (2 weeks) of Akt1 resulted in completely reversible hypertrophy with maintained contractility. In contra…
GSE3384	16877500	GPL81	36	The aim of this study was to investigate the molecular mechanisms implicated in this mouse model of nemaline myopathy, and to further compare the molecular disease response in different skeletal muscles. For this purpose, snap frozen skeletla muscle specimens from wild type and transgenic for alpha tropomyosin slow mice were studied. Five different muscle types were used (diaphragm, plantaris, ex…
GSE339	12816982	GPL81	12	The functional relationships and properties of different sub-types of dendritic cells (DC) remain largely undefined. We used a global gene profiling approach to determine gene expression patterns among murine splenic CD11c high DC subsets in an effort to better characterise these cells.
GSE3397	-	GPL570	12	Human bronchial epithelial cells (BEAS-2B cells) were treated with RSV at 1.0 MOI for 4 and 24 hours or control (vehicle-treated for 4 hours). Global gene expression was measured by Affy Hu133 plus 2.0 microarray chips.
GSE340	-	GPL85	10	The 10 samples below represent a study where gene expression levels were measured in 5 different parts of the rat brain under cocaine-treated (GSM4696, GSM4698 - GSM4701) and saline-treated control (GSM4702 - GSM4706) conditions. The regions studied were amygdala (amy), caudate putamen (cpu), nucleus acumbens (na), prefrontal cortex (cpu), and the ventral tegmental area (vta). The data were analy…
GSE3403	-	GPL341	24	Supporting microarray data for manuscript entitled ""OSTEOPONTIN AND PAI-1 EXPRESSION IN MALIGNANT HYPERTENSION: SUPPRESSION BY p38 MAPK INHIBITORS"" submitted to the HYPERTENSION journal.
GSE3414	16926388	GPL1261	36	The goal of this experiment was to examine the innate immune response to helminth infection in the lung. Hookworms (like many other helminths) use an obligate migration pathway through the lung. Their infection has been characterized in the gut in detail, but early immune responses in the lung have not been fully characterized.
GSE3418	16095496	GPL339	35	Exploration of genes associated with acute and chronic rejection associated with obliterative airway disease
GSE3419	16395407	GPL96	16	The human hair follicle bulge is an important niche for keratinocyte stem cells (KSC). Elucidation of human bulge cell biology could be facilitated by analysis of global gene expression profiles and identification of unique cell surface markers. The lack of distinctive bulge morphology in human hair follicles has hampered studies of bulge cells and KSC. In this study, we determined the distributi…
GSE3420	17636115	GPL85	12	The effects of retinoic acid/vitamin A signal on the transcriptional profile of the ductus arteriosus during development were examined.
GSE3422	-	GPL85	12	The transcriptional profiles of the aorta and the ductus arteriosus during development were compared.
GSE3440	16601137	GPL1261	15	Aldosterone is known to have a number of direct adverse effects on the heart, including fibrosis and myocardial inflammation. However, genetic mechanisms of aldosterone action on the heart remain unclear.This experiment investigated of temporal changes in gene expression profile of the whole heart induced by acute administration of a physiologic dose of aldosterone in the mouse. mRNA levels of 34…
GSE3446	16954472	GPL97	117	Metastatic neuroblastomas lacking amplification of the MYCN proto-oncogene vary in their clinical behavior. Those diagnosed before one year of age are least aggressive and those diagnosed after two years are most aggressive. To improve current risk stratification and gain insight into the biological processes that account for this phenomenon, we analyzed expression profiles from 102 primary untre…
GSE3446	16954472	GPL96	117	Metastatic neuroblastomas lacking amplification of the MYCN proto-oncogene vary in their clinical behavior. Those diagnosed before one year of age are least aggressive and those diagnosed after two years are most aggressive. To improve current risk stratification and gain insight into the biological processes that account for this phenomenon, we analyzed expression profiles from 102 primary untre…
GSE3455	16882882	GPL81	30	Sham and bilateral OBX were performed on wild-type and SR-A mutant mice.Tissue collected 2, 8, 16, and 48 hours following OBX. Expression profiles were determined using Affynetrix MG U74Av2 chips.
GSE3463	16399799	GPL1261	12	Gene expression profiling of FACS sorted GFP+ve cells from sexed gonads of transgenic pSF1-eGFP mice
GSE3467	16365291	GPL570	18	We show that numerous miRNAs are transcriptionally up-regulated in papillary thyroid carcinoma (PTC) tumors compared with unaffected thyroid tissue. Among the predicted target genes of the three most upregulated miRNAs (miRs 221, 222 and 146b), only less than 15% showed significant downexpression in transcript level between tumor and unaffected tissue. The KIT gene which is known to be downregula…
GSE3483	17600112	GPL339	12	(Abstract of publication submitted currently) To clarify molecular regulation of satellite cells, we performed genome-wide gene expression analysis of quiescent satellite cells isolated from mouse skeletal muscle by flow cytometry. We identified 53 novel quiescent satellite cell-specific genes whose expressions are sharply down-regulated upon activation. The gene list contains a number of cell su…
GSE3486	16492137	GPL339	18	In order to test the hypothesis that fibroblasts from different tissues are phenotypically distinct from one another, we have subjected tendon, skin and corneal fibroblasts of fetal mouse to mechanical stimulation by fluid flow and analyzed the transcriptional responses of the cells using Affymetrix MOE430 chip set containing two arrays MOE430A and MOE430B.
GSE3486	16492137	GPL340	18	In order to test the hypothesis that fibroblasts from different tissues are phenotypically distinct from one another, we have subjected tendon, skin and corneal fibroblasts of fetal mouse to mechanical stimulation by fluid flow and analyzed the transcriptional responses of the cells using Affymetrix MOE430 chip set containing two arrays MOE430A and MOE430B.
GSE3489	15579294	GPL91	28	The neurodegenerative process in HIV encephalitis (HIVE) is associated with extensive damage to the dendritic and synaptic structure that often leads to cognitive impairment. Several mechanisms might be at play, including release of neurotoxins, oxidative stress and decreased activity of neurotrophic factors. Furthermore, HIV-mediated dysregulation of genes involved in neuronal maintenance might …
GSE349	12907009	GPL91	14	These patients proved resistant to docetaxel treatment, exhibiting residual tumor of 25% or greater remaining volume.
GSE3491	16081831	GPL91	12	We used an unbiased approach to identify differences in gene expression that may account for the high degree of interindividual variability in inflammatory responses to LPS in the normal human population. We measured LPS-induced cytokine production ex vivo in whole blood from 102 healthy human subjects and identified individuals who consistently showed either very high or very low responses to LP…
GSE3493	16585155	GPL91	46	Biopsy specimens were collected from rectal cancer before starting preoperative radiotherapy.The expression profiles were determined using Affymetrix Human Genome U95 version 2 arrays.Comparison between the sample groups allow to identify a set of discriminating genes that can be used for characterization of responders and nonresponders to preoperative radiotherapy in rectal cancer.
GSE3494	16141321	GPL97	251	The biological tumor samples (ie, breast tumor specimens) consisted of freshly frozen breast tumors from a population-based cohort of 315 women representing 65% of all breast cancers resected in Uppsala County, Sweden, from January 1, 1987 to December 31, 1989. Estrogen receptor status was determined by biochemical assay as part of the routine clinical procedure. An experienced pathologist determ…
GSE3494	16141321	GPL96	251	The biological tumor samples (ie, breast tumor specimens) consisted of freshly frozen breast tumors from a population-based cohort of 315 women representing 65% of all breast cancers resected in Uppsala County, Sweden, from January 1, 1987 to December 31, 1989. Estrogen receptor status was determined by biochemical assay as part of the routine clinical procedure. An experienced pathologist determ…
GSE350	12907009	GPL91	10	These patients were sensitive to docetaxel treatment, exhibiting less than 25% residual tumor.
GSE3512	16720718	GPL1355	10	High fat diet (HF) rodent models have contributed significantly to the dissection of the pathophysiology of the insulin resistance syndrome, but their phenotype varies distinctly between different studies. Here, we have analyzed gene expression patterns in livers of animals fed with different HF with varying fatty acid compositions.
GSE3524	15381369	GPL96	20	There are limited studies attempting to correlate the expression changes in oral squamous cell carcinoma with clinically relevant variables. We determined the gene expression profile of 16 tumor and 4 normal tissues from 16 patients by means of Affymetrix Hu133A GeneChips. The hybridized RNA was isolated from cells obtained with laser capture microdissection, then was amplified and labeled using …
GSE3529	15986123	GPL96	12	Three human ER+ breast cancer cell lines--MCF-7, T47-D, BT-474--grown with or without estradiol (E2).
GSE353	12888627	GPL85	100	Comparison of gene expression in young soleus muscle (3-4 months) with old soleus muscle (30-31 months).
GSE353	12888627	GPL86	98	Comparison of gene expression in young soleus muscle (3-4 months) with old soleus muscle (30-31 months).
GSE353	12888627	GPL87	98	Comparison of gene expression in young soleus muscle (3-4 months) with old soleus muscle (30-31 months).
GSE3530	16368875	GPL1261	36	Three major MAP kinase signaling cascades, ERK, p38 and JNK, play significant roles in the development of cardiac hypertrophy and heart failure in response to external stress and neural/hormonal stimuli. In order to study the specific function of each MAP kinase branch in adult heart, we have generated three transgenic mouse models with cardiac specific and temporally regulated expression of acti…
GSE3531	16829144	GPL85	79	The aim of this study was to investigate whether the differences in memory decline associated with aging are a result of differences in gene expression. We first categorized age-unimpaired and age-impaired rats based on their performance in the Morris Water Maze and then isolated messenger RNA from the CA1 hippocampal region of each animal to interrogate Affymetrix microarrays. Microarray analysi…
GSE3542	16585219	GPL96	18	Profiling of MCF-7 cell lines stably overexpressing constitutively active Raf-1, constitutively active MEK, constitutively active c-erbB-2, or ligand-activatable EGFR as models of overexpressed growth factor signaling, as well as control vector transfected cells (coMCF-7) and control vector transfected cells long-term adapted for estrogen-independent growth (coMCF-7/lt-E2).
GSE3565	16380512	GPL339	12	Activation of the Mitogen activated protein kinase (MAPK) cascade following Toll-like receptor (TLR) stimulation enables innate immune cells to rapidly activate cytokine gene expression. A balanced response to signals of infectious danger requires that cellular activation is transient. Here, we identify the MAPK phosphatase Dual specificity phosphatase-1 (DUSP1) as an essential endogenous regulat…
GSE357	-	GPL85	18	12 Controls, 3 5-exposures, 3 10-exposures. Rats were exposed to 90 minutes of 0.8% halothane twice a day for a total of 5 or 10 exposures. Animals did not require intubation. All exposures and hybridizations were performed at the Univ. of Pennsylvania.
GSE358	-	GPL85	18	12 Controls, 3 5-exposures, 3 10-exposures. Rats were exposed to 90 minutes of 1.0% isoflurane twice a day for a total of 5 or 10 exposures. Animals did not require intubation. All exposures and hybridizations were performed at the Univ. of Pennsylvania.
GSE3585	17045896	GPL96	12	Dilated cardiomyopathy (DCM) is a common cause of heart failure and a leading cause of cardiac transplantation in western countries. The robust predictive expression profile of cardiomyopathic and NF hearts as well as the functional classification can help to identify promising candidates for DCM and may improve the early diagnosis of cardiomyopathy.
GSE3589	16606835	GPL96	21	Cysteinyl leukotrienes (cysLT), i.e. LTC4, LTD4, and LTE4, are lipid mediators derived from the 5-lipoxygenase pathway. The cysLT receptors cysLT1-R and cysLT2-R are expressed on different target cells and mediate inflammatory reactions in tissue- and LT-R-specific ways. Though endothelial cells (ECs) predominantly express cysLT2-Rs, their role in vascular biology remains to be defined. To deline…
GSE3593	16899777	GPL96	198	Abstract from paper - Potti A, et al
GSE3594	16002470	GPL81	150	The current model to explain the organization of the mammalian nervous system is based on studies of anatomy, embryology, and evolution. To further investigate the molecular organization of the adult mammalian brain, we have built a gene expression-based brain map. We measured gene expression patterns for 24 neural tissues covering the mouse central nervous system and found, surprisingly, that th…
GSE36	12097346	GPL75	16	This study explores the profiles of genes expressed during conditional differentiation of inner ear hair cell precursors in vitro. The cell line UB/OC-1 was derived from mouse embryonic organs of Corti (Rivolta et al, Proc. R. Soc. Lond. B 265: 1595-1603, 1998) and it can be induced to differentiate upon a temperature shift. The study has been replicated in two separate populations of cells, name…
GSE36	12097346	GPL76	16	This study explores the profiles of genes expressed during conditional differentiation of inner ear hair cell precursors in vitro. The cell line UB/OC-1 was derived from mouse embryonic organs of Corti (Rivolta et al, Proc. R. Soc. Lond. B 265: 1595-1603, 1998) and it can be induced to differentiate upon a temperature shift. The study has been replicated in two separate populations of cells, name…
GSE360	12663451	GPL91	28	Monocyte-derived dendritic cells (DC) and macrophages (MÎŠ) generated in vitro from the same individual blood donors were exposed to five different pathogens, and gene expression profiles were assessed by microarray analysis. Responses to Mycobacterium tuberculosis and to phylogenetically distinct protozoan (Leishmania major, L. donovani, Toxoplasma gondii) and helminth (Brugia malayi) parasites …
GSE3606	16990507	GPL571	20	White blood cells (WBCs) express tens of thousands of genes. Their expression levels are modified by genetic and external factors. The purpose of the present study was to investigate the effects of acute exercise on gene expression profiles (GEPs) of WBCs and to identify suitable genes which may serve as surrogate markers for monitoring exercise and training load. Five male probands performed an …
GSE361	12717449	GPL80	20	Analysis of gene expression in mammary epithelial cells transduced with either hTERT, empty LXSN vector or empty BABE vector.
GSE362	12783983	GPL97	15	vastus lateralis biopsies were obtained from healthy subjects, either young adults (20-29 yr old) or older (65-75 yr old)Keywords = muscleKeywords = aging
GSE362	12783983	GPL96	15	vastus lateralis biopsies were obtained from healthy subjects, either young adults (20-29 yr old) or older (65-75 yr old)Keywords = muscleKeywords = aging
GSE3621	17696994	GPL1261	18	HD R6/1 transgenic mouse line brain hemispheres dissected. RNA targets were created for transgenics and wildtypes at time points 18, 22 and 27 weeks. Profiles and data analysis performed using the Bioconductor software and linear model contrasts using LIMMA on RMA probeset summarys.
GSE3629	17255260	GPL570	121	Samples were taken from either surgically resected specimens or during surveillance colonoscopic examination. The expression profiles were determined using Affymetrix Human Genome U133 Plus 2.0 arrays. Comparison between the sample groups allow to identify a set of discriminating genes that can be used for molecular markers for predicting development of cancer and/or dysplasia in ulcerative colit…
GSE363	15238619	GPL81	12	Examination of gene expression profiles from liver of C57BL/6 mice and LDL receptor deficient mice fed on either a low fat diet or a high fat Western-style diet for 12 weeks. Three replicates of each condition analyzed.Keywords = LDL receptor deficiency, high fat diet, atherosclerosis, liver
GSE3634	17005371	GPL339	30	To elucidate the pathways involved in the SCA7 retinal degeneration, we used DNA GeneChips and compared the gene expression profiles of the mutant mice (R7E) and the control ones (R7N). We performed these experiments at the onset stage of the disease (3w) as well as on the moderate one (9w) in order to correlate the transcriptional deregulations with the phenotype progression.We also compared the…
GSE3644	-	GPL339	12	Mouse pancreas from wild type and MistKO animals were induced either with caerulein or saline as control and processed for RNA. Targets from three biological replicates of each were generated and the expression profiles were determined using Affymetrix Mouse Expression chips 430. Comparisons between the sample groups allow the identification of genes with differential expression patterns of genes…
GSE3653	16809427	GPL1261	16	Expression of the proendocrine gene neurogenin 3 (Ngn3) is required for the development of pancreatic islets. In order to better characterize the molecular events regulated by Ngn3 during development, we have determined the expression profile of differentiating murine embryonic stem cells (mESCs) uniformly induced to overexpress Ngn3. An ESC line was created that allows for the induction of Ngn3 …
GSE367	12843263	GPL81	12	The paraventricular hypothalamic nucleus (PVH) is a key site for integrating neuroendocrine, autonomic, and behavioral adjustments to diverse homeostatic challenges, including ""physiological"" (e.g., infection or hemorrhage) and ""emotional"" [e.g., restraint (RST) or footshock] stresses. Both types of challenges ultimately converge to activate common response systems represented in PVH, includi…
GSE3678	-	GPL570	14	we analyzed the gene expression profiles of 7 PTC samples compared to 7 paired normal samples using Affymetrix tools and dChip software. The objective was to find potential molecular markers for this disease
GSE369	12754505	GPL81	12	Changes in mouse liver mRNA profiles following intraperitoneal cytokine injection.Either interferon-gamma-/-, albumin-cre(-) Socs3(w/fl) mice, or albumin-cre(+) Socs3(-/fl) mice were injected with either phosphate-buffered saline, interferon-gamma, or interfeukin-6, and livers taken after 4h.Keywords = Socs3, interferon gamma, interleukin-6, il6, liver, suppressor of cytokine signalling 3
GSE3697	-	GPL571	42	Although HSF1 is known to play an important role in regulating the cellular response to proteotoxic stressors, little is known about the structure and function of the HSF1 signaling network under both stressed and unstressed conditions. In this study, we used a combination of chromatin immunoprecipitation (ChIP) microarray analysis and time course gene expression microarray analysis with and with…
GSE3720	16423401	GPL571	12	The two major human gd T cell subsets, Vd1 and Vd2, display differences in tissue tropism and agonist responses, but we have little insight into global differences that may exist at the gene expression level. This is due to the small numbers of these cells that can be obtained from healthy donors, which limit comprehensive, comparative gene expression analyses. We established a culture method tha…
GSE3722	-	GPL339	22	Leukemias and other cancers possess a rare population of cells capable of self-renewal, and eradication of these cancer stem cells is likely necessary for long-term cancer-free survival. Given that both normal and cancer stem cells are capable of self-renewal the extent to which cancer stem cells resemble normal tissue stem cells is a critical issue if targeted therapies are to be developed. We i…
GSE3725	16862118	GPL339	28	Leukemias and other cancers possess a rare population of cells capable of self-renewal, and eradication of these cancer stem cells is likely necessary for long-term cancer-free survival. Given that both normal and cancer stem cells are capable of self-renewal the extent to which cancer stem cells resemble normal tissue stem cells is a critical issue if targeted therapies are to be developed. We i…
GSE3726	16436632	GPL96	104	A number of breast or colon specific genes predictive of the relapse status were used in comparing the outcome from matched fresh frozen and stored in RNAlater preservative.
GSE3740	16946407	GPL85	13	The specific role of nutritional status during gestation in exacerbating or mitigating fetal toxicity of ethanol (EtOH) remains unclear. We used an intragastric infusion model (Total enteral nutrition, TEN) to appropriately control for dietary EtOH consumption and caloric intake. Time impregnated female Sprague Dawley rats (250-300 g) were surgically cannulated with intragastric cannulae (on gest…
GSE3744	16473279	GPL570	47	Gene expression for 47 human breast tumor cases;(* normalized by GCRMA for global expression analysis)
GSE3749	17394647	GPL339	33	An 11-point time course study on differentiating embryoid bodies from a murine J1 embryonic stem cell line. The time course includes 0 hr, 6 hr, 12 hr, 18 hr, 24 hr, 36 hr, 48 hr, 4 days, 7 days, 9 days and 14 days.
GSE3749	17394647	GPL340	33	An 11-point time course study on differentiating embryoid bodies from a murine J1 embryonic stem cell line. The time course includes 0 hr, 6 hr, 12 hr, 18 hr, 24 hr, 36 hr, 48 hr, 4 days, 7 days, 9 days and 14 days.
GSE3772	-	GPL96	10	Gene expression of cord blood derived lineage negative and lineage positive hematopoeitic stem cells was studied by collecting samples following 4 days of culture in Stem span medium. For comparison, samples were also collected following both a mock and fresh medium exchange.
GSE3772	-	GPL97	10	Gene expression of cord blood derived lineage negative and lineage positive hematopoeitic stem cells was studied by collecting samples following 4 days of culture in Stem span medium. For comparison, samples were also collected following both a mock and fresh medium exchange.
GSE3780	-	GPL96	30	Fetal myoblasts represent an important source of myogenic stem cells. Analysis of undifferentiated myoblasts and comparison to their cognate differentiated progeny will allow the ascertainment of genes that are important for maintaining myogenic stem cells.Fetal myoblasts (undifferentiated, time 0hr) will be compared to myoblasts cells allowed to differentiate by the removal of the SKBM-2 medium …
GSE3780	-	GPL97	30	Fetal myoblasts represent an important source of myogenic stem cells. Analysis of undifferentiated myoblasts and comparison to their cognate differentiated progeny will allow the ascertainment of genes that are important for maintaining myogenic stem cells.Fetal myoblasts (undifferentiated, time 0hr) will be compared to myoblasts cells allowed to differentiate by the removal of the SKBM-2 medium …
GSE3790	16467349	GPL97	203	Post mortem human brain tissue comparison between HD patients and controls from 3 brain regions - cerebellum, frontal cortex [BA4, BA9] and caudate nucleus. Gene expression analysed using linear models from LIMMA package in Bioconductor suite.
GSE3790	16467349	GPL96	201	Post mortem human brain tissue comparison between HD patients and controls from 3 brain regions - cerebellum, frontal cortex [BA4, BA9] and caudate nucleus. Gene expression analysed using linear models from LIMMA package in Bioconductor suite.
GSE3792	-	GPL339	21	Differentiation Time Course; examination of osteoblast differentation by comparing cells exposed to growth factors with ctrl cells.
GSE3792	-	GPL340	21	Differentiation Time Course; examination of osteoblast differentation by comparing cells exposed to growth factors with ctrl cells.
GSE3808	16581055	GPL340	14	Complete (whole) embryonic kidneys were dissected from wild type and Hoxa11, Hoxd11 compound null embryons throughout development. Targets from two biological replicates of each were generated and the expression profiles were determined using Affymetrix MOE430A and MOE430B arrays. Comparisons between normal and mutant and comparisons of development samples identified global patterns of gene regul…
GSE3808	16581055	GPL339	14	Complete (whole) embryonic kidneys were dissected from wild type and Hoxa11, Hoxd11 compound null embryons throughout development. Targets from two biological replicates of each were generated and the expression profiles were determined using Affymetrix MOE430A and MOE430B arrays. Comparisons between normal and mutant and comparisons of development samples identified global patterns of gene regul…
GSE3822	16581055	GPL1261	16	E11.5 metanephric mesenchyme and ureteric bud were dissected from the E11.5 kidney rudiment using fine manual microdissection (ureteric bud only) or both fine manual microdissection and laser capture microdissection (metanephric mesenchyme) to define the gene expression profiles of these structures. Additionally, HoxA11, HoxD11 compound null E11.5 metanephric mesenchyme was obtained through laser…
GSE3823	-	GPL96	21	Investigation of human hematopoietic stem cells gene expression patterns originating from different stages of ontogeny including fetal blood, cord blood, bone marrow, and mobilized peripheral blood in Lin-CD34+CD38- versus Lin-CD34+CD38+ populations.
GSE3823	-	GPL97	21	Investigation of human hematopoietic stem cells gene expression patterns originating from different stages of ontogeny including fetal blood, cord blood, bone marrow, and mobilized peripheral blood in Lin-CD34+CD38- versus Lin-CD34+CD38+ populations.
GSE3834	16606439	GPL96	13	We generated DNA microarray based gene expression profiles from three estrogen receptor a (ERa) positive breast cancer cell lines stimulated by 17Ã-estradiol (E2) in vitro over a time course, as well as from MCF-7 cells grown as xenografts in ovariectomized athymic nude mice with E2 supplementation and after its withdrawal.
GSE3834	16606439	GPL570	34	We generated DNA microarray based gene expression profiles from three estrogen receptor a (ERa) positive breast cancer cell lines stimulated by 17Ã-estradiol (E2) in vitro over a time course, as well as from MCF-7 cells grown as xenografts in ovariectomized athymic nude mice with E2 supplementation and after its withdrawal.
GSE3837	17183656	GPL1261	12	Mycobacteria-induced apoptosis of macrophages plays an important role in modulation of the host immune response involving TNF-alpha as major cytokine. The underlying mechanisms are still ill-defined. Here, we show for the first time that methylglyoxal (MG) and AGEs levels were elevated during mycobacterial infection of macrophages and that their increased levels mediated mycobacteria-induced apop…
GSE3846	17010189	GPL96	108	The aim of this study was to measure the influence of beverages on blood gene expression. We wanted to explore the underlying mechanisms of the cardioprotective effects of red wine.
GSE3849	17360665	GPL1261	10	Investigation of RNA transcript abundance in aortic tissue of NPAS2 mutant versus wild type mice at ZT14
GSE3858	16437161	GPL339	36	We used a combination of genome-wide and promoter-specific DNA binding and expression analyses to assess the functional roles of Myod and Myog in regulating the program of skeletal muscle gene expression. Our findings indicate that Myod and Myog have distinct regulatory roles at a similar set of target genes. At genes expressed throughout the program of myogenic differentiation, Myod can bind and…
GSE3860	15268757	GPL96	18	HutchinsonâGilford progeria syndrome (HGPS) is a rare genetic disease with widespread phenotypic features resembling premature aging. HGPS was recently shown to be caused by dominant mutations in the LMNA gene, resulting in the in-frame deletion of 50 amino acids near the carboxyl terminus of the encoded lamin A protein. Children with this disease typically succumb to myocardial infarction or s…
GSE3860	15268757	GPL97	18	HutchinsonâGilford progeria syndrome (HGPS) is a rare genetic disease with widespread phenotypic features resembling premature aging. HGPS was recently shown to be caused by dominant mutations in the LMNA gene, resulting in the in-frame deletion of 50 amino acids near the carboxyl terminus of the encoded lamin A protein. Children with this disease typically succumb to myocardial infarction or s…
GSE3866	16873723	GPL1355	10	Mitogen-activated protein kinases (MAPKs) regulate cardiomyocyte growth and apoptosis in response to extracellular stimulation, but the downstream effectors that mediate their pathophysiological effects remain poorly understood. We determined the targets and role of p38 MAPK in the heart in vivo by using local adenovirus-mediated gene transfer of constitutively active upstream kinase mitogen-acti…
GSE3868	16513839	GPL96	30	The histopathological and molecular heterogeneity of prostate cancer and the limited availability of human tumor tissue make unraveling the mechanisms of prostate carcinogenesis a challenging task. Our goal was to develop an ex vivo model that could be reliably utilized to define a prognostic signature based on gene expression profiling of cell cultures that maintained the tumor phenotype. To thi…
GSE3889	17005996	GPL1261	20	Stearoyl-CoA desaturase 1-deficient (SCD1-/-) mice have impaired monounsaturated fatty acid (MUFA) synthesis. When maintained on a very low-fat, high-carbohydrate (VLF-HC) diet, SCD1-/- mice develop severe hypercholesterolemia characterized by an increase in apolipoprotein B-containing lipoproteins and the appearance of lipoprotein-X. Additionally, high-density lipoprotein cholesterol is dramatic…
GSE3891	16618722	GPL97	10	Human microvascular endothelial cells were stimulated to either proliferate or undergo tubulogenesis over an 8 hour time period.
GSE3891	16618722	GPL96	10	Human microvascular endothelial cells were stimulated to either proliferate or undergo tubulogenesis over an 8 hour time period.
GSE3893	16707453	GPL96	10	This is a matched-pair analysis of ductal carcinoma in situ (DCIS) and invasive component (IDC) of nine breast ductal carcinoma to identify novel molecular markers characterizing the transition from DCIS to IDC for a better understanding of its molecular biology.
GSE3893	16707453	GPL570	14	This is a matched-pair analysis of ductal carcinoma in situ (DCIS) and invasive component (IDC) of nine breast ductal carcinoma to identify novel molecular markers characterizing the transition from DCIS to IDC for a better understanding of its molecular biology.
GSE3894	16809669	GPL201	143	By comparing the expression levels of genes between carriers of Nijmegen Breakage Syndrome and non-carriers, we showed that NBS carriers have a distinct gene expression phenotype.
GSE3910	16822902	GPL96	70	35 paired samples from initial diagnosis and first marrow relapse. Genes and pathways differentiating diagnosis and relapse were identified. Potential therapeutic targets were also identified.
GSE3911	16822902	GPL96	59	Gene expression profiles were analyzed from 60 children with first bone marrow relapse. Genes and pathways differentiating early vs. late relapse were identified. Signatures predicting early response to therapy were also identified.
GSE3912	16822902	GPL96	113	This SuperSeries comprises the following subset Series:GSE3910: 35 patients at diagnosis and relapseGSE3911: 60 samples obtained at relapse
GSE3920	17202376	GPL96	23	IFNs are highly pleiotropic cytokines also endowed with marked anti-angiogenic activity. In this study, the mRNA expression profiles of endothelial cells (EC) exposed in vitro to IFN-alpha, IFN-beta, orIFN-gamma were determined. We found that in HUVEC as well as in other EC types 175 genes were upregulated (>2-fold increase) by IFNs, including genes involved in the host response to RNA viruses, i…
GSE3925	16569774	GPL82	12	Mice representing phenotypic extremes of airway hyperreactivity and goblet cell metaplasia post-Sendai virus infection were identified from a 500 mouse F2 cohort (CB6F2/J). Whole lung RNA from 3 mice at each extreme was analyzed via microarray for gene expression. Subsequent pairwise comparisons between arrays allowed the identification of genes differentially expressed with respect to the diseas…
GSE3925	16569774	GPL83	12	Mice representing phenotypic extremes of airway hyperreactivity and goblet cell metaplasia post-Sendai virus infection were identified from a 500 mouse F2 cohort (CB6F2/J). Whole lung RNA from 3 mice at each extreme was analyzed via microarray for gene expression. Subsequent pairwise comparisons between arrays allowed the identification of genes differentially expressed with respect to the diseas…
GSE3925	16569774	GPL81	12	Mice representing phenotypic extremes of airway hyperreactivity and goblet cell metaplasia post-Sendai virus infection were identified from a 500 mouse F2 cohort (CB6F2/J). Whole lung RNA from 3 mice at each extreme was analyzed via microarray for gene expression. Subsequent pairwise comparisons between arrays allowed the identification of genes differentially expressed with respect to the diseas…
GSE3952	16648578	GPL85	43	A rexinoid, targretin (TRG) and two retinoids, 9-cis retinoic acid (9cRA) and 4-hydroxyphenylretinamide (4HPR) were examined for their effects on gene expression in rat mammary gland, liver, and lung tissues. The chemopreventive effects of these agents have largely been attributed to their ability to interact with retinoic acid receptors (RAR) and/or retinoid X-receptors (RXR). TRG interacts with…
GSE3960	16778177	GPL91	102	The specific genes that influence neuroblastoma biology and are targeted by genomic alterations remain largely unknown. We quantified mRNA expression in a highly annotated series of 101 prospectively collected diagnostic neuroblastoma primary tumors and the expression profiles were determined using Affymetrix U95Av2 arrays. Comparisons between the sample groups allow the identification of genes w…
GSE3963	16547164	GPL81	48	Hippocamus and amygdala expression was examined in naÃ¯ve, conditioned stimulus exposed, and fear conditioned mice 30 minutes after behavioral manipulation
GSE3965	16202713	GPL81	12	Expression of VP16-CREB, a constitutively active form of CREB, in hippocampal neurons of the CA1 region lowers the threshold for eliciting the late, persistent phase of long-term potentiation (L-LTP) in the Schaffer collateral pathway. This VP16-CREB-mediated L-LTP differs from the conventional late phase of LTP in not being dependent on new transcription. This finding suggests that in the transg…
GSE3982	16474395	GPL96	32	In the present study we used Affymetrix oligonucleotide microarrays to produce gene transcription profiles for the major leukocyte types in humans. This comprehensive dataset enabled us to not only establish which genes were expressed in each leukocyte type, but also which genes were expressed in each subset after activation. The used of a comprehensive dataset of gene profiles from all the major…
GSE3997	17239257	GPL339	24	Background. T cells in the thymus undergo opposing positive and negative selection processes so that the only T cells entering circulation are those bearing a T cell receptor (TCR) with a low affinity for self. The mechanism differentiating negative from positive selection is poorly understood, despite the fact that inherited defects in negative selection underlie organ-specific autoimmune diseas…
GSE3998	16638148	GPL570	20	Luminal, basal, stromal, and endothelial cells were MACS sorted from whole tissue. Targets from five biological replicates of each were generated and the expression profiles were determined using Affymetrix U133 Plus 2.0 arrays. These data represent cell specific transcriptomes.
GSE4006	16809442	GPL96	12	Two subtypes of the estrogen receptor, ERalpha and ERbeta, mediate the actions of estrogens, and the majority of human breast tumors contain both ERalpha and ERbeta. To examine the possible interactions and modulatory effects of ERbeta on ERalpha activity, we have used adenoviral gene delivery to produce human breast cancer (MCF-7) cells expressing ERbeta, along with their endogenous ERalpha. We …
GSE4025	16849584	GPL96	17	The beneficial effect of the selective estrogen receptor modulator (SERM) tamoxifen in the treatment and prevention of breast cancer is assumed to be through its ability to antagonize the stimulatory actions of estrogen, although tamoxifen can also have some estrogen-like agonist effects. Here we report that in addition to these mixed agonist/antagonist actions, tamoxifen can also selectively reg…
GSE4028	-	GPL1355	21	Anterior pituitary glands were isolated from 21 week old male rats either untreated or treated for 12 weeks with the synthetic estrogen diethylstilbestrol (DES). Three biological replicates were prepared for untreated, control animals and four biological replicates were prepared for DES-treated animals. This was done for each of 3 inbred rat strains: ACI, Copenhagen, and Brown Norway. Expression …
GSE4029	16624857	GPL1261	10	Basonuclin, which is a zinc-finger protein found in abundance only in the keratinocytes of the stratified epithelium, male germ cells and oocytes, qualifies as a maternal-effect gene because the source of pre-implantation embryonic basonuclin is maternal. Using a transgenic-RNAi approach, we knocked-down basonuclin specifically in mouse oocytes, which led to female sub-fertility. Basonuclin defic…
GSE403	14532334	GPL91	12	Timecourse of cAMP-induced decidualization of endometrial stromal cells.
GSE4031	-	GPL1355	105	In pevious research we have shown that the disruption of the normal development of the ventral hippocampus in rodents leads to cellular abnormalities in the frontal cortex and behavioral deficits related to schizophenia (Neurotox Res. 2002, 4(5-6):469-475). We propose the use of gene expression analysis to investigate the molecular underpinnings of these processes which may shed light on the mole…
GSE4034	-	GPL1261	24	Fear conditioning (FC) is a behavioral paradigm that measures an animal's ability to learn fear related information. FC is measured by pairing a mild foot-shock with the surroundings in which the shock was recieved. Upon being placed back in the context, mice exhibit freezing behavior, which is a species-specific response to fear. We have previously used selective breeding to produce lines of mic…
GSE4035	-	GPL1261	24	Fear conditioning (FC) is a behavioral paradigm that measures an animalâs ability to learn fear related information. FC is measured by pairing a mild foot-shock with the surroundings in which the shock was received. Upon being placed back in the context, mice exhibit freezing behavior, which is a species-specific response to fear. We have used selective breeding to produce lines of mice with hi…
GSE4036	-	GPL570	28	Our laboratory has developed the first mouse model overexpressing a RNA-binding protein, the ELAV-like protein HuD, in the CNS under the control of the CaMKinII alpha promoter. Initial behavioral characterization of the mice revealed that they had significant learning deficits together with abnormalities in prepulse inhibition (PPI). At the molecular level, we found that the expression of the gro…
GSE4037	-	GPL1355	18	The goal of the research proposed herein is to identify (i) gene products that allow identification of specific precursor populations in vivo and (ii) genetic programs that regulate the generation of lineaege-restricted precursor (LRP) cells from neuroepithelial stem cells (NSC). As these cells play a major role in development and tissue repair, this effort will enhance both basic and clinically …
GSE4045	16819509	GPL96	37	Serrated adenocarcinomas are morphologically different from conventional adenocarcinomas. The serrated pathway has recently been proposed to represent a novel mechanism of colorectal cancer (CRC) formation. However, whether they are biologically different and truly form a distinct subclass of CRC, is not known. This study shows that the gene expression profile of serrated and conventional CRCs di…
GSE4051	16505381	GPL1261	39	Purpose: To investigate the gene regulatory networks during photoreceptor differentiation. Special aims: To generate gene expression profiles of purified photoreceptors at distinct developmental stages and from different genetic backgrounds.Background: Rod photoreceptor genesis spans a broad temporal window during retinal development. It starts as early as E12.5 and peaks at P0-P2. At E16.5, ther…
GSE4060	16772347	GPL570	14	Abstract submitted to the Journal of clinical encodcrinology and metabolism:The molecular mechanisms responsible for the ectopic expression of the GIP receptor in the adrenal cortex of patients with GIP-dependent Cushingâs syndrome (CS) are unknown. Chronic adrenal stimulation by ACTH in Cushingâs disease (CD) or by GIP in GIP-dependent AIMAH both lead to induction of a set of genes which sti…
GSE4063	16410251	GPL339	12	Analysis of AMPK gamma3-dependent transcriptional responses by analyzing global gene expression in the white portion of the gastrocnemius muscle in AMPK gamma3 knock-out mice and corresponding wild type littermates.
GSE4065	16410251	GPL339	12	Analysis of AMPK gamma3-dependent transcriptional responses by analyzing global gene expression in the white portion of the gastrocnemius muscle in AMPK gamma3 mutant (R225Q) transgenic mice and corresponding wild type littermates.
GSE4066	17003495	GPL339	23	Exposure to ultraviolet (UV) irradiation is the major cause of nonmelanoma skin cancer, the most common form of cancer in the United States. UV irradiation has a variety of effects on the skin associated with carcinogenesis, including DNA damage and effects on signal transduction. The alterations in signaling caused by UV regulate inflammation, cell proliferation, and apoptosis. UV also activates…
GSE4067	16410251	GPL339	24	This SuperSeries is composed of the following subset Series:GSE4063: Gene expression in skeletal muscle in AMPK gamma3 knock-out mice and wild type littermatesGSE4065: Gene expression in skeletal muscle in AMPK gamma3 mutant (R225Q) transgenic mice and wild type littermates.Note: GSE4063 and GSE4065 are not directly comparable.
GSE4080	-	GPL1355	12	Anterior pituitary glands were isolated from 21 week old male rats treated for 12 weeks with the synthetic estrogen diethylstilbestrol (DES). Three biological replicates were prepared for each of 4 congenic lines: Ept1, Ept2, Ept6, and Ept9. Congenic rat lines were constructed by introgressing COP alleles onto an ACI background within a given Ept locus. Expression profiles were determined using A…
GSE4081	-	GPL1355	43	Anterior pituitary glands were isolated from 21 week old male rats treated for 12 weeks with the synthetic estrogen diethylstilbestrol (DES). 43 COPxACI F2 animals were selected based on pituitary weight phenotypic extremes: 22 highest and 21 lowest pituitary weights in our F2 population. Expression profiles were determined using Affymetrix Rat Genome 230 v. 2.0 arrays. In conjunction with genome…
GSE4083	-	GPL1355	76	This SuperSeries is composed of the following subset Series:GSE4028: Effects of diethylstilbestrol (DES) on the anterior pituitary gland of the ACI, Copenhagen and Brown Norway Rat.GSE4080: Effect of DES-treated Ept congenic rat lines on gene expression in the anterior pituitary gland.GSE4081: Expression QTL (eQTL) mapping in the anterior pituitary gland using DES-treated COPxACI F2 rats.
GSE4085	-	GPL340	12	Investigation of very early events required for initiating differentiation of pluripotent embryonal carcinoma cells - the effect of cell aggregation on gene expression.
GSE4085	-	GPL339	12	Investigation of very early events required for initiating differentiation of pluripotent embryonal carcinoma cells - the effect of cell aggregation on gene expression.
GSE4087	-	GPL340	17	Two independent ES cell lines (D4 and C2) were assessed for chimerism and germline transmission. Although these lines were able to produce chimerism at early passage, no germ line transmission was seen. After passaging in a proprietary medium and subcloning by detaching loosely connected cells and culturing in the recommended medium, both lines experienced an increase in potential as evidenced by…
GSE4087	-	GPL339	17	Two independent ES cell lines (D4 and C2) were assessed for chimerism and germline transmission. Although these lines were able to produce chimerism at early passage, no germ line transmission was seen. After passaging in a proprietary medium and subcloning by detaching loosely connected cells and culturing in the recommended medium, both lines experienced an increase in potential as evidenced by…
GSE409	15159079	GPL96	19	A series of chips with some repeated measurments. Each chip represents a pool of 4 collagen/chondroitin sulfate tissue engineering scaffold meshes seeded with 1 x 10^6 IMR-90 Human Fibroblasts.mRNA was isolated at 30 minutes, 1, 2, 4, 8, 12, 24, 48, and 72 hours after seeding.Keywords = tissue engineering mesh, collagen, chondroitin sulfate, biomaterials design
GSE4098	16675456	GPL1261	16	Limbal vs. corneal epithelial basal cell gene expression patterns were identified and compared
GSE410	15159079	GPL96	13	IMR-90 Human Fibroblasts were seeded onto TCPS dishes. mRNA was isolated at 1, 2, 4, 8, 12, 24, 48 and 96 hours. This time course was used as a control for gene expression studies on collagen/chondroitin sulfate tissue engineering scaffold materials using the same cell line.Keywords = tissue culture plates
GSE4105	16554547	GPL341	12	Rats underwent surgery for LAD ligation for 30 min followed by reperfusion. Heart ventricles were collected 2d or 7d after reperfusion.
GSE4107	17317818	GPL570	22	Background: Causative genes for autosomal dominantly inherited familial adenomatous polyposis (FAP) and hereditary non-polyposis colorectal cancer (HNPCC) have been well characterized. There is, however, another 10-15 % early onset colorectal cancer (CRC) whose genetic components are currently unknown. In this study, we used DNA chip technology to systematically search for genes differentially ex…
GSE411	12754506	GPL81	17	Effects of SOCS3 on the transcriptional response of bone marrow-derived macrophages to IL-6.Fetal liver cells from SOCS3+/+ or SOCS3-/- embryos were used to reconstitute recipient mice. Donor derived bone marrow from these mice was differentiated to macrophages. Macrophages were either unstimulated, or stimulated for 100 or 400 minutes with 10 ng/ml IL-6.Keywords = macrophage, SOCS3, IL-6, interf…
GSE4115	17334370	GPL96	192	RNA was obtained from histologically normal bronchial epithelium of smokers during time of clinical bronchoscopy from relatively accessible airway tissue. Gene expression data from smokers with lung cancer was compared with samples from smokers without lung cancer. This allowed us to generate a diagnostic gene expression profile that could distinguish the two classes. This profile could provide a…
GSE4119	16492768	GPL96	80	mononuclear cells were isolated on a density gradient and RNA extracted using Trizol and the Promega SV column RNA purification. Affymetrix U133A chips were hybridised using standard procedures at the core facility of Dana Farber Cancer Institute.
GSE412	12704389	GPL91	120	To elucidate the genomics of cellular responses to cancer treatment, we analyzed the expression of over 9,600 human genes in acute lymphoblastic leukemia cells before and after in vivo treatment with methotrexate and mercaptopurine given alone or in combination. Based on changes in gene expression, we identified 124 genes that accurately discriminated among the four treatments. Discriminating gen…
GSE4120	17030684	GPL339	10	Endurance training accelerated development of right ventricular dysfunction and arrhythmias in plakoglobin+/- mice. Histology and electron microscopy did not identify right ventricular abnormalities. To identify differences in the transcriptional response to training gene expression profiling was performed.
GSE4124	16691187	GPL571	45	We used Affymetrix U133A 2.0 chips to better understand transcriptional changes associated with HIV-1 infection and perinatal transmission in human PBMCS obtained from young adult mothers with infants in Botswana in vivo. HIV seropositive and drug naÃ¯ve samples:GSM94333, GSM94334, GSM94335, GSM94336, GSM94337, GSM94338, GSM94340, GSM94342, GSM94343, GSM94345, GSM94351, GSM94353, GSM94354, GSM943…
GSE4127	-	GPL96	29	Anticancer drug clustering in lung cancer based on gene expression profiles.We performed gene expression analysis in lung cancer cell lines. (used: Affymetrix GeneChip Human Genome U133 Array Set HG-U133A).We also examines the sensitivity of these cell lines to commonly used anti-cancer agents (docetaxel, paclitaxel, gemcitabine, vinorelbine, 5-FU, SN38, cisplatin, and carboplatin) via MTT assay.…
GSE4130	16432224	GPL1355	30	This SuperSeries is composed of the following subset Series:GSE3110: Comprehensive description of the transcriptome of hypothalamo-neurohypophyseal system in euhydrated and dehydrated ratGSE3111: Comprehensive description of the transcriptome of PVN in euhydrated and dehydrated ratGSE3125: Comprehensive description of the transcriptome of neurointermediate lobe in euhydrated and dehydrated rat
GSE414	-	GPL81	13	After 2 week acclimation to 12 hr/12 hr light/dark regimen, c57/Bl6 mice were subjected to a 36 hour period of constant darkness. Aortae were subsequently harvested at 4 hour intervals to 48 hours. Duplicate microarrays were hybridized with biotin-labeled probes derived from aorta tissue (6 pooled aortae/timepoint).
GSE4142	16492737	GPL1261	14	In order to better understand the factors that regulate B cell differentiation upon exposure to antigen, we compares global gene expression profiles from naive B cells with antigen-specific plasma, germinal center, and memory B cells after immunization with the T-dependent antigen, NP-CGG. The memory B cell-enriched transcripts were then compared with memory T cell-enriched and hematopoietic stem…
GSE415	12902547	GPL76	18	We employed the Affymetrix GeneChip technology to evaluate the patterns of expression in two different in vivo models of cardiac remodeling and in two different regions (left ventricle free wall and septum) of the heart. Mice underwent transverse aortic constriction (TAC); myocardial infarction (MI) or Sham operation and RNA from the left ventricle free wall and the septum was isolated 1 week lat…
GSE415	12902547	GPL75	18	We employed the Affymetrix GeneChip technology to evaluate the patterns of expression in two different in vivo models of cardiac remodeling and in two different regions (left ventricle free wall and septum) of the heart. Mice underwent transverse aortic constriction (TAC); myocardial infarction (MI) or Sham operation and RNA from the left ventricle free wall and the septum was isolated 1 week lat…
GSE4172	17106732	GPL570	12	Since targeting of specific pathogenic pathways may be more efficient than current unspecific heart failure treatment, we obtained genomewide expression profiles of a DCM subtype characterized by cardiac inflammation (DCMi) in association with parvovirus B19. This study was entirely based on RNA isolated from endomyocardial biopsies so far only rarely used for genomic expression profiling.
GSE4189	16518401	GPL1261	14	A) We profiled gene expression changes during ES cell differentiationB) We profiled gene expression changes when Pou5f1 or Nanog is knockdown upon RNAi
GSE4192	-	GPL85	45	This SuperSeries is composed of the following subset Series:GSE1654: Circadian Profiling of the Transcriptome in Immortalized Rat SCN Cells (3 biological replicates)GSE1673: Circadian Profiling of the Transcriptome in Immortalized Rat SCN Cells: Comparison to Long-Evans Rat SCN
GSE420	14530203	GPL91	10	BACKGROUND: Previous genomic studies with human tissues have compared differential gene expression between 2 conditions (ie, normal versus diseased) to identify altered gene expression in a binary manner; however, a potentially more informative approach is to correlate the levels of gene expression with quantitative physiological parameters. METHODS AND RESULTS: In this study, we have used this a…
GSE421	12902548	GPL85	11	Myocardial aging leads to a reduction of beta-adrenergic receptor-induced metabolic and contractile responsiveness. We hypothesize that a change in the patterns of gene expression is important in these age-related events. To test this, hearts were harvested from young and aged male rats (3-4 and 20-22 mo, respectively). Total mRNA was extracted and prepared for hybridization to Affymetrix U34A Ge…
GSE4217	17127033	GPL570	12	Mammalian cells were grown as multicellular aggregates (spheroids) in an effort to determine the signaling events required for two cellular transformations states; primary foreskin fibroblasts (HFF-2) and glioblastoma cancer (T98G) cells, to survive at room temperature under oxygen and nutrient-deprived conditions for extended periods of time (2 weeks) and subsequently grown out from the arrested…
GSE4218	17127033	GPL570	12	Mammalian cells were grown as multicellular aggregates (spheroids) in an effort to determine the signaling events required for two cellular transformations states; primary foreskin fibroblasts (HFF-2) and glioblastoma cancer (T98G) cells, to survive at room temperature under oxygen and nutrient-deprived conditions for extended periods of time (2 weeks) and subsequently grown out from the arrested…
GSE4219	17127033	GPL570	24	This SuperSeries is composed of the following subset Series:GSE4217: Spheroid Formation and Recovery of Human Foreskin Fibroblasts at Ambient TemperatureGSE4218: Spheroid Formation and Recovery of Human T98G Glioma Cells at Ambient Temperature
GSE422	13130079	GPL81	16	Transcriptional Profiling of the Transition from Normal Intestinal Epithelia to Adenomas and Carcinomas in the APC(Min/+) Mouse.Samples used in analysis:* GSM6191-GSM6196 (WT): Ilea epithelial cells from C57/BL6 wild-type samples* GSM6197-GSM6201 (Adenoma): Epithelial cells from crypts of adenomas of APC(Min/+) mice* GSM6202-GSM6206 (Carcinoma): Epithelial cells from crypts of carcinomas of APC(M…
GSE4222	17105756	GPL81	32	The mammary gland of the lactating mouse synthesizes and secretes milk lipid equivalent to its entire body weight in a single 20 day lactation cycle, making it one of the most active lipid synthetic organs known. To test the hypothesis that multiple metabolic control points and potential regulatory mechanisms are involved in activating lipid and lactose synthesis at the onset of lactation we comp…
GSE4228	16757573	GPL96	56	Nitric oxide (NO) can stabilize mRNA by activating p38 mitogen-activated protein kinase (MAPK). Here, transcript stabilization by NO was investigated in human THP-1 cells using microarrays. After LPS pre-stimulation, cells were treated with actinomycin D and then exposed to NO without or with the p38 MAPK inhibitor SB202190. The decay of 220 mRNAs was affected; most were stabilized by NO. Unexpec…
GSE4232	16473883	GPL81	22	Timecourse analysis of Interferon-Gamma (IFNg) signalling in mice deficient for IFNg or both IFNg and Suppressor of Cytokine Signalling-1 (SOCS1).
GSE4236	15800381	GPL85	60	This SuperSeries is composed of the following subset Series:GSE1831: Temporal analysis of P15 hippocampus in kainate-induced seizures. Koh-2K08NS002068-04GSE1834: Temporal analysis of hippocampus in kainate-induced seizures. Koh-7K08NS002068-05-3
GSE4237	-	GPL570	10	Pituitary adenomas are common benign neoplasms giving rise to disorders of growth, reproductive function and cortisol production. Although recently determined to be monoclonal, very little is known about the mechanisms regulating the development of pituitary hyperplasia and neoplasia in humans. Surgical resection is the treatment of choice for most symptomatic pituitary adenomas. The goal of surg…
GSE4238	16998155	GPL1261	24	This study was performed to characterize the rhythmic transcirptome of the murine adrenal gland with a focus on the corticosterone synthesis pathway.
GSE424	12800193	GPL85	12	Temporal analysis of colon carcinoma cell line CC531 response to 4.5 mM butyrate or 3 mM aspirin. Samples taken at 2, 6, 12, 16 and 24 hours.The CC531 cell line has been widely used to study different aspects of tumor growth and metastasis and provides an excellent experimental platform to develop novel antitumor strategies. To characterize the CC531 model at the molecular level, we screened for …
GSE4242	-	GPL88	112	Nicotinic receptors (nAChR) are widely distributed in the adult brain where they mediate excitatory postsynaptic transmission and presynaptic release of other neurotransmitters. Functional nicotinic receptors are also present in the embryonic brain. Several studies have suggested a role for nAChRs in cognitive functions (learning and memory) and cellular events such as degeneration and survival. …
GSE4246	16971455	GPL570	38	HEK-293-derived cell lines depleted of Dicer or one of four Argonaute proteins were generated. Microarray analysis of these knock down cell lines and various control cell lines was performed to address how large the proportion of genes is that are regulated by RNA silencing in an individual cell type. Comparison of different arrays revealed commonly (up) regulated genes. The highest overlap was o…
GSE4251	-	GPL571	18	In recent years gene expression profiling with microarrays has become an important tool in genomic research. Its usefulness in diagnosis and disease classification is now well documented. In many cases routine access to tissues primarily involved in pathophysiological processes is not possible. Attempts have therefore been made to use gene expression patterns in white blood cells (WBCs) as surrog…
GSE4253	16890544	GPL1261	30	This SuperSeries is composed of the following subset Series:GSE4238: rhythmic transcriptome in the murine wt adrenalGSE4239: Transcriptome regulation in the adrenal gland of circadian clock deficient Per2Cry1 double mutant mice
GSE4256	16455785	GPL339	12	Using mice deficient in hepatic cytochrome-P450 oxidoreductase (POR), which disables the liver cytochrome P450 system, the metabolism and biological response of the anti-carcinogenic flavonoid, quercetin, was examined. Profiling circulating metabolites revealed similar profiles over 72 h in wild type (WT) and POR-null (KO) mice, showing that hepatic P450 and reduced biliary secretion do not affec…
GSE4257	16455785	GPL339	12	Using mice deficient in hepatic cytochrome-P450 oxidoreductase (POR), which disables the liver cytochrome P450 system, the metabolism and biological response of the anti-carcinogenic flavonoid, quercetin, was examined. Profiling circulating metabolites revealed similar profiles over 72 h in wild type (WT) and POR-null (KO) mice, showing that hepatic P450 and reduced biliary secretion do not affec…
GSE4258	16455785	GPL339	12	Using mice deficient in hepatic cytochrome-P450 oxidoreductase (POR), which disables the liver cytochrome P450 system, the metabolism and biological response of the anti-carcinogenic flavonoid, quercetin, was examined. Profiling circulating metabolites revealed similar profiles over 72 h in wild type (WT) and POR-null (KO) mice, showing that hepatic P450 and reduced biliary secretion do not affec…
GSE4259	16455785	GPL339	12	Using mice deficient in hepatic cytochrome-P450 oxidoreductase (POR), which disables the liver cytochrome P450 system, the metabolism and biological response of the anti-carcinogenic flavonoid, quercetin, was examined. Profiling circulating metabolites revealed similar profiles over 72 h in wild type (WT) and POR-null (KO) mice, showing that hepatic P450 and reduced biliary secretion do not affec…
GSE426	12840040	GPL91	46	Data files from Genome Research paper ""Comparative analysis of gene expression patterns in human and African great ape cultured fibroblasts""Keywords = African Great Ape, Human Evolution, Fibroblast, Bonobo, Gorilla, Human
GSE4262	16455785	GPL339	48	This SuperSeries is composed of the following subset Series:GSE4256: Colon transcriptional response to quercetin in WT and POR-null miceGSE4257: Ileum transcriptional response to quercetin in WT and POR-null miceGSE4258: Jejunum transcriptional response to quercetin in WT and POR-null miceGSE4259: Liver transcriptional response to quercetin in WT and POR-null mice
GSE4263	16582906	GPL81	10	Wild-type (C57Bl6) mice underwent monocular enucleation at P14 and were sacrificed 4 days later at P18. Bilateral (non-deprived and deprived) visual cortex was dissected from 1-mm thick coronal sections, and total RNA was extracted from the tissue lysate using Trizol (Gibco-BRL).
GSE4269	16582906	GPL81	36	This SuperSeries is composed of the following subset Series:GSE4263: P18 mouse non-deprived vs. deprived visual cortexGSE4264: P24 mouse non-deprived vs. deprived visual cortexGSE4265: P46 mouse non-deprived vs. deprived visual cortexGSE4266: P104 mouse non-deprived vs. deprived visual cortexGSE4267: P46DR (dark reared) mouse non-deprived vs. deprived visual cortex
GSE427	12840040	GPL91	23	Data from human fibroblast cell lines described in Genome Research paper ""Comparative analysis of gene expression patterns in human and African great ape cultured fibroblasts""Keywords = African Great Ape, Human Evolution, Fibroblast, Bonobo, Gorilla, Human
GSE4271	16530701	GPL96	100	Novel prognostic subclasses of high-grade astrocytoma are identified and discovered to resemble stages in neurogenesis. One tumor class displaying neuronal lineage markers shows longer survival, while two tumor classes enriched for neural stem cell markers display equally short survival. Poor prognosis subclasses exhibit either markers of proliferation or of angiogenesis and mesenchyme. Analysis …
GSE4271	16530701	GPL97	100	Novel prognostic subclasses of high-grade astrocytoma are identified and discovered to resemble stages in neurogenesis. One tumor class displaying neuronal lineage markers shows longer survival, while two tumor classes enriched for neural stem cell markers display equally short survival. Poor prognosis subclasses exhibit either markers of proliferation or of angiogenesis and mesenchyme. Analysis …
GSE428	12840040	GPL91	11	Data from bonobo fibroblast cell lines described in Genome Research paper ""Comparative analysis of gene expression patterns in human and African great ape cultured fibroblasts""Keywords = African Great Ape, Human Evolution, Fibroblast, Bonobo, Gorilla, Human
GSE4286	17485520	GPL1355	14	The intercalated disc of cardiac myocytes is emerging as a crucial structure in the heart. Loss of intercalated disc proteins like N-cadherin causes lethal cardiac abnormalities, mutations in intercalated disc proteins cause human cardiomyopathy. A comprehensive screen for novel mechanisms in failing hearts demonstrated that expression of the lysosomal integral membrane protein-2 (LIMP-2) is incr…
GSE429	12840040	GPL91	12	Data from gorilla fibroblast cell lines described in Genome Research paper ""Comparative analysis of gene expression patterns in human and African great ape cultured fibroblasts""Keywords = African Great Ape, Human Evolution, Fibroblast, Bonobo, Gorilla, Human
GSE4290	16616334	GPL570	180	mRNA expression data were collected from patients with brain tumor to improve diagnostic of gliomas on molecular level.
GSE430	12824457	GPL96	14	Molecular analysis of the effect left ventricular assist device (LVAD) support has on congestive heart failure patients.Keywords = Congestive heart failure, left ventricular assist device, eNOS, gene, dimethylarginine dimethylaminohydrolase
GSE4302	17898169	GPL570	118	We collected airway epithelial brushings for microarray analysis from 42 asthmatics and two control groups â 28 healthy subjects and 16 smokers. A subgroup of 32 asthmatics completed a randomized placebo-controlled trial of fluticasone propionate in which collection of brushings was repeated after 1 week of treatment.
GSE4307	16547197	GPL1261	20	The inner cell mass (ICM) of the early blastocyst at E3.5, a source of ES cell derivation, is a morphologically homogeneous population of undifferentiated pluripotent cells that give rise to all embryonic lineages. The immediate application of the newly developed V1V3 method to single cells in this stage of mouse embryos revealed the presence of two populations of cells, one with primitive endode…
GSE4308	16547197	GPL1261	16	A systems-level understanding of a small but essential population of cells in development or adulthood (e.g., somatic stem cells) requires accurate quantitative monitoring of genome-wide gene expression, ideally from single cells. We report here a strategy to globally amplify mRNAs from single cells for highly quantitative high-density oligonucleotide microarray analysis that combines a small num…
GSE4309	16547197	GPL1261	36	This SuperSeries is composed of the following subset Series:GSE4307: Expression data from single cells from ICMs of mouse blastocysts at E3.5GSE4308: Expression data for validation of single cell cDNA amplification method (V1V3 method)
GSE4310	-	GPL81	33	Time course study of lung development in normal oxygen and 10% oxygen conditions in order to study the relationship between oxidant stress and gene expression changes in the developing lung around birth. Comparison to normal liver as control tissue not under oxidant stress.
GSE4324	16714546	GPL339	48	The goal of this study was to examine whether immune responses to Plasmodium chabaudi infection differ between the sexes and are altered by the presence of gonadal steroids. Gonadally-intact males were more likely than intact females to die following P. chabaudi infection, exhibit slower recovery from infection-associated weight loss, hypothermia, and anemia, have reduced IFNÎ³-associated gene ex…
GSE4330	16582907	GPL81	21	Microarray time-course of mouse myotubes transduced with the transcriptional co-activator PGC-1alpha, which is known to induce mitochondrial biogenesis in muscle cells.
GSE4330	16582907	GPL82	21	Microarray time-course of mouse myotubes transduced with the transcriptional co-activator PGC-1alpha, which is known to induce mitochondrial biogenesis in muscle cells.
GSE4330	16582907	GPL83	21	Microarray time-course of mouse myotubes transduced with the transcriptional co-activator PGC-1alpha, which is known to induce mitochondrial biogenesis in muscle cells.
GSE4342	16877703	GPL96	45	Eleven NSCLC cell lines with widely divergent gefitinib sensitivities were compared using gene expression. Genes associated with gefitinib response were used to classify additional NSCLC lines with unknown gefitnib sensitivity.A subset of the test set data was tested for gefitinib sensitivity, and results correlated strongly with the gene expression-based predictionsAll eleven training set lines,…
GSE4342	16877703	GPL97	18	Eleven NSCLC cell lines with widely divergent gefitinib sensitivities were compared using gene expression. Genes associated with gefitinib response were used to classify additional NSCLC lines with unknown gefitnib sensitivity.A subset of the test set data was tested for gefitinib sensitivity, and results correlated strongly with the gene expression-based predictionsAll eleven training set lines,…
GSE4356	16651409	GPL81	27	Deregulated expression of the Myc transcription factor is a frequent causal mutation in human cancer. Thousands of putative Myc target genes have been identified in in vitro studies, indicating that Myc exerts highly pleiotropic effects within cells and tissues. However, the complexity and diversity of Myc gene targets has confounded attempts at identifying which of these genes are the critical t…
GSE4386	17325502	GPL570	40	Anesthetic gases elicit organ protection in patients undergoing coronary artery bypass graft (CABG) surgery. This study aimed at identifying myocardial transcriptional phenotypes and anesthetic-induced changes in gene expression to predict cardiovascular biomarkers and cardiac function after off-pump CABG.
GSE4392	16932341	GPL96	16	B-cell chronic lymphocytic leukemia (B-CLL) is a heterogenous disease with a highly variable clinical course and analysis of ZAP-70 and CD38 expression on B-CLL cells allowed for identification of patients with good (ZAP-70-CD38-), intermediate (discordant expression of ZAP-70 and CD38) and poor (ZAP-70+CD38+) prognosis. In an attempt to identify a molecular basis that may underly this diverse cl…
GSE4411	-	GPL1261	11	In skeletal muscle, the pattern of electrical activity regulates the expression of proteins involved in synaptic transmission, contraction and metabolism. Disruptions in electrical activity, resulting from prolonged bed-rest, cast-immobilization or trauma, inevitably lead to muscle atrophy. The mechanisms that regulate muscle atrophy are poorly understood, but it seems likely that changes in gene…
GSE4412	15374961	GPL97	85	Diffuse infiltrating gliomas are the most common primary brain malignancy found in adults, and Glioblastoma multiforme, the highest grade glioma, is associated with a median survival of 7 months. Transcriptional profiling has been applied to 85 gliomas from 74 patients to elucidate glioma biology, prognosticate survival, and define tumor sub-classes. These studies reveal that transcriptional prof…
GSE4412	15374961	GPL96	85	Diffuse infiltrating gliomas are the most common primary brain malignancy found in adults, and Glioblastoma multiforme, the highest grade glioma, is associated with a median survival of 7 months. Transcriptional profiling has been applied to 85 gliomas from 74 patients to elucidate glioma biology, prognosticate survival, and define tumor sub-classes. These studies reveal that transcriptional prof…
GSE4418	-	GPL1355	45	Adverse effects of statins include skeletal muscle toxicity; Type II glycolytic fibers are more senstive to statin damage; exercise exacerbates statin muscle degeneration. We used a well-characterized rat model of statin-induced muscle degeneration, at which 1.0 mg/kg/day (high dose) cerivastatin produces mild to moderate histological degeneration.We used microarrays to detail the global programm…
GSE4425	16595739	GPL96	14	Background: Moderate hypothermia (32oC for 12 â 72 hours) has therapeutic applications, but the mechanisms by which it affects cellular function are unclear. We tested the hypothesis that moderate hypothermia produces broad changes in gene expression by human cells at the level of mRNA.Methods: Acute monocytic leukemia THP-1 cells were incubated under control conditions (37oC) or moderate hypot…
GSE443	12970564	GPL91	11	Leprosy presents as a clinical and immunological spectrum of disease. With the use of gene expression profiling, we observed that a distinction in gene expression correlates with and accurately classifies the clinical form of the disease. Genes belonging to the leukocyte immunoglobulin-like receptor (LIR) family were significantly up-regulated in lesions of lepromatous patients suffering from the…
GSE444	14996990	GPL91	10	The raw data are presented. The computations in the manuscript were based on the fold-changes reported by the MAS 4.0 software, not on ratios taken from raw data
GSE4452	16616336	GPL570	65	Samples in this series are pre-treatment bone marrow aspirates from multiple myeloma patients
GSE4463	16291736	GPL339	30	This SuperSeries is composed of the following subset Series:GSE1049: Cell Culture A and B chips EOMGSE1052: Cell Culture A and B chips leg
GSE4463	16291736	GPL340	30	This SuperSeries is composed of the following subset Series:GSE1049: Cell Culture A and B chips EOMGSE1052: Cell Culture A and B chips leg
GSE4475	16760442	GPL96	221	The distinction between the Burkitt lymphoma and diffuse large B-cell lymphoma is imprecise using current diagnostic criteria. We applied transcriptional and genomic profiling to molecularly define Burkitt lymphoma. Gene expression profiling employing Affymetrix GeneChips (U133A) was performed in 220 mature aggressive B-cell lymphomas, including a core group of eight Burkitt lymphomas, which fulf…
GSE4479	16931309	GPL1261	10	Lymphocytes are adversely affected during sepsis. Some CD4+ splenocytes undergo apoptosis while others become Th2 polarized. The molecular determinants of these phenotypic changes are not known. Here we compare the transcriptional response of septic CD4 splenocytes to CD4 splenocytes from sham-manipulated animals 6h after sepsis and identify an early transcriptional component to the septic CD4+ s…
GSE448	12907719	GPL91	12	The transcriptional response to 50 J/m2 of UV-light (254 nm) was assessed with HGU95AV2 Affymetrix probe arrays at 6, 12, 18 and 24 hours after exposure. Mock-treated samples were assessed at 6 and 24 hours.
GSE4481	-	GPL1261	18	C-type natriuretic peptide (CNP) has been recently identified as an important anabolic regulator of endochondral bone growth, but the molecular mechanism mediating these effects are not completely understood. Here we demonstrate that CNP activates the p38 MAP kinase pathway in chondrocytes and that pharmacological inhibition of p38 blocks the anabolic effects of CNP in a tibia organ culture syste…
GSE4483	16507782	GPL570	12	This SuperSeries is composed of the following subset Series:GSE3045: Astrocytic response to hypoxiaGSE3051: HeLa response to hypoxia
GSE4488	16728643	GPL570	16	While identification of genes mutated in high penetrance tumor predisposition syndromes has been a success story, much less progress has been made in characterizing the genetic basis of low penetrance tumor susceptibility. Combining recently introduced chip-based technologies with traditional genealogy work we have identified inactivating germline mutations in patients with pituitary adenoma pred…
GSE449	12907719	GPL91	12	The transcriptional response to 10 J/m2 of UV-light (254 nm) was assessed with HGU95AV2 Affymetrix probe arrays at 6, 12, 18 and 24 hours after exposure. Mock-treated samples were assessed at 6 and 24 hours.
GSE4494	-	GPL85	59	The objective of this study was to test the hypothesis that innate differences in gene expression in the brain couldcontribute to the differences in alcohol drinking or response to alcohol between adult male inbred alcohol-preferring (iP) and -non-preferring(iNP) rats. Gene expression was determined in the nucleus accumbens (ACB), amygdala (AMYG), frontal cortex (FC), caudate-putamen (CPU) andhip…
GSE4498	17115125	GPL570	22	Modification of Gene Expression of the Small Airway Epithelium in Response to Cigarette SmokingThe earliest morphologic evidence of changes in the airways associated with chronic cigarette smoking is in the small airways. To help understand how smoking modifies small airway structure and function, we developed a strategy using fiberoptic bronchoscopy and brushing to sample the human small airway …
GSE4513	-	GPL81	10	Cystic fibrosis, the most commonly inherited lethal pulmonary disorder in Caucasians, is caused by mutations in the cystic fibrosis transmembrane conductance regulator gene (CFTR). To identify genomic responses to the presence or absence of CFTR in pulmonary tissues in vivo, microarray analyses of lung mRNAs were performed on whole lung tissue from mice lacking (CFTR(-)) or expressing mouse CFTR …
GSE4514	16809437	GPL1355	30	In rodent models, phthalate exposure alters both the fetal and pubertal testis, but the resulting histopathological changes are divergent. This suggests that the underlying molecular and cellular phthalate mechanism may be age-dependent. Using genome-wide expression profiling of acutely-exposed rats, the initial molecular response in pubertal rat testis following in vivo phthalate exposure was de…
GSE4518	17566077	GPL1261	12	Activation of the vascular endothelium with cytokines such as TNF is widely used to study the role of the vasculature in proinflammatory disease. To gain insight into mechanisms of prolonged vascular endothelial activation we compared changes in gene expression induced by continuous activation in stable tmTNFalpha expressing cells with changes due to acute TNFalpha challenge in vitro. Affymetrix …
GSE4525	16973580	GPL571	10	Two cell lines, BL41K3 and BJABK3, were chosen to perform a comprehensive screen for EBNA-2 target genes. Both cell lines are EBV negative B-cell lines and express a chimeric EBNA-2 protein fused to the hormone binding domain of the estrogen receptor (ER/EBNA-2). The cells are propagated in the absence of hormone 31,36. Estrogen stimulation activates ER/EBNA-2, which in turn activates well known …
GSE4532	-	GPL571	12	We used two RNA samples that differed only by a set of three hemoglobin transcripts to compare microarray cross-hybridization between two target preparation protocols. We found widespread cross-hybridization using standard cRNA target but substantially less cross-hybridization using cDNA target.
GSE4536	16697959	GPL570	101	The concept of tumor stem cells (TSCs) provides a new paradigm for understanding tumor biology, although it remains unclear whether TSCs will prove to be a more robust model than traditional cancer cell lines. We demonstrate marked phenotypic and genotypic differences between primary human tumor-derived TSCs and their matched glioma cell lines. TSCs derived directly from primary glioblastomas har…
GSE4537	16633343	GPL81	12	Two key paradigms for examining activity-dependent development of primary visual cortex (V1) involve either reduction of activity in both eyes via dark-rearing (DR) or imbalance of activity between the two eyes via monocular deprivation (MD).Combining DNA microarray analysis with computational approaches, RT-PCR, immunohistochemistry and physiological imaging, we find that DR leads to (i) upregul…
GSE4537	16633343	GPL83	12	Two key paradigms for examining activity-dependent development of primary visual cortex (V1) involve either reduction of activity in both eyes via dark-rearing (DR) or imbalance of activity between the two eyes via monocular deprivation (MD).Combining DNA microarray analysis with computational approaches, RT-PCR, immunohistochemistry and physiological imaging, we find that DR leads to (i) upregul…
GSE4537	16633343	GPL82	12	Two key paradigms for examining activity-dependent development of primary visual cortex (V1) involve either reduction of activity in both eyes via dark-rearing (DR) or imbalance of activity between the two eyes via monocular deprivation (MD).Combining DNA microarray analysis with computational approaches, RT-PCR, immunohistochemistry and physiological imaging, we find that DR leads to (i) upregul…
GSE4550	-	GPL96	18	MPTP treated Macaca fascicularis prefrontal cortices compared to saline treated and untreated controls
GSE4551	17506860	GPL341	12	To identify novel Nurr1 target genes we have used microarrays strategies in rat midbrain primary cultures, enriched in dopaminergic neurons, by the action of basic fibroblast growth factor (bFGF, 20ng/ml) and Sonic hedgedog (SHH), following upregulation of Nurr1 expression by depolarization.To this aim we have treated the cultures after 9 days in vitro for 2h with high KCl and collected 30 min or…
GSE4554	17047040	GPL570	84	Samples were taken from colorectal cancers in surgically resected specimens in 84 colorectal cancer patients. The expression profiles were determined using Affymetrix Human Genome U133 Plus 2.0 arrays. Comparison between the sample groups allow to identify a set of discriminating genes between MSI and MSS cancers and, furthermore, to determine the distinct characteristics of proximal and distal M…
GSE4561	-	GPL571	20	NOX1 gene is member of the NADPH-dependent superoxide producing enzyme family. It generates reactive oxygen species (ROS) in regulated manner in response to growth factors, cytokines and calcium signal. Low levels of ROS play role in many processes including cell proliferation, inflammatory response and mitogenesis. NOX1 over-expression in colon cancer cell lines as well as surgical samples sugge…
GSE4563	16697960	GPL96	15	A673 Ewing's sarcoma cells, with inducible EWS/FLI cDNA, harboring the EF-2-RNAi retrovirus, induced (or uninduced) for the indicated time period.
GSE4565	16697960	GPL96	23	This SuperSeries is composed of the following subset Series:GSE4560: A673 Stable-KnockdownGSE4563: A673 inducible-rescue experiment
GSE4573	16885343	GPL96	130	Gene signatures were derived to separate high risk patients from low risk ones..
GSE4587	16251803	GPL570	18	To gain insights into the genetic profile of every stage of the melanoma progression pathway, and to determine to what extent these profiles are similar or distinct, we performed whole-genome expression profiling of tissue specimens representing normal skin, benign and atypical nevi, and early and advanced-stage melanomas. The results of this study provide first-time evidence that significant mol…
GSE4588	-	GPL570	49	Objective: Gene expression studies performed on PBMC from systemic lupus erythematosus (SLE) patients provided strong evidence of a type I interferon signature, underscoring the potential role of these cytokines in the physiopathology of SLE. In this work, we performed microarray analyses of differential gene expression using purified CD4 T and B cells sorted from SLE PBMC. In order to discrimina…
GSE459	-	GPL76	15	Gene expression profiles of kidney tissue from control-fed 5-month-old, control-fed 30-month-old and calorie restricted 30 month-old C57BL/6 mice.Keywords = kidney, aging, calorie restriction
GSE459	-	GPL75	15	Gene expression profiles of kidney tissue from control-fed 5-month-old, control-fed 30-month-old and calorie restricted 30 month-old C57BL/6 mice.Keywords = kidney, aging, calorie restriction
GSE4592	16682498	GPL96	10	Celiac disease is an intestinal inflammatory disorder induced by dietary gluten in genetically susceptible individuals. The mechanisms underlying the massive expansion of interferon gâproducing intraepithelial cytotoxic T lymphocytes (CTLs) and the destruction of the epithelial cells lining the small intestine of celiac patients have remained elusive. We report massive oligoclonal expansions of…
GSE460	-	GPL81	12	Investigation into murine dermal burn wound.Mouse thermal injury induced, and skin excised at 0 hours, 2 hours, 3 days and 14 days post-injury.
GSE4600	16682435	GPL570	12	Rett syndrome (RTT) is an X-linked dominant neurodevelopmental disorder caused by mutations in MECP2, encoding methyl-CpG binding protein 2. MeCP2 is a transcriptional repressor elevated in mature neurons and is predicted to be required for neuronal maturation by regulating multiple target genes. Identifying primary gene targets in either Mecp2-deficient mice or human RTT brain has proven to be d…
GSE4602	17361228	GPL570	46	CD34-positive and negative fractions were used for genomic DNA preparation, which was hybridized to HGU133 Plus 2.0 arrays.
GSE4607	17374846	GPL570	123	Goal of the experiment: To identify correlated genes, pathways and groups of patients with systemic inflammatory response syndrome and septic shock that is indicative of biologically important processes active in these patients.Background: We measured gene expression levels and profiles of children with systemic inflammatory response syndrome (SIRS) and septic shock as a means for discovering pat…
GSE4608	17361228	GPL570	22	CD34-positive fractions were used for mRNA preparation, which was hybridized to HGU 133 Plus 2.0 arrays.
GSE4610	17361228	GPL570	68	This SuperSeries is composed of the following subset Series:GSE4602: AML genome hybridization to HGU133 Plus 2.0GSE4608: AML mRNA hybridization to HGU133 Plus 2.0
GSE4612	16618719	GPL339	12	We studied the molecular mechanisms of hepatocellular carcinoma (HCC) initiation and promotion using the Mdr2-knockout (Mdr2-KO) mice at pre-cancerous stages of liver disease. These mice lack the liver-specific P-glycoprotein responsible for phosphatidylcholine transport across the canalicular membrane. Portal inflammation ensues at an early age followed by the development of HCC between the ages…
GSE4616	17003243	GPL81	12	We investigated the effects of diabetes, physical training, and their combination on the gene expression of cardiac muscle. Mice were divided to control (C), training (T), streptozotocin-induced diabetic (D), and diabetic training (DT) groups. Training groups performed 1, 3, or 5 weeks of endurance training on a motor-driven treadmill. Muscle samples from T and DT groups together with respective …
GSE4619	16527891	GPL570	66	In order to gain insight into the poorly understood pathophysiology of the myelodysplastic syndromes (MDS), we have determined the gene expression profiles of the CD34+ cells of 55 MDS patients using the Affymetrix GeneChip U133 Plus2.0 platform
GSE4623	17475010	GPL81	12	Background. Nuclear factor I-A (NFI-A), a phylogenetically conserved transcription/replication protein, plays a crucial role in mouse brain development. Previous studies showed that disruption of the Nfia gene in mice leads to perinatal lethality, corpus callosum agenesis, and hydrocephalus. Results. To identify potential NFI-A target genes involved in the observed tissue malformations, we analyz…
GSE4636	16574741	GPL96	18	We have previously identified a family of novel androgen receptor (AR) ligands that, upon binding, enable AR to adopt structures distinct from that observed in the presence of canonical agonists. In this report, we describe the use of these compounds to establish a relationship between AR structure and biological activity with a view to defining a rational approach with which to identify useful S…
GSE4636	16574741	GPL97	18	We have previously identified a family of novel androgen receptor (AR) ligands that, upon binding, enable AR to adopt structures distinct from that observed in the presence of canonical agonists. In this report, we describe the use of these compounds to establish a relationship between AR structure and biological activity with a view to defining a rational approach with which to identify useful S…
GSE4646	16958858	GPL96	23	We examined the adherence-mediated signaling of meningococci to human cells by comparing gene expression profiles of primary human umbilical vein endothelial cells (HUVEC) infected by piliated and adherent wild-type (WT), frpC/frpA-deficient mutant, or the non-adherent (ÎpilD) N. meningitidis MC58 bacteria defective in production of the type IV pilus, respectively. Surprisingly, no significant d…
GSE4648	16845475	GPL82	66	We report a genome-wide survey of early responses of the mouse heart transcriptome to acute myocardial infarction (AMI). For three regions of the left ventricle (LV), namely ischemic/infarcted tissue (IF), the surviving LV free wall (FW) and the interventricular septum (IVS), 36,899 transcripts were assayed at six time points from 15 min to 48 h post-AMI in both AMI and sham surgery mice. For eac…
GSE4648	16845475	GPL81	66	We report a genome-wide survey of early responses of the mouse heart transcriptome to acute myocardial infarction (AMI). For three regions of the left ventricle (LV), namely ischemic/infarcted tissue (IF), the surviving LV free wall (FW) and the interventricular septum (IVS), 36,899 transcripts were assayed at six time points from 15 min to 48 h post-AMI in both AMI and sham surgery mice. For eac…
GSE4648	16845475	GPL83	66	We report a genome-wide survey of early responses of the mouse heart transcriptome to acute myocardial infarction (AMI). For three regions of the left ventricle (LV), namely ischemic/infarcted tissue (IF), the surviving LV free wall (FW) and the interventricular septum (IVS), 36,899 transcripts were assayed at six time points from 15 min to 48 h post-AMI in both AMI and sham surgery mice. For eac…
GSE4655	16940433	GPL570	18	computational analysis of transcriptomic information during erythroid development
GSE466	12133862	GPL81	10	Despite over 3,000 articles published on dystrophin in the last 15 years, the reasons underlying the progression of the human disease, differential muscle involvement, and disparate phenotypes in different species are not understood. The present experiment employed a screen of 12,488 mRNAs in 16-wk-old mouse mdx muscle at a time when the skeletal muscle is avoiding severe dystrophic pathophysiolo…
GSE4667	15962335	GPL97	35	There is a consistent variation in the response of different skeletal muscle groups to mutations in genes known to cause muscular dystrophy, yet these muscles appear histologically similar. To better understand these phenotypic differences, we analyzed gene expression patterns in control muscle specimens obtained from four sites at autopsy: deltoid, quadriceps, gastrocnemius, and tibialis anterio…
GSE4667	15962335	GPL96	35	There is a consistent variation in the response of different skeletal muscle groups to mutations in genes known to cause muscular dystrophy, yet these muscles appear histologically similar. To better understand these phenotypic differences, we analyzed gene expression patterns in control muscle specimens obtained from four sites at autopsy: deltoid, quadriceps, gastrocnemius, and tibialis anterio…
GSE4668	14610279	GPL96	34	To obtain comprehensive information on 17beta-estradiol (E2) sensitivity of genes that are inducible or suppressible by this hormone, we designed a method that determines ligand sensitivities of large numbers of genes using DNA microarray and a set of simple Perl computer scripts implementing the standard metric statistics, and employed it to characterize effects of low (0-100 pM) concentrations …
GSE467	12433947	GPL85	36	To further understand molecular mechanisms underlying skeletal muscle hypertrophy, expression profiles of translationally and transcriptionally regulated genes were characterized following an acute bout of maximally activated eccentric contractions. Experiments demonstrated that translational mechanisms contribute to acute gene expression changes following high resistance contractions with two ca…
GSE4671	16868072	GPL1261	28	The white adipose tissue (WAT) rapidly loses mass when mice are fed a diet containing trans-10, cis-12 conjugated linoleic acid (t10c12 CLA). A microarray analysis of WAT due to CLA feeding was performed to better define the processes and genes involved. WAT weight decreased by ca. 80% over 17 days of feeding a 0.5% t10c12 CLA diet. The lipid volume decreased by 90% and the number of adipocytes a…
GSE4675	17013924	GPL339	23	Abnormal development of the prefrontal cortex (PFC) is associated with a number of neuropsychiatric disorders that have an onset in childhood or adolescence. Although the basic laminar structure of the PFC is established in utero, extensive remodeling continues into adolescence. To map the overall pattern of changes in cortical gene transcripts during post-natal development, we made serial measur…
GSE4678	16882888	GPL339	10	Familial hypertrophic cardiomyopathy (FHC) is a disease characterized by ventricular hypertrophy, fibrosis, and aberrant systolic and/or diastolic function. We previously developed two transgenic mouse models that carry FHC associated mutations in alpha-tropomyosin (TM): FHC alpha-TM175 mice show patchy areas of mild ventricular disorganization and limited hypertrophy; whereas FHC alpha-TM180 mic…
GSE4679	16767105	GPL339	70	We present an integrated approach to identify genetic mechanisms that control self-renewal in mouse embryonic stem (ES) cells. Short hairpin RNA (shRNA) techniques are employed to down regulate a set of gene-products whose expression patterns suggest self-renewal regulatory functions. We focus on transcriptional regulators and identify seven molecules whose shRNA-mediated depletion induces differ…
GSE4679	16767105	GPL340	70	We present an integrated approach to identify genetic mechanisms that control self-renewal in mouse embryonic stem (ES) cells. Short hairpin RNA (shRNA) techniques are employed to down regulate a set of gene-products whose expression patterns suggest self-renewal regulatory functions. We focus on transcriptional regulators and identify seven molecules whose shRNA-mediated depletion induces differ…
GSE4688	-	GPL201	16	Peripheral blood stem and progenitor cells (PBSC) are widely used for autologous and allogeneic hematopoietic stem cell transplantation. PBSC can be mobilized into the peripheral blood using cytokines, cytotoxic chemotherapy or a combination of both. Granulocyte colony stimulating factor (G-CSF) has become the most commonly administered cytokine for PBSC mobilization because of its high potency a…
GSE469	12023284	GPL81	54	Temporal expression profiling was utilized to define transcriptional regulatory pathways in vivo in a mouse muscle regeneration model. Potential downstream targets of MyoD were identified by temporal expression, promoter data base mining, and gel shift assays; Slug and calpain 6 were identified as novel MyoD targets. Slug, a member of the snail/slug family of zinc finger transcriptional repressor…
GSE469	12023284	GPL32	12	Temporal expression profiling was utilized to define transcriptional regulatory pathways in vivo in a mouse muscle regeneration model. Potential downstream targets of MyoD were identified by temporal expression, promoter data base mining, and gel shift assays; Slug and calpain 6 were identified as novel MyoD targets. Slug, a member of the snail/slug family of zinc finger transcriptional repressor…
GSE4698	16899601	GPL96	60	Purpose: In childhood acute lymphoblastic leukemia (ALL), approximately 25% of patients suffer from relapse. In recurrent disease, despite intensified therapy, overall cure rates of 40% remain unsatisfactory and survival rates are particularly poor in certain subgroups. The probability of long-term survival after relapse is predicted from well-established prognostic factors, i. e. time and site o…
GSE470	-	GPL91	12	The exacerbation of disease in asthmatics has been linked to both exposure to environmental agents as well as to the presence of virus in airways, particularly rhinovirus. The hypothesis tested in these experiments is that differences in gene expression profiles in epithelial cells derived from asthmatic and normal airways can be linked to enhanced responsiveness of the epithelium in its pro-infl…
GSE4702	16929007	GPL341	16	Chronic obstructive pulmonary disease (COPD) is diagnosed by airway obstruction and underlies a group of ailments such as bronchitis, emphysema and often asthma; however, rodent models do not resemble human pathology. Because genetically predisposed spontaneously hypertensive (SH) rats display phenotypes such as systemic inflammation, thrombosis, oxidative stress, and suppressed immune function, …
GSE471	12006673	GPL85	16	The extraocular muscles (EOM) are anatomically and physiologically distinct from other skeletal muscles. EOM are preferentially affected in mitochondrial myopathies, but spared in Duchenne's muscular dystrophy. The anatomical and pathophysiological properties of EOM have been attributed to their unique molecular makeup: an allotype. We used expression profiling to define molecular features of the…
GSE4711	16682651	GPL339	18	Gametes rely heavily on post-transcriptional control mechanisms to regulate their differentiation. In eggs, the storage and selective temporal activation of maternal mRNAs is essential for normal development. In the male, transcription ceases during spermiogenesis necessitating the post-transcriptional regulation of many paternal mRNAs required for spermatid differentiation and spermatozoan funct…
GSE4712	16846716	GPL1261	21	Edema toxin (EdTx), which is a combination of edema factor and a binding moiety (protective antigen), is produced by Bacillus anthracis, the etiological agent of anthrax. EdTx is an adenylyl cyclase enzyme that converts adenosine triphosphate to adenosine-3â,5â-monophosphate, resulting in interstitial edema seen in anthrax patients. We used GeneChip analysis to examine global transcriptional …
GSE4717	16909125	GPL96	12	Glioblastoma, the most aggressive and least treatable form of malignant glioma, is the most common human brain tumor. Although many regions of allelic loss occur in glioblastomas, relatively few tumor suppressor genes have been found mutated at such loci. To address the possibility that epigenetic alterations are an alternative means of glioblastoma gene inactivation, we coupled pharmacological m…
GSE473	-	GPL97	64	This project is based on the hygiene hypothesis that exposure to TB provides a protective mechanism against asthma through specific cytokines and the balance of Th1, Th2 cells. Additionally, expression changes are examined in patients with and without atopy in combination with asthma and PPD status. Expression levels were evaluated in CD4+ cells isolated from peripheral blood of 30 patients. Each…
GSE473	-	GPL96	111	This project is based on the hygiene hypothesis that exposure to TB provides a protective mechanism against asthma through specific cytokines and the balance of Th1, Th2 cells. Additionally, expression changes are examined in patients with and without atopy in combination with asthma and PPD status. Expression levels were evaluated in CD4+ cells isolated from peripheral blood of 30 patients. Each…
GSE4731	16595594	GPL96	16	A time course of the effect of overexpressing GPI-PLD on global gene expression in HepG2 cells was compared to control virus.
GSE4734	17324278	GPL1261	61	Gene expression patterns were determined from five brain regions (bed nucleus of the stria terminalis, hippocampus, hypothalamus, periaqueductal gray, and pituitary gland) in six mouse strains (129S6/SvEvTac, A/J, C57BL/6J, C3H/HeJ, DBA/2J, and FVB/NJ). At least two replicate samples per brain region/strain were analyzed using Affymetrix Mouse Genome 430 2.0 arrays.
GSE4739	16782007	GPL1261	19	The ERK family of MAP kinase plays a critical role in growth factor-stimulated cell cycle progression from G0/G1 to S phase. But, how sustained activation of ERK promotes G1 progression has remained unclear. Here, our systematic analysis on the temporal program of ERK-dependent gene expression shows that sustained activation of ERK is required for induction and maintenance of the decreased expres…
GSE474	16849634	GPL96	24	It has been found that fat oxidation is reduced in the skeletal muscle of obese humans. This study aims to identify the mRNA of proteins involved in fat oxidation that may be reduced in obese and morbidly obese individuals. Information gathered will help in understanding how obesity contributes to cardiovascular disease via insulin resistance.
GSE4745	16855217	GPL85	24	Cardiomyopathy in type 1 diabetic patients is characterized by early onset diastolic and late onset systolic dysfunction. The mechanism underlying development of diastolic and systolic dysfunction in diabetes remains unknown.We used microarrays to detail the ventricle gene expression changes that underly development of diabetic cardiomyopathy. We identified distinct classes of up-regulated genes …
GSE4748	16717116	GPL570	10	A cyanobacterial LPS antagonist prevents endotoxin shock and blocks sustained TLR4 stimulation required for cytokine expression. We report the identification and biologic characterization of an LPS-like molecule extracted from the cyanobacterium Oscillatoria Planktothrix FP1 (CyP).
GSE4753	-	GPL1355	40	Hypoxic-ischemic (HI) injury in the developing brain is a common cause of disability in children, and there are no effective treatments at this time. Exposure to sublethal hypoxic conditions (hypoxic preconditioning) 24 hours prior to hypoxic-ischemic insult is protective in the developing rat model. We have observed protective effects on brain histopathology and on long-term sensory-motor behavi…
GSE4757	-	GPL570	20	Alzheimer's Disease (AD) is a devastating neurodegenerative disorder affecting approximately 4 million people in the U.S. alone. AD is characterized by the presence of senile plaques and neurofibrillary tangles in cortical regions of the brain. These pathological markers are thought to be responsible for the massive cortical neurodegeneration and concomitant loss of memory, reasoning, and often a…
GSE4758	-	GPL1261	24	Parkinsonâs disease (PD) and Dementia with Lewy bodies (DLB) are the two most common examples of synucleinopathies, i.e. human disorders that display intracellular deposition of the Alpha-synuclein (aSYN) protein. The two forms of aSYN deposits, intracellular Lewy bodies and Lewy neurites, are in the PD brain primarily found in the substantia nigra whereas in DLB brains they are diffusely sprea…
GSE4764	16717182	GPL81	15	To gain a comprehensive view of the host response to pathogens within these tissues, we determined the transcriptional profiles of intestinal lymphatic tissue infected with Y. enterocolitica. Expression analysis using Affymetrix GeneChips revealed a complex host response in the Peyerâs patches (PP) and mesenteric lymph nodes (MLN) following oral infection with Y. enterocolitica.
GSE4768	-	GPL1261	18	DNA methylation can contribute to the stable transcriptional silencing of mammalian genes. Oftentimes, these genes are important developmental regulators, and their silencing in cell types where they are not supposed to be active is important for the phenotypic stability of the cells. To identify key developmental regulator genes whose expression in terminally differentiated cells may be inhibite…
GSE4772	-	GPL570	14	This study aims at giving an insight on gene expression in CCAM.
GSE4773	-	GPL570	21	Parkinson's disease is a prevalent neurodegenerative disorder for which there is no cure. The cause of PD symptoms is loss of dopamine neurons in the midbrain, but it is not known why these neurons die. Pesticide exposure is epidemiologically associated with PD, and administration of the organic pesticide rotenone to rats recapitulates most of the behavioral, neurochemical, and neuropathological …
GSE4774	-	GPL1261	15	The Dlx homeobox genes have central roles in controlling patterning and differentiation of the brain and craniofacial primordia. In the brain, loss of Dlx function results in defects in the production, migration and differentiation of GABAergic neurons, that can lead to epilepsy. In the branchial arches, loss of Dlx function leads to craniofacial malformations that include trigeminal axon pathfin…
GSE4776	-	GPL1355	83	It is suggested that the stress induced activation of the HPA axis and associated increases in plasma ACTH and glucocorticoids (corticosterone, B in the rat) are contributing factors in the development of many psychopathologies. However, the circadian fluctuation of the HPA axis activity (characterized by a zenith in the plasma ACTH and B, before the beginning of the active awake state and the na…
GSE478	14594731	GPL81	24	Pulmonary alveoli are complex architectural units thought to undergo endogenous or pharmacologically induced programs of regeneration and degeneration. To study the molecular mechanism of alveoli loss mice were calorie restricted at different timepoints. Lungs were harvested and processed for RNA extraction.
GSE4780	-	GPL570	57	Meningiomas are typically considered a benign tumor that can be cured by complete surgical resection; however, a percentage of patients have recurrent disease, even after apparently complete resections. These patients require additional surgeries, radiation therapy, chemotherapy, or a combination of all three. The ability to recognize these patients prior to recurrence would promote earlier use o…
GSE4788	15329391	GPL32	12	Parkinson's disease pathogenesis proceeds through several phases, culminating in the loss of dopaminergic neurons of the substantia nigra (SN). Although the 1-methyl-4-phenyl-1,2,3,6-tetrahydropyridine (MPTP) model of oxidative SN injury is frequently used to study degeneration of dopaminergic neurons in mice and non-human primates, an understanding of the temporal sequence of molecular events fr…
GSE4799	16740658	GPL1261	15	GDNF-regulated gene expression was studied in cultures of actively self-renewing spermatogonial stem cells established from 6 day old male mice. GDNF is the essential growth factor regulating mouse spermatogonial stem cell self-renewal. Using a serum-free chemically defined culture system that supports mouse spermatogonial stem cell self-renewal for extended periods of time, GDNF-regulated genes …
GSE480	-	GPL81	20	This study examines the relationship between sleep apnea and glucose metabolism. Physiological studies have demonstrated that 5 days of exposure to intermittent hypoxia (similar to what occurs with sleep apnea) leads to significant improvements in glucose tolerance. Therefore, this study investigates the hypothesis that intermittent hypoxia may lead to upregulation of some novel peptide(s) that h…
GSE4810	17105752	GPL339	12	Fundic mucosa gene expression in wildtype vs gastrin knockout, gastrin replaced gastrin KO and gastrin-CCK double knockout miceFundic mucosal scraping RNA were isolated from WT, Gastrin Knockout, Gastrin replaced KO and Gastrin-CCK double knockout mice. Targets from three biological replicates of each were generated and the expression profiles were determined using Affymetrix murine 430A arrays. …
GSE4816	-	GPL1261	12	The long term objective is to create an encyclopedia of the expression levels of all genes in multiple components of the developing bladder. The central thesis is straightforward. The combination of laser capture microdissection (LCM) plus microarray analysis offers a powerful, efficient and effective method for the creation of a global gene expression atlas of the developing bladder. Microarrays…
GSE4818	-	GPL1261	21	The overall objective of this proposal is to map the temporal and spatial dynamics of gene expression in the fetal mouse testis at key developmental timepoints. Urogenital tract malformations are the most common birth defects in males and their incidence together with other male reproductive health concerns such as reduced fertility and testicular cancer are reportedly on the rise in the human po…
GSE482	-	GPL83	10	Hypoxia can induce vasoconstriction followed by vascular remodeling including hypertrophy and hyperplasia of pulmonary vascular smooth muscle and proliferation of endothelial cells. The goal of this project is to elucidate the genes involved in vascular remodeling following pulmonary hypertension. Total RNA was isolated from lungs of normoxic and hypoxic treated animals.
GSE482	-	GPL82	11	Hypoxia can induce vasoconstriction followed by vascular remodeling including hypertrophy and hyperplasia of pulmonary vascular smooth muscle and proliferation of endothelial cells. The goal of this project is to elucidate the genes involved in vascular remodeling following pulmonary hypertension. Total RNA was isolated from lungs of normoxic and hypoxic treated animals.
GSE4821	-	GPL341	79	The aim of this study was to investigate whether the differences in memory decline associated with aging are a result of differences in gene expression. We first categorized age-unimpaired and age-impaired rats based on their performance in the Morris water maze, when compared to young rats. Then we isolated messenger RNA from the dentate gyrus of the hippocampus of each animal to interrogate Aff…
GSE4824	16843264	GPL96	79	These arrays are used for various projects
GSE4824	16843264	GPL97	79	These arrays are used for various projects
GSE4830	16823376	GPL81	16	Gene expression microarrays have made a profound impact in biomedical research. The diversity of platforms and analytical methods has made comparison of data from multiple platforms very challenging. In this study, we describe a framework for comparisons across platforms and laboratories. We have attempted to include nearly all the available commercial and âin-houseâ platforms. Using probe se…
GSE4840	16827748	GPL97	15	The molecular biology of metastatic potential in melanoma has been studied many times previously and changes in the expression of many genes have been linked to metastatic behaviour. What is lacking is a systematic characterization of the regulatory relationships between genes whose expression is related to metastatic potential. Such a characterization would produce a molecular taxonomy for melan…
GSE4840	16827748	GPL96	15	The molecular biology of metastatic potential in melanoma has been studied many times previously and changes in the expression of many genes have been linked to metastatic behaviour. What is lacking is a systematic characterization of the regulatory relationships between genes whose expression is related to metastatic potential. Such a characterization would produce a molecular taxonomy for melan…
GSE4841	16827748	GPL96	30	The molecular biology of metastatic potential in melanoma has been studied many times previously and changes in the expression of many genes have been linked to metastatic behaviour. What is lacking is a systematic characterization of the regulatory relationships between genes whose expression is related to metastatic potential. Such a characterization would produce a molecular taxonomy for melan…
GSE4843	16827748	GPL570	45	The molecular biology of metastatic potential in melanoma has been studied many times previously and changes in the expression of many genes have been linked to metastatic behaviour. What is lacking is a systematic characterization of the regulatory relationships between genes whose expression is related to metastatic potential. Such a characterization would produce a molecular taxonomy for melan…
GSE4845	16827748	GPL97	15	The molecular biology of metastatic potential in melanoma has been studied many times previously and changes in the expression of many genes have been linked to metastatic behaviour. What is lacking is a systematic characterization of the regulatory relationships between genes whose expression is related to metastatic potential. Such a characterization would produce a molecular taxonomy for melan…
GSE4845	16827748	GPL96	45	The molecular biology of metastatic potential in melanoma has been studied many times previously and changes in the expression of many genes have been linked to metastatic behaviour. What is lacking is a systematic characterization of the regulatory relationships between genes whose expression is related to metastatic potential. Such a characterization would produce a molecular taxonomy for melan…
GSE4845	16827748	GPL570	45	The molecular biology of metastatic potential in melanoma has been studied many times previously and changes in the expression of many genes have been linked to metastatic behaviour. What is lacking is a systematic characterization of the regulatory relationships between genes whose expression is related to metastatic potential. Such a characterization would produce a molecular taxonomy for melan…
GSE485	-	GPL81	24	The murine pulmonary response is strain specific. Susceptible strains such as C57BL6/J experience an inflammatory response followed by progressive lung disease. Resistant strains such as Balb/c do not experience significant degrees of inflammation or fibrosis. This study aims to determine the genetic basis of sensitivity differences between strains
GSE4854	16823376	GPL81	16	Gene expression microarrays have made a profound impact in biomedical research. The diversity of platforms and analytical methods has made comparison of data from multiple platforms very challenging. In this study, we describe a framework for comparisons across platforms and laboratories. We have attempted to include nearly all the available commercial and in house platforms. Using probe sequence…
GSE4858	16877544	GPL96	12	To explore which signaling pathways are of importance in maintenance of human epidermal keratinocytes we have established a protocol which allows single cell expression profiling. The protocol was applied to cultured human epidermal keratinocytes, and single cell cDNA libraries from stem and transit amplifying cells were identified based on the expression of known SC markers, MCSP and Dll1.We use…
GSE4858	16877544	GPL97	12	To explore which signaling pathways are of importance in maintenance of human epidermal keratinocytes we have established a protocol which allows single cell expression profiling. The protocol was applied to cultured human epidermal keratinocytes, and single cell cDNA libraries from stem and transit amplifying cells were identified based on the expression of known SC markers, MCSP and Dll1.We use…
GSE4866	17363114	GPL1261	10	Mitochondrial DNA (mtDNA) mutations may contribute to aging and age-related disorders. Previously, we created mice expressing a proofreading-deficient version of the mtDNA polymerase gamma (Polg) which accumulate age-related mtDNA mutations and display premature aging. Here we performed microarray gene expression profiling to identify mtDNA mutation-responsive genes in the cochlea of aged mitocho…
GSE487	12808002	GPL341	44	Summary: The liver is the major site of gluconeogenesis, fat processing and distribution, as well as drug and xenobiotic metabolism. Altered gene expression in the liver is centrally invovled in both the immuosuppressive and the energetic actions of corticosteroids.Hypothesis: That pharmacodynamics can be derived from expression profiling data.Specific Aim: The aim of this project is to identify …
GSE487	12808002	GPL85	47	Summary: The liver is the major site of gluconeogenesis, fat processing and distribution, as well as drug and xenobiotic metabolism. Altered gene expression in the liver is centrally invovled in both the immuosuppressive and the energetic actions of corticosteroids.Hypothesis: That pharmacodynamics can be derived from expression profiling data.Specific Aim: The aim of this project is to identify …
GSE4870	16855283	GPL81	13	Tissue-specific comparison of gene expression levels in T65H translocation mice, either with or without uniparental duplications of Chrs 7 & 11. Identification of highly differentially expressed transcripts.
GSE4870	16855283	GPL83	11	Tissue-specific comparison of gene expression levels in T65H translocation mice, either with or without uniparental duplications of Chrs 7 & 11. Identification of highly differentially expressed transcripts.
GSE4870	16855283	GPL82	13	Tissue-specific comparison of gene expression levels in T65H translocation mice, either with or without uniparental duplications of Chrs 7 & 11. Identification of highly differentially expressed transcripts.
GSE488	-	GPL85	12	In the field, adult male rodents are more frequently infected with hantaviruses than females. Early data suggests that sex steroid hormones modulate sex differences in host immune response. This project focuses on elucidating sex differences in gene expression in the lungs of infected males 15 and 40 days post infection with Seoul virus (naturally occurring hantavirus in Norway rats) relative to …
GSE4885	-	GPL96	12	This experiment series addresses the role of coactivator SRC-1/NcoA-1 for the induction of interleukin-6 (IL-6) target genes in HepG2 cells. For that purpose, HepG2 human hepatocellular carcinoma cells were manipulated to stably express an shRNA that knocks down SRC-1 expression yielding the HepG2-âSrc1 cells. Either unmanipulated HepG2 or HepG2-âSrc1 cells were then treated for various perio…
GSE4888	16306079	GPL570	27	To examine the possibility that biochemicalor molecular signatures of endometrium may prove to be more useful, we have investigatedwhole genome molecular phenotyping (54,600 genes/ESTs) of this tissue sampled across thecycle in 28 normo-ovulatory women, using high-density oligonucleotide microarrays. The results demonstratethat endometrial samples obtained by two different sampling techniques (bi…
GSE490	15642798	GPL85	51	The aim of this project is to identify distinct temporal patterns of RNA expression in the skeletal muscle of rats following a bolus dose of the corticosteroid methylprednisolone. 51 RG_U34A chips were used over 17 time points.
GSE491	-	GPL85	28	Necrotizing Enterocolitis (NEC) is an inflammation causing injury to the bowel in newborns. This project uses a rodent model that mimics the intestinal pathological changes seen in NEC to study the effect of formula feeding and hypoxia on NEC development
GSE4917	16690749	GPL96	24	This series contain time course microarray data from MCF10A-Myc cells treated with either ethanol or Dexamethasone for 30 min, 2 hr, 4 hr, and 24 hr. This series contains three biological replicates that were analyzed as independent replicate experiments (data were normalized within each replicate experiment, not across all samples).
GSE492	-	GPL91	12	The purpose of this study is to discover genes that might increase aqueous humor outflow when human ciliary muscle or human trabecular meshwork cells are treated with the prostaglandin analogues latanoprost free acid or prostaglandin F2alpha. Five tissue donors were pooled on each chip.
GSE493	11937576	GPL80	10	Juvenile dermatomyositis (JDM), the most common pediatric inflammatory myopathy, is a systemic vasculopathy affecting young children. Epidemiology studies documenting an antecedent illness in the 3 mo before the first definite symptom (rash and/or weakness) of JDM are supported by immunologic data that suggest that the disease pathophysiology is Ag driven. The purpose of this study was to compare…
GSE495	-	GPL83	16	Nrf2 is a transcription factor that binds to antioxidant response elements of the regulatory region of a number of antioxidant genes. A mutation in the Nrf2 gene increases susceptibility to hyperoxic lung injury. This project examines expression differences between wild type and Nrf2 knock out mice with the hope of providing insight to the downstream effector genes regulated by Nrf2.
GSE495	-	GPL81	14	Nrf2 is a transcription factor that binds to antioxidant response elements of the regulatory region of a number of antioxidant genes. A mutation in the Nrf2 gene increases susceptibility to hyperoxic lung injury. This project examines expression differences between wild type and Nrf2 knock out mice with the hope of providing insight to the downstream effector genes regulated by Nrf2.
GSE495	-	GPL82	16	Nrf2 is a transcription factor that binds to antioxidant response elements of the regulatory region of a number of antioxidant genes. A mutation in the Nrf2 gene increases susceptibility to hyperoxic lung injury. This project examines expression differences between wild type and Nrf2 knock out mice with the hope of providing insight to the downstream effector genes regulated by Nrf2.
GSE4953	16895987	GPL83	39	Prior to the onset of autoimmune destruction, type 1 diabetic patients and an animal model thereof, the nonobese diabetic (NOD) mouse, show morphological and functional abnormalities in target organs, which may act as inciting events for leukocyte infiltration. To better understand these abnormalities, but without the complications associated with inflammatory infiltrates, we examined genes expre…
GSE4953	16895987	GPL81	39	Prior to the onset of autoimmune destruction, type 1 diabetic patients and an animal model thereof, the nonobese diabetic (NOD) mouse, show morphological and functional abnormalities in target organs, which may act as inciting events for leukocyte infiltration. To better understand these abnormalities, but without the complications associated with inflammatory infiltrates, we examined genes expre…
GSE4953	16895987	GPL82	39	Prior to the onset of autoimmune destruction, type 1 diabetic patients and an animal model thereof, the nonobese diabetic (NOD) mouse, show morphological and functional abnormalities in target organs, which may act as inciting events for leukocyte infiltration. To better understand these abnormalities, but without the complications associated with inflammatory infiltrates, we examined genes expre…
GSE4959	16997903	GPL341	10	Activation of the pregnane X receptor (NR1I2) by drugs and other xenobiotics stimulates (or suppresses) expression of numerous genes involved in the metabolic elimination of foreign compounds and some toxic endogenous substrates.We used microarray analysis to identify genes whose expression in rat liver was significantly altered by pregnenolone 16alpha-carbonitrile (PCN) treatment.
GSE4984	16785517	GPL570	12	Human monocyte derived dendritic cells matured via galectin-1 or LPS.
GSE5011	-	GPL1261	10	Experimental autoimmune encephalomyelitis (EAE) is an autoimmune inflammatory disease of the CNS that is mediated by T cells and macrophages and represents the paradigmatic model for multiple sclerosis (MS). In EAE, therapeutic approaches targeting T cells have been successfully utilized leading to immunosuppression or tolerance. It has been recently shown that mesenchimal stem cells (MSC) isolat…
GSE5019	-	GPL1355	20	The nasal epithelium is an important target site for chemically-induced toxicity and carcinogenicity. Human epidemiological investigations and experimental laboratory animal studies show that the nasal olfactory epithelium is selectively damaged by inhalation exposure to several chemicals, including vinyl acetate and hydrogen sulfide. The reason for the relative sensitivity of the nasal olfactory…
GSE5035	-	GPL1261	12	In our original grant we proposed to use the NR3B-null mouse model to study the role of NR3B subunit in motor neuron function. We have now successfully generated NR3B null mice. Interestingly, NR3B-null mice invariably die at age P4-P8. Our preliminary examination indicates that the motor strength of these mice is severely impaired prior to death. As we continue to explore the cause of death in N…
GSE5037	-	GPL1261	18	In our original grant we proposed to use the NR3B-null mouse model to study the role of NR3B subunit in motor neuron function. We have now successfully generated NR3B null mice. Interestingly, NR3B-null mice invariably die at age P4-P8. Our preliminary examination indicates that the motor strength of these mice is severely impaired prior to death. As we continue to explore the cause of death in N…
GSE5040	16857735	GPL570	24	Lymphoblast cells from a patient with Freidriech's Ataxia were incubated with pyrrole-imidazole polyamides targeted to the GAA triplet repeat in the intron 1. The polyamides were shown in cell culture to increase levels of endogenous frataxin mRNA. A normal sibling derived lymphoblast cell line was used as a control.
GSE5054	17640998	GPL96	12	Normal primary thyroid cells were incubated with vehicle, 100 IU/ml IFN-gamma, 50 IU/ml IL1-beta, or a combination of both IFN-gamma and IL1-beta for 24 or 72 hours. The experiment was repeated 5 times using thyroid cells from 5 different patients. RNA expression was analyzed using Affymetrix HG_U133A arrays for 3 of the thyroids, and HG_U133A_2.0 (small version of HG_U133A) arrays for 2 of the t…
GSE5056	17108109	GPL80	44	Upregulation of Expression of the Ubiquitin Carboxyl Terminal Hydrolase L1 Gene in Human Airway Epithelium of Cigarette SmokersThe microarray data deposited here is from 44 HuGeneFL GeneChips, from 9 normal non-smokers and 13 phenotypic normal smokers, large airways, 2 samples per individual, one from the right lung and one from the left lung. These samples were previously described in Hackett NR…
GSE5057	17108109	GPL96	11	Upregulation of Expression of the Ubiquitin Carboxyl Terminal Hydrolase L1 Gene in Human Airway Epithelium of Cigarette SmokersThe microarray data deposited here is from 11 HG-U133A GeneChips, from 5 normal non-smokers and 6 phenotypic normal smokers, large airways. Samples from the small airways of these individuals have been obtained and analyzed using the HG-U133A GeneChip; the small airway sa…
GSE5058	17108109	GPL570	39	Upregulation of Expression of the Ubiquitin Carboxyl Terminal Hydrolase L1 Gene in Human Airway Epithelium of Cigarette SmokersThe microarray data deposited here is from 39 HG-U133 Plus 2.0 GeneChips, from 12 normal non-smokers, 12 phenotypic normal smokers, 9 Early COPD and 6 COPD individuals, all small airways, all small airway. A subset of these samples have been already submitted under GEO Ac…
GSE5060	17108109	GPL570	48	This SuperSeries is composed of the following subset Series:GSE5056: Airway epithelium, large airways, phenotypically normal smokers vs non-smokers, MAS5 (HuGeneFL)GSE5057: Airway epithelium, large airways, phenotypically normal smokers vs non-smokers, MAS5 (HG-U133A)GSE5058: Airway epithelium, small airways, normal non-smokers, phenotypic normal smokers, smokers with COPD and early COPDGSE5059: …
GSE5060	17108109	GPL96	22	This SuperSeries is composed of the following subset Series:GSE5056: Airway epithelium, large airways, phenotypically normal smokers vs non-smokers, MAS5 (HuGeneFL)GSE5057: Airway epithelium, large airways, phenotypically normal smokers vs non-smokers, MAS5 (HG-U133A)GSE5058: Airway epithelium, small airways, normal non-smokers, phenotypic normal smokers, smokers with COPD and early COPDGSE5059: …
GSE5060	17108109	GPL80	54	This SuperSeries is composed of the following subset Series:GSE5056: Airway epithelium, large airways, phenotypically normal smokers vs non-smokers, MAS5 (HuGeneFL)GSE5057: Airway epithelium, large airways, phenotypically normal smokers vs non-smokers, MAS5 (HG-U133A)GSE5058: Airway epithelium, small airways, normal non-smokers, phenotypic normal smokers, smokers with COPD and early COPDGSE5059: …
GSE5078	15169854	GPL81	23	We carried out a global survey of age-related changes in mRNA levels in the C57BL/6NIA mouse hippocampus and found a difference in the hippocampal gene expression profile between 2-month-old young mice and 15-month-old middle-aged mice correlated with an age-related cognitive deficit in hippocampal-based explicit memory formation. Middle-aged mice displayed a mild but specific deficit in spatial …
GSE5085	-	GPL1355	12	Gene expression and phenotypic consequences of laboratory housing in rats.Disease related-phenotypes and associated gene expressions of sedentary animals (living solely in a standard cage) were compared with animals that had access to twice-weekly one-hour physical activity in a large box (PA) and with those that had access to voluntary running wheel exercise (EX).
GSE5086	16789832	GPL570	81	We analyzed expression of 81 normal muscle samples from humans of varying ages, and have identified a molecular profile for aging consisting of 250 age-regulated genes. This molecular profile correlates not only with chronological age but also with a measure of physiological age. We compared the transcriptional profile of muscle aging to previous transcriptional profiles of aging in kidney and br…
GSE509	12456799	GPL85	10	Spermatogenesis requires the presence of functional somatic Sertoli cells in the seminiferous tubules of the testis. Sertoli cells provide support and factors necessary for the successful progression of germ cells into spermatozoa. Sertoli cells are regulated to a large degree by the glycoprotein hormone FSH, which is required for the testis to acquire full size and spermatogenic capacity. Signal…
GSE5090	17062763	GPL96	17	This experiment was designed to study if there are differences in gene expression in the adipose tissue of women affected by polycystic ovary syndrome (PCOS) compared to non-hyperandrogenic women. PCOS is the most common endocrinopathy in women of reproductive age, and is characterized by hyperandrogenism and chronic anovulation. This disease is frequently associated with obesity, insulin resista…
GSE5099	17082649	GPL97	15	Monocytes mature tom acrophages in the presence of the lineage determining cytokine M-CSF. They can be further polarized into M1 or M2 macrophages with distinct functional properties.We used microarrays to detail the global programme of gene expression underlying macrophage maturation and polarization and identified distinct classes of up-regulated genes during this process.
GSE5099	17082649	GPL96	15	Monocytes mature tom acrophages in the presence of the lineage determining cytokine M-CSF. They can be further polarized into M1 or M2 macrophages with distinct functional properties.We used microarrays to detail the global programme of gene expression underlying macrophage maturation and polarization and identified distinct classes of up-regulated genes during this process.
GSE5101	17473217	GPL341	44	Synthetic glucocorticoids are used therapeutically for a variety of conditions. Both the efficacy and toxicity of corticosteroids arise from their pharmacologically exaggerated effects on target and non-target tissues. For example, beneficial effects deriving from inhibition of the immune system are accompanied by toxic side effects that include hyperglycemia, dyslipidaemia, muscle wasting, fatty…
GSE5102	-	GPL570	15	Estrogen is a risk factor for breast cancer, yet its mechanism in the initiation of this disease is not clear. Here we use a model of estrogen-mediated malignant transformation of MCF-10F cells to identify the temporal acquisition of changes in genome structure and gene expression that correspond to the progressive transformed phenotype culminating in tumorigenesis. Genomic DNA and total RNA were…
GSE5106	17440010	GPL571	19	Context: Although androgen treatment increases muscle mass in HIV-infected men, the underlying mechanisms are poorly understood. Analysis of genome-wide microarray data obtained from skeletal muscle biopsies can be used to profile androgen-regulated pathways.Objective: To identify genes and pathways associated with testosterone treatment and myogenesis in the context of HIV-infected men using gen…
GSE5107	16966431	GPL96	83	Gene expression data of primary and secondary glioblastoma subgroups.
GSE511	11839152	GPL80	30	Exploiting the power of high-density gene arrays, the simultaneous expression analysis of 5600 cellular genes was executed on proliferating peripheral blood mononuclear cells (PBMCs) from three normal human donors that were infected in vitro with the T cell tropic laboratory strain of HIV-1, RF. Profiles of expressed genes were assessed at 1, 12, 24, 48, and 72 hr postinfection and compared with …
GSE5110	16763108	GPL570	10	Our results suggest that 48h of immobilization increases expression of mRNA for components of the UPP and MT function while decreasing mRNA and protein for components involved in ECM integrity. We hypothesized that 48h of immobilization would increase gene expression and respective protein products for components of the ubiquitin proteasome pathway (UPP).
GSE5115	16887886	GPL85	18	A time-course analysis of TSH-stimulation in two rat thyroid cell lines (FRTL5 and FRT/TSHR) was performed. The expression levels of 8,784 transcripts were measured at three different time points, i.e. before (0), 30 minutes (30m) and 17 hours (17h) after TSH stimulation, by means of Affymetrix RG-U34A arrays.
GSE5116	-	GPL570	12	The estrogen-dependence of breast cancer has long been recognized, however, the role of 17Î²-estradiol (E2) in cancer initiation was not known until we demonstrated that it induces complete neoplastic transformation of the human breast epithelial cells MCF-10F. E2-treatment of MCF-10F cells progressively induced high colony efficiency and loss of ductulogenesis in early transformed (trMCF) cells …
GSE512	12803996	GPL80	36	Using the Affymetrix HuGeneFL GeneChip, the global expression patterns of genes in the peripheral blood mononuclear cells (PBMCs) of rhesus macaques, infected with SIVmac251 and exhibiting rapid, typical, or slow rates of disease progression, were examined. Assessments of the change in gene expression (fold change), the temporal coordination of gene expression (self-organizing map analysis), and …
GSE5122	-	GPL96	58	Gene signatures were derived to separate responders from nonresponders by tipifarnib treatment.
GSE5127	17114358	GPL1261	18	Two-year rodent bioassays play a central role in evaluating both the carcinogenic potential of a chemical and generating quantitative information on the dose-response behavior for chemical risk assessments. The bioassays involved are expensive and time-consuming, requiring nearly lifetime exposures (two years) in mice and rats and costing $2 to $4 million per chemical. Since there are approximate…
GSE5128	17114358	GPL1261	18	Two-year rodent bioassays play a central role in evaluating both the carcinogenic potential of a chemical and generating quantitative information on the dose-response behavior for chemical risk assessments. The bioassays involved are expensive and time-consuming, requiring nearly lifetime exposures (two years) in mice and rats and costing $2 to $4 million per chemical. Since there are approximate…
GSE5130	16624518	GPL339	103	We have developed a total RNA amplification and labeling strategy for use with Affymetrix GeneChips. Our protocol, which we denote BIIB, employs two rounds of linear T7 amplification followed by Klenow labeling to generate a biotinylated cDNA. In benchmarking studies using a titration of mouse universal total RNA, BIIB outperformed commercially available kits in terms of sensitivity, accuracy, an…
GSE5140	17416441	GPL1261	13	Here we show that oral creatine (Cr) supplementation leads to increased life span in mice. Treated mice showed improved neurobehavioral performance, decreased accumulation of the aging pigment lipofuscin and upregulation of âanti-agingâ genes in brain. As Cr is virtually free of adverse effects, it may be a promising food supplement for healthy aging in man.
GSE5141	16936074	GPL81	44	In Xenopus, establishment of the anterior-posterior axis involves two key signalling pathways, canonical Wnt and Nodal-related TGF-Î². There are also a number of transcription factors that feedback upon these pathways. The homeodomain protein Hex, an early marker of anterior positional information, acts as a transcriptional repressor suppressing induction and propagation of the Spemman organiser …
GSE5142	16951325	GPL96	11	Using CD8+ T lymphocyte clones over-expressing telomerase weinvestigated the molecular mechanisms that regulate T cell proliferation. Transduction and subcloning procedures were performed on CD8 + naive T-cell clones isolated from two different healthy individuals aged between 30 to 35 years (HD1 and HD2). T-cell cloneswere transduced to express hTERT/GFP or GFP alone. HD2 was profiled on U133Plu…
GSE5144	16951325	GPL96	11	Expression in GFP vs. GFP/hTERT transduced CD8 T Lymphocytes from Healty Donors (HD) 1 and 2 at early and late passages. Using CD8+ T lymphocyte clones over-expressing telomerase weinvestigated the molecular mechanisms that regulate T cell proliferation. Transduction and subcloning procedures were performed on CD8 + naive T-cell clones isolated from two different healthy individuals aged between …
GSE5180	17502243	GPL96	25	Patients with bicuspid aortic valve (BAV) have increased risk of thoracic ascending aortic aneurysm (AscAA) and dissection compared to those with a normal tricuspid aortic valve (TAV). The present study was undertaken to evaluate whether differences in gene expression exist in aortas from BAV and TAV patients with AscAA.
GSE5198	17055441	GPL1261	18	We compared gene expression in the small intestine (ileum) of mice that were either (i) germ-free, (ii) colonized with a conventional mouse cecal microbiota, (iii) colonized with a conventional zebrafish gut microbiota, or (iv) colonized with Pseudomonas aeruginosa PAO1.
GSE5200	16882715	GPL96	24	MCF7 cells were exposed to xenoestrogens (vehicle = 0.1% ethanol, 30 pM 17beta-estradiol, 3 micromolar genistein, 10 micromolar genistein, 1 micomolar daidzein, 10 nM bisphenol A, 10 nM para-nonylphenol, 3 nM PPT) for 48 hours.
GSE5202	16926395	GPL1261	12	Facultative intracellular Brucella infect and survive inside macrophages, and the outcome of macrophage-Brucella interaction is a basis for establishment of a chronic Brucella infection. The majority of Brucella are killed at the early infection stage. A subpopulation of virulent Brucella strains is instead trafficked to an intracellular replicative phagosome, and are resistant to further attack …
GSE5206	-	GPL570	105	Goal of the experiment: To identify and understand the overall transcriptional programming of human colorectal cancer tumors by evaluating gene expression profiles of tumors from four murine models, and comparing and contrasting these to the developing stages of the mouse embryonic colon.Experiment description: Colorectal cancer results from multiple genetic and epigenetic events that produce var…
GSE5220	17005663	GPL96	16	Longitudinal analysis of monocyte gene expressions patterns before and after cessation of HAART: understanding the impact of HIV viremia on the monocyte tranascritome. We used microarrays to detail the global program of gene expression underlying defects in monocytes from HIV infected patients during viremia..Diminished Production of Monocyte Proinflammatory Cytokines During HIV Viremia is Mediat…
GSE5222	17210724	GPL96	12	Genomic losses on chromosome 16q are among the most frequent alterations found in retinoblastoma. In this study, Affymetrix GeneChip analyses along with LOH analysis of microsatellie markers was used to identify candidate tumor suppressor loci in a set of retinoblastoma.We used microarrays to identify genes differentially expressed in retinoblastoma with LOH on 16q (M19484, M22590, M22641, M22860…
GSE5230	16854234	GPL570	16	Expression profiling the response to inhibition of DNA methylation and histone deacetylation.Comparison of expression in HepG2 cells treated with 5-aza-dC, Trichostatin A, both, or none (control) to change methylation and acetylation status.Background:DNA methylation and histone deacetylation are epigenetic mechanisms that play major roles in eukaryotic gene regulation. We hypothesize that many g…
GSE5243	-	GPL339	24	The renal adaptation to changing dietary phosphate levels is not well understood. The dominant Hyp mutation of the Phex gene in mice causes X-linked hypophosphatemia with low renal retention of phosphate and blocks physiologic adaptation to low phosphate diets. At P < 0.01, there were 1,711 transcripts significantly affected by genotype, 1,428 by diet and 5,601 by sex. Many renal transporters oth…
GSE5243	-	GPL340	24	The renal adaptation to changing dietary phosphate levels is not well understood. The dominant Hyp mutation of the Phex gene in mice causes X-linked hypophosphatemia with low renal retention of phosphate and blocks physiologic adaptation to low phosphate diets. At P < 0.01, there were 1,711 transcripts significantly affected by genotype, 1,428 by diet and 5,601 by sex. Many renal transporters oth…
GSE5258	17008526	GPL3921	218	A reference collection of genome-wide transcriptional expression data for bioactive small molecules.
GSE5261	-	GPL570	105	This SuperSeries is composed of the following subset Series:GSE5203: Mouse colon development seriesGSE5204: Mouse models of human colon cancer and mouse colon developmentGSE5206: Large-scale deployment of embryonic gene programming in human and murine colon cancer: a new target for intervention.
GSE5264	17413031	GPL570	30	Microarray analysis was performed to identify transcriptional changes that occur during mucociliary differentiation of human primary bronchial epithelial cells cultured at an air-liquid interface (ALI).
GSE5273	-	GPL1355	22	Gene expression analysis after the treatments for functional recovery after contusion injury which are mediated by glutathione
GSE528	-	GPL75	13	Lack of the conserved NK2-domain of the cardiac transcription factor Nkx2.5 causes multiple heart defects .The NK2 family of homeobox genes constitutes a family of transcription factors that play an important role in different developmental processes. Members of this group are characterized by two highly conserved protein domains: the homeodomain, conferring DNA binding activity, and the NK2-spec…
GSE528	-	GPL76	13	Lack of the conserved NK2-domain of the cardiac transcription factor Nkx2.5 causes multiple heart defects .The NK2 family of homeobox genes constitutes a family of transcription factors that play an important role in different developmental processes. Members of this group are characterized by two highly conserved protein domains: the homeodomain, conferring DNA binding activity, and the NK2-spec…
GSE5281	17077275	GPL570	161	Information about the genes that are preferentially expressed during the course of Alzheimerâs disease (AD) could improve our understanding of the molecular mechanisms involved in the pathogenesis of this common cause of cognitive impairment in older persons, provide new opportunities in the diagnosis, early detection, and tracking of this disorder, and provide novel targets for the discovery o…
GSE5282	16837601	GPL1355	12	Primary cultures of astrocytes from rat optic nerve heads were treated with EGFR ligand, EGF. Two cell lines from two different rat donors were used. The sister cell cultures were set as control and EGF treated groups.
GSE5285	17481853	GPL85	68	Dahl-Iwai (DI) salt-sensitive rats were studied using microarrays to identify gender-specific differences in the kidney, both basal differences and responses to a high salt diet. In DI rat kidneys, gene expression profiles demonstrated inflammatory and fibrotic responses selectively in females. Gonadectomy of DI rats abrogated gender differences in gene expression. Gonadectomized female and gonad…
GSE5287	-	GPL96	30	BACKGROUNDCisplatin-containing chemotherapy is the standard of care for patients with locally advanced and metastatic transitional cell carcinoma of the urothelium. The response rate is around 50% and tumor derived molecular prognostic markers are needed for estimation of response and survival. METHODSAffymetrix GeneChip expression profiling was carried out using tumor material from 30 patients. …
GSE5296	-	GPL1261	96	Traumatic spinal cord injury (SCI) initiates a complex series of pathophysiological secondary responses that lead to tissue loss and functional deficits.This study represents a comprehensive database of temporal changes in gene expression that underlie the secondary injury response that occurs in a well-defined mouse model of contusion injury.
GSE5297	17110513	GPL1261	20	Myosine heavy chain I was overexpressed in mouse skeletal muscle. The transgenic mice, as well as the wild type mice, were endurance trained on treadmill for 5 days/week over 8 weeks at 80% peak aerobic capacity in comparison with untrained mice. The gene expression profiles of the skeletal muscles from wild-type trained (WTT) and untrained (WTUT), and transgenic trained (TGT) and untrained (TGUT…
GSE5304	-	GPL339	23	Study muscle regeneration in Emerin and Lamin AC KO mice. Gastrocnemius muscles were injected with cardiotoxin. Muscles were isolated at different time points.
GSE5305	-	GPL339	12	This project investigates the function of p68/p72 in muscle gene expression and skeletal C2C12 cell differentiation. p68/p72 in C2C12 cells cultured in either growth medium (GM) or differentiation medium (DM) was knocked down using shRNA p68/p72 retrovirus, and globle gene expression was profiled using Affymetrix MOE 430A and 430B GeneChip.
GSE5305	-	GPL340	12	This project investigates the function of p68/p72 in muscle gene expression and skeletal C2C12 cell differentiation. p68/p72 in C2C12 cells cultured in either growth medium (GM) or differentiation medium (DM) was knocked down using shRNA p68/p72 retrovirus, and globle gene expression was profiled using Affymetrix MOE 430A and 430B GeneChip.
GSE5306	-	GPL81	12	This project investigates immune response differences in male and female during puberty.
GSE5320	16985005	GPL81	11	Studies using mice with beta4 nicotinic acetylcholine receptor (nAChR) subunit deficiency (beta4-/- mice) helped reveal the roles of this subunit in bradycardiac response to vagal stimulation, nicotine-induced seizure activity and anxiety. In order to identify genes that might be related to beta4-containing nAChRs activity, we compared the mRNA expression profiles of brains from beta4-/- and wild…
GSE5324	17030620	GPL1261	48	Tristetraprolin (TTP) is a tandem CCCH zinc finger protein that was identified through its rapid induction by mitogens in fibroblasts. Studies of TTP-deficient mice, and cells derived from them, showed that TTP could bind to certain AU-rich elements in mRNAs, leading to increases in the rates of mRNA deadenylation and destruction. Known physiological targetmRNAs for TTP include tumor necrosis fac…
GSE5327	17420468	GPL96	58	Validation of lung metastasis signature (LMS) and its association with risk of developing lung metastasis and with primary tumor size.
GSE5333	-	GPL1261	16	The overall objective of this proposal is to map the temporal and spatial dynamics of gene expression in the fetal mouse testis at key developmental timepoints. Urogenital tract malformations are the most common birth defects in males and their incidence together with other male reproductive health concerns such as reduced fertility and testicular cancer are reportedly on the rise in the human po…
GSE5334	-	GPL1261	19	The overall objective of this proposal is to map the temporal and spatial dynamics of gene expression in the fetal mouse testis at key developmental timepoints. Urogenital tract malformations are the most common birth defects in males and their incidence together with other male reproductive health concerns such as reduced fertility and testicular cancer are reportedly on the rise in the human po…
GSE5339	17459161	GPL571	45	Exposure to vanadium pentoxide (V2O5) is a cause of occupational bronchitis. We evaluated gene expression profiles in cultured human lung fibroblasts exposed to V2O5 in vitro in order to identify candidate genes that could play a role in airway remodeling associated with V2O5-induced bronchitis. Gene expression was measured at various time points over a 24 hr period using the Affymetrix Human Gen…
GSE5350	16964229	GPL1355	72	Microarray technology has had a profound impact on gene expression research. Some studies have questioned whether similar expression results are obtained when the same RNA samples are analyzed on different platforms. The MicroArray Quality Control (MAQC) project was initiated to address these concerns, as well as other performance and analysis issues. We demonstrate the consistency of results wit…
GSE5350	16964229	GPL570	140	Microarray technology has had a profound impact on gene expression research. Some studies have questioned whether similar expression results are obtained when the same RNA samples are analyzed on different platforms. The MicroArray Quality Control (MAQC) project was initiated to address these concerns, as well as other performance and analysis issues. We demonstrate the consistency of results wit…
GSE5372	17164391	GPL570	22	Responses of the Human Airway Epithelium Transcriptome to In Vivo InjuryTo identify genes participating in repair of the human airway epithelium following injury, we used bronchoscopy and brushing to denude the airway epithelium of healthy individuals, sequentially sampled the same region 7 and 14 days later, and assessed the recovered epithelium for relative levels of gene expression using Affym…
GSE5377	17646850	GPL201	20	In this study we performed transcriptional profiling of transurethral resections of hormone resistant prostate cancer and compared it with benign prostatic hyperplasia (BPH), untreated localized prostate cancer and hormone sensitive prostate cancer.
GSE5388	16894394	GPL96	61	Bipolar affective disorder is a severe psychiatric disorder with a strong genetic component but unknown pathophysiology. We used microarray technology (Affymetrix HG-U133A GeneChips) to determine the expression of approximately 22 000 mRNA transcripts in post-mortem brain tissue (dorsolateral prefrontal cortex) from patients with bipolar disorder and matched healthy controls. A cohort of 70 subje…
GSE5389	16894394	GPL96	21	Bipolar affective disorder is a severe psychiatric disorder with a strong genetic component but unknown pathophysiology. We used microarray technology (Affymetrix HG-U133A GeneChips) to determine the expression of approximately 22 000 mRNA transcripts in post-mortem brain tissue (orbitofrontal cortex) from patients with bipolar disorder and matched healthy controls. Orbitofrontal cortex tissue fr…
GSE5390	-	GPL96	15	Down syndrome (DS) is the result of trisomy chromosome 21 but the mechanisms by which the genotype leads to the characteristic disease phenotype are unclear. We performed a microarray study using human adult brain tissue (dorsolateral prefrontal cortex) from DS subjects and healthy controls to characterise for the first time the human adult Down syndrome brain
GSE5392	16894394	GPL96	82	This SuperSeries is composed of the following subset Series:GSE5388: Adult postmortem brain tissue (dorsolateral prefrontal cortex) in subjects with bipolar disorderGSE5389: Adult postmortem brain tissue (ortibtofrontal cortex) in subjects with bipolar disorderBipolar affective disorder is a severe psychiatric disorder with a strong genetic component but unknown pathophysiology. We used microarra…
GSE5398	-	GPL339	11	Many vaccination studies have revealed various degrees of protection in mouse models. However, the mechanism of protection is not fully understood. The aim of this study was to identify genes specifically expressed in H. pylori infection and prophylactic immunized mice. A prophylactic immunization with purified protein of H. pylori BabA combining with the mucosal CTA1-DD adjuvant was performed in…
GSE5406	16952980	GPL96	210	Left ventricular myocardium was snap-frozen at time of cardiac transplantation from patients with advanced idiopathic or ischemic cardiomyopathy, or at time of harvest from unused donor heart that serve as a nonfailing control. No subjects received mechanical support devices.
GSE5413	17478534	GPL81	25	Common acute injuries to skeletal muscle can lead to significant pain and disability. The current therapeutic approaches for treating muscle injuries are dependent on the clinical severity but not on the type of injury. The aim of this study was to compare the molecular events accompanying the degeneration and repair phases of contraction- and trauma-induced muscle injuries by applying DNA microa…
GSE5418	16988231	GPL96	71	Using genome-wide expression profiles from persons either experimentally challenged with malaria-infected mosquitoes or naturally-infected with Plasmodium falciparum malaria, we present details of the transcriptional changes that occur with infection and that are either commonly shared between subjects with pre-symptomatic and clinically apparent malaria or that distinguish these two groups. Our …
GSE5429	15128411	GPL81	32	Mouse inbred strains differ in many aspects of their phenotypes, and it is known that gene expression does so too. This gives us an opportunity to isolate the genetic aspect of variation in expression and compare it to other phenotypic variables. We have investigated these issues using an eight-strain expression profile comparison with four replicates per strain on Affymetrix MGU74av2 GeneChips f…
GSE5446	17612509	GPL88	16	The aim of this study was to characterize the basal expression of OC, MOD and SV of newborn rats (3-5 day old) and its changes by shortâterm cultivation (24 hrs) and mild hypoxia (5 hrs). Three varieties of tissue samples were analyzed (i) Freshly prepared tissue, used as control; (ii) cultures held under normoxic conditions and (iii) cultures exposed during cultivation to 5 h hypoxia. The gene…
GSE5460	-	GPL570	129	Predictors built from gene expression data accurately predict ER, PR, and HER2 status, and divide tumor grade into high-grade and low-grade clusters; intermediate-grade tumors are not a unique group. In contrast, gene expression data cannot be used to predict tumor size or lymphatic-vascular invasion.
GSE5475	17426115	GPL339	12	The peroxisome proliferator-activated receptor alpha (PPARÎ±) is a fatty acid-activated transcription factor that governs a variety of biological processes. Little is known about the role of PPARÎ± in the small intestine. Since this organ is frequently exposed to high levels of PPARÎ± ligands via the diet, we set out to characterize the function of PPARÎ± in small intestine using functional genom…
GSE5478	17693601	GPL1355	42	During kidney development segmented epithelia of the nephron derive from progenitor cells in the metanephric mesenchyme after induction by secreted molecules from the ureteric bud. We have identified three distinct inductive activities from a ureteric bud cell line. These include leukemia inhibitory factor (LIF), neutrophil gelatinase-associated lipocalin (NGAL) and an active fraction currently r…
GSE5500	16983087	GPL1261	21	An important event in the pathogenesis of heart failure is the development of pathological cardiac hypertrophy. In cultured cardiac cardiomyocytes, the transcription factor Gata4 is required for agonist-induced cardiomyocyte hypertrophy. We hypothesized that in the intact organism Gata4 is an important regulator of postnatal heart function and of the hypertrophic response of the heart to patholog…
GSE5504	15668391	GPL570	10	To evaluate gene expression in human peripheral blood derived monocytes over the course of an LPS stimulation time-series.
GSE5509	-	GPL1355	39	Rat has been treated with different compounds with the purpose of investigating toxicological mechanisms. But toxic and non-toxic compounds has been administered. 3 toxic (ANIT, DMN, NMF) 3 non-tox (Caerulein, dinitrophenol(DNP), Rosiglitazone) in 5-plicates (30 arrays in all) and 9 untreated (control), 39 samples in all.The array data was used to identify genes with biomarker potential for detec…
GSE5542	16800785	GPL96	32	Type I and type II interferons (IFNs) bind to different cell surface receptors but activate overlapping signal transduction pathways. We examined the effects of a type I IFN (IFN-acon1) and a type II iFN (IFN-g1b) on gene experession in A549 cells and demonstrate that there is a common set of genes modulated by both IFNs as well as a set of gene specifically regulated by each, reflecting the acti…
GSE5547	-	GPL570	24	Comparison of gene expression from subjects who resolved or formed pustules to H.ducreyi.In human inoculation experiments, the cutaneous immune response to Haemophilus ducreyi consists of serum, PMN, macrophages, T cells and myeloid DC. In reinfection experiments, some subjects form pustules twice (PP group) or resolve infection twice (RR group). Although pustule formation is associated with seru…
GSE5550	17252012	GPL201	17	Chronic myelogenous leukaemia (CML) is a malignant disorder of the hematopoietic stem cell, which is characterized by the reciprocal translocation between chromosomes 9 and 22 (t(9;22)(q34;q11)) The translocation results in the formation of the BCR-ABL fusion oncogene encoding a protein with constitutive activated tyrosine kinase activity which plays a central role in the pathogenesis of the dise…
GSE5556	-	GPL570	12	Human aortic endothelial cells were grown in culture until confluent. In three experiments using cells derived from three separate donors confluent cultures were incubated for 6 h with contol medium, or medium containing either extracts of oligomeric procyanidins from cranberry juice or red wine, or a procyanidin-rich grape seed extract. At the end of the 6 h treatment period conditioned media sa…
GSE5563	17471573	GPL570	19	In order to understand the molecular mechanism behind Vulvar Intraepithelial Neoplasia (VIN), we have analyzed the gene expression profile of VIN lesions in comparison to controls.
GSE5580	17032758	GPL96	42	Monitoring genome-wide, cell-specific responses to human disease, although challenging, holds great promise for medicineâs future. Patients with injury severe enough to develop multiple organ dysfunction syndrome (MODS) are known to have multiple immune derangements, including T-cell apoptosis and anergy combined with depressed monocyte antigen presentation. Genome-wide expression analysis of h…
GSE5589	17114459	GPL81	34	IL-10 or IL-6 stimulation of control 129xC57BL/6 murine bone marrow derived macrophages in the presence of LPS.We used microarrays to detail the global programme of gene expression changes in response to IL-6 or IL-10 stimulation in the presence of lipopolysaccharide. BMDMs were isolated from control, IL-6-/-, and IL-10-/- mice on a 129XBL/6 mixed background mice and differentiated in the presenc…
GSE5606	17062650	GPL1355	14	Analysis of gene expression changes in the LV of a rodent heart that occur with uncontrolled diabetesWe used microarrays to detail the global changes that occur in gene expression in the LV of the heart as a result of STZ-induced diabetes.
GSE564	17538967	GPL81	27	Mouse liver RNA was extracted using Trizol (Invitrogen) and Qiagen RNeasy kits. RNA was checked with an Agilent Bioanalyzer for evidence of sub-genomic DNA and degradation. Targets were produced using standard Affymetrix protocols. Each sample represents data from a single mouse liver.
GSE5647	-	GPL341	12	These samples comprise the full analysis of liver function during response to thermal injury.
GSE5657	-	GPL1261	20	The pathophysiology of the osteomalacia in X-linked hypophosphatemia is uncertain. In this project, genomic DNA microarrays were used to identify novel genes with abnormal mRNA expression levels in mice with the dominant Hyp mutation of the Phex gene. Femoral shafts from five-week-old C57BL/6J mice, male and female, normal and Hyp (hemizygous male and heterozygous female), were flushed with salin…
GSE5663	17084318	GPL81	49	Accuracy of sepsis prediction was obtained using cross-validation of gene expression data from 12 human spleen samples and from 16 mouse spleen samples. For blood studies, classifiers were constructed using data from a training data set of 26 microarrays. The error rate of the classifiers was estimated on seven de-identified microarrays, and then on a subsequent cross-validation for all 33 blood …
GSE5663	17084318	GPL80	12	Accuracy of sepsis prediction was obtained using cross-validation of gene expression data from 12 human spleen samples and from 16 mouse spleen samples. For blood studies, classifiers were constructed using data from a training data set of 26 microarrays. The error rate of the classifiers was estimated on seven de-identified microarrays, and then on a subsequent cross-validation for all 33 blood …
GSE5666	17376971	GPL341	78	Although immediate early genes (IEGs) such as Bdnf, Arc and Egr1, have been implicated in plasticity, the larger pathways related to memory and memory disorders are not well understood. Here, we combined statistical Affymetrix microarray and behavioral analyses to identify key genes and pathways associated with aging-related cognitive impairment. Aged rats were separated into cognitively unimpair…
GSE5667	17181634	GPL97	17	Atopic dermatitis (AD) is a common pruritic dermatitis with macroscopically nonlesional skin that is often abnormal. Therefore, we used high-density oligonucleotide arrays to identify cutaneous gene transcription changes associated with early AD inflammation as potential disease control targets. Skin biopsy specimens analyzed included normal skin from five healthy nonatopic adults and both minima…
GSE5667	17181634	GPL96	17	Atopic dermatitis (AD) is a common pruritic dermatitis with macroscopically nonlesional skin that is often abnormal. Therefore, we used high-density oligonucleotide arrays to identify cutaneous gene transcription changes associated with early AD inflammation as potential disease control targets. Skin biopsy specimens analyzed included normal skin from five healthy nonatopic adults and both minima…
GSE5671	-	GPL1261	18	Mouse embryonic stem cells can differentiate in vitro into spontaneously contracting cardiomyocytes. The main objective of this study was to investigate cardiogenesis in cultures of differentiating embryonic stem cells (ESCs) and to determine how closely it mimics in vivo cardiac development. We identified and isolated a population of cardiac progenitor cells (CPCs) through the use of a reporter …
GSE5675	17283119	GPL570	41	Pilocytic astrocytomas (PAs) are the most common glioma in children. While many PAsare slow growing or clinically indolent, others exhibit more aggressive features with tumorrecurrence and death. In order to identify genetic signatures that might predict PA clinicalbehavior, we performed gene expression profiling on 41 primary PAs arising sporadically and inpatients with neurofibromatosis type 1 …
GSE5679	16982809	GPL570	11	Our data indicated that activation of the PPARg nuclear receptor induces a retinoid response in human dendritic cells. In order to assess the contribution of retinoid signaling to the PPARg response we decided to use a combination of pharmacological activators and inhibitors of these pathways. Cells were treated with the synthetic PPARg ligand rosiglitazone (RSG), or with RSG along with the RARa …
GSE5680	16983098	GPL1355	120	We used expression quantitative trait locus mapping in the laboratory rat (Rattus norvegicus) to gain a broad perspective of gene regulation in the mammalian eye and to identify genetic variation relevant to human eye disease. Of >31,000 gene probes represented on an Affymetrix expression microarray, 18,976 exhibited sufficient signal for reliable analysis and at least 2-fold variation in express…
GSE5681	-	GPL571	14	Abstract:Aplidin (plitidepsin) is a novel antitumor agent isolated from the Mediterranean tunicate Aplidium albicans. Aplidin has shown impressive in vitro and in vivo activity against various cancer cell lines. Based on the results from several laboratories Aplidin has recently been granted orphan drug designation for the treatment of acute lymphoblastic leukemia (ALL) and Multiple Myeloma (MM) …
GSE5682	-	GPL570	20	Gain-of-function mutations in NOTCH1 are common in T-cell lymphoblastic leukemias making this receptor a promising target for drugs such as gamma-secretase inhibitors, which block a proteolytic cleavage required for NOTCH1 activation. However, the enthusiasm for these therapies has been tempered by tumor resistance and the paucity of information on the oncogenic programs regulated by oncogenic NO…
GSE571	15780141	GPL91	16	Expression profiles of HeLa CD4+ cells transfected with epitope-tagged eTat plasmid. Cells are treated with nocodazole and hydroxyurea.
GSE5715	17615178	GPL1261	10	Cystic fibrosis transmembrane conductance regulator (Cftr) knockout mice present the clinical features of low body weight and intestinal disease permitting an assessment of the interrelatedness of these phenotypes in a controlled environment. To identify intestinal alterations which affect body weight in CF mice the histological phenotypes of crypt-villus axis height, goblet cell hyperplasia, and…
GSE572	15780141	GPL91	16	Expression profiles of HeLa CD4+ cells transfected with parental vector pCep4. Cells are treated with nocodazole and hydroxyurea.
GSE5720	17339364	GPL97	60	Comparison between cell lines from 9 different cancer tissue of origin types (Breast, Central Nervous System, Colon, Leukemia, Melanoma, Non-Small Cell Lung, Ovarian, Prostate, Renal) from NCI-60 panel
GSE5720	17339364	GPL96	60	Comparison between cell lines from 9 different cancer tissue of origin types (Breast, Central Nervous System, Colon, Leukemia, Melanoma, Non-Small Cell Lung, Ovarian, Prostate, Renal) from NCI-60 panel
GSE5764	17389037	GPL570	30	The aim of our study was to identify gene expression profiles of ductal and lobular carcinomas in relation to normal ductal and lobular cells. We examined ten mastectomy specimens from postmenopausal breast cancer patients. Ductal and lobular tumor and normal cells were microdissected from cryosections. Fifty nanograms of total RNA were amplified and labeled by PCR and in vitro transcription. GCO…
GSE5787	17020965	GPL570	33	Purpose: To explore intratumor heterogeneity in gene expression profiles from patients with cervical cancer.Experimental Design: A total of 33 biopsies were obtained from 11 patients, sampling between two and five different areas for each tumor.The extracted RNAwas hybridized onto the Affymetrix U133 Plus 2.0 oligonucleotide chip. The variance of expression within a patient (W), between patients …
GSE5788	17713554	GPL96	14	T-cell prolymphocytic leukemina (T-PLL) is an agressive lymphoma derived from mature T-cells, which is in most cases characterized by the presence of an inv(14)(q11q32) and a characteristic pattern of secondary chromosomal abberations.We used microarrays to compare the transcriptomes of eight immunomagnetically purified CD3+ normal donor derived peripheral blood cells with five highly purified in…
GSE5789	16984957	GPL85	21	This study investigates the effects of the aryl hydrocarbon receptor (AhR) ligands TCDD, PCB126 and PeCDF; the non-AhR ligand PCB153 and the binary mixture PCB126/PCB153 on hepatic gene expression in female sprague dawley rats. Rats were treated with toxicological equivalent doses of TCDD (100ng/kg), PeCDF (200ng/kg), PCB126 (1000ng/kg) and PCB153 (1000ug/kg) 5 days a week for 13 weeks.
GSE5790	-	GPL570	24	Lassa fever virus is a zoonotic pathogen that plagues the endemic areas of West Africa. Rhesus macaques infected with a related arenavirus, LCMV-WE, serve as a model for Lassa-infection of human beings. Using a dose similar to that expected from a needle-stick, monkeys experience an early pre-viremic phase (day 1-3), a viremic phase with febrile onset (day 4-7), and, like human beings who succumb…
GSE5795	-	GPL339	11	The effect of photoperiod on gene expression was assessed in punch samples of the bed nucleus of the stria terminalis and medial preoptic area. Long day mice were housed in 16L:8D and short day mice were housed in 8L:16D.
GSE5808	17538120	GPL96	18	Children with acute measles were admitted to the University Teaching Hospital in Lusaka, Zambia. Peripheral blood was collected at hospital entry, discharge and 1-month follow-up. Control samples were also collected from uninfected children. All children were HIV negative.
GSE5809	17021345	GPL570	14	During the invasive phase of implantation, trophoblasts and maternal decidual stromal cells secrete products that regulate trophoblast differentiation and migration into the maternal endometrium. Paracrine interactions between the extravillous trophoblast and the maternal decidua are important for successful embryonic implantation, including establishing the placental vasculature, anchoring the p…
GSE5810	17284666	GPL81	25	To screen for specific circadian outputs that may distinguish the pacemaker in the mammalian suprachiasmatic nucleus (SCN) from peripheral-type oscillators in which the canonical clockworks are similarly regulated in a circadian manner, the rhythmic behavior of the transcriptome in forskolin-stimulated NIH/3T3 fibroblasts was analyzed and compared to that found in the rat SCN in vivo and SCN2.2 c…
GSE5811	17234957	GPL339	41	Background: We hypothesized that spleen microarray gene expression profiles analyzed with contemporary pathway analysis software would provide molecular pathways of interest and target genes that might help explain the affect of bcl-2 on improving survival during sepsis.Methods: Two mouse models of sepsis, cecal ligation and puncture and tracheal instillation of Pseudomonas aeruginosa, were teste…
GSE5816	17194187	GPL570	42	AbstractBackground: Promoter hypermethylation coupled with loss of heterozygosity at the same locus results in loss of gene function in many tumor cells. The ârulesâ governing which genes are methylated during the pathogenesis of individual cancers, how specific methylation profiles are initially established, or what determines tumor-type specific methylation are unknown. However, DNA methyla…
GSE5817	-	GPL1261	21	Malformations of cortical development are the underlying eitiology of many cases of Mental Retardation and Epilepsy. Subtle, below the resolution of current MRI, cortical dysplasias are probably involved in many cases of MR, Epilepsy and Autism for which no diagnosis can currently be made. Therefore, understanding the process of cortical development will be vital in diagnosing and eventual treatm…
GSE582	12966135	GPL81	14	C57/BL6 to C57/BL6Balb/c to C57/BL6Balb/c to C57/BL6 with anti CD80/86 mAbIdentificaton of gene expression profile in tolerizing murine cardiac allograft by co-stimulatory blockade.The induction of specific tolerance would be the ultimate achievement in transplant immunology, but the precise mechanisms of immunological tolerance remain largely unknown. Here, we investigated global gene expression…
GSE5820	17010674	GPL96	29	Drug resistance remains a major obstacle to successful cancer treatment. Here we use a novel approach to identify rapamycin as a glucocorticoid resistance reversal agent. A database of drug-associated gene expression profiles was screened for molecules whose profile overlapped with a gene expression signature of glucocorticoid (GC) sensitivity/resistance in Acute Lymphoblastic Leukemia (ALL) cell…
GSE5823	17159920	GPL570	20	Affymetrix Hu133 GeneCHIP Microarray data for Control and c-MYC knock-down (KD) human cancer cell lines.Data related to article 'Novel c-MYC target genes mediate differential effects on cell proliferation and migration', from D. CAPPELLEN et al., EMBO ReportsNote: Samples GSM136093 and GSM136094 (Hela cell line, expt 1) were hybridized and normalized separately from the other 18 Samples.
GSE5824	17010674	GPL96	38	Drug resistance remains a major obstacle to successful cancer treatment. Here we use a novel approach to identify rapamycin as a glucocorticoid resistance reversal agent. A database of drug-associated gene expression profiles was screened for molecules whose profile overlapped with a gene expression signature of glucocorticoid (GC) sensitivity/resistance in Acute Lymphoblastic Leukemia (ALL) cell…
GSE5827	17114293	GPL570	28	The NOTCH1 signaling pathway directly links extracellular signals with transcriptional responses in the cell nucleus and plays a critical role during T-cell development and in the pathogenesis over 50% of human T-cell lymphoblastic leukemia (T-ALL) cases. However, little is known about the transcriptional programs activated by NOTCH1. Using an integrative systems biology approach we show that NOT…
GSE5840	-	GPL570	24	Compare the expression pattern of 17b-estradiol responsive genes in parent, OHT-resistant and ICI-resistant breast cancer cells.
GSE5847	-	GPL96	95	Tumor epithelium and surrounding stromal cells were isolated using laser capture microdissection of human breast cancer to examine differences in gene expression based on tissue types from inflammatory and non-inflammatory breast cancer
GSE5850	17148555	GPL570	12	Polycystic ovary syndrome (PCOS), the most common cause of anovulatory infertility, is characterized by increased ovarian androgen production, arrested follicle development, and is frequently associated with insulin resistance. These PCOS phenotypes are associated with exaggerated ovarian responsiveness to FSH and increased pregnancy loss. To examine whether the perturbations in follicle growth a…
GSE5859	17206142	GPL201	207	Expression level of genes in lymphoblasts from individuals in three HapMap populations (CEU, CHB, JPT) were compared. More than 1,000 genes were found to be significantly different (Pc<0.05) in mean expression level between the CEU and CHB+JPT samples.
GSE5883	-	GPL570	24	The vascular endothelium may play a role in the response to infectious agents and in the pathophysiology of disease processes resulting in capillary leak such as septic shock and acute respiratory distress syndrome. In order to study the effect of endotoxin on endothelial cell function, human lung microvascular endothelial cells in culture were exposed to lipopolysaccharide (LPS), 10 ng, for 4, 8…
GSE589	17260206	GPL85	18	mRNA gene expression was measured in rats at 6 (young), 26 (adult) and 52 (older) weeks of age at the time of fracture. Samples were collected at 0, 0.4, 1, 2, 4, and 6 weeks after fracture. RNA from two rats were pooled for each Affymetrix Rat U34A array.Keywords = ratKeywords = fractureKeywords = ageKeywords = timeKeywords = femur
GSE590	14991056	GPL96	10	Comparison of gene expression for individuals affected with FCHL exhibiting the USF1 susceptibility haplotype and FCHL affected indiviuals carrying the protective haplotype
GSE5900	17023574	GPL570	78	This series represents bone marrow aspirates from smoldering multiple myeloma patients
GSE5901	17288544	GPL81	20	In this study, we used microarray analysis to determine gene expression profile changes in the mouse prostate following castration and hormone replacement. We first identified genes with significant expression changes in each of these two processes and then generated a list of androgen responsive genes and a list of genes whose expression were inversely correlated with the presence of androgen. T…
GSE591	-	GPL81	18	Cardiac-specific TNF-alpha transgenic mice are an excellent model to study the pathologenesis of heart failure. Affymetrix U74V2A was used to analyze the gene expression profile of male and female wildtype FVB and TNF-alpha transgenic mice at the time point of compensated hypertrophy and dilated heart failure. 3 week, 13 week and 40 week samples examined.
GSE5913	17213802	GPL81	37	We have used microarray technology to identify the transcriptional targets of Rho subfamily GTPases. This analysis indicated that murine fibroblasts transformed by these proteins show similar transcriptomal profiles. Functional annotation of the regulated genes indicate that Rho subfamily GTPases target a wide spectrum of biological functions, although loci encoding proteins linked to proliferati…
GSE592	17260206	GPL85	18	Study of rat femur fracture healing in young (6 weeks old), adult (26 weeks old), and older (52 weeks old) rats with samples collected at 0 time (no fracture) and at 0.4, 1, 2, 4, and 6 weeks after fracture. RNA from two rats were pooled for each array.Keywords = rat, femur, fracture, age, time
GSE5923	17483316	GPL341	84	Renal gene expression profiles of Eker and wild type rats, gavaged with AA or OTA, respectively for 1, 3, 7 or 14 daysWe used Affymetrix RAE230A microarrays for the analysis of early gene expression changes in the renal cortex_ outer medulla of carcinogen treated Eker and corresponding wild type rats
GSE593	-	GPL96	10	Our study seeks to identify genes differentially expressed between uterine leiomyomas and normal myometrial tissue. This series consists of samples derived from normal myometrium and uterine leiomyomas obtained from fibroid afflicted patients.Total RNA was extracted from samples, converted to biotin-labeled cRNA, hybridized to oligonucleotide arrays, and followed by model based expression analysi…
GSE594	17260206	GPL85	54	mRNA gene expression was measured in intact female Sprague-Dawley rats at 6 (young), 26 (adult) and 52 (older) weeks of age at the time of fracture. Samples were collected at 0, 0.4, 1, 2, 4, and 6 weeks after fracture. RNA from two rats were pooled for each Affymetrix Rat U34A array. Mid-shaft, simple, transverse left femoral fractures were induced after retrograde intramedullary rod fixation wi…
GSE5944	-	GPL339	12	Purkinje cells (PC) of the cerebellum degenerate in adult mice with mutations in the Niemann-Pick type C (NPC) disease 1 (Npc1) gene. We subjected BALB/c Npc1+/+ and Npc1-/- mouse cerebella from an early and a later time point of PC degeneration to a genome-wide microarray gene expression analysis. We found general underrepresentation of PC-specific transcripts, consistent with PC loss, and eleva…
GSE5949	-	GPL95	60	Comparison between cell lines from 9 different cancer tissue of origin types (Breast, Central Nervous System, Colon, Leukemia, Melanoma, Non-Small Cell Lung, Ovarian, Prostate, Renal) from NCI-60 panel
GSE5949	-	GPL92	60	Comparison between cell lines from 9 different cancer tissue of origin types (Breast, Central Nervous System, Colon, Leukemia, Melanoma, Non-Small Cell Lung, Ovarian, Prostate, Renal) from NCI-60 panel
GSE5949	-	GPL93	60	Comparison between cell lines from 9 different cancer tissue of origin types (Breast, Central Nervous System, Colon, Leukemia, Melanoma, Non-Small Cell Lung, Ovarian, Prostate, Renal) from NCI-60 panel
GSE5949	-	GPL94	60	Comparison between cell lines from 9 different cancer tissue of origin types (Breast, Central Nervous System, Colon, Leukemia, Melanoma, Non-Small Cell Lung, Ovarian, Prostate, Renal) from NCI-60 panel
GSE5949	-	GPL91	60	Comparison between cell lines from 9 different cancer tissue of origin types (Breast, Central Nervous System, Colon, Leukemia, Melanoma, Non-Small Cell Lung, Ovarian, Prostate, Renal) from NCI-60 panel
GSE595	14625377	GPL91	14	Standard Affymetrix procedure, RNA from frozen tissue
GSE5967	15583081	GPL96	21	BACKGROUND: Assessment of gene expression in peripheral blood may provide a noninvasive screening test for allograft rejection. We hypothesized that changes in peripheral blood expression profiles would correlate with biopsy-proven rejection and would resolve after treatment of rejection episodes. METHODS AND RESULTS: We performed a case-control study nested within a cohort of 189 cardiac transpl…
GSE5968	-	GPL570	12	PGC-1 transcription factor was customized to limit its interations to ERRalpha. This mutant (2x9) was used to dissect the transcription activation patterns that are attributable to the PGC1-ERR interaction and PGC-1 actions that are independent of ERR. Inactive mutant with the deleted LLXXL motifs (L2L3) and wt PGC-1 were used as negative and positive controls respectively. BGAL-expressing constr…
GSE5987	16452189	GPL1261	11	Fifty million plaque-forming units of AdCre was injected into the right ovarian bursal cavity of 56- 70 day old female mice. Mice were euthanized 63 days later to obtain ovary tumors and normal ovary tissue. Seven individual ovarian tumors and 4 individual normal ovary samples were each assayed on an Affymetrix Mouse Genome 430 2.0 array.
GSE599	12642512	GPL85	11	Serum and glucocorticoid-induced kinase 1 (SGK1) activates the epithelial sodium channel (eNaC) in tubules. We examined renal SGK1 abundance in salt-adaptation and in salt-sensitive hypertension. Sprague-Dawley and Dahl salt-sensitive rats were placed on either 8% or 0.3% NaCl diets for 10 days. Plasma aldosterone levels were approximately 2.5-fold greater on 0.3% versus 8% NaCl diets in both rat…
GSE5999	17170095	GPL96	36	Microarray analysis to globally assess gene expression at the maternal-fetal interface
GSE5999	17170095	GPL97	36	Microarray analysis to globally assess gene expression at the maternal-fetal interface
GSE6004	17296934	GPL570	18	Papillary thyroid cancers (PTC) that invade into local structures are associated with a poor prognosis, but the mechanisms for PTC invasion are incompletely defined limiting the development of new therapies. To characterize biological processes involved in PTC invasion, we analyzed the gene expression profiles of microscopically dissected intratumoral samples from central and invasive regions of …
GSE6008	16452189	GPL96	103	99 individual ovarian tumors (37 endometrioid, 41 serous, 13 mucinous, and 8 clear cell carcinomas) and 4 individual normal ovary samples, each assayed on an Affymetrix HG_U133A array
GSE6011	17264171	GPL96	37	Albeit increased serum CK level and abnormal muscle histology are always present, boys with DMD are phenotipically indistinguishable from the normal ones at birth and, in their first years of life, acquire early motor milestones at normal times. A clear defect in muscle function becomes generally apparent by the end of the second year. As the disease is typically diagnosed between the ages of 3 a…
GSE6012	16918518	GPL96	20	The aim of this study was to find disease-associated genes in atopic eczema.
GSE6013	17331233	GPL570	27	Asbestos has been shown to cause chromosomal damage and DNA aberrations. The fiber is associated with many different lung diseases such as asbestosis, malignant mesothelioma, and lung cancer, but the disease-related processes are still largely unknown. Our aim was to identify specific gene expression profiles by using Affymetrix arrays, in human cell lines A549, Beas-2B, and MeT5A exposed to asbe…
GSE6015	16618801	GPL96	15	The Polycomb group (PcG) proteins form chromatin-modifying complexes that are essential for embryonic development and stem cell renewal and are commonly deregulated in cancer. Here, we identify their target genes using genome-wide location analysis in human embryonic fibroblasts. We find that Polycomb-Repressive Complex 1 (PRC1), PRC2, and tri-methylated histone H3K27 co-occupy >1000 silenced gen…
GSE6034	17895889	GPL570	16	Adult T-cell leukemia (ATL) is a fatal neoplasia derived from HTLV-1 infected T lymphocytes exhibiting constitutive activation of NF-kB. To elucidate the complex molecular mechanism of anti-tumor effect of the proteasome inhibitor, bortezomib in ATL cells, we attempted to perform gene expression profiling.
GSE6044	-	GPL201	47	Lung cancers are a heterogeneous group of diseases with respect to biology and clinical behavior. So far, diagnosis and classification are based on histological morphology and immunohistological methods for discrimination between two main histologic groups: small cell lung cancer (SCLC) and non-small cell lung cancer which account for 20% and 80% of lung carcinomas, respectively. While SCLCs expr…
GSE6046	17872505	GPL1261	10	A functional part of the Dicer gene was knocked out from MEF using a conditional knockout strainExpression of miRNA target genes were evaluated to gain better understanding of regulation by miRNAs
GSE6053	-	GPL571	12	White blood cells (WBCs) express tens of thousands of genes. Their expression levels are modified by genetic and external factors. In further study we found that gene expression profiles of these cellls can serve as surrogate markers for monitoring exercise and training load.The purpose of the present study was to investigate the effects of acute exercise on gene expression profiles (GEPs) of PBM…
GSE6065	-	GPL1261	100	Aims: To assess the virulence of multiple Aeromonas spp. using two models, a neonatal mouse assay and a mouse intestinal cell culture. Methods and Results: Transcriptional responses to both infection models were evaluated using microarrays. After artificial infection with a variety of Aeromonas spp., mRNA extracts from the two models were processed and hydridized to murine microarrays to determin…
GSE6065	-	GPL339	84	Aims: To assess the virulence of multiple Aeromonas spp. using two models, a neonatal mouse assay and a mouse intestinal cell culture. Methods and Results: Transcriptional responses to both infection models were evaluated using microarrays. After artificial infection with a variety of Aeromonas spp., mRNA extracts from the two models were processed and hydridized to murine microarrays to determin…
GSE6065	-	GPL340	84	Aims: To assess the virulence of multiple Aeromonas spp. using two models, a neonatal mouse assay and a mouse intestinal cell culture. Methods and Results: Transcriptional responses to both infection models were evaluated using microarrays. After artificial infection with a variety of Aeromonas spp., mRNA extracts from the two models were processed and hydridized to murine microarrays to determin…
GSE6093	17405122	GPL341	65	We used microarrays to identify genes implicated in breast cancer progression
GSE6116	17311802	GPL1261	70	The primary goal of toxicology and safety testing is to identify agents that have the potential to cause adverse effects in humans. Unfortunately, many of these tests have not changed significantly in the past 30 years and most are inefficient, costly, and rely heavily on the use of animals. The rodent cancer bioassay is one of these safety tests and was originally established as a screen to iden…
GSE6119	17109745	GPL1355	13	Glucosamine proved to be a potent, broad-spectrum inhibitor of IL-1beta. Of the 2,813 genes whose transcription was altered by IL-1beta stimulation (p<0.0001), glucosamine significantly blocked the response in 2,055 (~73%). Glucosamine fully protected the chondrocytes from IL-1-induced expression of inflammatory cytokines, chemokines and growth factors as well as proteins involved in PGE2 and NO …
GSE6120	15579438	GPL91	39	Gain-of-function mutations in exon 3 of beta-catenin (CTNNB1) are specific for Wilms' tumors that have lost WT1, but 50% of WT1-mutant cases lack such ""hot spot"" mutations. To ask whether stabilization of beta-catenin might be essential after WT1 loss, and to identify downstream target genes, we compared expression profiles in WT1-mutant versus WT1 wild-type Wilms' tumors. Supervised and nonsup…
GSE6135	17676035	GPL339	25	Inherited mutation in LKB1 results in the Peutz-Jeghers syndrome (PJS), characterized by intestinal hamartomas and a modestly increased frequency of gastrointestinal and breast cancer1. Somatic inactivation of LKB1 occurs in human lung adenocarcinoma2-4, but its tumor suppressor role in this tissue is unknown. Here we show that somatic Lkb1 deficiency strongly cooperates with somatic K-rasG12D ac…
GSE6136	17166848	GPL339	26	The dual bromodomain protein Brd2 is closely related to the basal transcription factor TAFII250, which is essential for cyclin A transactivation and mammalian cell cycle progression. In transgenic mice, constitutive lymphoid expression of Brd2 causes a malignancy most similar to human diffuse large B cell lymphoma. We compare the genome-wide transcriptional expression profiles of these lymphomas …
GSE614	14727137	GPL81	16	effect of +/- mutations in ES cells
GSE6184	17111047	GPL96	33	Anaplastic Large Cell Lymphomas (ALCL) represent a subset of lymphomas in which the Anaplastic Lymphoma Kinase (ALK) gene is frequently fused to the NPM gene. We previously demonstrated that the constitutive phosphorylation of ALK chimeric proteins is sufficient to induce cellular transformation in vitro and in vivo, and that ALK activity is strictly required for the survival of ALK positive ALCL…
GSE620	14583596	GPL96	11	Most individuals with cystic fibrosis (CF) carry one or two mutations that result in a maturation defect of the full-length CFTR protein. The deltaF508 mutation results in a mutant protein that is degraded by the proteasome instead of progressing to the apical membrane where it functions as a cyclic AMP-regulated chloride channel. 4 phenylbutyrate modulates heat shock protein expression and promo…
GSE620	14583596	GPL97	11	Most individuals with cystic fibrosis (CF) carry one or two mutations that result in a maturation defect of the full-length CFTR protein. The deltaF508 mutation results in a mutant protein that is degraded by the proteasome instead of progressing to the apical membrane where it functions as a cyclic AMP-regulated chloride channel. 4 phenylbutyrate modulates heat shock protein expression and promo…
GSE6205	17171682	GPL96	23	In order to investigate the patterns of genetic lesions in a panel of 23 Human Multiple Myeloma Cell Lines (HMCLs), we made a genomic integrative analysis involving FISH and both gene expression and genome-wide profiling approaches. The expression profiles of the genes targeted by the main IGH translocations showed that the WHSC1/MMSET gene involved in t(4;14)(p16;q32) was expressed at different …
GSE6206	-	GPL339	12	The absence of the Rb tumor suppressor gene changes levels/activities of transcription factors (e.g., E2F and p53) which alter gene expression patterns, related to cell cycle control and cellular response to DNA damage. Cisplatin is a genotoxic chemotherapeutic agent and wildtype or Rb null cells have different sensitivities to cisplatin-induced cytotoxicity.We used microarrays to compare global …
GSE6207	16549876	GPL570	14	This time course analysis is to study the targets and functions of miR-124. MiR-124 was overexpressed and the effect of miR-124 overexpression was compared to negative controls to identify downregulated genes and potential miRNA targets.
GSE6210	17141629	GPL1261	12	PGC1beta is a transcriptional coactivator that potently stimulates mitochondrial biogenesis and respiration of cells. Here, we have generated mice lacking exons 3 to 4 of the Pgc1beta gene (PGC1beta E3,4-/E3,4- mice). These mice express a mutant protein that has reduced coactivation activity on a subset of transcription factors, including ERRalpha, a major target of PGC1beta in the induction of m…
GSE6215	17356016	GPL341	10	The Brown Norway (BN) strain of rat is an inbred normotensive strain. BN rats of both sexes present some interesting pathophysiological phenotypes involving arteries and the kidneys. These include internal elastic lamina (IEL) ruptures in the abdominal aorta and iliac arteries, a deficit in aortic elastin content, a persistent ductus arteriosus, hydronephrosis and hematuria.Spontaneous rupture of…
GSE6223	-	GPL1261	13	The long term objective is to create an encyclopedia of the expression levels of all genes in multiple components of the developing bladder. The central thesis is straightforward. The combination ofmicrodissected and laser capture microdissection (LCM) plus microarray analysis offers a powerful, efficient and effective method for the creation of a global gene expression atlas of the developing ur…
GSE6236	17405831	GPL96	28	RNA from circulating blood reticulocytes was utilized to provide a robust description of genes transcribed at the final stages of erythroblast maturation. After depletion of leukocytes and platelets, Affymetrix HG-U133 arrays were hybridized with probe from total RNA isolated from blood sampled from 14 umbilical cords and 14 healthy adult humans.
GSE6236	17405831	GPL97	28	RNA from circulating blood reticulocytes was utilized to provide a robust description of genes transcribed at the final stages of erythroblast maturation. After depletion of leukocytes and platelets, Affymetrix HG-U133 arrays were hybridized with probe from total RNA isolated from blood sampled from 14 umbilical cords and 14 healthy adult humans.
GSE6238	15960800	GPL81	27	Background: Progressive neurological dysfunction is a key aspect of human aging. Because of underlying differences in the aging of mice and humans, useful mouse models have been difficult to obtain and study. We have used gene-expression analysis and polymorphism screening to study molecular senescence of the retina and hippocampus in two rare inbred mouse models of accelerated neurological senes…
GSE6246	15662539	GPL339	12	Microarray studies revealed that as a first hit, SV40 T/t-antigen causes deregulation of 462 genes in mammary gland cells (ME-cells) of WAP-SVT/t transgenic animals. The majority of deregulated genes are cell-proliferation specific and Rb-E2F dependent, causing ME-cell proliferation and gland hyperplasia but not breast cancer formation. In the breast tumor cells, a further 207 genes are different…
GSE6253	17194181	GPL96	18	We applied a meta-analysis of datasets from seven different microarray studies on lung cancer for differentially expressed genes related to survival time (under 2 y and over 5 y). Systematic bias adjustment in the datasets was performed by distance-weighted discrimination (DWD). We identified a gene expression signature consisting of 64 genes that is highly predictive of which stage I lung cancer…
GSE6253	17194181	GPL91	36	We applied a meta-analysis of datasets from seven different microarray studies on lung cancer for differentially expressed genes related to survival time (under 2 y and over 5 y). Systematic bias adjustment in the datasets was performed by distance-weighted discrimination (DWD). We identified a gene expression signature consisting of 64 genes that is highly predictive of which stage I lung cancer…
GSE6253	17194181	GPL97	18	We applied a meta-analysis of datasets from seven different microarray studies on lung cancer for differentially expressed genes related to survival time (under 2 y and over 5 y). Systematic bias adjustment in the datasets was performed by distance-weighted discrimination (DWD). We identified a gene expression signature consisting of 64 genes that is highly predictive of which stage I lung cancer…
GSE6259	17204652	GPL1261	21	Dendritic cells (DCs) process and present self and foreign antigens to induce tolerance or immunity. In vitro models suggest that induction of immunity is controlled by regulating the presentation of antigen, but little is known about how DCs control antigen presentation in vivo. To examine antigen processing and presentation in vivo we specifically targeted antigens to the two major subsets of D…
GSE6269	17105821	GPL570	22	Each infectious agent represents a unique combination of pathogen-associated molecular patterns that interact with specific pattern-recognition receptors expressed on immune cells. Therefore, we surmised that the blood immune cells of individuals with different infections might bear discriminative transcriptional signatures. Gene expression profiles were obtained for 131 peripheral blood samples …
GSE6269	17105821	GPL96	97	Each infectious agent represents a unique combination of pathogen-associated molecular patterns that interact with specific pattern-recognition receptors expressed on immune cells. Therefore, we surmised that the blood immune cells of individuals with different infections might bear discriminative transcriptional signatures. Gene expression profiles were obtained for 131 peripheral blood samples …
GSE6272	17456737	GPL96	36	Accurate and reproducible quantitation of target genes depends on correct normalization. Historically, genes with variable tissue transcription e.g. GAPDH, have been used as normalization factors which is problematic, particularly in clinical samples which often are derived from different tissue sources. Using a large-scale gene database (GeneChip (Affymetrix U133A) dataset of 36 gastrointestinal…
GSE6275	-	GPL1261	36	Inherited mutations of calcium ion channels exhibit neurological defects, such as epilepsy, ataxia, and migraine, and these phenotypes are shared among humans and mouse models. Absence epilepsy and ataxic phenotypes are present in the calcium channelopathy mutants stargazer (stg-gamma2 subunit), tottering (tg-alpha1 subunit), and lethargic (lh-beta4 subunit). These mutations of high-voltage-activ…
GSE628	15297311	GPL81	18	G1E cells are a Gata-1 erythroid-committed cell line derived from targeted disruption of Gata-1 in embryonic stem cells. The ER4 subclone contains an inducible form of Gata-1 (Gata-1-ER, Gata-1 fused to the estradiol receptor ligand binding domain). We performed transcriptome analysis using this cell line. Estradiol was added to culture medium triggering synchronous and homogenous differentiation…
GSE6281	17597826	GPL570	34	Genes involved in the inflammatory response resulting in allergic contact dermatitis (ACD) are only partly known. In this study, we introduce the use of high density oligonucleotide arrays for gene expression profiling in human skin during the elicitation of ACD. Skin biopsies from normal and nickel-exposed skin were obtained from 7 nickel-allergic patients and 5 non-allergic controls at four dif…
GSE6283	-	GPL570	21	Background: Among full autosomal trisomies, only trisomies of chromosome 21 (Down syndrome, DS), 18 (Edward syndrome, ES) and 13 (Patau syndrome, PS) are compatible with postnatal survival. But the mechanisms, how a supernumerary chromosome disrupts the normal development and causes specific phenotypes, are still not fully explained. As an alternative to gene dosage effects due to the trisomic ch…
GSE6290	-	GPL1261	37	The long term objective is to create an encyclopedia of the expression levels of all genes in multiple components of the developing kidney. The central thesis is straightforward. The combination of laser capture microdissection (LCM) plus microarray analysis offers a powerful, efficient and effective method for the creation of a global gene expression atlas of the developing kidney. Microarrays w…
GSE63	12374626	GPL81	17	A catalytic antioxidant (AEOL 10150) attenuates expression of inflammatory genes in stroke.White and grey matter in the distribution on the middle cerebral artery 6 hours after administration of the saline/catalytic antioxidant AEOL 10150 and ischemia/reperfusion of the MCAO; pooled mRNA from 6 brains.Keywords = stroke, antioxidant
GSE6309	-	GPL81	12	Our laboratory's interest is in understanding the molecular principles that underlie the regional organization of the mammalian metanephric kidney. Our goal is to generate a detailed spatial map of the cellular expression of selected regulatory genes during mammalian kidney development. The goal of this study is to identify genes expressed during the morphogenesis of the nephron. By profiling two…
GSE6313	-	GPL81	10	High-throughput systems for gene expression profiling have been developed and matured rapidly through the past decade. Broadly, these can be divided into two categories: hybridization-based and sequencing-based approaches. With data from different technologies being accumulated, concerns and challenges are raised regarding data comparability and agreement across technologies. Within an ongoing la…
GSE6321	17287849	GPL571	12	CD38 expression is an important prognostic marker in CLL with high levels of CD38 associated with shorter overall survival. In this study, we used gene expression profiling and protein analysis of highly purified cell-sorted CD38+ and CD38- chronic lymphocytic leukemia cells to elucidate a molecular basis for the association between CD38 expression and inferior clinical outcome. Paired CD38+ and …
GSE6323	17381838	GPL339	15	We investigated age-related changes in the transcriptional profile of skeletal muscle in 5 month old (young) and 25 month old (old) C57BL/6NHsd mice using high density oligonucleotide arrays (22,690 transcripts probed). We identified 712 transcripts that are differentially expressed in young (5 month old) and old (25-month old) mouse skeletal muscle. Caloric restriction (CR) completely or partial…
GSE6332	-	GPL85	12	The etiology of trauma-hemorrhage shock-induced acute lung injury has been difficult to elucidate due, at least in part, to the inability of in vivo studies to separate the non-injurious pulmonary effects of trauma-hemorrhage from the tissue injurious ones. To circumvent this in vivo limitation, we utilized a model of trauma-hemorrhagic shock (T/HS) in which T/HS-lung injury was abrogated by divi…
GSE6338	17304354	GPL570	60	Peripheral T-cell lymphoma unspecified (PTCL/U), the most common form of PTCL, displays heterogeneous morphology and phenotype, poor response to treatment, and dismal prognosis. We demonstrate that PTCL/U shows a gene expression profile clearly distinct from that of normal T-cells. Comparison with the profiles of purified T-cell subpopulations [CD4+, CD8+, resting (HLA-DR-), and activated (HLA-DR…
GSE6344	17699851	GPL96	20	Although renal cell carcinoma (RCC) is the sixth-leading cause of cancer death, the molecular events leading to disease onset and progression are not well understood. Genomic profiling of clear cell RCC (cRCC) patients indicated that loss of a negative regulator of the Wnt pathway, secreted frizzled-related protein 1 (sFRP1), occurred in the majority of more than 100 patients tested. To our knowl…
GSE6344	17699851	GPL97	20	Although renal cell carcinoma (RCC) is the sixth-leading cause of cancer death, the molecular events leading to disease onset and progression are not well understood. Genomic profiling of clear cell RCC (cRCC) patients indicated that loss of a negative regulator of the Wnt pathway, secreted frizzled-related protein 1 (sFRP1), occurred in the majority of more than 100 patients tested. To our knowl…
GSE635	15295046	GPL96	173	Cellular drug resistance is associated with an unfavorable prognosis in pediatric acute lymphoblastic leukemia (ALL). To identify genes conferring resistance to antileukemic agents, we analyzed the expression of >12,700 genes in sensitive and resistant ALL cells obtained at diagnosis from 174 patients. This revealed 42, 59, 54 and 22 genes (Pâ€0.001) that were differentially expressed in B-linea…
GSE6353	17188367	GPL85	10	IFN-gamma is a classical microglial stimulant. We used microarrays to investigate the microglial gene regulatory network activated by interferon-gamma.
GSE6364	17510236	GPL570	37	The transition of regularly cycling endometrium from the proliferative or Estrogen-dominant phase of the menstrual cycle to the Progesterone-dominant Early and Mid Secretory phases requires wide-spread changes in gene expression that shift the endometrium from a proliferative capacity to a differentiated 'decidual' phenotype in preparation for implantation. This process appears delayed in women w…
GSE6365	17229636	GPL96	90	Background and objective: The chromosome 13 deletion (del(13)) represents one of the most frequent chromosomal alterations in multiple myeloma (MM). del(13) is associated with an unfavorable prognosis, although there is an increasing agreement that its prognostic relevance has to be related to the ploidy status and the presence of different chromosomal translocations. This study is aimed at provi…
GSE6388	-	GPL81	34	To examine irreversible changes in the developing brain following seizures, juvenile inbred mice were intraperitoneally injected with kainate and nicotine.
GSE6397	17446932	GPL1261	15	The present research is devoted to the identification of gene(s) severely affected by LMNA mutations, leading to striated muscle laminopathies and more specifically the cardiomyopathy. For this purpose, we developped a large-scale gene expression approach on heart and skeletal tissues from Lmna H222P heterozygous Knock-In mouse model.
GSE6398	17446932	GPL1261	14	The present research is devoted to the identification of gene(s) severely affected by LMNA mutations, leading to striated muscle laminopathies and more specifically the cardiomyopathy. For this purpose, we developped a large-scale gene expression approach on heart and skeletal tissues from Lmna H222P heterozygous Knock-In mouse model.
GSE6399	17567779	GPL1261	14	The present research is devoted to the identification of gene(s) severely affected by EMD mutations, leading to striated muscle laminopathies and more specifically the cardiomyopathy. For this purpose, we developped a large-scale gene expression approach on heart and skeletal tissues from Emd KO mouse model.
GSE640	14526100	GPL82	17	A multitude of genes expressed solely in meiotic or postmeiotic spermatogenic cells offers a myriad of contraceptive targets.Understanding mammalian spermatozoan development and the events surrounding fertilization has grown slowly, in part because of uncertainty about the number and identity of the cellular components involved. Determination of those transcripts expressed specifically by germ ce…
GSE640	14526100	GPL81	17	A multitude of genes expressed solely in meiotic or postmeiotic spermatogenic cells offers a myriad of contraceptive targets.Understanding mammalian spermatozoan development and the events surrounding fertilization has grown slowly, in part because of uncertainty about the number and identity of the cellular components involved. Determination of those transcripts expressed specifically by germ ce…
GSE640	14526100	GPL83	17	A multitude of genes expressed solely in meiotic or postmeiotic spermatogenic cells offers a myriad of contraceptive targets.Understanding mammalian spermatozoan development and the events surrounding fertilization has grown slowly, in part because of uncertainty about the number and identity of the cellular components involved. Determination of those transcripts expressed specifically by germ ce…
GSE6400	17233922	GPL570	12	The goal of this project was to characterize changes in gene expression in response to the anti-cancer agent sapphyrin PCI-2050. Cultured A549 human lung cancer cells were treated with sapphyrin PCI-2050 or actinomycin D, a known transcripitonal inhibitor. The gene expression profiles of drug-treated and control A549 cultures were determined using Human Genome U133 Plus 2.0 Arrays (Affymetrix, Sa…
GSE6401	17367409	GPL96	102	Karyotypic instability, including numerical and structural chromosomal aberrations, represents a distinct feature of multiple myeloma (MM). 40-50% of patients displayed hyperdiploidy, defined by recurrent trisomies of non-random chromosomes. To characterize hyperdiploid (H) and nonhyperdiploid (NH) MM molecularly, we analyzed the gene expression profiles of 66 primary tumors, and used FISH to inv…
GSE642	15075187	GPL81	12	RNA of Kidney was extracted using a Quiagen RNeasy kit. Targets were produced using standard Affymetrix procedures from about 8ug of total RNA.
GSE6428	15520459	GPL341	25	This SuperSeries is composed of the following subset Series:GSE1589: Targets of HNF1b, HNF4a2 and HNF6 in INS-1 cellsGSE1590: Targets of HNF1b mutants in INS-1GSE1591: INS-1 cell lines (FLP-In T-REx)
GSE643	15295046	GPL96	81	primary ALL cells (B- and T-lineage) sensitive to L-asparaginase by the MTT in vitro sensitivity assayKeywords = ALL
GSE6431	15780141	GPL91	36	This SuperSeries is composed of the following subset Series:GSE570: HeLa CD4+ transfectionGSE571: HeLa CD4+ cells transfected with epitope-tagged eTat plasmidsGSE572: HeLa CD4+ cells transfected with parental vector pCep4
GSE6432	15159079	GPL96	32	This SuperSeries is composed of the following subset Series:GSE409: IMR-90 cells: Collagen Mesh Time CourseGSE410: IMR-90 cells: Tissue Culture Polystyrene Time Course
GSE6433	16495776	GPL85	24	This SuperSeries is composed of the following subset Series:GSE357: Halothane Repetitive ExposureGSE358: Isoflurane Repetitive ExposureGSE752: Halothane/Isoflurane Repetitive Exposures
GSE6434	-	GPL91	24	This SuperSeries is composed of the following subset Series:GSE349: ResistantGSE350: Sensitive
GSE6439	-	GPL81	12	This SuperSeries is composed of the following subset Series:GSE108: OVX/P4/6h/UTX 129 WT vs. Hoxa-10-/-GSE109: OVX/oil/6h/UTX 129 WT vs. Hoxa-10-/-
GSE6440	-	GPL81	11	This SuperSeries is composed of the following subset Series:GSE106: OVX/P4/UTX 129/SvImJ WT AGSE107: OVX/P4/UTX 129/SvImJ WT B
GSE6443	17379758	GPL339	10	KrÃŒppel-like factor 9 (Klf9), a zinc-finger transcription factor, is implicated in the control of cell proliferation, cell differentiation and cell fate in brain and uterus. Using Klf9 null mutant mice, we have investigated the involvement of Klf9 in small intestine crypt-villus cell renewal and lineage determination. We report the predominant expression of Klf9 gene in small intestine smooth mu…
GSE645	15295046	GPL96	45	primary ALL cells (B- and T-lineage) resistant to L-asparaginase by the MTT in vitro sensitivity assayKeywords = ALL
GSE6453	17486082	GPL339	14	The aim was to carry out global analysis of gene expression changes occurring in the normal pubertal mouse mammary gland from the appearance to the regression of terminal end buds.
GSE646	15295046	GPL96	66	primary ALL cells (B- and T-lineage) sensitive to prednisolone by the MTT in vitro sensitivity assayKeywords = ALL
GSE6462	-	GPL571	57	ErbB receptor ligands, epidermal growth factor (EGF) and heregulin (HRG), induce dose-dependent transient and sustained intracellular signaling, proliferation and differentiation of MCF-7 breast cancer cells, respectively. In an effort to delineate the ligand-specific cell determination mechanism, we investigated time-course gene expressions induced by EGF and HRG that induce distinct cellular ph…
GSE6467	-	GPL339	30	Atypical antipsychotic Clozapine has a superior antipsychotic and antimanic effects compared to other antisphicotics. Its widespread use was limited by the side effects of agranulocytosis, cardiomyopathy and metabolic anomalies such as weight gain, and diabetes. Very little is known about mechanisms by which Clozapine works. The aim of this experiment is to compare the chronic gene expression pro…
GSE647	15295046	GPL96	27	primary ALL cells (B- and T-lineage) resistant to prednisolone by the MTT in vitro sensitivity assayKeywords = ALL
GSE6475	16528362	GPL571	18	The pathogenesis of acne has been linked to multiple factors such as increased sebum production, inflammation, follicular hyperkeratinization, and the action of Propionibacterium acnes within the follicle. In an attempt to understand the specific genes involved in inflammatory acne, we performed gene expression profiling in acne patients. Skin biopsies were obtained from an inflammatory papule an…
GSE6477	17409404	GPL96	162	Multiple myeloma is a relatively common B-cell malignancy that is currently incurable. Certain recurrent genetic abnormalities characteristics of different genetic subtypes have been described. Hyperdiploid myeloma characterized by recurrent trisomies is the most common genetic subtypes. However little is know about it's biology. Another common genetic abnormality is chromosome 13 deletion which …
GSE648	15295046	GPL96	89	primary ALL cells (B- and T-lineage) sensitive to vincristine by the MTT in vitro sensitivity assayKeywords = ALL
GSE6481	17464315	GPL96	105	In soft tissue sarcomas, diagnosis of malignant fibrous histiocytoma (MFH) has been a very controversial issue, and MFH is now considered to be reclassified into pleomorphic subtypes of other sarcomas. To characterize and reclassify MFH genetically, we analyzed gene expression in 105 samples from ten types of soft tissue tumors.
GSE6487	-	GPL1261	30	The transcription factor MyoD can coax na?e fibroblasts or otherwise committed cells to adopt the skeletal muscle phenotype by activating the muscle gene expression program. Activation of muscle gene expression occurs in quantal steps with not all the target genes of MyoD being activated at the same time. Some genes are induced in the initial phases, others at later stages despite the fact that M…
GSE649	15295046	GPL96	36	primary ALL cells (B- and T-lineage) resistant to vincristine by the MTT in vitro sensitivity assayKeywords = ALL
GSE6497	-	GPL1355	15	Microarray analyses provide a powerful approach to identify gene expression alterations following kidney transplantation. However, the heterogeneity of human kidney transplant specimens and the variation in sample preparation precludes conclusions regarding the underlying mechanisms of the observed alterations. We used a well defined experimental rat kidney transplantation model with consistent t…
GSE650	15295046	GPL96	94	primary ALL cells (B- and T-lineage) sensitive to daunorubicinby the MTT in vitro sensitivity assayKeywords = ALL
GSE6503	17676974	GPL339	14	Age-related defects in stem cells can limit proper tissue maintenance and hence contribute to a shortened life-span. Using highly purified hematopoietic stem cells from mice aged 2 to 21 months, we demonstrate a deficit in function yet an increase in stem cell number with advancing age. Expression analysis of more than 14,000 genes identified 1500 that were age-induced and 1600 that were age-repr…
GSE6509	17375196	GPL339	37	The study was designed in order to identify genes differentially expressed when glucocorticoid signaling is blocked by a glucocorticoid-receptor antagonist (RU486 â mifepristone) in the context of brain inflammation induced by bacterial lipopolysaccharide (LPS). LPS is only able to cause murine brain damage in our experimental conditions upon RU486 pre-treatment. Hence, the study may reveal pot…
GSE651	15295046	GPL96	28	primary ALL cells (B- and T-lineage) resistant to daunorubicin by the MTT in vitro sensitivity assayKeywords = ALL
GSE6512	-	GPL339	30	This SuperSeries is composed of the following subset Series:GSE6467: Twelve weeks expression data of the antipsychotics Clozapine and Haloperidol in the mouse brain (Affymetrix, GCRMA).GSE6511: Four weeks expression data of the antipsychotics Clozapine and Haloperidol in the mouse brain (Affymetrix, GCRMA).
GSE6514	17698924	GPL1261	90	These studies address temporal changes in gene expression during spontaneous sleep and extended wakefulness in the mouse cerebral cortex, a neuronal target for processes that control sleep; and the hypothalamus, an important site of sleep regulatory processes. We determined these changes by comparing expression in sleeping animals sacrificed at different times during the lights on period, to that…
GSE6519	17426818	GPL570	12	Docosahexaenoic acid (DHA, 22:6n-3) and arachidonic acid (ARA, 20:4n-6) are the major long chain polyunsaturated fatty acids (LCPUFA) of the central nervous system. We examined the alterations in transcriptional profiles in neonate baboon cerebral cortex brain tissue using high-density Affymetrix oligonucleotide arrays (""U133 plus 2.0""). Twelve neonates were divided into 3 groups: Control (C, n…
GSE6521	-	GPL570	37	ErbB receptor ligands, epidermal growth factor (EGF) and heregulin (HRG), induce dose-dependent transient and sustained intracellular signaling, proliferation and differentiation of MCF-7 breast cancer cells, respectively. In an effort to delineate the ligand-specific cell determination mechanism, we investigated time-course gene expressions induced by EGF and HRG that induce distinct cellular ph…
GSE6526	17327490	GPL1261	16	The cardiovascular restricted transcription factor CHF1/Hey2 has been previously shown to regulate the smooth muscle response to growth factors. To determine how CHF1/Hey2 affects the smooth muscle response to growth factors, we performed a genomic screen for transcripts that are differentially expressed in wild type and knockout smooth muscle cells after stimulation with platelet derived growth …
GSE6527	16734774	GPL340	36	The cortex and hippocampus were dissected from each individual mouse. Targets from three biological replicates of earlybird mutants and their wildtype littermates and six replicates of Rab3a knockouts and wildtype littermates were generated and the expression profiles were determined using Affymetrix MOE430 A and B arrays. Comparisons between the sample groups allow the identification of tissue s…
GSE6527	16734774	GPL339	36	The cortex and hippocampus were dissected from each individual mouse. Targets from three biological replicates of earlybird mutants and their wildtype littermates and six replicates of Rab3a knockouts and wildtype littermates were generated and the expression profiles were determined using Affymetrix MOE430 A and B arrays. Comparisons between the sample groups allow the identification of tissue s…
GSE653	15295046	GPL96	66	primary ALL cells (B-lineage) sensitive to L-asparaginase by the MTT in vitro sensitivity assayKeywords = ALL
GSE6532	17401012	GPL570	87	Purpose: A number of microarray studies have reported distinct molecular profiles of breast cancers (BC): basal-like, ErbB2-like and two to three luminal-like subtypes. These were associated with different clinical outcomes. However, although the basal and the ErbB2 subtypes are repeatedly recognized, identification of estrogen receptor (ER)-positive subtypes has been inconsistent. Refinement of …
GSE654	15295046	GPL96	40	primary ALL cells (B-lineage) resistant to L-asparaginase by the MTT in vitro sensitivity assayKeywords = ALL
GSE655	15295046	GPL96	54	primary ALL cells (B-lineage) sensitive to prednisolone by the MTT in vitro sensitivity assayKeywords = ALL
GSE656	15295046	GPL96	20	primary ALL cells (B-lineage) resistant to prednisolone by the MTT in vitro sensitivity assayKeywords = ALL
GSE6565	17565682	GPL570	10	Cartilage plays a fundamental role in the development of the human skeleton. Early in embryogenesis, mesenchymal cells condense and differentiate to chondrocytes to shape the early skeleton. Subsequently, the cartilage anlagen differentiate to form the growth plates, which are responsible for linear bone growth, and the articular chondrocytes, which facilitate joint function. However, despite the…
GSE6569	17332353	GPL96	23	Transcriptional profiling was conducted on RNA from 23 breast cancer cell lines to identify genes whose expression level correlates with sensitivity of particular drug
GSE6569	17332353	GPL97	23	Transcriptional profiling was conducted on RNA from 23 breast cancer cell lines to identify genes whose expression level correlates with sensitivity of particular drug
GSE657	15295046	GPL96	75	primary ALL cells (B-lineage) sensitive to vincristine by the MTT in vitro sensitivity assayKeywords = ALL
GSE658	15295046	GPL96	29	primary ALL cells (B-lineage) resistant to vincristine by the MTT in vitro sensitivity assayKeywords = ALL
GSE6589	-	GPL1261	11	The long term objective is to create an encyclopedia of the expression levels of all genes in multiple components of the developing kidney. The central thesis is straightforward. The combination of laser capture microdissection (LCM) plus microarray analysis offers a powerful, efficient and effective method for the creation of a global gene expression atlas of the developing kidney. Microarrays w…
GSE659	15295046	GPL96	82	primary ALL cells (B-lineage) sensitive to daunorubicin by the MTT in vitro sensitivity assayKeywords = ALL
GSE6591	17726092	GPL1261	15	We hypothesize that gene expression in the aging lungs of these two strains of mice are divergent thus contributing to the disparity in the phenotypes. More specifically, (1) Aging DBA/2J mice compared to aging C57BL/6 mice are known to be accelerated in their lung physiology and morphometry; (2) C57BL/6J are known to have longer natural longevity than DBA/2J mice. In order to test these hypothes…
[truncated: 346 more rows]
