# Supplementary material for: TranscriptomeBrowser: A Powerful and Flexible Toolbox to Explore Productively the Transcriptional Landscape of the Gene Expression Omnibus Database
Source: PLoS One. 2008 Dec 23;3(12):e4001. doi: 10.1371/journal.pone.0004001 (PMC2602602; doi:10.1371/journal.pone.0004001)
Supplement: Table S3 — This matrix summarizes the results obtained using the “ESR1 & GATA3 & FOXA1” query. Rows correspond to genes and columns to TS. The presence of a given gene in a given TS is indicated by 1 (default 0). (0.66 MB XLS) [file pone.0004001.s009.xls]

## Sheet: Feuille1
Platform	GPL96	GPL570	GPL96	GPL96	GPL96	GPL96	GPL96	GPL96	GPL96	GPL96	GPL570	GPL96	GPL96	GPL570	GPL91	GPL96
TS_ID	0F2635383	3DE64836D	59A18E225	6C975B20B	6C975B290	7150E17F6	8059848B4	84E5E1077	8F69864F9	A151D5695	B79B1C0B9	BDB6D8700	D8F0B528C	E2E620F40	EA9669A21	F310ACC36		number of hits
ERBB4	1	1	1	1	1	1	1	1	1	1	1	1	1	1	1	1		16
ESR1	1	1	1	1	1	1	1	1	1	1	1	1	1	1	1	1		16
GATA3	1	1	1	1	1	1	1	1	1	1	1	1	1	1	1	1		16
ANXA9	1	1	1	1	1	1	1	1	1	1	1	1	1	1	1	1		16
FOXA1	1	1	1	1	1	1	1	1	1	1	1	1	1	1	1	1		16
MCCC2	1	1	1	1	1	1	1	1	1	1	1	1	1	1	0	1		15
MLPH	1	1	1	1	1	1	1	1	1	1	1	1	1	1	0	1		15
SLC39A6	0	1	1	1	1	1	1	1	1	0	1	1	1	1	1	1		14
ABAT	1	1	1	1	1	0	1	1	1	1	1	0	1	1	1	1		14
TBC1D9	1	1	1	0	0	1	1	1	1	1	1	1	1	1	1	1		14
CA12	1	1	1	1	1	0	1	1	0	1	1	1	1	1	1	1		14
LOC400451	1	1	1	1	1	0	1	1	1	1	1	1	1	1	0	1		14
XBP1	1	1	1	0	0	0	1	1	1	1	1	1	1	1	1	1		13
JMJD2B	1	1	1	1	1	0	1	1	0	1	0	1	1	1	1	1		13
CIRBP	1	1	1	0	0	1	1	1	0	1	1	1	1	1	1	1		13
LRBA	1	0	1	1	1	1	0	1	1	1	1	0	1	1	1	1		13
BCAM	1	1	1	1	1	1	1	1	0	1	0	1	1	1	1	0		13
SLC22A5	1	1	1	1	1	0	1	1	0	1	1	1	0	1	1	1		13
RHOB	1	0	1	1	1	1	1	1	0	1	1	1	1	1	0	1		13
MAGED2	0	1	1	0	0	0	1	1	1	1	1	1	1	1	1	1		12
LASS6	1	0	1	1	1	1	1	1	1	1	1	0	1	0	0	1		12
NAT1	1	0	1	0	0	1	1	1	0	1	1	1	1	1	1	1		12
GREB1	1	1	1	1	1	0	1	1	0	0	1	1	0	1	1	1		12
REEP5	1	1	0	1	1	1	0	1	0	1	1	1	0	1	1	1		12
RNF103	1	0	1	0	0	1	1	1	0	1	1	1	1	1	1	1		12
SLC7A8	1	1	1	1	1	0	0	1	0	1	1	1	1	1	0	1		12
KRT18	1	0	1	0	0	1	1	1	1	1	1	0	1	1	1	1		12
SPDEF	1	1	1	0	0	1	1	1	1	1	1	1	0	0	0	1		11
KIAA0232	1	0	1	1	1	0	1	1	0	1	0	0	1	1	1	1		11
FBP1	1	1	0	0	0	1	1	1	0	1	1	1	0	1	1	1		11
GPD1L	1	1	1	1	1	1	0	1	0	1	1	0	0	1	0	1		11
NME3	1	0	1	0	0	1	1	1	0	1	1	1	1	0	1	1		11
ROGDI	1	0	1	0	0	0	1	1	1	1	1	1	1	1	0	1		11
PH-4	1	1	1	0	0	1	1	1	0	1	1	0	1	1	0	1		11
BHLHB2	0	1	1	1	1	0	1	1	0	0	1	1	1	1	1	0		11
IL6ST	0	0	1	1	1	0	1	1	0	0	1	1	1	1	1	1		11
SEMA3F	1	0	1	0	0	1	1	1	0	1	1	1	0	1	1	1		11
MYO5C	1	0	1	1	1	0	1	1	0	1	1	0	1	1	0	1		11
THSD4	0	1	1	0	0	0	1	1	0	1	1	1	1	1	1	1		11
WWP1	1	0	1	0	0	1	0	1	0	1	1	1	1	1	1	1		11
ERBB3	1	0	1	0	0	1	1	1	1	1	0	0	1	1	1	1		11
BTG2	1	1	1	1	1	1	0	1	0	0	1	0	1	1	1	0		11
CYB5R1	0	0	1	1	1	1	0	1	1	0	1	1	1	1	0	1		11
MAPT	1	0	1	1	1	0	1	1	0	0	0	1	1	1	1	1		11
C6orf211	1	0	1	0	0	1	1	1	0	1	1	1	1	1	0	1		11
TEGT	1	0	0	1	1	0	1	1	0	1	1	1	0	1	1	1		11
SCUBE2	0	1	1	1	1	0	1	1	0	0	1	1	1	1	0	1		11
AGR2	1	1	1	0	0	0	0	1	1	1	1	0	0	1	1	1		10
DNAJC12	0	0	1	0	0	1	1	1	0	1	1	1	1	1	0	1		10
KIAA1467	0	1	0	1	1	1	1	1	0	0	1	1	0	1	0	1		10
AR	1	1	1	0	0	0	0	1	1	1	1	1	0	1	0	1		10
TFF3	1	1	1	0	0	0	0	1	0	1	1	0	1	1	1	1		10
RAB26	1	0	1	0	0	1	0	1	1	1	1	1	0	1	0	1		10
KIAA0040	1	0	1	1	1	0	0	1	0	1	0	1	1	1	0	1		10
MAST4	0	1	1	0	0	0	1	1	0	1	1	1	1	1	1	0		10
CSAD	1	1	1	0	0	1	1	0	0	0	1	1	1	1	0	1		10
AP1G1	1	0	1	1	1	0	1	1	0	1	0	1	1	0	0	1		10
BCL2	0	0	1	1	1	0	1	1	0	0	0	1	1	1	1	1		10
TFF1	1	1	1	0	0	0	0	1	0	1	1	0	1	1	1	1		10
SIDT1	1	1	1	0	0	0	0	1	1	1	1	1	0	1	0	1		10
CELSR1	1	0	1	0	0	0	1	1	0	0	1	1	1	1	1	1		10
KIAA1324	1	1	1	0	0	0	1	1	0	1	0	1	1	1	0	1		10
DACH1	1	1	1	0	0	0	1	1	0	0	1	0	1	1	0	1		9
PBX1	1	0	1	0	0	0	1	1	0	0	1	1	0	1	1	1		9
WFS1	0	1	0	1	1	0	0	1	0	1	1	1	0	1	0	1		9
MYB	1	0	1	0	0	0	1	1	1	0	0	0	1	1	1	1		9
ELOVL5	0	0	0	0	0	0	1	1	0	1	1	1	1	1	1	1		9
TSPAN13	1	1	1	0	0	1	0	1	0	1	0	1	0	1	0	1		9
CSNK1A1	1	0	1	0	0	1	1	1	0	0	1	1	0	0	1	1		9
ACADSB	0	1	0	0	0	0	1	1	1	0	1	1	0	1	1	1		9
SLC35E2	1	0	1	0	0	1	1	1	0	1	0	0	1	0	1	1		9
DAZAP2	1	1	1	0	0	1	0	1	0	0	1	0	1	1	0	1		9
MAN2B2	1	0	0	0	0	1	0	1	0	1	1	1	0	1	1	1		9
EVL	0	1	1	0	0	1	1	1	0	0	1	1	1	1	0	0		9
BBS1	1	0	1	0	0	1	1	1	0	0	0	1	1	1	0	1		9
KIAA0423	1	0	0	0	0	1	1	1	0	0	1	1	0	1	1	1		9
SCNN1A	0	0	1	1	1	1	0	1	0	1	1	0	0	1	0	1		9
MRPS14	1	0	1	0	0	1	1	1	0	0	0	1	0	1	0	1		8
GALNT7	0	0	1	0	0	0	0	1	1	1	1	1	0	1	0	1		8
DALRD3	1	0	1	0	0	1	0	1	0	1	1	0	0	1	0	1		8
TPBG	0	1	0	0	0	0	0	1	0	0	1	1	1	1	1	1		8
NOVA1	0	1	0	0	0	0	1	1	0	0	1	1	0	1	1	1		8
MOAP1	1	0	0	0	0	1	1	1	0	0	1	0	0	1	1	1		8
DNALI1	0	1	1	0	0	0	1	1	0	0	1	1	0	1	0	1		8
SH3BGRL	0	0	1	0	0	1	1	1	0	1	0	1	1	0	1	0		8
SLC19A2	1	0	1	0	0	0	1	1	0	0	1	1	0	1	0	1		8
YTHDC2	0	0	1	1	1	0	1	0	0	0	1	1	0	1	0	1		8
FAAH	1	0	1	0	0	0	1	1	1	0	0	0	0	1	1	1		8
NPDC1	1	0	1	0	0	1	0	1	0	1	1	0	0	1	0	1		8
ALDH6A1	1	0	0	0	0	1	1	1	0	0	0	0	1	1	1	1		8
SLC44A4	0	0	1	0	0	0	1	1	1	1	0	0	1	1	0	1		8
RAB17	1	0	1	0	0	0	0	1	1	1	1	0	0	1	0	1		8
C9orf116	1	0	1	0	0	0	1	1	0	1	0	0	1	1	0	1		8
NME5	0	0	1	0	0	0	1	1	0	1	0	1	1	1	1	0		8
ZNF467	1	0	1	0	0	1	0	0	0	1	1	1	0	1	0	1		8
LRIG1	1	0	1	0	0	0	1	1	0	1	0	0	1	1	1	0		8
IVD	1	0	1	1	1	0	0	1	0	0	1	0	0	1	0	1		8
FAM63A	1	0	1	0	0	0	1	1	0	0	0	1	1	1	0	1		8
ACVR1B	1	0	1	0	0	1	0	1	0	1	1	0	0	1	0	1		8
ZNF552	1	0	1	0	0	0	1	1	1	1	0	0	0	1	0	1		8
ASAH1	1	0	1	0	0	1	1	1	0	0	1	1	0	1	0	0		8
MRFAP1L1	1	0	1	0	0	1	0	1	0	1	0	1	1	0	0	1		8
MYST4	1	0	1	0	0	1	0	1	0	0	0	1	1	1	0	1		8
TJP3	1	0	1	0	0	0	1	1	1	1	0	0	0	0	1	1		8
CYB5A	1	0	1	0	0	1	1	1	0	1	1	1	0	0	0	0		8
SKP1A	0	1	0	0	0	0	0	1	0	0	1	1	1	1	1	1		8
ARFIP2	1	0	0	0	0	1	0	1	0	1	0	1	1	1	0	1		8
MKL2	1	0	1	0	0	0	1	1	0	0	0	1	1	1	0	1		8
CACNA1D	1	0	1	0	0	0	1	1	0	0	0	0	1	1	1	1		8
HPN	0	0	1	0	0	0	1	1	0	0	0	1	1	1	1	1		8
ATP5G2	0	1	1	0	0	0	0	1	1	1	1	0	0	1	0	1		8
UGCG	0	0	0	0	0	0	0	1	0	1	1	1	1	1	1	1		8
GFRA1	0	0	1	0	0	0	1	1	0	0	0	1	0	1	1	1		7
LASS2	1	0	1	0	0	1	1	1	0	0	0	1	1	0	0	0		7
BTF3	0	0	0	0	0	0	1	1	0	0	1	0	1	1	1	1		7
RALGPS1	1	0	1	0	0	0	0	1	0	0	1	0	0	1	1	1		7
PDZK1	0	0	0	1	1	0	1	1	0	0	1	0	0	0	1	1		7
KIF5C	0	0	1	1	1	0	1	1	0	0	0	1	0	1	0	0		7
TCEAL4	0	0	0	0	0	1	1	1	0	0	0	1	0	1	1	1		7
PCTK2	1	0	0	0	0	1	0	1	0	0	1	1	0	1	0	1		7
GAMT	0	0	0	0	0	0	1	1	0	0	0	1	1	1	1	1		7
FBXL5	0	0	0	0	0	1	1	1	0	0	0	1	1	1	0	1		7
KIF13B	0	0	0	0	0	1	1	1	0	1	0	0	1	1	0	1		7
ENSA	1	0	1	0	0	1	0	1	1	0	0	1	0	0	1	0		7
FLNB	0	0	0	1	1	1	1	1	0	0	0	0	0	1	1	0		7
TSC22D3	1	0	1	0	0	1	0	0	0	1	1	1	0	0	0	1		7
LGALS8	1	0	0	0	0	1	0	1	0	1	0	1	0	0	1	1		7
HEXIM1	0	0	0	0	0	0	1	1	0	1	0	0	1	1	1	1		7
GLUL	0	0	1	0	0	0	1	1	0	1	0	1	0	1	1	0		7
TMBIM4	1	0	1	0	0	1	0	0	0	1	1	0	0	1	0	1		7
RABEP1	0	0	0	0	0	0	1	0	0	0	1	1	1	1	1	1		7
PFDN5	1	0	1	0	0	1	0	1	0	1	0	0	0	1	1	0		7
FRY	0	0	1	0	0	0	1	1	0	0	0	1	1	0	1	1		7
C10orf116	1	1	0	0	0	0	0	1	0	1	0	0	0	1	1	1		7
APBA2BP	0	0	1	0	0	0	1	1	0	0	0	1	0	1	1	1		7
SIAH2	1	0	1	0	0	0	1	1	0	0	0	1	1	0	1	0		7
FLJ20273	1	0	1	0	0	0	1	1	0	1	1	0	0	0	0	1		7
C1orf34	1	0	1	0	0	1	0	1	1	0	0	1	0	0	0	1		7
HHAT	0	0	1	0	0	0	1	1	0	0	0	1	1	1	0	1		7
GALNT6	1	1	1	0	0	0	0	1	0	1	1	0	0	0	0	1		7
LAMB2	0	0	1	0	0	1	1	1	0	0	0	0	1	0	1	1		7
CELSR2	1	1	1	0	0	0	0	1	0	0	0	1	0	1	1	0		7
TOB1	1	0	1	0	0	1	0	1	0	1	0	0	0	0	1	1		7
SCAMP1	1	0	1	0	0	1	0	0	0	0	1	1	0	1	0	1		7
SUOX	1	0	1	0	0	0	0	1	0	1	1	0	0	1	0	1		7
STC2	0	0	1	0	0	1	1	1	0	0	0	1	1	0	1	0		7
CACNA2D2	0	1	1	0	0	0	1	1	0	0	0	0	0	1	1	1		7
C14orf45	1	0	1	0	0	0	0	1	0	0	1	1	0	1	0	1		7
MED13L	0	1	1	0	0	0	0	1	0	0	1	0	0	1	1	1		7
GOLGB1	1	0	1	0	0	1	1	1	0	0	0	1	0	1	0	0		7
TCEB1P	0	0	0	0	0	0	1	1	1	1	0	1	1	0	0	1		7
SSH3	1	0	1	0	0	0	1	1	0	0	1	0	0	1	0	1		7
VAV3	0	0	1	0	0	1	1	1	0	1	1	0	0	1	0	0		7
FMO5	1	0	1	0	0	1	1	1	0	0	0	0	1	0	0	1		7
BBS4	0	0	1	0	0	0	1	1	0	0	1	1	0	1	0	1		7
PLXNB1	1	0	1	1	1	0	0	1	0	0	0	0	1	0	1	0		7
GOLSYN	0	0	1	0	0	0	0	1	1	1	1	0	0	1	0	1		7
NBEA	0	0	0	0	0	1	0	1	0	1	0	1	0	1	0	1		6
PTP4A2	0	0	0	0	0	0	0	1	0	1	0	0	1	1	1	1		6
RASA1	0	0	0	0	0	1	0	1	0	0	1	0	1	1	0	1		6
ITPR1	0	0	1	0	0	1	0	1	0	0	0	1	0	1	0	1		6
IKBKB	0	0	1	0	0	0	1	1	0	0	0	1	1	0	0	1		6
TFAP2A	1	0	1	0	0	1	0	0	1	0	0	1	0	0	0	1		6
CLSTN2	1	0	1	0	0	0	0	1	0	0	0	1	1	0	0	1		6
ANKRA2	0	0	1	0	0	1	1	1	0	0	0	0	0	1	0	1		6
EIF4B	1	0	1	0	0	1	0	1	0	1	0	0	0	0	1	0		6
FYCO1	1	0	1	0	0	1	0	1	0	1	0	0	0	0	0	1		6
PEX19	1	0	0	0	0	0	0	1	0	0	0	1	0	1	1	1		6
COL4A3BP	1	0	0	0	0	1	0	0	0	1	1	0	0	1	0	1		6
SYT17	1	0	1	0	0	0	0	1	0	1	1	0	0	1	0	0		6
C5orf5	0	1	0	0	0	0	1	1	0	0	0	1	0	1	0	1		6
SELENBP1	1	0	1	0	0	1	1	1	0	0	0	0	0	0	1	0		6
ATP6AP1	0	0	1	1	1	1	0	0	0	0	0	1	0	0	0	1		6
MUC1	0	0	1	0	0	0	1	1	0	1	0	0	0	1	1	0		6
IDUA	1	1	1	0	0	1	0	1	0	0	0	1	0	0	0	0		6
ADCY6	1	0	1	0	0	1	0	1	0	0	1	0	0	0	0	1		6
ARF3	1	0	1	0	0	0	0	1	0	0	1	0	0	1	0	1		6
KIAA0494	0	0	1	1	1	1	0	1	0	0	0	0	0	0	0	1		6
NUMA1	1	0	1	0	0	1	0	1	0	0	0	1	0	0	0	1		6
KIAA0556	1	0	1	0	0	1	0	1	0	0	1	0	0	0	0	1		6
ORAI3	0	0	0	0	0	0	1	1	0	1	1	0	0	1	0	1		6
TSPAN1	0	0	1	0	0	1	0	1	0	1	1	0	0	0	0	1		6
PCSK6	1	0	1	0	0	1	0	0	0	0	0	0	0	1	1	1		6
EFHC1	0	0	1	0	0	0	1	1	0	0	0	1	0	1	0	1		6
C4A	0	0	1	0	0	0	1	1	0	1	1	1	0	0	0	0		6
NBR1	0	0	0	0	0	1	1	1	0	0	0	0	1	1	0	1		6
RICS	1	1	0	0	0	0	0	1	1	1	1	0	0	0	0	0		6
RAB5B	1	1	0	0	0	0	0	0	0	1	1	0	0	1	0	1		6
ANKHD1	1	0	1	0	0	0	1	1	0	0	0	0	1	1	0	0		6
POLI	0	0	1	0	0	1	1	0	0	0	0	1	0	1	0	1		6
LLGL2	1	0	1	0	0	1	0	0	1	1	0	0	0	0	0	1		6
METRN	1	0	1	0	0	0	1	1	0	0	0	1	0	0	0	1		6
GALNAC4S-6ST	0	0	0	0	0	1	0	1	0	1	1	1	0	0	0	1		6
TOM1L1	1	0	0	0	0	1	0	1	1	1	0	0	0	0	0	1		6
TRIM3	1	1	0	0	0	0	0	0	0	1	1	0	0	1	0	1		6
SLC9A3R1	1	0	1	0	0	0	0	1	0	1	0	1	0	0	0	1		6
C9orf7	1	0	1	0	0	1	0	1	0	1	0	0	0	0	0	1		6
NEBL	1	0	1	0	0	0	0	1	1	0	1	0	0	0	1	0		6
MTUS1	1	0	1	0	0	0	1	1	0	1	0	0	0	1	0	0		6
PRR13	1	0	0	0	0	0	0	1	0	1	1	0	0	1	0	1		6
SEMA3C	1	1	0	0	0	0	0	1	0	1	1	0	0	0	0	1		6
TRAK1	1	0	0	0	0	1	1	1	0	0	0	0	0	1	0	1		6
PTGER3	0	0	1	0	0	0	1	1	0	0	0	1	0	0	1	1		6
FASN	1	0	1	0	0	0	0	0	0	1	1	1	0	0	0	1		6
SH3GLB2	1	1	0	0	0	0	0	1	0	0	1	0	1	1	0	0		6
SPG11	0	0	1	0	0	1	0	1	0	1	0	0	0	1	0	1		6
GATA2	1	0	0	0	0	1	0	0	0	1	1	1	0	0	0	0		5
TP53AP1	1	0	1	0	0	0	0	1	0	1	0	0	0	0	0	1		5
G6PC3	0	0	0	1	1	0	0	1	0	0	0	0	0	1	0	1		5
RBM5	0	0	1	0	0	1	0	0	0	0	0	1	0	0	1	1		5
MEGF9	0	0	0	0	0	0	0	1	0	1	0	1	0	0	1	1		5
TMEM30B	1	0	1	0	0	0	0	1	0	0	0	0	0	1	0	1		5
PNPLA4	0	0	0	0	0	0	1	1	0	0	0	0	1	1	0	1		5
VEZF1	0	0	0	0	0	0	0	1	0	1	0	0	0	1	1	1		5
CCNG2	1	0	1	0	0	1	0	1	0	0	0	1	0	0	0	0		5
CHAD	0	0	0	0	0	0	1	1	0	0	0	0	1	1	1	0		5
ATAD4	1	0	1	0	0	1	0	1	0	1	0	0	0	0	0	0		5
PLEKHF2	0	0	1	0	0	1	0	0	1	1	0	1	0	0	0	0		5
FUT8	0	0	0	0	0	0	0	1	0	1	1	0	0	1	0	1		5
EPS8L1	1	0	1	0	0	0	0	0	1	1	0	0	0	0	0	1		5
CTDSP1	1	0	1	0	0	1	0	1	0	0	0	0	0	0	0	1		5
UTP14C	1	0	0	1	1	1	0	1	0	0	0	0	0	0	0	0		5
KIAA0182	1	0	1	0	0	0	0	0	0	1	1	0	0	0	0	1		5
AHNAK	0	0	1	0	0	0	0	1	0	0	0	1	0	0	1	1		5
SPCS1	0	0	0	1	1	0	0	1	0	0	0	0	1	0	0	1		5
PHF15	0	0	0	1	1	0	0	1	0	0	0	0	1	0	0	1		5
SREBF1	1	0	0	0	0	0	0	1	0	1	0	1	0	0	0	1		5
USP52	1	1	1	0	0	1	1	0	0	0	0	0	0	0	0	0		5
PEX11A	1	0	1	0	0	0	0	1	0	1	0	0	0	0	0	1		5
DCXR	1	0	1	0	0	0	0	1	1	0	0	0	0	0	0	1		5
SULT1A1	1	0	1	0	0	0	0	1	0	0	1	0	0	1	0	0		5
RGL2	0	0	1	0	0	0	0	1	0	0	0	1	0	0	1	1		5
CAMK2N1	0	0	0	1	1	0	0	1	0	1	1	0	0	0	0	0		5
ALDH3B2	1	0	1	0	0	1	0	0	0	1	0	1	0	0	0	0		5
SALL2	0	0	1	0	0	0	0	1	0	0	0	1	0	1	1	0		5
CISH	1	0	1	1	1	0	0	1	0	0	0	0	0	0	0	0		5
C12orf10	0	0	0	0	0	0	0	1	0	1	1	0	0	1	0	1		5
SERHL2	1	0	1	0	0	0	0	0	0	1	0	1	0	0	0	1		5
SEMA3B	0	0	1	0	0	0	1	1	0	0	0	0	0	1	1	0		5
ALCAM	0	0	0	0	0	1	0	1	0	1	0	1	0	0	0	1		5
FAM102A	1	0	1	0	0	0	0	1	0	0	0	1	0	0	0	1		5
ABCA3	1	0	1	0	0	0	0	1	0	0	0	1	0	0	1	0		5
MAP3K12	0	0	1	0	0	0	0	0	0	0	0	1	0	1	1	1		5
RARA	1	0	1	0	0	0	0	1	0	0	0	0	0	1	0	1		5
IGFBP4	0	0	0	0	0	0	0	1	0	0	0	1	1	1	1	0		5
CYB561	1	0	1	0	0	0	0	0	0	1	0	1	0	0	0	1		5
GARNL1	1	0	1	0	0	0	0	1	0	0	0	0	0	1	0	1		5
KRT8	1	0	1	0	0	0	0	0	1	1	1	0	0	0	0	0		5
AGTR1	0	0	0	0	0	0	0	1	0	0	0	1	1	0	1	1		5
DCTN4	0	0	0	0	0	1	0	1	0	0	1	1	0	1	0	0		5
2008-03-02	1	0	1	0	0	1	0	0	0	0	0	1	0	0	0	1		5
FRAT1	1	0	0	0	0	1	0	1	0	0	0	0	0	1	0	1		5
ITGB5	0	0	0	1	1	0	0	0	0	1	1	0	0	0	0	1		5
COL4A5	0	0	1	0	0	0	0	1	0	1	0	1	0	0	0	1		5
AFF3	0	1	0	0	0	0	1	0	0	0	1	0	0	1	0	1		5
TCEAL1	0	0	0	0	0	1	0	1	0	0	0	0	0	1	1	1		5
HSD17B4	0	0	1	0	0	0	0	1	0	0	0	0	0	1	1	1		5
DMXL1	0	0	1	0	0	1	0	0	0	0	0	1	0	1	0	1		5
C11orf60	0	0	0	0	0	0	1	1	0	1	0	0	0	1	0	1		5
MZF1	0	0	1	0	0	1	0	1	0	0	0	0	0	1	1	0		5
PDCD4	1	0	1	0	0	0	0	1	0	0	0	0	1	0	1	0		5
COG2	0	0	1	0	0	0	0	1	0	0	0	0	1	0	1	1		5
CANT1	1	0	0	0	0	1	0	0	1	1	0	0	0	0	0	1		5
CD46	0	0	1	0	0	1	1	0	0	1	0	0	1	0	0	0		5
HNRPDL	0	0	1	0	0	0	0	1	0	1	0	0	0	1	0	1		5
MREG	1	0	1	0	0	0	0	1	0	1	0	1	0	0	0	0		5
ZNF446	0	0	1	0	0	1	1	0	0	0	0	1	0	1	0	0		5
PIGG	0	0	1	1	1	0	0	0	0	0	0	0	0	1	0	1		5
FAM134B	0	0	1	0	0	1	1	1	0	0	0	0	1	0	0	0		5
C4B	0	0	1	0	0	0	1	1	0	1	0	1	0	0	0	0		5
MST1	0	0	1	0	0	1	0	1	0	0	0	0	0	0	1	1		5
APBB2	0	0	0	0	0	1	1	1	0	0	0	1	0	0	0	1		5
PECI	0	0	0	0	0	0	0	1	0	1	1	1	0	0	0	1		5
KCTD3	1	0	1	0	0	0	0	1	1	0	0	1	0	0	0	0		5
PIP	0	0	1	0	0	0	0	1	0	1	0	1	0	0	0	1		5
NRIP1	0	0	1	0	0	0	0	1	0	1	0	1	0	0	1	0		5
NPEPPS	1	0	0	0	0	1	0	1	0	0	0	0	0	1	0	1		5
IRX5	1	0	1	0	0	0	0	0	0	0	0	1	0	0	1	1		5
FAM134C	0	0	1	0	0	1	0	1	0	0	0	1	0	0	0	1		5
SAP18	1	0	0	0	0	1	0	1	0	0	0	0	0	0	1	1		5
ANG	0	0	1	0	0	0	1	1	0	0	0	0	1	1	0	0		5
HIST2H2BE	1	0	1	0	0	1	0	0	0	0	0	1	0	0	0	1		5
ICA1	1	0	1	0	0	1	0	1	0	0	0	0	0	0	0	1		5
IGF1R	0	0	0	0	0	0	1	1	0	0	0	0	1	1	1	0		5
NEDD4L	0	0	0	0	0	1	1	1	0	0	0	0	0	1	1	0		5
MFAP3	0	0	0	1	1	1	0	1	0	0	0	0	0	0	0	1		5
PIB5PA	1	0	1	0	0	1	0	1	0	0	0	0	0	1	0	0		5
ACSL3	1	0	0	1	1	1	0	0	0	1	0	0	0	0	0	0		5
STK32B	0	0	0	0	0	0	1	1	0	0	0	1	0	1	0	1		5
IFT88	0	0	1	0	0	0	1	1	0	1	0	0	1	0	0	0		5
BECN1	0	0	0	0	0	1	0	1	0	0	0	0	1	0	1	1		5
C6orf97	1	0	1	0	0	0	1	1	0	0	1	0	0	0	0	0		5
FLOT1	0	0	0	0	0	1	1	1	0	0	0	1	0	0	0	1		5
ARPP-19	1	0	0	1	1	0	0	1	0	0	0	0	0	0	0	1		5
ZNF688	1	0	1	0	0	0	0	1	0	0	0	0	0	1	0	1		5
CRIP1	0	0	1	0	0	0	0	1	0	1	0	1	0	0	0	1		5
LETMD1	0	1	1	0	0	1	0	1	0	0	0	0	0	1	0	0		5
SFRS12	0	0	1	0	0	0	0	0	0	0	0	1	0	1	1	1		5
FBXL7	0	0	1	0	0	0	0	1	0	0	1	1	0	0	0	1		5
LRRC48	0	0	0	0	0	0	1	1	0	0	0	1	0	0	1	1		5
CSNK1D	1	0	0	1	1	0	0	1	0	0	0	0	0	0	0	1		5
SYTL2	0	1	0	0	0	1	0	0	0	0	1	0	0	1	0	1		5
WDR19	0	0	0	0	0	0	1	1	0	0	0	1	0	1	0	1		5
SPATA20	0	0	0	0	0	0	0	1	0	1	1	0	0	1	0	1		5
ZMYND10	0	0	0	0	0	0	1	1	0	0	0	1	0	1	0	1		5
PRLR	1	0	1	0	0	0	0	0	1	0	0	1	0	1	0	0		5
C4orf18	0	1	1	0	0	0	0	1	0	0	0	1	0	1	0	0		5
SETBP1	0	0	1	0	0	0	1	1	0	0	0	1	0	0	1	0		5
OS9	1	0	0	0	0	1	0	1	0	0	0	1	0	1	0	0		5
BLVRA	0	1	0	0	0	0	0	1	0	1	0	1	0	0	0	1		5
PATZ1	1	0	1	0	0	1	0	1	0	0	0	1	0	0	0	0		5
SLC2A10	1	0	1	0	0	0	0	0	0	1	0	1	0	0	0	1		5
C1orf21	0	0	0	0	0	0	1	1	0	0	0	0	0	1	1	0		4
TMEM62	0	0	1	0	0	0	0	1	0	1	0	0	0	0	0	1		4
RNF187	1	0	1	0	0	0	0	0	1	0	0	1	0	0	0	0		4
TncRNA	0	0	1	0	0	0	1	0	0	0	1	1	0	0	0	0		4
MYO6	1	0	1	0	0	1	0	0	1	0	0	0	0	0	0	0		4
FLJ21062	0	0	1	0	0	0	1	1	0	0	0	0	1	0	0	0		4
C16orf45	0	0	0	0	0	0	0	1	0	1	0	0	0	1	0	1		4
NDFIP1	0	0	0	0	0	0	0	1	0	1	0	1	0	1	0	0		4
SIGIRR	0	0	1	0	0	1	0	1	0	0	0	0	0	0	0	1		4
DHRS12	1	0	0	0	0	1	0	1	0	0	0	0	0	0	0	1		4
RMND5B	1	0	1	0	0	0	0	1	0	0	0	0	0	0	0	1		4
RHOT2	1	0	1	0	0	0	0	1	0	0	0	1	0	0	0	0		4
SLC39A9	1	1	0	0	0	0	0	0	0	0	1	0	0	1	0	0		4
MID2	1	0	0	0	0	1	0	0	0	0	0	1	0	0	0	1		4
FAM134A	0	0	0	0	0	1	0	1	0	0	0	1	0	0	0	1		4
PER2	1	0	1	0	0	0	0	0	0	0	0	0	0	1	1	0		4
CYB561D2	0	0	0	1	1	0	0	1	0	0	0	0	0	0	0	1		4
CYP2B6	0	0	0	0	0	0	1	1	0	0	0	0	1	1	0	0		4
PLAT	0	0	0	0	0	0	0	1	0	0	0	0	0	1	1	1		4
UBE3B	0	0	0	0	0	0	0	1	0	0	0	0	0	1	1	1		4
TOX3	1	0	1	0	0	0	0	0	1	1	0	0	0	0	0	0		4
RPL41	1	0	0	0	0	0	0	1	0	0	1	0	0	0	1	0		4
CTSF	0	0	0	0	0	0	0	1	0	0	0	1	0	1	0	1		4
FER1L3	0	0	0	0	0	0	0	1	0	0	1	0	0	1	1	0		4
TTC3	1	0	1	0	0	1	0	0	0	0	0	1	0	0	0	0		4
SMARCE1	1	0	0	0	0	1	0	0	0	0	0	1	0	0	0	1		4
GSTM3	0	0	0	0	0	1	0	1	0	0	0	1	0	0	0	1		4
CD164	1	0	1	0	0	1	0	0	0	1	0	0	0	0	0	0		4
C1orf149	0	0	1	0	0	1	0	1	0	0	0	1	0	0	0	0		4
IFT122	0	0	1	0	0	1	0	0	0	0	1	1	0	0	0	0		4
MTL5	0	0	1	0	0	0	0	1	0	0	0	1	0	0	0	1		4
ADD1	0	0	0	0	0	0	0	1	0	0	0	1	0	0	1	1		4
VAMP2	0	0	1	0	0	0	1	0	0	0	0	1	0	0	1	0		4
DYNC2LI1	0	0	1	0	0	0	0	1	0	0	0	0	0	0	1	1		4
PPP1R3C	0	0	0	0	0	1	0	1	0	0	0	0	1	0	1	0		4
SMA5	0	0	1	0	0	0	0	0	0	1	0	1	0	0	0	1		4
ERBB2	1	0	1	0	0	1	0	0	0	1	0	0	0	0	0	0		4
TMEM112	1	0	1	0	0	0	0	1	0	0	0	0	0	0	0	1		4
SLC2A3P1	0	0	0	0	0	0	1	0	0	0	1	0	0	1	0	1		4
CHRD	0	0	1	0	0	0	0	1	0	0	0	1	0	1	0	0		4
PIGT	0	0	0	0	0	0	1	1	0	0	0	0	1	1	0	0		4
NUDT4	1	0	0	0	0	0	0	0	0	1	1	0	0	0	0	1		4
IQCK	0	0	1	0	0	0	1	1	0	0	0	1	0	0	0	0		4
GPER	0	1	0	0	0	1	0	0	0	0	1	0	0	1	0	0		4
KIAA0913	0	1	1	0	0	1	0	0	0	0	0	1	0	0	0	0		4
ATP7B	1	0	0	1	1	0	0	1	0	0	0	0	0	0	0	0		4
PNPO	1	0	0	0	0	1	0	1	0	0	0	0	0	0	0	1		4
LTBP3	0	0	1	0	0	1	1	0	0	0	0	1	0	0	0	0		4
EPB41L4A	1	0	0	0	0	0	0	0	0	0	1	0	0	1	0	1		4
TM9SF1	1	0	0	0	0	0	0	1	0	0	0	1	0	0	0	1		4
CRNKL1	1	0	0	0	0	1	0	1	0	1	0	0	0	0	0	0		4
LZTFL1	0	0	0	0	0	0	1	1	0	0	0	0	1	1	0	0		4
H1FX	1	0	1	0	0	0	0	1	0	0	0	1	0	0	0	0		4
SGSM2	0	0	1	0	0	1	0	0	0	0	0	1	0	0	1	0		4
ARL1	1	0	0	1	1	0	0	1	0	0	0	0	0	0	0	0		4
HIST1H2AC	0	0	0	0	0	1	0	0	0	0	0	1	0	0	1	1		4
C14orf112	0	0	0	0	0	0	0	1	0	1	0	0	0	1	0	1		4
HMGCL	0	0	0	0	0	1	1	1	0	0	0	0	0	0	0	1		4
AP1M2	1	0	0	0	0	1	0	1	0	0	0	0	0	0	0	1		4
LPPR2	0	0	0	0	0	1	0	1	0	0	0	1	0	1	0	0		4
FBXW4	1	0	1	0	0	0	0	1	0	0	0	0	0	1	0	0		4
ABLIM3	0	0	0	0	0	0	0	1	0	0	1	1	0	1	0	0		4
WDR52	0	0	1	1	1	0	1	0	0	0	0	0	0	0	0	0		4
RNF43	1	0	0	0	0	1	0	0	0	1	0	0	0	0	0	1		4
RET	1	0	1	0	0	0	0	1	0	0	0	1	0	0	0	0		4
DDX17	1	0	1	0	0	1	0	0	0	0	0	1	0	0	0	0		4
TMEM135	1	0	0	0	0	1	0	0	0	1	0	0	0	0	0	1		4
ZNF24	1	0	0	0	0	0	0	1	0	0	0	1	0	0	0	1		4
KRT19	1	0	1	0	0	0	0	0	0	0	0	1	0	0	0	1		4
RAI2	0	0	1	0	0	0	1	1	0	0	0	0	1	0	0	0		4
TUSC4	0	0	0	0	0	0	1	1	0	0	0	0	0	1	0	1		4
HIST1H2BD	1	0	0	0	0	1	0	0	0	0	0	1	0	0	0	1		4
KLHDC2	1	0	0	0	0	0	0	1	0	0	1	0	0	1	0	0		4
TMEM9B	0	0	0	0	0	1	0	1	0	0	0	0	1	0	0	1		4
CRABP2	1	0	1	0	0	1	0	0	0	0	0	1	0	0	0	0		4
ST6GALNAC2	0	0	1	0	0	0	0	1	0	0	0	1	0	0	0	1		4
CLK4	0	0	1	0	0	1	0	0	0	0	0	1	0	1	0	0		4
RBM35B	1	0	1	0	0	1	0	0	1	0	0	0	0	0	0	0		4
GTF2I	1	0	1	0	0	0	0	0	0	0	0	1	0	0	1	0		4
76P	0	1	1	0	0	0	0	1	0	0	0	0	0	0	1	0		4
RHBDF1	1	0	1	0	0	1	0	1	0	0	0	0	0	0	0	0		4
TRPS1	1	0	1	0	0	1	0	0	0	0	0	1	0	0	0	0		4
JARID1B	1	0	1	0	0	1	0	0	0	0	0	1	0	0	0	0		4
FXYD3	1	0	1	0	0	1	0	1	0	0	0	0	0	0	0	0		4
CIB1	0	0	1	0	0	1	0	1	0	1	0	0	0	0	0	0		4
ELOVL2	0	0	1	0	0	0	0	1	0	0	0	1	0	0	1	0		4
KIAA0644	1	0	1	0	0	0	0	0	0	1	0	1	0	0	0	0		4
CXorf40A	1	0	0	0	0	1	0	0	0	1	0	1	0	0	0	0		4
CD63	0	0	0	1	1	0	0	0	0	1	0	0	0	0	0	1		4
DUSP4	0	0	0	0	0	0	0	1	0	1	1	0	0	1	0	0		4
VPS37C	1	0	0	0	0	0	0	1	0	1	0	0	0	0	0	1		4
PTPRT	0	0	0	0	0	0	0	1	0	0	1	0	0	1	1	0		4
LRRFIP1	0	0	1	0	0	1	0	0	0	1	1	0	0	0	0	0		4
PVRL2	1	0	1	0	0	0	0	1	0	0	0	0	0	0	1	0		4
APOD	0	0	1	0	0	1	0	0	0	1	0	1	0	0	0	0		4
COG7	1	0	1	0	0	0	0	0	0	0	0	1	0	1	0	0		4
ADCY9	0	0	0	0	0	0	0	1	0	0	0	0	1	1	1	0		4
AGGF1	1	0	0	0	0	0	0	0	0	1	0	0	0	1	0	1		4
RTN2	1	0	0	0	0	0	0	1	0	0	0	1	0	0	1	0		4
ZHX2	1	0	1	0	0	1	0	0	0	0	0	1	0	0	0	0		4
HIST2H2AA3	1	0	1	0	0	1	0	0	0	0	0	1	0	0	0	0		4
NINJ1	1	0	1	0	0	0	0	1	0	0	0	1	0	0	0	0		4
WDR55	1	0	0	0	0	0	0	1	0	1	0	0	0	0	0	1		4
PHF20	1	0	0	0	0	1	0	1	0	1	0	0	0	0	0	0		4
RPL15	1	0	0	0	0	1	0	1	0	0	0	0	0	0	0	1		4
SYNC1	0	0	0	0	0	0	1	1	0	1	0	0	0	0	0	1		4
BLVRB	1	0	0	0	0	0	0	1	0	1	0	0	0	0	0	1		4
LOC92482	1	0	0	0	0	1	0	1	0	0	0	0	0	0	0	1		4
CROT	0	0	1	0	0	0	0	0	0	1	1	0	0	0	0	1		4
AFF1	0	1	1	0	0	0	0	0	0	1	1	0	0	0	0	0		4
SERPINB6	0	0	0	0	0	0	0	0	0	1	1	0	0	1	0	1		4
SNX1	0	0	1	0	0	0	0	1	0	0	0	0	0	0	1	1		4
CTNNA1	0	0	0	0	0	0	0	1	0	1	0	0	0	0	1	1		4
TBX3	0	0	1	0	0	0	0	1	0	0	0	0	0	1	0	1		4
RABEP2	1	0	1	0	0	0	0	0	0	1	0	0	0	0	0	1		4
TCEA2	0	0	0	0	0	1	0	0	0	0	0	1	0	1	0	1		4
FAM110B	0	1	0	0	0	1	0	0	0	0	1	1	0	0	0	0		4
NAIP	0	0	1	0	0	0	0	0	0	0	1	1	0	1	0	0		4
TM7SF2	1	0	0	0	0	1	0	0	0	1	0	0	0	0	0	1		4
GLI3	0	0	1	0	0	0	0	1	0	0	0	1	0	1	0	0		4
TPSAB1	0	0	1	0	0	0	0	1	0	0	0	1	0	0	0	1		4
SLC22A18	0	0	1	0	0	0	1	1	0	0	0	0	0	0	0	1		4
NEK9	0	0	1	0	0	0	0	1	0	0	1	0	0	0	0	1		4
C5orf30	0	0	0	0	0	0	0	1	0	0	0	0	0	1	1	1		4
MYLIP	1	0	0	0	0	1	0	0	0	0	1	0	0	0	0	1		4
CLU	1	0	1	0	0	1	0	0	0	0	0	1	0	0	0	0		4
ANGEL2	0	0	1	0	0	0	0	1	0	0	0	1	1	0	0	0		4
P2RX4	1	0	1	0	0	0	0	1	0	0	0	0	0	0	0	1		4
TSPAN31	1	0	0	0	0	1	0	1	0	1	0	0	0	0	0	0		4
SPTLC2	1	0	0	0	0	0	0	1	0	1	0	0	0	0	0	1		4
SLC24A1	1	0	0	0	0	1	0	1	0	0	0	0	0	1	0	0		4
SERPINA3	0	0	1	0	0	0	0	1	0	0	0	1	0	0	1	0		4
ARFIP1	1	0	0	0	0	0	0	1	0	1	0	0	0	0	0	1		4
DHRS7	0	0	1	0	0	1	0	1	0	0	0	0	0	0	0	1		4
SLC16A6	1	0	0	0	0	0	0	1	0	0	0	0	0	1	0	1		4
SERTAD3	1	0	0	0	0	0	1	0	0	0	0	1	0	0	0	1		4
PIAS3	1	0	0	0	0	0	0	0	0	0	0	1	0	0	1	1		4
SMA4	1	0	1	0	0	0	0	0	0	1	0	1	0	0	0	0		4
PREPL	0	0	1	0	0	1	0	1	0	0	0	0	0	0	1	0		4
AKR7A3	0	0	1	0	0	0	0	1	0	1	0	0	0	0	0	1		4
NDUFA2	1	0	0	0	0	0	0	1	0	1	0	0	0	0	0	1		4
AZGP1	0	0	1	0	0	0	0	1	0	0	0	1	0	0	0	1		4
C20orf23	1	0	1	0	0	0	0	0	0	1	0	0	0	0	0	1		4
SERPINA5	0	0	0	0	0	0	0	1	0	0	0	1	0	0	1	1		4
DNAJC16	0	0	0	0	0	1	1	1	0	0	0	0	1	0	0	0		4
POLD4	0	0	0	0	0	1	0	1	0	0	1	0	0	0	0	1		4
XPC	0	0	0	1	1	0	0	1	0	0	0	0	0	0	1	0		4
RPL29	1	0	0	0	0	1	0	1	0	0	0	0	0	0	0	0		3
INADL	0	0	1	0	0	1	0	0	0	0	0	0	0	1	0	0		3
TMC5	0	0	0	0	0	0	0	1	0	1	0	0	0	1	0	0		3
PNPLA2	1	0	0	0	0	1	1	0	0	0	0	0	0	0	0	0		3
CXorf40B	1	0	0	0	0	1	0	0	0	0	0	0	0	0	1	0		3
NPY1R	0	0	0	0	0	0	0	1	0	0	0	1	0	1	0	0		3
GSTZ1	0	0	0	0	0	1	0	1	0	0	0	0	0	0	0	1		3
AKAP9	1	0	1	0	0	1	0	0	0	0	0	0	0	0	0	0		3
CXXC5	0	1	0	0	0	0	0	0	0	0	1	0	0	1	0	0		3
2008-03-02	1	0	0	0	0	1	0	0	0	0	0	1	0	0	0	0		3
AP1G2	0	0	0	0	0	0	0	0	0	1	1	0	0	0	0	1		3
SYCP2	1	0	1	0	0	0	0	0	0	0	0	1	0	0	0	0		3
AHCYL1	0	0	0	0	0	0	1	1	0	0	0	0	0	0	1	0		3
STARD10	0	1	0	0	0	0	0	0	0	0	1	0	0	1	0	0		3
GPRC5C	1	0	0	0	0	0	0	0	0	1	0	0	0	0	0	1		3
COPZ1	0	0	0	0	0	0	0	1	0	1	0	0	0	0	0	1		3
LOC143381	0	1	0	0	0	0	0	0	0	0	1	0	0	1	0	0		3
TRIM8	0	1	0	0	0	0	0	1	0	0	0	1	0	0	0	0		3
SH3YL1	1	0	1	0	0	1	0	0	0	0	0	0	0	0	0	0		3
DENND2D	1	0	1	0	0	1	0	0	0	0	0	0	0	0	0	0		3
ACBD4	0	0	1	0	0	0	1	1	0	0	0	0	0	0	0	0		3
INPP4B	0	0	0	0	0	0	0	0	0	1	1	0	0	0	0	1		3
HES1	1	0	1	0	0	1	0	0	0	0	0	0	0	0	0	0		3
RND1	1	0	1	0	0	0	0	0	0	0	0	0	0	0	0	1		3
PGRMC2	1	0	0	0	0	0	0	1	0	0	0	1	0	0	0	0		3
PIK3IP1	1	0	1	0	0	1	0	0	0	0	0	0	0	0	0	0		3
CTDSPL	0	0	0	0	0	0	0	1	0	0	0	0	1	0	1	0		3
GGPS1	1	0	1	0	0	0	0	0	0	0	0	1	0	0	0	0		3
SEC16A	1	0	1	0	0	0	0	0	0	1	0	0	0	0	0	0		3
HN1L	1	0	0	0	0	0	0	1	1	0	0	0	0	0	0	0		3
MVP	0	0	0	0	0	1	0	0	0	1	1	0	0	0	0	0		3
ATP2C2	1	0	1	0	0	1	0	0	0	0	0	0	0	0	0	0		3
MXD4	1	0	0	0	0	1	0	1	0	0	0	0	0	0	0	0		3
C19orf21	1	0	0	0	0	1	0	1	0	0	0	0	0	0	0	0		3
SCCPDH	0	0	0	0	0	0	1	1	0	0	0	0	0	0	0	1		3
HBP1	0	0	1	0	0	0	0	1	0	0	0	1	0	0	0	0		3
ANK3	1	0	1	0	0	1	0	0	0	0	0	0	0	0	0	0		3
C17orf28	0	1	0	0	0	0	0	0	0	0	1	0	0	1	0	0		3
CRIP2	1	0	1	0	0	0	0	0	0	0	0	1	0	0	0	0		3
CCND1	0	0	0	0	0	0	0	1	0	0	0	0	0	0	1	1		3
GLRB	0	0	0	0	0	0	0	1	0	0	0	1	0	0	1	0		3
RNF14	0	0	0	0	0	0	0	1	0	0	0	1	0	0	1	0		3
YIPF1	0	0	0	0	0	1	0	0	0	1	0	1	0	0	0	0		3
GAA	1	0	0	0	0	1	0	0	0	0	0	1	0	0	0	0		3
PCM1	0	0	0	0	0	0	1	0	0	0	0	0	1	1	0	0		3
STUB1	1	0	0	0	0	0	0	1	0	0	0	0	0	0	0	1		3
PSD4	1	0	1	0	0	1	0	0	0	0	0	0	0	0	0	0		3
SMUG1	1	0	0	0	0	0	0	0	0	1	0	1	0	0	0	0		3
ZNF592	1	0	0	1	1	0	0	0	0	0	0	0	0	0	0	0		3
S100A14	0	0	1	0	0	1	0	0	0	1	0	0	0	0	0	0		3
HMG20B	1	0	0	0	0	0	0	1	0	0	0	1	0	0	0	0		3
SCGB2A2	0	0	1	0	0	0	0	0	0	1	0	1	0	0	0	0		3
IFT140	0	0	0	0	0	0	0	1	0	0	0	0	0	1	0	1		3
VPS45	1	0	1	0	0	0	0	0	0	0	0	1	0	0	0	0		3
PTOV1	1	0	1	0	0	0	0	0	0	0	0	1	0	0	0	0		3
NME4	0	0	1	0	0	0	0	1	0	0	0	1	0	0	0	0		3
SSBP2	0	0	1	0	0	1	0	0	0	0	0	1	0	0	0	0		3
ZER1	1	0	0	1	1	0	0	0	0	0	0	0	0	0	0	0		3
ZCCHC10	0	0	0	0	0	0	0	1	0	0	0	0	0	1	0	1		3
PMVK	1	0	0	0	0	0	0	1	0	0	0	1	0	0	0	0		3
HPX	0	0	1	0	0	0	0	0	0	0	1	1	0	0	0	0		3
GOLPH3L	1	0	1	0	0	1	0	0	0	0	0	0	0	0	0	0		3
MANBA	1	0	1	0	0	1	0	0	0	0	0	0	0	0	0	0		3
RPL3	1	0	0	0	0	0	0	1	0	0	0	0	0	0	1	0		3
SYNJ2BP	1	0	0	0	0	1	0	0	0	0	0	0	0	0	0	1		3
ABCG1	1	0	1	0	0	1	0	0	0	0	0	0	0	0	0	0		3
PRUNE	1	0	1	0	0	0	0	0	0	0	0	1	0	0	0	0		3
RBKS	0	0	0	0	0	1	1	1	0	0	0	0	0	0	0	0		3
PRR5	1	0	1	0	0	1	0	0	0	0	0	0	0	0	0	0		3
DAK	0	0	1	0	0	0	0	1	0	0	0	0	0	0	0	1		3
CCDC56	0	0	0	0	0	0	0	1	0	0	0	0	1	0	0	1		3
PDK2	1	0	0	0	0	0	0	1	0	0	0	0	0	1	0	0		3
ABCD3	0	0	0	0	0	0	1	1	0	0	0	0	0	0	1	0		3
THBS1	0	0	1	0	0	0	1	1	0	0	0	0	0	0	0	0		3
SULT1A2	1	0	1	0	0	0	0	0	0	0	1	0	0	0	0	0		3
SCP2	0	0	0	0	0	1	0	1	0	1	0	0	0	0	0	0		3
BIK	1	0	1	0	0	1	0	0	0	0	0	0	0	0	0	0		3
C20orf12	0	0	1	0	0	0	1	0	0	0	0	1	0	0	0	0		3
LASS4	0	0	1	0	0	0	0	1	0	0	0	1	0	0	0	0		3
NCOA1	0	0	1	0	0	1	0	0	0	0	0	1	0	0	0	0		3
TPSB2	0	0	1	0	0	0	0	1	0	0	0	1	0	0	0	0		3
PRR15	0	1	0	0	0	0	0	0	0	0	1	0	0	1	0	0		3
PRKAR1A	1	0	0	0	0	1	0	0	0	0	0	0	0	0	0	1		3
SULT2B1	1	0	0	0	0	0	0	0	0	1	0	0	0	0	0	1		3
SYNGR2	1	0	0	0	0	1	0	0	0	1	0	0	0	0	0	0		3
R3HDM2	1	0	1	0	0	1	0	0	0	0	0	0	0	0	0	0		3
NQO1	0	0	0	0	0	1	0	0	0	1	0	0	0	0	0	1		3
KIAA0984	1	0	1	0	0	0	0	0	0	0	0	0	0	0	0	1		3
TMEM59	0	0	1	0	0	1	0	1	0	0	0	0	0	0	0	0		3
RCOR3	0	0	1	0	0	0	0	0	0	0	0	1	0	1	0	0		3
KIAA0485	0	0	1	0	0	0	0	0	0	1	1	0	0	0	0	0		3
ZMYND11	1	0	0	0	0	1	0	0	0	0	0	1	0	0	0	0		3
PIP4K2C	1	0	0	0	0	0	0	0	0	1	0	0	0	0	0	1		3
SNX24	0	0	0	1	1	0	0	0	0	0	0	1	0	0	0	0		3
PPP2CA	0	0	0	0	0	0	0	1	0	0	0	0	0	0	1	1		3
COQ7	1	0	0	0	0	0	0	1	0	0	0	0	0	0	0	1		3
PIGV	0	0	0	0	0	1	0	1	0	0	0	0	0	0	0	1		3
SNED1	0	0	1	0	0	0	0	0	0	0	1	1	0	0	0	0		3
RAB14	1	0	0	0	0	1	0	0	0	0	0	0	0	0	0	1		3
EGR3	0	0	1	0	0	0	0	0	0	0	0	0	0	1	1	0		3
KIAA0319L	0	0	0	0	0	1	0	1	0	0	0	0	0	1	0	0		3
CADPS2	0	0	0	0	0	0	0	0	0	1	0	1	0	0	0	1		3
ZNF703	0	1	0	0	0	0	0	0	0	0	1	0	0	1	0	0		3
CHMP2A	0	0	0	0	0	0	1	1	0	0	0	0	0	0	0	1		3
CTNND2	1	0	0	0	0	1	0	0	0	0	0	1	0	0	0	0		3
CCPG1	0	0	0	0	0	0	0	1	0	0	0	1	0	1	0	0		3
IRS1	0	0	0	0	0	0	0	1	0	0	0	0	0	0	1	1		3
C1orf78	0	0	1	0	0	0	0	1	0	0	0	1	0	0	0	0		3
C1orf64	0	1	0	0	0	0	0	0	0	0	1	0	0	1	0	0		3
PKP4	1	0	1	0	0	1	0	0	0	0	0	0	0	0	0	0		3
TSC2	0	0	1	0	0	0	0	0	0	0	0	1	0	0	1	0		3
LRP10	0	0	0	0	0	0	0	1	0	0	1	0	0	1	0	0		3
WDR42A	1	0	1	0	0	0	0	0	0	0	0	0	0	0	1	0		3
RETSAT	0	0	0	0	0	1	0	0	0	1	0	0	0	0	0	1		3
RPL22	1	0	0	0	0	1	0	1	0	0	0	0	0	0	0	0		3
SCYL3	1	0	1	0	0	0	0	0	0	0	0	1	0	0	0	0		3
OVOL2	0	0	1	0	0	0	1	0	1	0	0	0	0	0	0	0		3
NCOA2	1	0	1	0	0	1	0	0	0	0	0	0	0	0	0	0		3
DUSP5	0	0	0	1	1	0	0	0	0	1	0	0	0	0	0	0		3
MSX2	1	0	0	0	0	0	0	1	0	1	0	0	0	0	0	0		3
GALNT10	0	0	0	0	0	0	0	0	0	1	1	0	0	1	0	0		3
C14orf79	0	0	0	0	0	0	1	1	0	0	0	0	0	0	1	0		3
PCBP2	1	1	0	0	0	0	0	0	0	0	0	0	0	1	0	0		3
PIGH	0	0	0	0	0	0	0	1	0	0	0	0	0	1	0	1		3
RBPMS	1	0	1	0	0	1	0	0	0	0	0	0	0	0	0	0		3
FLJ13611	1	0	0	0	0	0	0	1	0	0	0	0	0	0	0	1		3
LONP2	0	0	1	0	0	0	0	0	0	0	0	1	0	0	0	1		3
CPE	0	0	0	0	0	0	0	0	0	1	0	1	0	0	0	1		3
TTC8	0	1	0	0	0	0	0	0	0	0	1	0	0	1	0	0		3
GCC2	1	0	1	0	0	1	0	0	0	0	0	0	0	0	0	0		3
TECT1	0	0	0	0	0	0	0	1	0	0	0	0	0	1	0	1		3
PPFIBP2	1	0	1	0	0	1	0	0	0	0	0	0	0	0	0	0		3
BRD8	0	0	0	0	0	0	0	1	0	0	0	0	0	1	1	0		3
CORO1B	1	0	0	0	0	1	0	0	0	0	0	0	0	0	0	1		3
BAI2	0	0	0	0	0	0	0	1	0	0	0	0	0	1	1	0		3
DNAH5	0	1	0	0	0	0	0	0	0	0	1	0	0	1	0	0		3
SECISBP2	0	0	1	0	0	1	0	1	0	0	0	0	0	0	0	0		3
SETDB1	1	0	1	0	0	1	0	0	0	0	0	0	0	0	0	0		3
C16orf24	1	0	0	0	0	0	1	1	0	0	0	0	0	0	0	0		3
DOCK1	0	0	0	0	0	0	1	1	0	0	0	0	0	1	0	0		3
MGST2	0	0	0	0	0	0	0	1	0	1	0	0	0	0	0	1		3
SURF1	1	0	0	0	0	0	0	1	0	1	0	0	0	0	0	0		3
GOLGA1	0	0	0	1	1	0	0	0	0	0	0	0	0	0	0	1		3
TRAPPC6A	1	0	1	0	0	0	0	1	0	0	0	0	0	0	0	0		3
MEIS3P1	0	0	0	0	0	0	1	1	0	0	0	1	0	0	0	0		3
TPD52	1	0	1	0	0	0	0	0	1	0	0	0	0	0	0	0		3
CACNB3	1	0	1	0	0	1	0	0	0	0	0	0	0	0	0	0		3
CNNM3	1	0	0	0	0	0	0	1	0	0	0	0	0	0	0	1		3
ATP2A3	1	0	1	0	0	1	0	0	0	0	0	0	0	0	0	0		3
DNMBP	0	0	0	0	0	0	0	1	0	0	0	0	0	1	0	1		3
CPT1B	0	0	1	0	0	0	0	0	0	0	0	1	0	0	1	0		3
SCGB1D2	0	0	1	0	0	0	0	0	0	1	0	1	0	0	0	0		3
MKNK2	0	0	1	0	0	0	1	1	0	0	0	0	0	0	0	0		3
PURA	0	0	0	0	0	0	0	1	0	0	0	0	0	1	0	1		3
KIAA1370	0	1	0	0	0	0	0	0	0	0	1	0	0	1	0	0		3
CPD	1	0	0	0	0	0	0	1	0	1	0	0	0	0	0	0		3
LOC92497	0	1	0	0	0	0	0	0	0	0	1	0	0	1	0	0		3
EML2	0	0	0	0	0	1	1	1	0	0	0	0	0	0	0	0		3
KIAA1219	0	0	1	0	0	0	0	1	0	0	0	0	0	0	0	1		3
DCI	1	0	0	0	0	0	0	1	0	0	0	0	0	0	1	0		3
MSTP9	0	0	1	0	0	1	0	0	0	0	0	0	0	0	0	1		3
TMEM157	0	1	0	0	0	0	0	0	0	0	1	0	0	1	0	0		3
XPA	0	0	0	0	0	0	1	1	0	0	0	0	0	1	0	0		3
RAB11A	1	0	0	0	0	0	0	1	0	0	0	0	0	0	1	0		3
IGSF3	1	0	0	0	0	1	0	0	0	0	0	1	0	0	0	0		3
ARHGAP8	1	0	1	0	0	1	0	0	0	0	0	0	0	0	0	0		3
ASTN2	0	0	0	0	0	0	0	1	0	0	0	1	0	0	0	1		3
CCDC106	0	0	0	0	0	0	0	1	0	0	0	1	0	0	0	1		3
ADAR	1	0	1	0	0	0	0	0	0	0	0	1	0	0	0	0		3
RAD17	0	0	0	0	0	0	0	1	0	0	0	0	0	1	0	1		3
TSPAN15	1	0	1	0	0	0	0	0	0	1	0	0	0	0	0	0		3
ARFGEF1	1	0	1	0	0	1	0	0	0	0	0	0	0	0	0	0		3
SMARCC2	0	0	1	0	0	0	0	1	0	0	0	0	0	1	0	0		3
LIMA1	0	0	0	0	0	1	0	0	0	1	1	0	0	0	0	0		3
HGD	1	1	0	0	0	0	0	0	0	0	1	0	0	0	0	0		3
KIAA1598	1	0	1	0	0	1	0	0	0	0	0	0	0	0	0	0		3
SORL1	0	0	1	0	0	0	0	1	0	1	0	0	0	0	0	0		3
RALGPS2	0	0	1	0	0	0	0	0	0	0	1	0	0	1	0	0		3
FDXR	1	0	0	0	0	0	0	1	0	0	0	0	0	0	0	1		3
GHR	0	0	1	0	0	1	0	0	0	0	0	0	0	0	0	1		3
C4orf16	1	0	0	0	0	0	0	1	0	0	0	0	0	0	0	1		3
PEX1	1	0	0	0	0	1	0	0	0	0	0	0	0	0	0	1		3
EAPP	1	0	0	0	0	0	0	1	0	0	0	0	0	0	0	1		3
RERE	0	0	1	0	0	0	1	0	0	1	0	0	0	0	0	0		3
PIK3R3	0	0	1	0	0	1	0	0	0	0	0	1	0	0	0	0		3
FLJ30092	0	0	1	0	0	0	0	0	0	0	1	0	0	0	0	1		3
UBR1	0	1	0	0	0	0	0	0	0	0	1	0	0	1	0	0		3
GPC1	1	0	1	0	0	0	0	0	0	1	0	0	0	0	0	0		3
AMT	0	1	1	0	0	0	0	0	0	0	0	0	0	0	1	0		3
TTC6	0	1	0	0	0	0	0	0	0	0	1	0	0	1	0	0		3
TPT1	1	0	1	0	0	1	0	0	0	0	0	0	0	0	0	0		3
ELMO3	1	0	1	0	0	1	0	0	0	0	0	0	0	0	0	0		3
PNN	1	0	1	0	0	0	0	1	0	0	0	0	0	0	0	0		3
ABCC8	0	0	0	0	0	0	0	1	0	0	0	0	0	1	1	0		3
GDF15	0	0	0	0	0	0	0	1	0	1	0	0	0	0	0	1		3
SEC14L2	0	0	0	0	0	0	1	1	0	0	0	0	0	0	1	0		3
HSD17B8	1	0	0	0	0	0	0	1	0	0	0	0	0	0	0	1		3
GNS	0	0	0	0	0	1	0	0	0	0	1	1	0	0	0	0		3
ARL3	0	0	0	0	0	0	1	1	0	0	0	1	0	0	0	0		3
RAB1B	1	0	0	0	0	0	0	1	0	0	0	0	0	0	0	1		3
EZH1	0	0	0	0	0	0	0	1	0	0	0	0	0	0	1	1		3
TP53BP1	0	0	0	1	1	0	0	1	0	0	0	0	0	0	0	0		3
SPRED2	0	0	0	0	0	0	0	1	0	1	0	0	0	0	0	1		3
ECHDC2	0	0	1	0	0	0	0	1	0	0	0	1	0	0	0	0		3
HIST2H2AA4	1	0	1	0	0	1	0	0	0	0	0	0	0	0	0	0		3
SIRT3	0	0	0	0	0	0	1	1	0	0	0	0	0	0	0	1		3
CTDSP2	1	0	1	0	0	1	0	0	0	0	0	0	0	0	0	0		3
SERF2	1	0	0	0	0	0	0	1	0	0	0	0	0	1	0	0		3
CDH1	1	0	1	0	0	0	0	0	0	1	0	0	0	0	0	0		3
AGR3	0	1	0	0	0	0	0	0	0	0	1	0	0	1	0	0		3
TLOC1	1	0	0	0	0	0	0	0	0	0	0	1	0	1	0	0		3
WDR23	1	0	0	0	0	1	0	1	0	0	0	0	0	0	0	0		3
SH3BP4	0	0	0	0	0	1	0	1	0	1	0	0	0	0	0	0		3
NUP88	0	1	0	0	0	0	0	0	0	0	1	0	0	1	0	0		3
WDR61	1	0	1	0	0	0	0	1	0	0	0	0	0	0	0	0		3
EIF2AK1	1	0	1	0	0	1	0	0	0	0	0	0	0	0	0	0		3
APEH	1	0	0	0	0	0	0	1	0	0	0	0	0	0	0	1		3
EFHD1	1	0	1	0	0	0	0	0	0	0	0	1	0	0	0	0		3
ACY1	1	0	0	0	0	1	0	1	0	0	0	0	0	0	0	0		3
ETNK2	1	0	0	0	0	0	0	0	1	1	0	0	0	0	0	0		3
SLC27A2	1	0	0	0	0	0	0	1	0	0	0	0	0	0	1	0		3
WDFY3	0	0	0	0	0	0	0	0	0	0	1	1	0	0	0	1		3
HIST1H2BG	1	0	0	0	0	1	0	0	0	0	0	1	0	0	0	0		3
C3orf14	1	0	0	0	0	0	0	0	0	1	0	1	0	0	0	0		3
GLUD1	0	0	0	0	0	0	0	1	0	1	0	0	0	0	1	0		3
PRSS8	1	0	1	0	0	1	0	0	0	0	0	0	0	0	0	0		3
RNF41	1	0	0	0	0	1	0	1	0	0	0	0	0	0	0	0		3
KIAA0430	0	0	1	0	0	1	0	0	0	0	0	0	0	0	0	1		3
LRRC37A4	0	0	0	0	0	0	1	1	0	0	0	0	0	0	0	1		3
CLN3	1	0	1	0	0	1	0	0	0	0	0	0	0	0	0	0		3
IGBP1	0	0	0	0	0	1	0	1	0	1	0	0	0	0	0	0		3
ALDH4A1	1	0	0	0	0	1	0	0	0	1	0	0	0	0	0	0		3
RPH3AL	0	0	0	0	0	0	0	1	0	1	0	0	0	0	0	1		3
ALAD	1	0	0	0	0	1	0	1	0	0	0	0	0	0	0	0		3
KCNK15	0	0	0	0	0	0	0	1	0	0	0	0	0	1	0	1		3
SFPQ	0	0	1	0	0	0	0	0	0	0	0	1	0	0	1	0		3
SLC35A1	1	0	1	0	0	1	0	0	0	0	0	0	0	0	0	0		3
XIST	0	1	1	0	0	0	0	0	0	0	1	0	0	0	0	0		3
CYP4B1	0	0	0	0	0	1	0	0	0	0	0	1	0	0	0	1		3
DDX23	1	0	0	1	1	0	0	0	0	0	0	0	0	0	0	0		3
SFRS5	0	0	1	0	0	0	1	0	0	0	0	1	0	0	0	0		3
RNASE4	0	0	1	0	0	0	0	1	0	0	0	0	0	0	1	0		3
COQ4	0	0	0	0	0	0	0	1	0	1	1	0	0	0	0	0		3
CTBP1	1	0	0	1	1	0	0	0	0	0	0	0	0	0	0	0		3
SRP14	0	0	0	0	0	1	0	1	0	0	0	0	0	0	0	1		3
GTF3C1	1	0	1	0	0	0	0	0	0	0	0	1	0	0	0	0		3
RREB1	0	0	1	0	0	0	0	0	0	1	1	0	0	0	0	0		3
EID1	0	0	0	0	0	1	0	1	0	0	0	1	0	0	0	0		3
PLA2G12A	1	0	0	0	0	0	0	0	1	0	0	0	0	1	0	0		3
ZMYND8	1	0	0	0	0	0	0	0	0	1	1	0	0	0	0	0		3
CX3CR1	0	0	1	0	0	0	0	0	0	0	0	1	0	0	1	0		3
CCNT2	1	0	1	0	0	0	0	0	0	0	0	0	0	0	0	1		3
GNAQ	0	0	1	0	0	1	0	0	0	0	0	0	0	1	0	0		3
CLDN3	1	0	1	0	0	1	0	0	0	0	0	0	0	0	0	0		3
ZNF512B	1	0	0	0	0	0	0	0	0	0	0	1	0	0	0	0		2
HIG2	1	0	0	0	0	1	0	0	0	0	0	0	0	0	0	0		2
XXyac-YX155B6.1	0	0	1	0	0	0	0	0	0	0	0	1	0	0	0	0		2
BCAT2	1	0	0	0	0	0	0	1	0	0	0	0	0	0	0	0		2
HERC1	0	0	1	0	0	1	0	0	0	0	0	0	0	0	0	0		2
SMARCA2	0	0	1	0	0	1	0	0	0	0	0	0	0	0	0	0		2
LOC646417	1	0	0	0	0	0	0	1	0	0	0	0	0	0	0	0		2
SNRPN	0	0	1	0	0	0	0	0	0	0	0	1	0	0	0	0		2
TFAP2B	0	0	1	0	0	0	0	0	0	1	0	0	0	0	0	0		2
ABCC5	1	0	0	0	0	1	0	0	0	0	0	0	0	0	0	0		2
KIAA0500	0	0	0	0	0	1	0	1	0	0	0	0	0	0	0	0		2
PSEN1	1	0	0	0	0	0	0	0	0	0	0	0	0	0	0	1		2
PLEKHB2	0	0	0	1	1	0	0	0	0	0	0	0	0	0	0	0		2
OCEL1	0	0	0	0	0	0	0	1	0	0	0	0	0	0	0	1		2
MAP7	1	0	1	0	0	0	0	0	0	0	0	0	0	0	0	0		2
HIST1H2BF	0	0	0	0	0	1	0	0	0	0	0	1	0	0	0	0		2
GFER	1	0	0	0	0	0	0	1	0	0	0	0	0	0	0	0		2
ABI1	1	0	0	0	0	1	0	0	0	0	0	0	0	0	0	0		2
HNRPA3P1	0	0	1	0	0	0	0	0	0	0	0	0	0	0	0	1		2
PCF11	1	0	1	0	0	0	0	0	0	0	0	0	0	0	0	0		2
SEMA4A	1	0	0	0	0	1	0	0	0	0	0	0	0	0	0	0		2
ADCY1	0	0	0	0	0	0	0	1	0	0	0	0	0	0	1	0		2
C2orf28	0	0	0	0	0	1	0	1	0	0	0	0	0	0	0	0		2
RABGAP1L	1	0	1	0	0	0	0	0	0	0	0	0	0	0	0	0		2
NFATC4	0	0	1	0	0	0	0	0	0	0	0	0	0	1	0	0		2
FLJ11506	0	0	0	0	0	0	0	1	0	0	0	0	0	1	0	0		2
EXDL2	1	0	0	0	0	1	0	0	0	0	0	0	0	0	0	0		2
YLPM1	1	0	1	0	0	0	0	0	0	0	0	0	0	0	0	0		2
DGCR6	0	0	0	0	0	0	0	1	0	0	0	1	0	0	0	0		2
tcag7.1314	0	0	0	0	0	1	0	0	0	0	0	1	0	0	0	0		2
UQCRQ	0	0	0	0	0	0	0	1	0	1	0	0	0	0	0	0		2
VAMP8	1	0	0	0	0	1	0	0	0	0	0	0	0	0	0	0		2
RBM6	0	0	1	0	0	0	0	0	0	0	1	0	0	0	0	0		2
TOX4	1	0	0	0	0	0	1	0	0	0	0	0	0	0	0	0		2
NBEAL2	1	0	1	0	0	0	0	0	0	0	0	0	0	0	0	0		2
CEP290	0	0	0	0	0	0	0	0	0	0	0	0	0	1	0	1		2
E4F1	1	0	1	0	0	0	0	0	0	0	0	0	0	0	0	0		2
SOX13	1	0	0	0	0	0	0	0	0	0	0	1	0	0	0	0		2
PLK2	0	0	0	0	0	1	0	0	0	0	0	1	0	0	0	0		2
AFTPH	1	0	1	0	0	0	0	0	0	0	0	0	0	0	0	0		2
KLHL23	0	0	0	0	0	0	0	0	0	0	1	0	0	1	0	0		2
MYL5	0	0	0	0	0	1	0	1	0	0	0	0	0	0	0	0		2
FECH	1	0	0	0	0	0	0	0	0	0	0	1	0	0	0	0		2
HEBP1	0	0	0	0	0	1	0	0	0	0	0	1	0	0	0	0		2
LAMP1	0	0	0	1	1	0	0	0	0	0	0	0	0	0	0	0		2
DHRS2	0	0	0	0	0	0	0	0	0	1	0	0	0	0	0	1		2
PMS2L8	1	0	1	0	0	0	0	0	0	0	0	0	0	0	0	0		2
RYBP	1	0	0	0	0	1	0	0	0	0	0	0	0	0	0	0		2
GRINL1A	0	0	0	0	0	0	0	1	0	0	0	0	0	0	0	1		2
TCTA	0	0	0	0	0	0	0	1	0	0	0	0	0	0	0	1		2
ATP9A	1	0	0	0	0	1	0	0	0	0	0	0	0	0	0	0		2
RPS14	0	0	0	0	0	0	0	1	0	0	0	0	0	0	1	0		2
TMEM127	0	0	0	1	1	0	0	0	0	0	0	0	0	0	0	0		2
TBC1D12	0	0	0	0	0	0	0	1	0	0	0	0	0	0	0	1		2
TSC22D1	0	0	0	0	0	1	0	0	0	1	0	0	0	0	0	0		2
CD9	1	0	0	0	0	1	0	0	0	0	0	0	0	0	0	0		2
GLT8D1	0	0	0	0	0	0	0	1	0	0	0	0	0	0	0	1		2
CYBRD1	0	0	0	0	0	0	1	0	0	0	0	0	1	0	0	0		2
MADD	1	0	0	0	0	0	0	0	0	0	0	0	0	0	0	1		2
TLE2	1	0	1	0	0	0	0	0	0	0	0	0	0	0	0	0		2
IFITM2	0	0	1	0	0	0	0	0	0	0	0	0	0	0	0	1		2
DLG3	1	0	1	0	0	0	0	0	0	0	0	0	0	0	0	0		2
PDCD2	1	0	0	0	0	1	0	0	0	0	0	0	0	0	0	0		2
EMP2	1	0	1	0	0	0	0	0	0	0	0	0	0	0	0	0		2
TTLL3	0	0	1	0	0	0	0	0	0	0	0	1	0	0	0	0		2
BAMBI	1	0	0	0	0	1	0	0	0	0	0	0	0	0	0	0		2
GPATCH2	0	0	1	0	0	0	0	0	0	0	0	1	0	0	0	0		2
BPTF	1	0	0	0	0	0	0	0	0	0	0	0	0	0	0	1		2
IDS	0	0	0	1	1	0	0	0	0	0	0	0	0	0	0	0		2
IGFBP2	1	0	1	0	0	0	0	0	0	0	0	0	0	0	0	0		2
DHCR24	0	0	0	0	0	0	0	0	0	1	0	1	0	0	0	0		2
BSDC1	0	0	1	0	0	0	0	0	0	0	0	1	0	0	0	0		2
UBL3	1	0	1	0	0	0	0	0	0	0	0	0	0	0	0	0		2
IL13RA1	0	0	1	0	0	0	0	0	0	1	0	0	0	0	0	0		2
CMBL	0	0	0	0	0	0	0	0	0	0	1	0	0	1	0	0		2
DICER1	1	0	1	0	0	0	0	0	0	0	0	0	0	0	0	0		2
IHPK1	0	0	0	0	0	0	0	0	0	0	0	0	0	0	1	1		2
INTS3	1	0	1	0	0	0	0	0	0	0	0	0	0	0	0	0		2
NDUFS2	1	0	1	0	0	0	0	0	0	0	0	0	0	0	0	0		2
AFF4	0	0	0	0	0	0	0	0	0	0	1	0	0	1	0	0		2
PJA2	0	0	0	0	0	0	0	0	0	0	0	1	0	0	0	1		2
RPS4X	0	0	0	0	0	0	0	1	0	0	0	0	0	0	1	0		2
DYNC2H1	0	0	0	0	0	0	0	1	0	0	0	1	0	0	0	0		2
C12orf44	1	0	0	0	0	0	0	1	0	0	0	0	0	0	0	0		2
PERLD1	0	0	1	0	0	0	0	0	0	1	0	0	0	0	0	0		2
PEX12	0	0	0	0	0	0	0	1	0	0	0	0	0	0	0	1		2
LDOC1	0	0	0	0	0	1	0	0	0	0	0	1	0	0	0	0		2
GSS	0	0	0	0	0	0	0	0	0	1	0	0	0	0	0	1		2
TPCN1	0	0	0	0	0	0	0	0	0	1	1	0	0	0	0	0		2
FBXL15	0	0	0	0	0	1	0	1	0	0	0	0	0	0	0	0		2
SLC35D1	0	0	0	1	1	0	0	0	0	0	0	0	0	0	0	0		2
GGA2	1	0	0	0	0	0	0	0	0	0	0	1	0	0	0	0		2
ZNF638	0	0	1	0	0	0	0	0	0	0	0	1	0	0	0	0		2
TARBP1	0	0	1	0	0	0	0	0	0	0	0	0	0	0	0	1		2
KIAA0141	0	0	0	0	0	0	0	1	0	0	0	0	0	1	0	0		2
CENTD1	1	0	1	0	0	0	0	0	0	0	0	0	0	0	0	0		2
NOTCH2NL	0	0	1	0	0	0	0	0	0	0	0	1	0	0	0	0		2
ULK2	0	0	1	0	0	0	0	0	0	0	0	1	0	0	0	0		2
CGRRF1	0	0	0	0	0	0	0	1	0	0	0	1	0	0	0	0		2
DTX3	0	0	1	0	0	0	0	0	0	0	0	0	0	1	0	0		2
ATG2B	1	0	0	0	0	0	0	0	0	0	0	0	0	0	0	1		2
TNS1	0	0	0	1	1	0	0	0	0	0	0	0	0	0	0	0		2
ECE1	0	0	0	0	0	0	0	1	0	0	0	0	0	1	0	0		2
TP53I11	1	0	1	0	0	0	0	0	0	0	0	0	0	0	0	0		2
TFAP2C	1	0	0	0	0	0	0	0	0	0	0	1	0	0	0	0		2
HAGH	1	0	0	0	0	0	0	1	0	0	0	0	0	0	0	0		2
ENPP1	0	0	0	0	0	0	0	0	0	1	0	1	0	0	0	0		2
C1orf63	0	0	1	0	0	1	0	0	0	0	0	0	0	0	0	0		2
TMEM16A	0	0	1	0	0	0	0	0	0	0	0	1	0	0	0	0		2
ZNF217	1	0	0	0	0	1	0	0	0	0	0	0	0	0	0	0		2
UGDH	0	0	0	0	0	0	0	1	0	1	0	0	0	0	0	0		2
BMI1	0	0	0	0	0	1	0	0	0	0	0	1	0	0	0	0		2
HIST1H3H	1	0	0	0	0	1	0	0	0	0	0	0	0	0	0	0		2
CLDN4	1	0	0	0	0	1	0	0	0	0	0	0	0	0	0	0		2
PAWR	1	0	0	0	0	1	0	0	0	0	0	0	0	0	0	0		2
SGSM3	1	0	0	0	0	1	0	0	0	0	0	0	0	0	0	0		2
CAMLG	0	0	0	0	0	0	0	1	0	0	0	0	0	0	0	1		2
UBE2I	0	0	0	0	0	0	0	1	0	0	0	0	0	1	0	0		2
UBE3A	1	0	1	0	0	0	0	0	0	0	0	0	0	0	0	0		2
C9orf91	0	0	0	0	0	1	0	0	0	0	0	1	0	0	0	0		2
RHOH	1	0	1	0	0	0	0	0	0	0	0	0	0	0	0	0		2
C6orf120	1	0	0	0	0	1	0	0	0	0	0	0	0	0	0	0		2
HIST1H2BC	0	0	0	0	0	1	0	0	0	0	0	1	0	0	0	0		2
OBSL1	0	0	0	0	0	1	0	0	0	0	0	1	0	0	0	0		2
C10orf26	0	0	0	0	0	1	0	1	0	0	0	0	0	0	0	0		2
KCNMA1	0	0	1	0	0	0	0	1	0	0	0	0	0	0	0	0		2
C5orf3	0	0	0	0	0	0	0	1	0	0	0	0	0	0	0	1		2
BLOC1S1	1	0	0	0	0	0	0	1	0	0	0	0	0	0	0	0		2
SYNGR1	1	0	0	0	0	0	0	0	0	0	0	1	0	0	0	0		2
C5orf15	0	0	0	0	0	0	0	0	0	0	0	0	0	1	0	1		2
PPP2R4	1	0	0	0	0	0	0	1	0	0	0	0	0	0	0	0		2
PBXIP1	0	0	1	0	0	1	0	0	0	0	0	0	0	0	0	0		2
CREBL2	0	0	0	0	0	0	0	1	0	0	0	1	0	0	0	0		2
FLJ22184	0	0	1	0	0	0	0	0	0	0	0	1	0	0	0	0		2
AREG	0	0	0	0	0	0	0	0	0	1	0	0	0	0	0	1		2
MGMT	1	0	1	0	0	0	0	0	0	0	0	0	0	0	0	0		2
TMEM41B	0	0	0	0	0	0	0	0	0	0	0	0	1	0	0	1		2
C4orf8	0	0	1	0	0	0	0	0	0	0	0	0	0	0	0	1		2
SLC24A3	1	0	0	0	0	1	0	0	0	0	0	0	0	0	0	0		2
UQCR	0	0	0	0	0	1	0	1	0	0	0	0	0	0	0	0		2
WDTC1	0	0	0	1	1	0	0	0	0	0	0	0	0	0	0	0		2
TMEM49	0	0	1	0	0	0	0	0	0	1	0	0	0	0	0	0		2
DKFZp586I1420	1	0	1	0	0	0	0	0	0	0	0	0	0	0	0	0		2
BAG1	0	0	0	0	0	0	0	1	0	0	0	0	0	0	1	0		2
BRWD1	1	0	0	0	0	0	0	0	0	0	0	0	0	1	0	0		2
ZMIZ1	1	0	0	0	0	1	0	0	0	0	0	0	0	0	0	0		2
RAB27B	0	0	0	0	0	1	0	0	0	1	0	0	0	0	0	0		2
AUH	0	0	0	0	0	1	0	1	0	0	0	0	0	0	0	0		2
SDHC	1	0	0	0	0	1	0	0	0	0	0	0	0	0	0	0		2
SEPT8	0	0	0	1	1	0	0	0	0	0	0	0	0	0	0	0		2
SLC26A3	0	0	0	0	0	0	0	1	0	0	0	0	0	0	0	1		2
C14orf147	1	0	0	0	0	0	0	0	0	1	0	0	0	0	0	0		2
ZC3H11A	0	0	1	0	0	0	0	0	0	0	0	1	0	0	0	0		2
SLTM	0	0	1	0	0	1	0	0	0	0	0	0	0	0	0	0		2
ATP6V1G1	1	0	0	0	0	0	0	0	0	0	0	1	0	0	0	0		2
EPHX2	0	0	1	0	0	0	1	0	0	0	0	0	0	0	0	0		2
FAM128A	1	0	0	0	0	0	0	1	0	0	0	0	0	0	0	0		2
C20orf11	1	0	0	0	0	1	0	0	0	0	0	0	0	0	0	0		2
ARID4A	1	0	0	0	0	1	0	0	0	0	0	0	0	0	0	0		2
CTBP2	1	0	0	0	0	1	0	0	0	0	0	0	0	0	0	0		2
SLC2A4RG	1	0	0	0	0	0	0	0	0	0	0	1	0	0	0	0		2
RP11-125A7.3	0	0	1	0	0	0	0	1	0	0	0	0	0	0	0	0		2
VAMP5	1	0	0	0	0	1	0	0	0	0	0	0	0	0	0	0		2
SPATA2	1	0	0	0	0	0	0	0	0	0	0	0	0	0	0	1		2
IQGAP2	0	0	1	0	0	0	0	0	0	1	0	0	0	0	0	0		2
FGFR4	1	0	0	0	0	0	0	0	0	1	0	0	0	0	0	0		2
UBE2Q1	1	0	0	0	0	1	0	0	0	0	0	0	0	0	0	0		2
SUV420H1	1	0	0	0	0	1	0	0	0	0	0	0	0	0	0	0		2
SQRDL	0	0	0	0	0	1	0	0	0	1	0	0	0	0	0	0		2
MIA3	0	0	1	0	0	0	0	0	0	1	0	0	0	0	0	0		2
RXRA	1	0	0	0	0	1	0	0	0	0	0	0	0	0	0	0		2
ANKRD30A	0	0	0	0	0	0	0	0	0	0	1	0	0	1	0	0		2
VIPR1	1	0	0	0	0	1	0	0	0	0	0	0	0	0	0	0		2
RNF139	1	0	1	0	0	0	0	0	0	0	0	0	0	0	0	0		2
PIAS1	0	0	1	0	0	0	0	0	0	0	0	0	0	1	0	0		2
MAP2K1IP1	0	0	0	0	0	1	0	1	0	0	0	0	0	0	0	0		2
LENG4	1	0	0	0	0	0	0	1	0	0	0	0	0	0	0	0		2
ARRB1	1	0	0	0	0	0	0	0	0	0	1	0	0	0	0	0		2
VPS39	0	0	0	0	0	0	0	0	0	0	0	0	0	0	1	1		2
PIK3R1	0	0	1	0	0	1	0	0	0	0	0	0	0	0	0	0		2
HDGFRP3	0	0	0	0	0	1	0	0	0	0	0	1	0	0	0	0		2
TMEM25	0	0	0	0	0	0	0	0	0	0	1	0	0	1	0	0		2
TMEM132A	1	0	0	0	0	0	0	0	0	0	0	1	0	0	0	0		2
C1orf9	1	0	0	0	0	0	0	0	0	0	0	1	0	0	0	0		2
TRPM4	1	0	1	0	0	0	0	0	0	0	0	0	0	0	0	0		2
EEF2	0	0	0	0	0	0	0	1	0	0	0	0	0	0	1	0		2
SLC38A1	1	0	0	0	0	1	0	0	0	0	0	0	0	0	0	0		2
SCD	1	0	0	0	0	0	0	0	0	1	0	0	0	0	0	0		2
MED14	0	0	0	1	1	0	0	0	0	0	0	0	0	0	0	0		2
RPL13A	0	0	0	0	0	1	0	1	0	0	0	0	0	0	0	0		2
AMZ2	1	0	0	0	0	0	0	0	0	0	0	0	0	0	0	1		2
C20orf149	1	0	0	0	0	0	0	0	0	0	0	0	0	0	0	1		2
RPL17	0	0	1	0	0	1	0	0	0	0	0	0	0	0	0	0		2
TBC1D3	0	0	1	0	0	0	0	0	0	0	0	1	0	0	0	0		2
CYP2B7P1	1	0	0	0	0	0	0	1	0	0	0	0	0	0	0	0		2
MED13	0	0	0	0	0	1	0	0	0	0	0	0	0	0	0	1		2
F7	0	0	0	0	0	0	0	0	0	1	0	0	0	1	0	0		2
SERF1A	0	0	0	0	0	0	0	0	0	0	1	0	0	1	0	0		2
TMEM115	0	0	0	0	0	0	0	1	0	0	0	0	0	0	1	0		2
CPEB2	0	0	0	0	0	0	0	0	0	0	1	0	0	1	0	0		2
MRPS34	1	0	0	0	0	0	0	1	0	0	0	0	0	0	0	0		2
FBXW2	1	0	0	0	0	0	0	0	0	1	0	0	0	0	0	0		2
ATP8B1	0	0	0	0	0	0	0	0	0	0	1	0	0	1	0	0		2
HSPB1	0	0	0	0	0	0	0	0	0	0	0	1	0	0	0	1		2
ATP8A1	1	0	0	0	0	1	0	0	0	0	0	0	0	0	0	0		2
LIN7A	0	0	0	0	0	1	0	0	0	0	0	0	0	0	0	1		2
MB	0	0	1	0	0	0	0	0	0	0	0	1	0	0	0	0		2
FRAT2	1	0	0	0	0	1	0	0	0	0	0	0	0	0	0	0		2
NACA	0	0	1	0	0	0	0	0	0	0	1	0	0	0	0	0		2
UTX	0	0	1	0	0	1	0	0	0	0	0	0	0	0	0	0		2
NUDCD3	0	0	0	1	1	0	0	0	0	0	0	0	0	0	0	0		2
NDUFA7	0	0	0	0	0	0	0	1	1	0	0	0	0	0	0	0		2
PEX11B	1	0	1	0	0	0	0	0	0	0	0	0	0	0	0	0		2
TGFB3	1	0	0	0	0	0	0	0	0	0	1	0	0	0	0	0		2
ENTPD5	0	0	0	0	0	0	0	0	0	0	1	0	0	1	0	0		2
BEXL1	0	0	1	0	0	0	0	0	0	0	0	1	0	0	0	0		2
THRA	1	0	1	0	0	0	0	0	0	0	0	0	0	0	0	0		2
TSG101	0	0	0	0	0	1	0	1	0	0	0	0	0	0	0	0		2
DEGS2	0	1	0	0	0	0	0	0	0	0	0	0	0	1	0	0		2
GPR89A	1	0	0	0	0	0	0	0	0	0	0	1	0	0	0	0		2
PAIP1	1	0	0	0	0	0	0	0	1	0	0	0	0	0	0	0		2
TELO2	1	0	0	0	0	0	0	0	0	0	0	0	0	0	1	0		2
LOH11CR2A	0	0	1	0	0	0	0	0	0	1	0	0	0	0	0	0		2
CRAT	1	0	0	0	0	0	0	0	0	1	0	0	0	0	0	0		2
CNKSR1	0	0	1	0	0	1	0	0	0	0	0	0	0	0	0	0		2
SIDT2	1	0	0	0	0	1	0	0	0	0	0	0	0	0	0	0		2
RBM39	0	0	1	0	0	0	0	0	0	0	0	0	0	1	0	0		2
THTPA	1	0	0	0	0	0	0	1	0	0	0	0	0	0	0	0		2
HISPPD2A	0	0	0	0	0	0	0	1	0	0	0	0	0	1	0	0		2
NPEPL1	1	0	1	0	0	0	0	0	0	0	0	0	0	0	0	0		2
ENTPD1	1	0	0	0	0	1	0	0	0	0	0	0	0	0	0	0		2
C20orf3	0	0	0	1	1	0	0	0	0	0	0	0	0	0	0	0		2
FZD4	0	0	0	0	0	1	0	0	0	0	0	0	0	0	0	1		2
EPN3	1	0	1	0	0	0	0	0	0	0	0	0	0	0	0	0		2
MAPBPIP	1	0	0	0	0	0	0	1	0	0	0	0	0	0	0	0		2
LOC643641	0	0	0	0	0	1	0	0	0	0	0	1	0	0	0	0		2
LOC728844	0	0	1	0	0	0	0	0	0	0	1	0	0	0	0	0		2
AXL	0	0	0	1	1	0	0	0	0	0	0	0	0	0	0	0		2
PBLD	1	0	1	0	0	0	0	0	0	0	0	0	0	0	0	0		2
TMCC1	1	0	0	0	0	1	0	0	0	0	0	0	0	0	0	0		2
TRIM33	1	0	0	0	0	1	0	0	0	0	0	0	0	0	0	0		2
PIK3C2B	1	0	1	0	0	0	0	0	0	0	0	0	0	0	0	0		2
MLL	0	1	0	0	0	0	0	0	0	0	0	0	0	1	0	0		2
SUSD4	1	0	0	0	0	0	0	0	0	0	0	1	0	0	0	0		2
MPG	0	0	0	0	0	1	0	1	0	0	0	0	0	0	0	0		2
TLE3	1	0	0	0	0	0	0	0	0	0	0	0	0	1	0	0		2
ELF3	0	0	1	0	0	1	0	0	0	0	0	0	0	0	0	0		2
ENOSF1	0	0	1	0	0	0	0	0	0	0	0	1	0	0	0	0		2
RPS28	0	0	0	0	0	1	0	1	0	0	0	0	0	0	0	0		2
USP7	1	0	1	0	0	0	0	0	0	0	0	0	0	0	0	0		2
TRAF5	0	0	1	0	0	1	0	0	0	0	0	0	0	0	0	0		2
DAAM1	1	0	0	0	0	0	0	0	0	0	0	1	0	0	0	0		2
2008-03-08	0	0	0	0	0	0	1	1	0	0	0	0	0	0	0	0		2
STX18	0	0	0	0	0	0	0	1	0	0	0	0	0	0	0	1		2
LYST	0	0	1	0	0	0	0	0	0	0	0	1	0	0	0	0		2
SHANK2	1	0	0	0	0	1	0	0	0	0	0	0	0	0	0	0		2
SPR	0	0	0	0	0	0	0	1	0	0	0	0	0	0	1	0		2
GP2	0	0	0	0	0	0	0	1	0	0	0	0	0	0	0	1		2
NDUFC1	1	0	0	0	0	0	0	1	0	0	0	0	0	0	0	0		2
TNFSF10	0	0	1	0	0	1	0	0	0	0	0	0	0	0	0	0		2
AKR7A2	0	0	0	0	0	0	0	1	0	0	0	0	0	0	1	0		2
TARP	1	0	0	0	0	1	0	0	0	0	0	0	0	0	0	0		2
RGS5	0	0	1	0	0	0	0	0	0	0	0	0	0	0	0	1		2
MYST1	1	0	1	0	0	0	0	0	0	0	0	0	0	0	0	0		2
TNK2	0	0	0	0	0	0	0	0	0	0	0	1	0	0	1	0		2
CASD1	0	0	1	0	0	0	0	0	0	0	0	0	0	0	0	1		2
SCAND1	0	0	0	0	0	1	0	1	0	0	0	0	0	0	0	0		2
SPATA7	0	0	0	0	0	0	0	0	0	0	0	0	0	1	0	1		2
MCF2L	1	0	1	0	0	0	0	0	0	0	0	0	0	0	0	0		2
RTN1	0	0	1	0	0	0	0	0	0	0	0	1	0	0	0	0		2
PTPLAD1	1	0	0	0	0	0	0	1	0	0	0	0	0	0	0	0		2
CEP350	0	0	1	0	0	0	0	0	0	0	0	1	0	0	0	0		2
UCP2	1	0	0	0	0	1	0	0	0	0	0	0	0	0	0	0		2
GNB2L1	0	0	0	0	0	1	0	0	0	0	0	0	0	0	1	0		2
ARHGEF16	1	0	1	0	0	0	0	0	0	0	0	0	0	0	0	0		2
CHMP4B	0	0	0	0	0	0	0	0	0	0	1	0	0	1	0	0		2
PTK6	1	0	0	0	0	0	0	0	1	0	0	0	0	0	0	0		2
HIST1H4H	1	0	0	0	0	1	0	0	0	0	0	0	0	0	0	0		2
PAFAH2	0	0	0	0	0	0	0	1	0	0	0	0	0	0	0	1		2
USP34	0	0	1	0	0	0	0	0	0	0	0	1	0	0	0	0		2
STOM	1	0	1	0	0	0	0	0	0	0	0	0	0	0	0	0		2
RPS27L	0	0	0	0	0	1	0	1	0	0	0	0	0	0	0	0		2
CLGN	0	0	0	0	0	0	0	0	0	0	0	1	0	0	0	1		2
CCNG1	0	0	0	0	0	1	0	1	0	0	0	0	0	0	0	0		2
HNRNPA1	0	0	1	0	0	0	0	1	0	0	0	0	0	0	0	0		2
PI4KAP1	0	0	1	0	0	1	0	0	0	0	0	0	0	0	0	0		2
DFNB31	0	0	1	0	0	0	0	0	0	0	0	1	0	0	0	0		2
CLASP2	0	0	0	0	0	0	0	0	0	0	0	0	0	0	1	1		2
AMDHD2	0	0	0	0	0	1	0	1	0	0	0	0	0	0	0	0		2
ZNHIT4	1	0	0	0	0	1	0	0	0	0	0	0	0	0	0	0		2
TANC2	0	0	0	0	0	0	0	0	0	0	1	0	0	0	0	1		2
MAN1C1	1	0	1	0	0	0	0	0	0	0	0	0	0	0	0	0		2
PLCB4	1	0	0	0	0	1	0	0	0	0	0	0	0	0	0	0		2
TMEM144	0	0	0	0	0	0	0	0	0	0	1	0	0	1	0	0		2
CNTNAP2	1	0	0	0	0	0	0	0	0	1	0	0	0	0	0	0		2
C1orf56	1	0	0	0	0	1	0	0	0	0	0	0	0	0	0	0		2
ACOT2	0	0	0	0	0	1	0	0	0	0	0	0	0	0	0	1		2
CDKN1B	1	0	0	0	0	1	0	0	0	0	0	0	0	0	0	0		2
ATP6V0E2	1	0	0	0	0	0	0	0	0	0	0	1	0	0	0	0		2
RHOD	1	0	0	0	0	0	0	0	0	0	0	1	0	0	0	0		2
FEM1B	1	0	0	0	0	0	0	1	0	0	0	0	0	0	0	0		2
ELL3	1	0	0	0	0	0	0	0	1	0	0	0	0	0	0	0		2
ZNF83	0	0	1	0	0	0	0	0	0	0	0	1	0	0	0	0		2
HRASLS3	0	0	0	0	0	1	0	1	0	0	0	0	0	0	0	0		2
ACOX2	0	0	0	0	0	0	0	1	0	1	0	0	0	0	0	0		2
DGKD	0	1	0	0	0	0	0	0	0	0	1	0	0	0	0	0		2
PSCD2	0	0	0	0	0	1	0	1	0	0	0	0	0	0	0	0		2
ITPK1	1	0	0	0	0	0	0	1	0	0	0	0	0	0	0	0		2
POLR3K	1	0	0	0	0	0	0	1	0	0	0	0	0	0	0	0		2
SFI1	0	0	1	0	0	0	0	0	0	0	0	0	0	0	1	0		2
UBE2N	1	0	0	0	0	0	0	0	0	1	0	0	0	0	0	0		2
CKMT1B	1	0	0	0	0	1	0	0	0	0	0	0	0	0	0	0		2
HOXC6	0	0	1	0	0	0	0	0	0	0	0	1	0	0	0	0		2
HIST1H2AE	1	0	0	0	0	1	0	0	0	0	0	0	0	0	0	0		2
RWDD2A	1	0	0	0	0	1	0	0	0	0	0	0	0	0	0	0		2
HCRP1	0	0	1	0	0	0	0	0	0	1	0	0	0	0	0	0		2
ZCCHC2	1	0	1	0	0	0	0	0	0	0	0	0	0	0	0	0		2
ZSCAN16	1	0	0	0	0	1	0	0	0	0	0	0	0	0	0	0		2
RPS9	0	0	0	0	0	1	0	1	0	0	0	0	0	0	0	0		2
DYRK1B	1	0	0	0	0	1	0	0	0	0	0	0	0	0	0	0		2
LYPD3	1	0	0	0	0	0	0	0	0	0	0	1	0	0	0	0		2
ZNF444	1	0	0	0	0	1	0	0	0	0	0	0	0	0	0	0		2
RERG	0	0	0	0	0	0	0	0	0	0	1	0	0	1	0	0		2
C15orf15	0	0	0	0	0	1	0	1	0	0	0	0	0	0	0	0		2
CCNI	0	0	0	0	0	1	0	0	0	0	0	1	0	0	0	0		2
CDS1	0	0	1	0	0	0	0	0	1	0	0	0	0	0	0	0		2
USP8	1	0	0	0	0	0	0	0	0	0	0	0	0	1	0	0		2
PCLO	0	0	0	0	0	0	0	0	0	0	0	0	0	1	0	1		2
BCAS1	1	0	0	0	0	0	0	0	0	0	0	0	0	0	0	1		2
TNRC15	0	0	1	0	0	1	0	0	0	0	0	0	0	0	0	0		2
RPL14	0	0	0	0	0	1	0	1	0	0	0	0	0	0	0	0		2
FBXO38	0	0	0	0	0	0	0	0	0	0	1	0	0	1	0	0		2
MFAP3L	1	0	0	0	0	1	0	0	0	0	0	0	0	0	0	0		2
RPS6KA5	1	0	0	0	0	1	0	0	0	0	0	0	0	0	0	0		2
C2orf55	0	0	0	0	0	0	0	0	0	0	1	0	0	1	0	0		2
HADHB	1	0	0	0	0	1	0	0	0	0	0	0	0	0	0	0		2
LOC728411	0	0	1	0	0	0	0	0	0	0	1	0	0	0	0	0		2
RAB6A	1	0	0	0	0	1	0	0	0	0	0	0	0	0	0	0		2
ISYNA1	0	0	1	0	0	0	0	0	0	0	0	1	0	0	0	0		2
TUSC2	0	0	0	0	0	0	0	1	0	0	0	0	0	1	0	0		2
RMND5A	1	0	0	0	0	1	0	0	0	0	0	0	0	0	0	0		2
HIST1H2BE	0	0	0	0	0	1	0	0	0	0	0	1	0	0	0	0		2
IQCH	1	0	0	0	0	0	0	0	0	0	0	0	0	0	0	1		2
CSNK1G3	0	0	0	0	0	0	0	0	0	0	0	0	0	1	0	1		2
KIAA0256	1	0	0	0	0	1	0	0	0	0	0	0	0	0	0	0		2
MFAP1	0	0	0	0	0	0	0	1	0	0	0	0	0	0	0	1		2
HECTD2	0	0	0	0	0	0	0	0	0	0	1	0	0	1	0	0		2
CLTC	0	0	0	0	0	0	0	0	0	1	0	0	0	0	0	1		2
AP2B1	0	0	0	0	0	0	0	1	0	0	0	0	0	0	0	1		2
KIAA0513	1	0	0	0	0	1	0	0	0	0	0	0	0	0	0	0		2
MPPED2	1	0	0	0	0	0	0	0	0	0	0	1	0	0	0	0		2
ZMYM2	1	0	1	0	0	0	0	0	0	0	0	0	0	0	0	0		2
AQR	1	0	0	0	0	0	0	1	0	0	0	0	0	0	0	0		2
RUNDC1	0	0	0	0	0	0	0	0	0	0	1	0	0	1	0	0		2
SESN1	1	0	0	0	0	0	0	1	0	0	0	0	0	0	0	0		2
LOC728555	0	0	0	0	0	0	0	0	0	0	1	0	0	1	0	0		2
PRKCD	1	0	0	0	0	1	0	0	0	0	0	0	0	0	0	0		2
NBPF12	0	0	1	0	0	0	0	0	0	0	0	1	0	0	0	0		2
NBPF14	0	0	1	0	0	0	0	0	0	0	0	1	0	0	0	0		2
C14orf143	1	0	0	0	0	0	0	0	0	0	0	0	0	0	0	1		2
KRT18P50	1	0	0	0	0	0	0	0	0	0	0	0	0	0	0	1		2
CCDC47	1	0	0	0	0	1	0	0	0	0	0	0	0	0	0	0		2
NEIL1	0	0	1	0	0	0	0	1	0	0	0	0	0	0	0	0		2
SEC31A	0	0	0	0	0	1	0	0	0	0	0	1	0	0	0	0		2
ID2	1	0	0	0	0	1	0	0	0	0	0	0	0	0	0	0		2
CROP	1	0	1	0	0	0	0	0	0	0	0	0	0	0	0	0		2
ATP6V1D	0	0	0	0	0	1	0	0	0	0	0	0	0	0	0	1		2
AMFR	1	0	0	0	0	0	0	0	0	0	0	0	0	0	0	1		2
DDR1	0	0	1	0	0	0	0	0	1	0	0	0	0	0	0	0		2
CBR4	0	0	0	0	0	0	0	1	0	1	0	0	0	0	0	0		2
C16orf58	1	0	0	0	0	0	0	0	0	0	0	1	0	0	0	0		2
APPBP2	0	0	0	0	0	0	0	0	0	0	0	1	0	0	0	1		2
CLCN6	0	0	0	1	1	0	0	0	0	0	0	0	0	0	0	0		2
IMPDH2	0	0	0	0	0	1	0	1	0	0	0	0	0	0	0	0		2
UBXD1	0	0	1	0	0	0	0	1	0	0	0	0	0	0	0	0		2
PNRC2	0	0	0	0	0	0	0	1	0	0	0	0	0	0	0	1		2
ARL8B	0	0	0	1	1	0	0	0	0	0	0	0	0	0	0	0		2
WDR26	0	0	0	0	0	1	0	0	0	0	0	1	0	0	0	0		2
MGC5370	1	0	0	0	0	0	0	0	0	0	0	0	0	0	0	1		2
TCEB2	1	0	0	0	0	0	0	1	0	0	0	0	0	0	0	0		2
TRIM52	0	0	1	0	0	1	0	0	0	0	0	0	0	0	0	0		2
C16orf33	1	0	0	0	0	0	0	1	0	0	0	0	0	0	0	0		2
SH3BP5	1	0	0	0	0	0	0	0	0	0	0	1	0	0	0	0		2
COX7C	0	0	0	0	0	0	0	1	0	0	0	0	0	0	0	1		2
TMEM66	0	0	0	0	0	0	0	0	0	0	0	1	0	0	0	1		2
PYCARD	1	0	1	0	0	0	0	0	0	0	0	0	0	0	0	0		2
WWOX	1	0	0	0	0	1	0	0	0	0	0	0	0	0	0	0		2
DIO1	1	0	0	0	0	1	0	0	0	0	0	0	0	0	0	0		2
FLJ21963	0	0	0	0	0	1	0	0	0	0	0	1	0	0	0	0		2
GBL	1	0	0	0	0	0	0	1	0	0	0	0	0	0	0	0		2
CISD3	0	0	0	0	0	1	0	0	0	0	0	1	0	0	0	0		2
NUP210	1	0	1	0	0	0	0	0	0	0	0	0	0	0	0	0		2
EIF2AK3	1	0	0	0	0	1	0	0	0	0	0	0	0	0	0	0		2
SLC7A2	0	0	0	0	0	0	0	0	0	0	1	0	0	1	0	0		2
GPR137B	1	0	0	0	0	1	0	0	0	0	0	0	0	0	0	0		2
PALM	0	0	1	0	0	0	0	1	0	0	0	0	0	0	0	0		2
RNASET2	1	0	0	0	0	1	0	0	0	0	0	0	0	0	0	0		2
PCGF2	1	0	0	0	0	1	0	0	0	0	0	0	0	0	0	0		2
FAM130A1	0	0	1	0	0	0	0	0	0	0	0	1	0	0	0	0		2
SOS2	1	0	0	0	0	1	0	0	0	0	0	0	0	0	0	0		2
LOC441453	1	0	0	0	0	1	0	0	0	0	0	0	0	0	0	0		2
MOSC2	0	0	1	0	0	0	0	0	0	1	0	0	0	0	0	0		2
JUND	1	0	0	0	0	0	0	1	0	0	0	0	0	0	0	0		2
HOOK2	1	0	1	0	0	0	0	0	0	0	0	0	0	0	0	0		2
FRS2	1	0	0	0	0	0	0	0	0	0	0	0	0	1	0	0		2
NDUFA10	0	0	0	1	1	0	0	0	0	0	0	0	0	0	0	0		2
QDPR	0	0	0	0	0	0	0	1	0	0	0	0	0	0	1	0		2
CLCN3	0	0	0	0	0	1	0	1	0	0	0	0	0	0	0	0		2
PPM1H	1	0	0	0	0	1	0	0	0	0	0	0	0	0	0	0		2
C18orf1	0	0	1	0	0	0	0	0	0	0	0	1	0	0	0	0		2
COMT	1	0	0	0	0	1	0	0	0	0	0	0	0	0	0	0		2
GMPR2	0	0	0	0	0	1	0	1	0	0	0	0	0	0	0	0		2
TMEM134	1	0	1	0	0	0	0	0	0	0	0	0	0	0	0	0		2
KIAA0831	0	0	0	0	0	1	0	0	0	0	0	1	0	0	0	0		2
HNRPH2	0	0	0	0	0	0	1	1	0	0	0	0	0	0	0	0		2
CYP2J2	1	0	0	0	0	1	0	0	0	0	0	0	0	0	0	0		2
SERINC1	0	0	0	0	0	1	0	0	0	0	0	1	0	0	0	0		2
ZFYVE16	0	0	0	0	0	0	0	0	0	0	1	0	0	1	0	0		2
FRYL	0	0	0	0	0	0	0	0	0	0	1	0	0	0	0	1		2
GAK	1	0	1	0	0	0	0	0	0	0	0	0	0	0	0	0		2
ANKRD10	0	0	1	0	0	1	0	0	0	0	0	0	0	0	0	0		2
CRY2	0	0	0	0	0	0	0	1	0	0	0	0	0	0	0	1		2
KMO	1	0	0	0	0	0	0	0	0	1	0	0	0	0	0	0		2
CYFIP1	1	0	0	0	0	1	0	0	0	0	0	0	0	0	0	0		2
ZNF516	0	0	0	0	0	0	0	1	0	0	0	0	0	0	1	0		2
PRKCH	1	0	0	0	0	1	0	0	0	0	0	0	0	0	0	0		2
CACNG4	1	0	1	0	0	0	0	0	0	0	0	0	0	0	0	0		2
CPNE3	1	0	0	0	0	0	0	0	1	0	0	0	0	0	0	0		2
GABBR1	0	0	0	0	0	0	0	0	0	0	0	1	0	0	1	0		2
NEK1	0	0	0	0	0	0	0	0	0	0	0	0	0	1	0	1		2
REEP6	0	0	0	0	0	0	0	0	0	0	1	0	0	1	0	0		2
PPM1A	1	0	0	0	0	0	0	0	0	0	0	1	0	0	0	0		2
C14orf124	1	0	0	0	0	0	0	0	0	0	0	1	0	0	0	0		2
COMMD3	1	0	0	0	0	0	0	0	0	0	0	1	0	0	0	0		2
ZNF710	1	0	0	0	0	1	0	0	0	0	0	0	0	0	0	0		2
PPT1	0	0	0	0	0	1	0	0	0	0	0	1	0	0	0	0		2
BSPRY	1	0	1	0	0	0	0	0	0	0	0	0	0	0	0	0		2
PREX1	0	0	0	0	0	0	0	0	0	0	1	0	0	1	0	0		2
PRKAG1	1	0	0	0	0	0	0	1	0	0	0	0	0	0	0	0		2
PKP2	1	0	0	0	0	1	0	0	0	0	0	0	0	0	0	0		2
PRCC	1	0	0	0	0	0	0	0	0	0	0	1	0	0	0	0		2
PLEKHA6	0	0	1	0	0	0	0	0	0	0	0	0	0	1	0	0		2
SPSB3	1	0	1	0	0	0	0	0	0	0	0	0	0	0	0	0		2
ABHD2	0	0	0	0	0	0	0	1	0	0	0	0	0	1	0	0		2
TMEM5	0	0	0	0	0	1	0	0	0	0	0	0	0	0	0	1		2
FIS1	0	0	0	0	0	1	0	1	0	0	0	0	0	0	0	0		2
GUSBP1	0	0	0	0	0	0	0	0	0	0	1	1	0	0	0	0		2
HSD17B7	0	0	1	0	0	0	1	0	0	0	0	0	0	0	0	0		2
LOC727942	1	0	1	0	0	0	0	0	0	0	0	0	0	0	0	0		2
LCMT2	0	0	0	0	0	0	0	1	0	0	0	0	0	0	0	1		2
FHIT	1	0	0	0	0	1	0	0	0	0	0	0	0	0	0	0		2
ARID4B	0	0	1	0	0	0	0	0	0	0	0	1	0	0	0	0		2
LFNG	1	0	0	0	0	0	0	0	0	0	1	0	0	0	0	0		2
TRAFD1	1	0	0	0	0	1	0	0	0	0	0	0	0	0	0	0		2
RMND1	1	0	0	0	0	1	0	0	0	0	0	0	0	0	0	0		2
KIAA0174	0	0	1	0	0	1	0	0	0	0	0	0	0	0	0	0		2
UBE2B	0	0	0	0	0	0	0	1	0	0	0	0	0	0	0	1		2
SNAP23	0	0	0	0	0	1	0	0	0	1	0	0	0	0	0	0		2
HCFC1R1	0	0	0	0	0	0	0	1	0	0	0	1	0	0	0	0		2
MFSD7	1	0	0	0	0	0	0	0	0	0	0	0	0	0	0	1		2
KIAA0196	1	0	0	0	0	1	0	0	0	0	0	0	0	0	0	0		2
UNC119B	0	0	0	1	1	0	0	0	0	0	0	0	0	0	0	0		2
LARGE	1	0	1	0	0	0	0	0	0	0	0	0	0	0	0	0		2
GDPD3	1	0	0	0	0	1	0	0	0	0	0	0	0	0	0	0		2
GLTSCR2	0	0	1	0	0	0	0	1	0	0	0	0	0	0	0	0		2
IGFBP5	1	0	1	0	0	0	0	0	0	0	0	0	0	0	0	0		2
LOC440335	0	1	0	0	0	0	0	0	0	0	0	0	0	1	0	0		2
ERLIN2	0	0	0	0	0	0	0	1	0	0	0	0	0	0	0	1		2
YIPF6	0	0	0	0	0	0	0	0	0	0	0	0	0	1	1	0		2
GATAD1	0	0	1	0	0	0	1	0	0	0	0	0	0	0	0	0		2
QARS	0	0	0	0	0	1	0	1	0	0	0	0	0	0	0	0		2
PPM1B	1	0	1	0	0	0	0	0	0	0	0	0	0	0	0	0		2
RAP1GAP	1	0	0	0	0	1	0	0	0	0	0	0	0	0	0	0		2
FLJ14154	1	0	0	0	0	0	0	1	0	0	0	0	0	0	0	0		2
KIAA0265	0	0	0	1	1	0	0	0	0	0	0	0	0	0	0	0		2
KIAA0776	1	0	0	0	0	1	0	0	0	0	0	0	0	0	0	0		2
HSPA1A	0	0	1	0	0	0	0	0	0	0	0	1	0	0	0	0		2
DHPS	0	0	0	0	0	1	0	1	0	0	0	0	0	0	0	0		2
GPX4	0	0	0	0	0	0	0	1	0	0	0	1	0	0	0	0		2
SHC2	0	0	1	0	0	0	0	0	0	0	0	1	0	0	0	0		2
PAK2	1	0	0	0	0	1	0	0	0	0	0	0	0	0	0	0		2
ZNF580	0	0	0	0	0	0	1	0	0	0	0	1	0	0	0	0		2
COMMD10	0	0	0	0	0	0	0	1	0	0	0	0	0	0	0	1		2
C1QTNF3	1	0	0	0	0	1	0	0	0	0	0	0	0	0	0	0		2
RFX5	1	0	0	0	0	1	0	0	0	0	0	0	0	0	0	0		2
EEF1A2	0	0	0	0	0	0	0	1	0	0	0	1	0	0	0	0		2
EXOC7	0	0	1	0	0	0	0	0	0	0	0	1	0	0	0	0		2
PI4KB	1	0	0	0	0	0	0	0	0	0	0	1	0	0	0	0		2
SULT1A3	1	0	1	0	0	0	0	0	0	0	0	0	0	0	0	0		2
TROVE2	1	0	0	0	0	0	0	0	0	0	0	1	0	0	0	0		2
ZFYVE21	1	0	0	0	0	0	0	1	0	0	0	0	0	0	0	0		2
PDXDC1	1	0	1	0	0	0	0	0	0	0	0	0	0	0	0	0		2
RAB25	0	0	1	0	0	1	0	0	0	0	0	0	0	0	0	0		2
BAZ2B	0	0	1	0	0	0	0	0	0	0	0	0	0	0	0	1		2
GNAS	1	0	0	0	0	0	0	0	0	0	0	1	0	0	0	0		2
RAD50	0	0	0	0	0	0	0	1	0	0	0	0	0	0	1	0		2
RABL4	1	0	0	0	0	0	0	0	0	0	0	1	0	0	0	0		2
ZNF692	0	0	1	0	0	0	0	0	0	0	0	1	0	0	0	0		2
ABHD11	1	0	1	0	0	0	0	0	0	0	0	0	0	0	0	0		2
COX6C	0	0	0	0	0	0	0	1	0	0	0	0	0	0	1	0		2
C14orf179	0	0	0	0	0	0	0	0	0	0	1	0	0	1	0	0		2
SLC37A1	1	0	1	0	0	0	0	0	0	0	0	0	0	0	0	0		2
RABGAP1	1	0	0	0	0	1	0	0	0	0	0	0	0	0	0	0		2
RNF10	0	0	0	0	0	0	0	0	0	1	0	0	0	0	0	1		2
TRAK2	0	0	0	0	0	0	0	0	0	1	0	0	0	0	0	1		2
TERF2IP	0	0	0	0	0	1	0	0	0	0	0	1	0	0	0	0		2
CEP68	0	0	1	0	0	0	0	1	0	0	0	0	0	0	0	0		2
GGT1	1	0	0	0	0	1	0	0	0	0	0	0	0	0	0	0		2
NAPA	0	0	0	0	0	0	0	1	0	0	0	1	0	0	0	0		2
COX7CP1	0	0	0	0	0	1	0	1	0	0	0	0	0	0	0	0		2
PYROXD1	1	0	0	0	0	1	0	0	0	0	0	0	0	0	0	0		2
NVL	0	0	0	0	0	1	0	0	0	0	0	1	0	0	0	0		2
ZDHHC17	0	0	0	0	0	0	0	0	0	0	0	1	0	0	0	1		2
RORC	1	0	0	0	0	1	0	0	0	0	0	0	0	0	0	0		2
COX6A1	1	0	0	0	0	0	0	1	0	0	0	0	0	0	0	0		2
EGLN2	1	0	0	0	0	0	0	1	0	0	0	0	0	0	0	0		2
CLK2	0	0	1	0	0	0	0	0	0	0	0	1	0	0	0	0		2
COBL	1	0	0	0	0	1	0	0	0	0	0	0	0	0	0	0		2
PDCD6IP	0	0	0	0	0	1	0	0	0	0	0	0	0	1	0	0		2
ETFA	1	0	0	0	0	1	0	0	0	0	0	0	0	0	0	0		2
POGZ	0	0	1	0	0	0	0	0	0	0	0	1	0	0	0	0		2
PRRG2	0	0	0	0	0	0	0	1	0	0	0	0	0	0	0	1		2
CHMP5	0	0	0	0	0	1	0	1	0	0	0	0	0	0	0	0		2
RNF11	0	0	0	0	0	1	0	0	0	0	0	1	0	0	0	0		2
PNMA1	0	0	0	0	0	0	0	0	0	0	0	1	0	0	0	1		2
RAB22A	1	0	0	0	0	0	0	0	0	0	0	0	0	0	0	1		2
TOB2	1	0	0	0	0	1	0	0	0	0	0	0	0	0	0	0		2
POLR3E	1	0	1	0	0	0	0	0	0	0	0	0	0	0	0	0		2
GPX2	0	0	0	0	0	0	0	0	0	0	0	0	0	0	0	1		1
CD2AP	0	0	0	0	0	1	0	0	0	0	0	0	0	0	0	0		1
RCHY1	1	0	0	0	0	0	0	0	0	0	0	0	0	0	0	0		1
BCKDHB	0	0	0	0	0	1	0	0	0	0	0	0	0	0	0	0		1
ATP7A	0	0	0	0	0	1	0	0	0	0	0	0	0	0	0	0		1
RUSC1	1	0	0	0	0	0	0	0	0	0	0	0	0	0	0	0		1
FCGRT	0	0	1	0	0	0	0	0	0	0	0	0	0	0	0	0		1
HD	0	0	0	0	0	0	0	0	0	0	0	0	0	0	0	1		1
LOC440295	0	0	1	0	0	0	0	0	0	0	0	0	0	0	0	0		1
FLJ20489	1	0	0	0	0	0	0	0	0	0	0	0	0	0	0	0		1
C11orf35	0	0	0	0	0	0	0	0	0	0	0	0	0	1	0	0		1
IL1R1	0	0	0	0	0	1	0	0	0	0	0	0	0	0	0	0		1
FBXL2	0	0	0	0	0	0	0	0	0	0	0	1	0	0	0	0		1
DDEFL1	0	0	0	0	0	0	0	0	0	0	0	1	0	0	0	0		1
FLJ21865	0	0	1	0	0	0	0	0	0	0	0	0	0	0	0	0		1
HIGD1B	0	0	0	0	0	0	0	0	0	0	0	0	0	0	0	1		1
C16orf52	0	0	0	0	0	0	0	0	0	0	0	0	0	1	0	0		1
ATP5D	0	0	0	0	0	0	0	1	0	0	0	0	0	0	0	0		1
TRMT12	0	0	1	0	0	0	0	0	0	0	0	0	0	0	0	0		1
HIST1H2BH	0	0	0	0	0	1	0	0	0	0	0	0	0	0	0	0		1
HDAC11	0	0	0	0	0	0	0	1	0	0	0	0	0	0	0	0		1
FBXW7	1	0	0	0	0	0	0	0	0	0	0	0	0	0	0	0		1
ZNF665	0	0	0	0	0	1	0	0	0	0	0	0	0	0	0	0		1
LOC388237	0	0	1	0	0	0	0	0	0	0	0	0	0	0	0	0		1
RECQL5	1	0	0	0	0	0	0	0	0	0	0	0	0	0	0	0		1
ITIH2	1	0	0	0	0	0	0	0	0	0	0	0	0	0	0	0		1
FLJ11292	0	0	0	0	0	0	0	0	0	0	0	0	0	1	0	0		1
AHI1	0	0	1	0	0	0	0	0	0	0	0	0	0	0	0	0		1
NR1I3	1	0	0	0	0	0	0	0	0	0	0	0	0	0	0	0		1
FAM108A1	0	0	0	0	0	0	0	1	0	0	0	0	0	0	0	0		1
ABHD5	1	0	0	0	0	0	0	0	0	0	0	0	0	0	0	0		1
RANBP9	0	0	0	0	0	1	0	0	0	0	0	0	0	0	0	0		1
BACE1	0	0	0	0	0	1	0	0	0	0	0	0	0	0	0	0		1
GCHFR	1	0	0	0	0	0	0	0	0	0	0	0	0	0	0	0		1
C9orf61	0	0	0	0	0	0	0	0	0	0	0	1	0	0	0	0		1
FLJ10154	0	0	1	0	0	0	0	0	0	0	0	0	0	0	0	0		1
BCAR3	0	0	0	0	0	1	0	0	0	0	0	0	0	0	0	0		1
LOC552889	1	0	0	0	0	0	0	0	0	0	0	0	0	0	0	0		1
HSD17B14	0	0	0	0	0	0	0	0	0	0	0	1	0	0	0	0		1
NSUN5B	0	0	1	0	0	0	0	0	0	0	0	0	0	0	0	0		1
ATRN	0	0	0	0	0	0	0	0	0	0	0	1	0	0	0	0		1
GOLGA4	0	0	0	0	0	1	0	0	0	0	0	0	0	0	0	0		1
ZFP36	1	0	0	0	0	0	0	0	0	0	0	0	0	0	0	0		1
FLJ35348	0	0	0	0	0	1	0	0	0	0	0	0	0	0	0	0		1
FLJ30851	0	0	0	0	0	0	0	0	0	0	0	0	0	1	0	0		1
RAB40B	1	0	0	0	0	0	0	0	0	0	0	0	0	0	0	0		1
H3F3A	0	0	1	0	0	0	0	0	0	0	0	0	0	0	0	0		1
SPEN	0	0	1	0	0	0	0	0	0	0	0	0	0	0	0	0		1
FOXP1	0	0	0	0	0	0	0	0	0	0	1	0	0	0	0	0		1
GPHN	1	0	0	0	0	0	0	0	0	0	0	0	0	0	0	0		1
STAT5B	0	0	1	0	0	0	0	0	0	0	0	0	0	0	0	0		1
ATP6V0C	0	0	0	0	0	0	0	1	0	0	0	0	0	0	0	0		1
MYCN	1	0	0	0	0	0	0	0	0	0	0	0	0	0	0	0		1
CSTA	0	0	0	0	0	1	0	0	0	0	0	0	0	0	0	0		1
FLJ38379	0	0	0	0	0	0	0	0	0	0	0	0	0	1	0	0		1
NUCB2	0	0	0	0	0	0	0	0	0	0	0	1	0	0	0	0		1
GKAP1	0	0	0	0	0	0	0	0	0	0	0	0	0	1	0	0		1
TAF9B	0	0	0	0	0	0	0	0	0	0	0	1	0	0	0	0		1
RGS11	0	0	0	0	0	0	0	0	0	0	0	0	0	1	0	0		1
FRAG1	1	0	0	0	0	0	0	0	0	0	0	0	0	0	0	0		1
GRHPR	0	0	0	0	0	1	0	0	0	0	0	0	0	0	0	0		1
SRP54	0	0	0	0	0	0	0	0	0	0	0	1	0	0	0	0		1
LAMA4	1	0	0	0	0	0	0	0	0	0	0	0	0	0	0	0		1
FNIP1	0	0	0	0	0	0	0	0	0	0	0	0	0	1	0	0		1
PRDM2	0	0	1	0	0	0	0	0	0	0	0	0	0	0	0	0		1
KCNH2	1	0	0	0	0	0	0	0	0	0	0	0	0	0	0	0		1
RAE1	1	0	0	0	0	0	0	0	0	0	0	0	0	0	0	0		1
HSF4	0	0	1	0	0	0	0	0	0	0	0	0	0	0	0	0		1
F8A1	0	0	0	0	0	1	0	0	0	0	0	0	0	0	0	0		1
C8orf55	1	0	0	0	0	0	0	0	0	0	0	0	0	0	0	0		1
HADH	1	0	0	0	0	0	0	0	0	0	0	0	0	0	0	0		1
BAG5	1	0	0	0	0	0	0	0	0	0	0	0	0	0	0	0		1
ABCC11	0	0	0	0	0	0	0	0	0	0	1	0	0	0	0	0		1
ING4	0	0	0	0	0	1	0	0	0	0	0	0	0	0	0	0		1
FCER1A	1	0	0	0	0	0	0	0	0	0	0	0	0	0	0	0		1
ABCB9	1	0	0	0	0	0	0	0	0	0	0	0	0	0	0	0		1
SLC38A6	0	0	0	0	0	0	0	0	0	0	0	1	0	0	0	0		1
UBXD3	0	0	0	0	0	0	0	0	0	0	0	0	0	1	0	0		1
SLC16A5	0	0	0	0	0	0	0	0	0	0	0	0	0	0	0	1		1
LOC492311	0	0	0	0	0	0	0	0	0	0	0	0	0	1	0	0		1
LIG3	1	0	0	0	0	0	0	0	0	0	0	0	0	0	0	0		1
GCH1	1	0	0	0	0	0	0	0	0	0	0	0	0	0	0	0		1
CSTF2T	1	0	0	0	0	0	0	0	0	0	0	0	0	0	0	0		1
FGF13	0	0	0	0	0	0	0	0	0	0	0	1	0	0	0	0		1
IK	0	0	0	0	0	0	0	0	0	0	0	0	0	0	0	1		1
ABCA2	1	0	0	0	0	0	0	0	0	0	0	0	0	0	0	0		1
SFRS6	0	0	0	0	0	0	0	0	0	0	0	0	0	0	1	0		1
ATP6V0A4	0	0	0	0	0	1	0	0	0	0	0	0	0	0	0	0		1
CREBBP	0	0	1	0	0	0	0	0	0	0	0	0	0	0	0	0		1
LYK5	0	0	0	0	0	0	0	0	0	0	0	1	0	0	0	0		1
ATP6AP2	0	0	0	0	0	0	0	0	0	0	0	1	0	0	0	0		1
ATP5S	0	0	0	0	0	1	0	0	0	0	0	0	0	0	0	0		1
MGC3260	0	0	0	0	0	1	0	0	0	0	0	0	0	0	0	0		1
FLJ45983	0	0	0	0	0	0	0	0	0	0	0	0	0	1	0	0		1
HLA-DRB4	0	0	0	0	0	1	0	0	0	0	0	0	0	0	0	0		1
FCHO2	0	0	0	0	0	0	0	0	0	0	1	0	0	0	0	0		1
TCF7L2	0	0	0	0	0	1	0	0	0	0	0	0	0	0	0	0		1
FEM1C	0	0	0	0	0	0	0	0	0	1	0	0	0	0	0	0		1
HERC2P2	0	0	1	0	0	0	0	0	0	0	0	0	0	0	0	0		1
KIAA0828	0	0	0	0	0	1	0	0	0	0	0	0	0	0	0	0		1
ZFX	0	0	0	0	0	0	0	0	0	0	0	0	0	1	0	0		1
C15orf44	1	0	0	0	0	0	0	0	0	0	0	0	0	0	0	0		1
LOC791120	0	0	1	0	0	0	0	0	0	0	0	0	0	0	0	0		1
C14orf2	1	0	0	0	0	0	0	0	0	0	0	0	0	0	0	0		1
RXRB	0	0	0	0	0	0	0	0	0	0	0	0	0	0	1	0		1
C10orf95	0	0	0	0	0	1	0	0	0	0	0	0	0	0	0	0		1
PHF6	0	0	0	0	0	1	0	0	0	0	0	0	0	0	0	0		1
LDB1	1	0	0	0	0	0	0	0	0	0	0	0	0	0	0	0		1
VPS52	1	0	0	0	0	0	0	0	0	0	0	0	0	0	0	0		1
GNB5	0	0	0	0	0	0	0	0	0	0	0	0	0	0	0	1		1
TMEM4	1	0	0	0	0	0	0	0	0	0	0	0	0	0	0	0		1
NXF1	0	0	0	0	0	0	0	0	0	0	0	1	0	0	0	0		1
SMAD5	0	0	0	0	0	0	0	0	0	0	0	0	0	1	0	0		1
DDX5	0	0	0	0	0	0	0	0	0	0	0	1	0	0	0	0		1
COPS2	0	0	0	0	0	1	0	0	0	0	0	0	0	0	0	0		1
BCAS4	0	0	0	0	0	0	0	1	0	0	0	0	0	0	0	0		1
LYPLA1	0	0	0	0	0	1	0	0	0	0	0	0	0	0	0	0		1
PGR	0	0	0	0	0	0	0	1	0	0	0	0	0	0	0	0		1
CBX6	0	0	0	0	0	1	0	0	0	0	0	0	0	0	0	0		1
PCP2	0	0	0	0	0	0	0	0	0	0	0	0	0	1	0	0		1
PEBP1	1	0	0	0	0	0	0	0	0	0	0	0	0	0	0	0		1
BCL3	0	0	0	0	0	1	0	0	0	0	0	0	0	0	0	0		1
EYA2	0	0	0	0	0	0	0	0	0	0	0	1	0	0	0	0		1
CENTG2	1	0	0	0	0	0	0	0	0	0	0	0	0	0	0	0		1
SEPX1	1	0	0	0	0	0	0	0	0	0	0	0	0	0	0	0		1
CLMN	0	0	0	0	0	1	0	0	0	0	0	0	0	0	0	0		1
RASA4	0	0	1	0	0	0	0	0	0	0	0	0	0	0	0	0		1
ZNF415	0	0	0	0	0	0	0	0	0	0	0	1	0	0	0	0		1
NFATC3	1	0	0	0	0	0	0	0	0	0	0	0	0	0	0	0		1
PILRB	0	0	1	0	0	0	0	0	0	0	0	0	0	0	0	0		1
SCPEP1	0	0	0	0	0	0	0	0	0	0	0	1	0	0	0	0		1
ZNF287	0	0	0	0	0	0	0	0	0	0	0	0	0	0	0	1		1
IQCE	0	0	0	0	0	0	0	0	0	0	0	0	0	0	0	1		1
COPS4	0	0	0	0	0	0	0	1	0	0	0	0	0	0	0	0		1
PSKH1	1	0	0	0	0	0	0	0	0	0	0	0	0	0	0	0		1
NIBP	1	0	0	0	0	0	0	0	0	0	0	0	0	0	0	0		1
KBTBD4	0	0	0	0	0	0	0	0	0	0	0	0	0	0	0	1		1
TSPYL4	0	0	0	0	0	1	0	0	0	0	0	0	0	0	0	0		1
HERPUD1	0	0	0	0	0	1	0	0	0	0	0	0	0	0	0	0		1
RPS27	0	0	1	0	0	0	0	0	0	0	0	0	0	0	0	0		1
PLEKHF1	0	0	0	0	0	1	0	0	0	0	0	0	0	0	0	0		1
CAND1	1	0	0	0	0	0	0	0	0	0	0	0	0	0	0	0		1
MAN1A2	1	0	0	0	0	0	0	0	0	0	0	0	0	0	0	0		1
HDHD2	0	0	0	0	0	0	0	0	0	0	0	0	0	1	0	0		1
PPL	0	0	0	0	0	1	0	0	0	0	0	0	0	0	0	0		1
PLEKHA5	0	0	0	0	0	1	0	0	0	0	0	0	0	0	0	0		1
PSAP	0	0	0	0	0	0	0	0	0	0	0	1	0	0	0	0		1
PVRL3	0	0	0	0	0	1	0	0	0	0	0	0	0	0	0	0		1
C17orf75	0	0	0	0	0	0	0	0	0	0	0	0	0	0	1	0		1
SGPL1	1	0	0	0	0	0	0	0	0	0	0	0	0	0	0	0		1
UBXD5	0	0	0	0	0	0	0	0	0	0	0	0	0	1	0	0		1
TRAF4	1	0	0	0	0	0	0	0	0	0	0	0	0	0	0	0		1
PNRC1	0	0	0	0	0	1	0	0	0	0	0	0	0	0	0	0		1
ZNF629	1	0	0	0	0	0	0	0	0	0	0	0	0	0	0	0		1
TUSC3	0	0	0	0	0	0	0	0	0	0	0	1	0	0	0	0		1
TXNL4A	1	0	0	0	0	0	0	0	0	0	0	0	0	0	0	0		1
GTF3C2	1	0	0	0	0	0	0	0	0	0	0	0	0	0	0	0		1
INSIG2	0	0	0	0	0	1	0	0	0	0	0	0	0	0	0	0		1
SRGAP1	0	0	0	0	0	0	0	0	0	0	1	0	0	0	0	0		1
LOC285535	0	0	0	0	0	0	0	0	0	0	0	0	0	1	0	0		1
ACOX1	1	0	0	0	0	0	0	0	0	0	0	0	0	0	0	0		1
OAZ3	1	0	0	0	0	0	0	0	0	0	0	0	0	0	0	0		1
CDYL	0	0	0	0	0	1	0	0	0	0	0	0	0	0	0	0		1
RABL2B	0	0	1	0	0	0	0	0	0	0	0	0	0	0	0	0		1
PDGFD	0	0	0	0	0	0	0	0	0	0	0	0	0	0	0	1		1
CGREF1	1	0	0	0	0	0	0	0	0	0	0	0	0	0	0	0		1
ECM1	0	0	0	0	0	0	0	0	0	1	0	0	0	0	0	0		1
CASP8	0	0	0	0	0	0	0	0	0	1	0	0	0	0	0	0		1
CRADD	1	0	0	0	0	0	0	0	0	0	0	0	0	0	0	0		1
REPS1	0	0	1	0	0	0	0	0	0	0	0	0	0	0	0	0		1
CLEC1B	1	0	0	0	0	0	0	0	0	0	0	0	0	0	0	0		1
PXMP4	0	0	0	0	0	1	0	0	0	0	0	0	0	0	0	0		1
PSMD9	0	0	0	0	0	0	0	1	0	0	0	0	0	0	0	0		1
ZNF174	1	0	0	0	0	0	0	0	0	0	0	0	0	0	0	0		1
ZBTB1	0	0	0	0	0	1	0	0	0	0	0	0	0	0	0	0		1
NAG	1	0	0	0	0	0	0	0	0	0	0	0	0	0	0	0		1
KLHDC9	0	0	0	0	0	0	0	0	0	0	0	0	0	1	0	0		1
SERINC3	0	0	0	0	0	1	0	0	0	0	0	0	0	0	0	0		1
RGS16	1	0	0	0	0	0	0	0	0	0	0	0	0	0	0	0		1
DNAL1	0	0	0	0	0	0	0	0	0	0	0	0	0	1	0	0		1
ZNF214	0	0	0	0	0	0	0	0	0	0	0	0	0	0	0	1		1
SLC29A3	1	0	0	0	0	0	0	0	0	0	0	0	0	0	0	0		1
SNURF	0	0	1	0	0	0	0	0	0	0	0	0	0	0	0	0		1
TADA3L	0	0	0	0	0	1	0	0	0	0	0	0	0	0	0	0		1
PIK3R2	1	0	0	0	0	0	0	0	0	0	0	0	0	0	0	0		1
RAPGEF5	0	0	1	0	0	0	0	0	0	0	0	0	0	0	0	0		1
NCOA3	1	0	0	0	0	0	0	0	0	0	0	0	0	0	0	0		1
FLJ11235	0	0	0	0	0	1	0	0	0	0	0	0	0	0	0	0		1
CD97	0	0	0	0	0	1	0	0	0	0	0	0	0	0	0	0		1
TTC12	0	0	0	0	0	0	0	0	0	0	0	0	0	1	0	0		1
STRA13	1	0	0	0	0	0	0	0	0	0	0	0	0	0	0	0		1
RGPD5	0	0	1	0	0	0	0	0	0	0	0	0	0	0	0	0		1
NOLA2	0	0	0	0	0	0	0	1	0	0	0	0	0	0	0	0		1
CSTF1	1	0	0	0	0	0	0	0	0	0	0	0	0	0	0	0		1
SRRM2	0	0	1	0	0	0	0	0	0	0	0	0	0	0	0	0		1
PTENP1	0	0	0	0	0	1	0	0	0	0	0	0	0	0	0	0		1
HIST1H2AM	0	0	0	0	0	1	0	0	0	0	0	0	0	0	0	0		1
EIF3A	0	0	0	0	0	1	0	0	0	0	0	0	0	0	0	0		1
PFKFB2	1	0	0	0	0	0	0	0	0	0	0	0	0	0	0	0		1
DBI	1	0	0	0	0	0	0	0	0	0	0	0	0	0	0	0		1
KRAS	1	0	0	0	0	0	0	0	0	0	0	0	0	0	0	0		1
ARMCX2	0	0	0	0	0	0	0	0	0	0	0	1	0	0	0	0		1
PRODH	1	0	0	0	0	0	0	0	0	0	0	0	0	0	0	0		1
YIPF3	0	0	0	0	0	1	0	0	0	0	0	0	0	0	0	0		1
NME2	1	0	0	0	0	0	0	0	0	0	0	0	0	0	0	0		1
MAN2B1	0	0	0	0	0	1	0	0	0	0	0	0	0	0	0	0		1
BMP7	1	0	0	0	0	0	0	0	0	0	0	0	0	0	0	0		1
RSF1	0	0	1	0	0	0	0	0	0	0	0	0	0	0	0	0		1
HOMER2	0	0	0	0	0	0	0	0	0	0	0	1	0	0	0	0		1
FGFR2	1	0	0	0	0	0	0	0	0	0	0	0	0	0	0	0		1
IRX4	1	0	0	0	0	0	0	0	0	0	0	0	0	0	0	0		1
KLF15	1	0	0	0	0	0	0	0	0	0	0	0	0	0	0	0		1
RPS23	0	0	0	0	0	0	0	0	0	0	1	0	0	0	0	0		1
TMEM63C	0	0	0	0	0	0	0	0	0	0	1	0	0	0	0	0		1
C4orf34	0	0	0	0	0	0	0	0	0	0	1	0	0	0	0	0		1
RUNX1	0	0	0	0	0	0	0	0	0	0	0	0	0	0	1	0		1
FLJ10781	0	0	0	0	0	0	0	0	0	0	0	1	0	0	0	0		1
USP21	1	0	0	0	0	0	0	0	0	0	0	0	0	0	0	0		1
TAPT1	0	0	0	0	0	0	0	0	0	0	0	0	0	1	0	0		1
LOC153222	0	0	0	0	0	0	0	0	0	0	0	0	0	1	0	0		1
RP2	0	0	0	0	0	1	0	0	0	0	0	0	0	0	0	0		1
PGLS	0	0	0	0	0	1	0	0	0	0	0	0	0	0	0	0		1
DENND4B	1	0	0	0	0	0	0	0	0	0	0	0	0	0	0	0		1
ANKRD52	0	0	0	0	0	0	0	0	0	0	1	0	0	0	0	0		1
TMEM111	0	0	0	0	0	0	0	1	0	0	0	0	0	0	0	0		1
RAB6C	0	0	0	0	0	1	0	0	0	0	0	0	0	0	0	0		1
ASB13	0	0	0	0	0	0	0	1	0	0	0	0	0	0	0	0		1
RCBTB1	0	0	0	0	0	1	0	0	0	0	0	0	0	0	0	0		1
TST	1	0	0	0	0	0	0	0	0	0	0	0	0	0	0	0		1
EBF4	0	0	0	0	0	0	0	0	0	0	0	0	0	1	0	0		1
SYTL5	0	0	0	0	0	0	0	0	0	0	1	0	0	0	0	0		1
PICALM	0	0	0	0	0	1	0	0	0	0	0	0	0	0	0	0		1
GDI1	0	0	0	0	0	0	0	0	0	0	0	1	0	0	0	0		1
VAMP3	0	0	0	0	0	1	0	0	0	0	0	0	0	0	0	0		1
C19orf42	0	0	0	0	0	0	0	1	0	0	0	0	0	0	0	0		1
PLA2G4B	0	0	1	0	0	0	0	0	0	0	0	0	0	0	0	0		1
HK2	0	0	0	0	0	1	0	0	0	0	0	0	0	0	0	0		1
ZFYVE26	0	0	0	0	0	0	0	0	0	0	0	0	0	0	0	1		1
C1orf168	0	0	0	0	0	0	0	0	0	0	1	0	0	0	0	0		1
REL	0	0	1	0	0	0	0	0	0	0	0	0	0	0	0	0		1
CCDC41	0	0	0	0	0	1	0	0	0	0	0	0	0	0	0	0		1
MAOB	0	0	1	0	0	0	0	0	0	0	0	0	0	0	0	0		1
GPR98	0	0	0	0	0	0	0	0	0	0	1	0	0	0	0	0		1
KIAA0974	0	0	0	0	0	1	0	0	0	0	0	0	0	0	0	0		1
AKT1	1	0	0	0	0	0	0	0	0	0	0	0	0	0	0	0		1
NOMO2	1	0	0	0	0	0	0	0	0	0	0	0	0	0	0	0		1
HLF	1	0	0	0	0	0	0	0	0	0	0	0	0	0	0	0		1
PHC1	0	0	0	0	0	0	0	0	0	0	0	1	0	0	0	0		1
LRRC56	0	0	0	0	0	0	0	0	0	0	0	0	0	1	0	0		1
ABCB1	0	0	0	0	0	1	0	0	0	0	0	0	0	0	0	0		1
PPP6C	0	0	0	0	0	1	0	0	0	0	0	0	0	0	0	0		1
RCOR1	1	0	0	0	0	0	0	0	0	0	0	0	0	0	0	0		1
SUSD3	0	0	0	0	0	0	0	0	0	0	0	0	0	1	0	0		1
ATP6V1A	0	0	0	0	0	1	0	0	0	0	0	0	0	0	0	0		1
TXNDC15	0	0	0	0	0	0	0	0	0	0	0	0	0	1	0	0		1
SQLE	1	0	0	0	0	0	0	0	0	0	0	0	0	0	0	0		1
PCMT1	0	0	0	0	0	1	0	0	0	0	0	0	0	0	0	0		1
LAPTM4A	0	0	0	0	0	0	0	0	0	0	0	1	0	0	0	0		1
ARF6	1	0	0	0	0	0	0	0	0	0	0	0	0	0	0	0		1
PLCB1	0	0	0	0	0	1	0	0	0	0	0	0	0	0	0	0		1
DNM2	1	0	0	0	0	0	0	0	0	0	0	0	0	0	0	0		1
OPA1	1	0	0	0	0	0	0	0	0	0	0	0	0	0	0	0		1
PIK3C2A	0	0	0	0	0	1	0	0	0	0	0	0	0	0	0	0		1
KCTD15	1	0	0	0	0	0	0	0	0	0	0	0	0	0	0	0		1
MRPS35	1	0	0	0	0	0	0	0	0	0	0	0	0	0	0	0		1
SUMO2	0	0	0	0	0	1	0	0	0	0	0	0	0	0	0	0		1
F12	1	0	0	0	0	0	0	0	0	0	0	0	0	0	0	0		1
MANSC1	0	0	0	0	0	1	0	0	0	0	0	0	0	0	0	0		1
PPP1R13B	1	0	0	0	0	0	0	0	0	0	0	0	0	0	0	0		1
TTC23	0	0	0	0	0	1	0	0	0	0	0	0	0	0	0	0		1
SPHAR	0	0	0	0	0	1	0	0	0	0	0	0	0	0	0	0		1
PARP3	0	0	0	0	0	0	0	0	0	0	0	0	0	1	0	0		1
KIAA0391	1	0	0	0	0	0	0	0	0	0	0	0	0	0	0	0		1
LRRC50	1	0	0	0	0	0	0	0	0	0	0	0	0	0	0	0		1
C4orf31	0	0	0	0	0	0	0	0	0	1	0	0	0	0	0	0		1
MGLL	0	0	0	0	0	0	0	0	0	1	0	0	0	0	0	0		1
WDR5B	0	0	0	0	0	1	0	0	0	0	0	0	0	0	0	0		1
CALCOCO2	0	0	0	0	0	0	0	0	0	0	1	0	0	0	0	0		1
PIK3C3	0	0	0	0	0	0	0	0	0	0	0	0	0	1	0	0		1
IGFALS	1	0	0	0	0	0	0	0	0	0	0	0	0	0	0	0		1
FBXO3	0	0	0	0	0	1	0	0	0	0	0	0	0	0	0	0		1
SNX27	1	0	0	0	0	0	0	0	0	0	0	0	0	0	0	0		1
PLA2G2E	1	0	0	0	0	0	0	0	0	0	0	0	0	0	0	0		1
ARMCX1	0	0	0	0	0	0	0	0	0	0	0	1	0	0	0	0		1
DUSP2	0	0	0	0	0	1	0	0	0	0	0	0	0	0	0	0		1
LOC145842	0	0	0	0	0	0	0	0	0	0	0	0	0	1	0	0		1
THBS4	0	0	0	0	0	0	0	0	0	0	1	0	0	0	0	0		1
ARL17	1	0	0	0	0	0	0	0	0	0	0	0	0	0	0	0		1
ULK1	0	0	0	0	0	0	0	0	0	0	0	1	0	0	0	0		1
CEACAM6	0	0	1	0	0	0	0	0	0	0	0	0	0	0	0	0		1
RNF141	1	0	0	0	0	0	0	0	0	0	0	0	0	0	0	0		1
MLSTD1	0	0	0	0	0	1	0	0	0	0	0	0	0	0	0	0		1
PPP1R3D	1	0	0	0	0	0	0	0	0	0	0	0	0	0	0	0		1
FNBP4	0	0	1	0	0	0	0	0	0	0	0	0	0	0	0	0		1
ALDH3A2	0	0	0	0	0	0	0	1	0	0	0	0	0	0	0	0		1
SMAP1	0	0	0	0	0	1	0	0	0	0	0	0	0	0	0	0		1
UCRC	1	0	0	0	0	0	0	0	0	0	0	0	0	0	0	0		1
OXA1L	0	0	0	0	0	1	0	0	0	0	0	0	0	0	0	0		1
PLLP	0	0	0	0	0	1	0	0	0	0	0	0	0	0	0	0		1
PARP6	0	0	0	0	0	0	0	0	0	0	0	1	0	0	0	0		1
NDUFAF1	0	0	0	0	0	0	0	1	0	0	0	0	0	0	0	0		1
TAS2R14	1	0	0	0	0	0	0	0	0	0	0	0	0	0	0	0		1
MPI	0	0	0	0	0	1	0	0	0	0	0	0	0	0	0	0		1
PSMA2	1	0	0	0	0	0	0	0	0	0	0	0	0	0	0	0		1
FAM117A	0	0	0	0	0	0	0	0	0	0	0	1	0	0	0	0		1
SPINK4	1	0	0	0	0	0	0	0	0	0	0	0	0	0	0	0		1
FLJ44796	0	0	0	0	0	0	0	0	0	0	0	0	0	1	0	0		1
S100A13	1	0	0	0	0	0	0	0	0	0	0	0	0	0	0	0		1
HMG20A	0	0	0	0	0	1	0	0	0	0	0	0	0	0	0	0		1
ZNF335	1	0	0	0	0	0	0	0	0	0	0	0	0	0	0	0		1
PIK3CB	0	0	0	0	0	1	0	0	0	0	0	0	0	0	0	0		1
SIPA1L3	1	0	0	0	0	0	0	0	0	0	0	0	0	0	0	0		1
PIGB	0	0	0	0	0	0	0	1	0	0	0	0	0	0	0	0		1
EDEM3	0	0	0	0	0	0	0	0	0	0	0	0	1	0	0	0		1
LOC150759	0	0	1	0	0	0	0	0	0	0	0	0	0	0	0	0		1
CDC14A	1	0	0	0	0	0	0	0	0	0	0	0	0	0	0	0		1
LOC284352	1	0	0	0	0	0	0	0	0	0	0	0	0	0	0	0		1
SERPINB1	0	0	0	0	0	1	0	0	0	0	0	0	0	0	0	0		1
ZSCAN18	0	0	0	0	0	0	0	0	0	0	0	1	0	0	0	0		1
UBP1	0	0	0	0	0	1	0	0	0	0	0	0	0	0	0	0		1
SLC25A36	1	0	0	0	0	0	0	0	0	0	0	0	0	0	0	0		1
ST3GAL5	0	0	0	0	0	1	0	0	0	0	0	0	0	0	0	0		1
C1orf102	0	0	0	0	0	0	0	0	0	0	0	0	0	1	0	0		1
GTF2H1	0	0	0	0	0	1	0	0	0	0	0	0	0	0	0	0		1
BCKDHA	1	0	0	0	0	0	0	0	0	0	0	0	0	0	0	0		1
SEL1L	1	0	0	0	0	0	0	0	0	0	0	0	0	0	0	0		1
TMEM34	1	0	0	0	0	0	0	0	0	0	0	0	0	0	0	0		1
IDI1	1	0	0	0	0	0	0	0	0	0	0	0	0	0	0	0		1
NPIP	0	0	0	0	0	0	0	0	0	0	0	1	0	0	0	0		1
ZNF500	0	0	0	0	0	0	1	0	0	0	0	0	0	0	0	0		1
GSPT1	1	0	0	0	0	0	0	0	0	0	0	0	0	0	0	0		1
PPP4C	1	0	0	0	0	0	0	0	0	0	0	0	0	0	0	0		1
C11orf80	1	0	0	0	0	0	0	0	0	0	0	0	0	0	0	0		1
SEPP1	0	0	0	0	0	1	0	0	0	0	0	0	0	0	0	0		1
ZNF44	0	0	0	0	0	0	0	0	0	0	0	0	0	1	0	0		1
INHBB	1	0	0	0	0	0	0	0	0	0	0	0	0	0	0	0		1
CHD8	1	0	0	0	0	0	0	0	0	0	0	0	0	0	0	0		1
ATXN2	0	0	0	0	0	0	0	0	0	0	1	0	0	0	0	0		1
DNMT3A	1	0	0	0	0	0	0	0	0	0	0	0	0	0	0	0		1
TM9SF3	0	0	0	0	0	1	0	0	0	0	0	0	0	0	0	0		1
S100A6	0	0	0	0	0	1	0	0	0	0	0	0	0	0	0	0		1
UXT	0	0	0	0	0	0	0	1	0	0	0	0	0	0	0	0		1
PAAF1	0	0	0	0	0	0	0	0	0	0	0	0	0	0	0	1		1
ARMCX6	0	0	0	0	0	0	0	0	0	0	0	1	0	0	0	0		1
SARDH	1	0	0	0	0	0	0	0	0	0	0	0	0	0	0	0		1
ATG16L1	0	1	0	0	0	0	0	0	0	0	0	0	0	0	0	0		1
CNNM4	1	0	0	0	0	0	0	0	0	0	0	0	0	0	0	0		1
GFOD2	1	0	0	0	0	0	0	0	0	0	0	0	0	0	0	0		1
OGFR	0	0	0	0	0	1	0	0	0	0	0	0	0	0	0	0		1
WNK1	0	0	0	0	0	0	0	0	0	0	0	1	0	0	0	0		1
KLHL9	0	0	1	0	0	0	0	0	0	0	0	0	0	0	0	0		1
UBE2J1	0	0	0	0	0	1	0	0	0	0	0	0	0	0	0	0		1
C10orf118	1	0	0	0	0	0	0	0	0	0	0	0	0	0	0	0		1
C1orf25	0	0	0	0	0	0	0	0	0	0	0	0	0	1	0	0		1
FMOD	1	0	0	0	0	0	0	0	0	0	0	0	0	0	0	0		1
MORC3	0	0	0	0	0	1	0	0	0	0	0	0	0	0	0	0		1
IDH2	1	0	0	0	0	0	0	0	0	0	0	0	0	0	0	0		1
TMEM161B	0	0	0	0	0	0	0	0	0	0	0	0	0	1	0	0		1
YBX1	1	0	0	0	0	0	0	0	0	0	0	0	0	0	0	0		1
MICALL2	0	0	1	0	0	0	0	0	0	0	0	0	0	0	0	0		1
TANK	0	0	0	0	0	1	0	0	0	0	0	0	0	0	0	0		1
STAG2	0	0	0	0	0	1	0	0	0	0	0	0	0	0	0	0		1
UTY	0	0	0	0	0	0	0	0	0	0	0	0	0	0	0	1		1
PCDHA12	1	0	0	0	0	0	0	0	0	0	0	0	0	0	0	0		1
TASP1	1	0	0	0	0	0	0	0	0	0	0	0	0	0	0	0		1
RAB15	1	0	0	0	0	0	0	0	0	0	0	0	0	0	0	0		1
NBPF1	0	0	0	0	0	0	0	0	0	0	0	1	0	0	0	0		1
ZKSCAN1	1	0	0	0	0	0	0	0	0	0	0	0	0	0	0	0		1
CCDC96	0	0	0	0	0	0	0	0	0	0	0	0	0	1	0	0		1
UPF3A	0	0	0	0	0	0	0	0	0	0	0	0	0	0	1	0		1
KIAA1279	0	0	0	0	0	0	0	0	0	0	0	1	0	0	0	0		1
SRPK2	0	0	0	0	0	1	0	0	0	0	0	0	0	0	0	0		1
NADSYN1	1	0	0	0	0	0	0	0	0	0	0	0	0	0	0	0		1
NCAM2	0	0	0	0	0	1	0	0	0	0	0	0	0	0	0	0		1
DCTN2	0	0	0	0	0	0	0	0	0	1	0	0	0	0	0	0		1
POLR1D	0	0	0	0	0	1	0	0	0	0	0	0	0	0	0	0		1
EEF1D	0	0	0	0	0	1	0	0	0	0	0	0	0	0	0	0		1
N4BP1	1	0	0	0	0	0	0	0	0	0	0	0	0	0	0	0		1
PFKL	1	0	0	0	0	0	0	0	0	0	0	0	0	0	0	0		1
LOC285103	0	0	0	0	0	0	0	0	0	0	0	0	0	1	0	0		1
TMEM183A	1	0	0	0	0	0	0	0	0	0	0	0	0	0	0	0		1
LOC400960	0	0	0	0	0	0	0	0	0	0	0	0	0	1	0	0		1
UCKL1	0	0	0	0	0	1	0	0	0	0	0	0	0	0	0	0		1
KIF12	0	0	0	0	0	0	0	0	0	0	0	0	0	1	0	0		1
ZC3H14	0	0	0	0	0	0	1	0	0	0	0	0	0	0	0	0		1
LOC56757	0	0	0	0	0	0	0	0	0	0	0	0	0	1	0	0		1
LOC220594	0	0	0	0	0	0	0	0	0	0	0	1	0	0	0	0		1
C9orf152	0	0	0	0	0	0	0	0	0	0	1	0	0	0	0	0		1
PRRT2	0	0	0	0	0	0	0	0	0	0	0	0	0	1	0	0		1
TMEM28	1	0	0	0	0	0	0	0	0	0	0	0	0	0	0	0		1
ARFGEF2	0	0	0	0	0	1	0	0	0	0	0	0	0	0	0	0		1
GATM	0	0	1	0	0	0	0	0	0	0	0	0	0	0	0	0		1
IRF6	0	0	0	0	0	1	0	0	0	0	0	0	0	0	0	0		1
KIAA0649	0	0	0	0	0	0	0	0	0	0	0	0	0	1	0	0		1
CINP	1	0	0	0	0	0	0	0	0	0	0	0	0	0	0	0		1
BCL6	0	0	1	0	0	0	0	0	0	0	0	0	0	0	0	0		1
TJP1	1	0	0	0	0	0	0	0	0	0	0	0	0	0	0	0		1
LOC643367	0	0	0	0	0	0	0	0	0	0	1	0	0	0	0	0		1
LARP4	1	0	0	0	0	0	0	0	0	0	0	0	0	0	0	0		1
RPS5	0	0	0	0	0	0	0	1	0	0	0	0	0	0	0	0		1
LCMT1	1	0	0	0	0	0	0	0	0	0	0	0	0	0	0	0		1
LRP2	0	0	0	0	0	0	0	0	0	0	0	1	0	0	0	0		1
NKX2-1	0	0	0	0	0	1	0	0	0	0	0	0	0	0	0	0		1
LOC644450	0	0	0	0	0	1	0	0	0	0	0	0	0	0	0	0		1
PAIP2B	1	0	0	0	0	0	0	0	0	0	0	0	0	0	0	0		1
ISG20L2	1	0	0	0	0	0	0	0	0	0	0	0	0	0	0	0		1
CSPG5	1	0	0	0	0	0	0	0	0	0	0	0	0	0	0	0		1
LOC643224	1	0	0	0	0	0	0	0	0	0	0	0	0	0	0	0		1
TTC18	0	0	0	0	0	0	0	0	0	0	0	0	0	1	0	0		1
PEX7	1	0	0	0	0	0	0	0	0	0	0	0	0	0	0	0		1
LOC641903	0	0	0	0	0	1	0	0	0	0	0	0	0	0	0	0		1
MCCC1	0	0	0	0	0	1	0	0	0	0	0	0	0	0	0	0		1
LOC730051	0	0	0	0	0	0	0	0	0	0	0	0	0	1	0	0		1
PER1	0	0	0	0	0	0	0	0	0	0	0	0	0	0	0	1		1
LOC646762	0	0	0	0	0	0	0	0	0	0	0	0	0	1	0	0		1
LTF	0	0	1	0	0	0	0	0	0	0	0	0	0	0	0	0		1
C4orf19	1	0	0	0	0	0	0	0	0	0	0	0	0	0	0	0		1
LOC642741	0	0	0	0	0	0	0	1	0	0	0	0	0	0	0	0		1
LOC339047	0	0	0	0	0	0	0	0	0	0	0	1	0	0	0	0		1
BTBD2	1	0	0	0	0	0	0	0	0	0	0	0	0	0	0	0		1
TSPAN3	0	0	0	0	0	1	0	0	0	0	0	0	0	0	0	0		1
TOR1B	0	0	0	0	0	0	0	0	0	1	0	0	0	0	0	0		1
CHKA	1	0	0	0	0	0	0	0	0	0	0	0	0	0	0	0		1
TTC30A	0	0	0	0	0	0	0	0	0	0	0	0	0	0	0	1		1
TSN	1	0	0	0	0	0	0	0	0	0	0	0	0	0	0	0		1
TMEM1	1	0	0	0	0	0	0	0	0	0	0	0	0	0	0	0		1
TSFM	1	0	0	0	0	0	0	0	0	0	0	0	0	0	0	0		1
KIAA0100	1	0	0	0	0	0	0	0	0	0	0	0	0	0	0	0		1
MRPL34	0	0	0	0	0	0	0	1	0	0	0	0	0	0	0	0		1
COBLL1	0	0	0	0	0	1	0	0	0	0	0	0	0	0	0	0		1
DNAJB14	1	0	0	0	0	0	0	0	0	0	0	0	0	0	0	0		1
KREMEN2	1	0	0	0	0	0	0	0	0	0	0	0	0	0	0	0		1
MNX1	1	0	0	0	0	0	0	0	0	0	0	0	0	0	0	0		1
TOMM7	0	0	0	0	0	0	0	1	0	0	0	0	0	0	0	0		1
TSPYL5	0	0	0	0	0	0	0	0	0	0	0	1	0	0	0	0		1
P18SRP	0	0	0	0	0	0	0	0	0	0	0	0	0	1	0	0		1
TESC	1	0	0	0	0	0	0	0	0	0	0	0	0	0	0	0		1
TPTE	0	0	0	0	0	1	0	0	0	0	0	0	0	0	0	0		1
LOC257407	1	0	0	0	0	0	0	0	0	0	0	0	0	0	0	0		1
LY6G5C	0	0	0	0	0	1	0	0	0	0	0	0	0	0	0	0		1
TMEM80	0	0	0	0	0	1	0	0	0	0	0	0	0	0	0	0		1
C12orf52	1	0	0	0	0	0	0	0	0	0	0	0	0	0	0	0		1
SPANXC	0	0	0	0	0	1	0	0	0	0	0	0	0	0	0	0		1
TM9SF2	0	0	0	0	0	1	0	0	0	0	0	0	0	0	0	0		1
TM2D1	0	0	0	0	0	1	0	0	0	0	0	0	0	0	0	0		1
ZNF764	1	0	0	0	0	0	0	0	0	0	0	0	0	0	0	0		1
OMD	0	0	0	0	0	0	0	0	0	1	0	0	0	0	0	0		1
HIATL1	0	0	1	0	0	0	0	0	0	0	0	0	0	0	0	0		1
IVNS1ABP	0	0	0	0	0	1	0	0	0	0	0	0	0	0	0	0		1
TNKS	0	0	0	0	0	0	0	1	0	0	0	0	0	0	0	0		1
TMEM131	0	0	0	0	0	1	0	0	0	0	0	0	0	0	0	0		1
DHX40	0	0	0	0	0	0	0	0	0	0	0	1	0	0	0	0		1
TMEM106B	0	0	0	0	0	1	0	0	0	0	0	0	0	0	0	0		1
CPSF6	1	0	0	0	0	0	0	0	0	0	0	0	0	0	0	0		1
TMED3	1	0	0	0	0	0	0	0	0	0	0	0	0	0	0	0		1
APH1A	1	0	0	0	0	0	0	0	0	0	0	0	0	0	0	0		1
TLE1	0	0	0	0	0	1	0	0	0	0	0	0	0	0	0	0		1
LOC644096	1	0	0	0	0	0	0	0	0	0	0	0	0	0	0	0		1
RNF6	0	0	0	0	0	1	0	0	0	0	0	0	0	0	0	0		1
NR2F2	0	0	0	0	0	1	0	0	0	0	0	0	0	0	0	0		1
PRKCZ	1	0	0	0	0	0	0	0	0	0	0	0	0	0	0	0		1
LXN	0	0	0	0	0	1	0	0	0	0	0	0	0	0	0	0		1
LYN	0	0	0	0	0	1	0	0	0	0	0	0	0	0	0	0		1
METTL7A	1	0	0	0	0	0	0	0	0	0	0	0	0	0	0	0		1
LY6E	0	0	0	0	0	0	0	0	0	0	0	1	0	0	0	0		1
PLCL1	0	0	0	0	0	0	0	0	0	0	0	1	0	0	0	0		1
MACROD1	1	0	0	0	0	0	0	0	0	0	0	0	0	0	0	0		1
AKAP8L	0	0	0	0	0	0	0	0	0	0	0	1	0	0	0	0		1
NSF	0	0	0	0	0	1	0	0	0	0	0	0	0	0	0	0		1
CDC42SE1	1	0	0	0	0	0	0	0	0	0	0	0	0	0	0	0		1
ZNF468	1	0	0	0	0	0	0	0	0	0	0	0	0	0	0	0		1
ZBTB7A	1	0	0	0	0	0	0	0	0	0	0	0	0	0	0	0		1
TINP1	0	0	0	0	0	0	0	1	0	0	0	0	0	0	0	0		1
LOC133569	0	0	0	0	0	1	0	0	0	0	0	0	0	0	0	0		1
ZBTB16	0	0	0	0	0	0	0	1	0	0	0	0	0	0	0	0		1
MED6	0	0	1	0	0	0	0	0	0	0	0	0	0	0	0	0		1
MFSD1	0	0	0	0	0	1	0	0	0	0	0	0	0	0	0	0		1
MFSD5	0	0	0	0	0	0	0	1	0	0	0	0	0	0	0	0		1
MATN2	0	0	0	0	0	1	0	0	0	0	0	0	0	0	0	0		1
RAB7L1	0	0	0	0	0	1	0	0	0	0	0	0	0	0	0	0		1
SGMS1	0	0	0	0	0	1	0	0	0	0	0	0	0	0	0	0		1
SUHW4	0	0	0	0	0	0	0	0	0	0	0	0	0	1	0	0		1
LTA4H	0	0	0	0	0	1	0	0	0	0	0	0	0	0	0	0		1
CCNH	0	0	0	0	0	0	0	1	0	0	0	0	0	0	0	0		1
DCLK1	0	0	0	0	0	0	0	0	0	0	0	1	0	0	0	0		1
SPTAN1	0	0	1	0	0	0	0	0	0	0	0	0	0	0	0	0		1
MAFB	0	0	0	0	0	1	0	0	0	0	0	0	0	0	0	0		1
MAN1B1	0	0	0	0	0	1	0	0	0	0	0	0	0	0	0	0		1
STK16	0	0	0	0	0	0	0	1	0	0	0	0	0	0	0	0		1
PAX9	1	0	0	0	0	0	0	0	0	0	0	0	0	0	0	0		1
MAML3	0	0	0	0	0	0	0	0	0	0	1	0	0	0	0	0		1
MAN1A1	0	0	0	0	0	1	0	0	0	0	0	0	0	0	0	0		1
MOCS2	0	0	0	0	0	0	0	0	0	0	0	0	0	0	0	1		1
SC5DL	0	0	0	0	0	0	0	0	0	1	0	0	0	0	0	0		1
DSTN	0	0	0	0	0	1	0	0	0	0	0	0	0	0	0	0		1
LRRC1	0	0	0	0	0	1	0	0	0	0	0	0	0	0	0	0		1
TBC1D17	0	0	0	0	0	0	0	0	0	0	0	1	0	0	0	0		1
MAP3K7IP1	1	0	0	0	0	0	0	0	0	0	0	0	0	0	0	0		1
MAP2K5	1	0	0	0	0	0	0	0	0	0	0	0	0	0	0	0		1
SMARCD2	1	0	0	0	0	0	0	0	0	0	0	0	0	0	0	0		1
HAX1	1	0	0	0	0	0	0	0	0	0	0	0	0	0	0	0		1
ASH1L	1	0	0	0	0	0	0	0	0	0	0	0	0	0	0	0		1
HYPE	0	0	0	0	0	0	0	0	0	0	0	0	0	0	0	1		1
CPA3	0	0	0	0	0	0	0	0	0	0	0	1	0	0	0	0		1
SMG1	1	0	0	0	0	0	0	0	0	0	0	0	0	0	0	0		1
SLC25A16	1	0	0	0	0	0	0	0	0	0	0	0	0	0	0	0		1
LOC126075	0	0	0	0	0	0	0	0	0	0	0	0	0	1	0	0		1
ATP6V1F	0	0	0	0	0	1	0	0	0	0	0	0	0	0	0	0		1
LIMCH1	0	0	0	0	0	0	0	0	0	1	0	0	0	0	0	0		1
MDM2	1	0	0	0	0	0	0	0	0	0	0	0	0	0	0	0		1
THAP11	1	0	0	0	0	0	0	0	0	0	0	0	0	0	0	0		1
HRASLS2	0	0	0	0	0	1	0	0	0	0	0	0	0	0	0	0		1
DMTF1	0	0	1	0	0	0	0	0	0	0	0	0	0	0	0	0		1
ZFAND1	0	0	0	0	0	1	0	0	0	0	0	0	0	0	0	0		1
PACS2	1	0	0	0	0	0	0	0	0	0	0	0	0	0	0	0		1
KRT19P2	1	0	0	0	0	0	0	0	0	0	0	0	0	0	0	0		1
KRT5	0	0	0	0	0	0	0	0	0	0	0	1	0	0	0	0		1
LMBRD1	0	0	0	0	0	1	0	0	0	0	0	0	0	0	0	0		1
CYB5D1	0	0	0	0	0	0	0	0	0	0	0	0	0	1	0	0		1
KRT8P12	1	0	0	0	0	0	0	0	0	0	0	0	0	0	0	0		1
LAMA3	0	0	0	0	0	0	0	1	0	0	0	0	0	0	0	0		1
LNX1	0	0	0	0	0	0	0	0	0	0	0	0	0	1	0	0		1
DECR2	1	0	0	0	0	0	0	0	0	0	0	0	0	0	0	0		1
OXSM	1	0	0	0	0	0	0	0	0	0	0	0	0	0	0	0		1
MIPEP	1	0	0	0	0	0	0	0	0	0	0	0	0	0	0	0		1
EFNA3	1	0	0	0	0	0	0	0	0	0	0	0	0	0	0	0		1
MAPKAPK2	1	0	0	0	0	0	0	0	0	0	0	0	0	0	0	0		1
MASP1	0	0	0	0	0	0	0	1	0	0	0	0	0	0	0	0		1
MIR16	1	0	0	0	0	0	0	0	0	0	0	0	0	0	0	0		1
MAGI1	0	0	1	0	0	0	0	0	0	0	0	0	0	0	0	0		1
SRD5A2L	1	0	0	0	0	0	0	0	0	0	0	0	0	0	0	0		1
MGRN1	0	0	1	0	0	0	0	0	0	0	0	0	0	0	0	0		1
RPS29	1	0	0	0	0	0	0	0	0	0	0	0	0	0	0	0		1
MAZ	1	0	0	0	0	0	0	0	0	0	0	0	0	0	0	0		1
PPAP2B	0	0	0	0	0	1	0	0	0	0	0	0	0	0	0	0		1
SYF2	0	0	0	0	0	0	0	1	0	0	0	0	0	0	0	0		1
ZIM2	1	0	0	0	0	0	0	0	0	0	0	0	0	0	0	0		1
MBD6	0	1	0	0	0	0	0	0	0	0	0	0	0	0	0	0		1
2008-03-06	0	0	0	0	0	1	0	0	0	0	0	0	0	0	0	0		1
FLJ20920	1	0	0	0	0	0	0	0	0	0	0	0	0	0	0	0		1
UBQLN2	0	0	0	0	0	1	0	0	0	0	0	0	0	0	0	0		1
BCL2L1	0	0	0	0	0	1	0	0	0	0	0	0	0	0	0	0		1
MED23	0	0	0	0	0	1	0	0	0	0	0	0	0	0	0	0		1
CPEB3	1	0	0	0	0	0	0	0	0	0	0	0	0	0	0	0		1
ZNF74	0	0	0	0	0	1	0	0	0	0	0	0	0	0	0	0		1
ZNHIT3	0	0	0	0	0	0	0	1	0	0	0	0	0	0	0	0		1
EML5	0	0	0	0	0	0	0	0	0	0	0	0	0	0	0	1		1
SEPT7	0	0	0	0	0	0	0	0	0	0	0	0	0	0	0	1		1
NEURL	0	0	0	0	0	0	0	0	0	0	0	0	0	0	1	0		1
MRPL9	1	0	0	0	0	0	0	0	0	0	0	0	0	0	0	0		1
BRD3	1	0	0	0	0	0	0	0	0	0	0	0	0	0	0	0		1
PSD3	0	0	0	0	0	1	0	0	0	0	0	0	0	0	0	0		1
ZRSR2	0	0	1	0	0	0	0	0	0	0	0	0	0	0	0	0		1
ZNF91	0	0	1	0	0	0	0	0	0	0	0	0	0	0	0	0		1
ZNF263	0	0	0	0	0	0	0	1	0	0	0	0	0	0	0	0		1
ZNF302	0	0	0	0	0	0	0	0	0	0	0	1	0	0	0	0		1
KRT7	0	0	0	0	0	0	0	0	0	0	0	1	0	0	0	0		1
ERMAP	0	0	0	0	0	1	0	0	0	0	0	0	0	0	0	0		1
ZNF483	0	0	0	0	0	0	0	0	0	0	0	0	0	1	0	0		1
ZNF277P	0	0	0	0	0	1	0	0	0	0	0	0	0	0	0	0		1
FLJ22662	0	0	0	0	0	1	0	0	0	0	0	0	0	0	0	0		1
ZNF205	0	0	0	0	0	0	0	0	0	0	0	0	0	0	1	0		1
CHCHD5	0	0	0	0	0	0	0	0	0	0	0	0	0	1	0	0		1
BZW1	0	0	0	0	0	0	0	0	0	1	0	0	0	0	0	0		1
PIGC	1	0	0	0	0	0	0	0	0	0	0	0	0	0	0	0		1
WRB	0	0	0	0	0	0	0	0	0	0	0	1	0	0	0	0		1
CREB3L1	0	0	0	0	0	0	0	0	0	1	0	0	0	0	0	0		1
GAD2	1	0	0	0	0	0	0	0	0	0	0	0	0	0	0	0		1
ZBTB48	0	0	0	0	0	0	0	0	0	0	0	0	0	0	1	0		1
MGEA5	0	0	1	0	0	0	0	0	0	0	0	0	0	0	0	0		1
C9orf5	0	0	0	0	0	0	0	0	0	0	0	0	0	1	0	0		1
TBC1D8	0	0	0	0	0	0	0	0	0	0	0	1	0	0	0	0		1
CXCL14	0	0	1	0	0	0	0	0	0	0	0	0	0	0	0	0		1
WNK4	0	0	0	0	0	0	0	0	0	0	0	0	0	1	0	0		1
XTP3TPA	1	0	0	0	0	0	0	0	0	0	0	0	0	0	0	0		1
ZNF518	1	0	0	0	0	0	0	0	0	0	0	0	0	0	0	0		1
VTCN1	0	0	0	0	0	0	0	0	0	0	0	1	0	0	0	0		1
COX7A2L	0	0	0	0	0	1	0	0	0	0	0	0	0	0	0	0		1
ARID2	0	0	0	0	0	0	0	0	0	0	1	0	0	0	0	0		1
FARS2	0	0	0	0	0	0	0	0	0	0	0	0	0	0	0	1		1
ADORA3	0	0	0	0	0	0	0	0	0	0	0	1	0	0	0	0		1
WDR48	1	0	0	0	0	0	0	0	0	0	0	0	0	0	0	0		1
SMAD2	0	0	0	0	0	1	0	0	0	0	0	0	0	0	0	0		1
YY1	1	0	0	0	0	0	0	0	0	0	0	0	0	0	0	0		1
YY1AP1	0	0	0	0	0	0	0	0	0	0	0	1	0	0	0	0		1
LOC55565	1	0	0	0	0	0	0	0	0	0	0	0	0	0	0	0		1
TXNL1	0	0	0	0	0	1	0	0	0	0	0	0	0	0	0	0		1
NEO1	1	0	0	0	0	0	0	0	0	0	0	0	0	0	0	0		1
PRPF39	1	0	0	0	0	0	0	0	0	0	0	0	0	0	0	0		1
GALK2	0	0	0	0	0	1	0	0	0	0	0	0	0	0	0	0		1
TWIST1	0	0	0	0	0	1	0	0	0	0	0	0	0	0	0	0		1
UBC	0	0	0	0	0	0	0	0	0	0	0	0	0	0	0	1		1
UBXD2	1	0	0	0	0	0	0	0	0	0	0	0	0	0	0	0		1
GLI2	1	0	0	0	0	0	0	0	0	0	0	0	0	0	0	0		1
SLC29A2	1	0	0	0	0	0	0	0	0	0	0	0	0	0	0	0		1
WAPAL	0	0	1	0	0	0	0	0	0	0	0	0	0	0	0	0		1
TBCA	0	0	0	0	0	0	0	1	0	0	0	0	0	0	0	0		1
CAP2	0	0	0	0	0	0	0	0	0	0	0	1	0	0	0	0		1
WDR7	0	0	1	0	0	0	0	0	0	0	0	0	0	0	0	0		1
WHSC2	1	0	0	0	0	0	0	0	0	0	0	0	0	0	0	0		1
WDR21A	0	0	0	0	0	1	0	0	0	0	0	0	0	0	0	0		1
CBX2	1	0	0	0	0	0	0	0	0	0	0	0	0	0	0	0		1
VDP	0	0	0	0	0	1	0	0	0	0	0	0	0	0	0	0		1
C12orf29	1	0	0	0	0	0	0	0	0	0	0	0	0	0	0	0		1
BMP4	0	0	0	0	0	1	0	0	0	0	0	0	0	0	0	0		1
GLRX5	1	0	0	0	0	0	0	0	0	0	0	0	0	0	0	0		1
UQCRC2	0	0	0	0	0	1	0	0	0	0	0	0	0	0	0	0		1
ANKRD46	1	0	0	0	0	0	0	0	0	0	0	0	0	0	0	0		1
USP33	0	0	0	0	0	1	0	0	0	0	0	0	0	0	0	0		1
TOMM20	0	0	0	0	0	1	0	0	0	0	0	0	0	0	0	0		1
UBE2D1	1	0	0	0	0	0	0	0	0	0	0	0	0	0	0	0		1
ZNF32	0	0	0	0	0	1	0	0	0	0	0	0	0	0	0	0		1
ZNF419	0	0	0	0	0	0	0	0	0	0	0	1	0	0	0	0		1
FAM115A	0	0	0	0	0	1	0	0	0	0	0	0	0	0	0	0		1
EIF3M	0	0	0	0	0	1	0	0	0	0	0	0	0	0	0	0		1
TDRD1	1	0	0	0	0	0	0	0	0	0	0	0	0	0	0	0		1
USP47	0	0	0	0	0	0	0	0	0	0	0	0	0	1	0	0		1
C17orf70	1	0	0	0	0	0	0	0	0	0	0	0	0	0	0	0		1
UBE1L	0	0	1	0	0	0	0	0	0	0	0	0	0	0	0	0		1
TTC14	0	0	0	0	0	0	0	0	0	0	0	0	0	1	0	0		1
UBAP2L	1	0	0	0	0	0	0	0	0	0	0	0	0	0	0	0		1
PCCA	1	0	0	0	0	0	0	0	0	0	0	0	0	0	0	0		1
CYP2A7	1	0	0	0	0	0	0	0	0	0	0	0	0	0	0	0		1
PSPC1	0	0	0	0	0	1	0	0	0	0	0	0	0	0	0	0		1
USP30	0	0	0	0	0	0	0	0	0	0	0	0	0	1	0	0		1
UST	0	0	0	0	0	1	0	0	0	0	0	0	0	0	0	0		1
OAZ2	0	0	0	0	0	0	0	0	0	0	0	1	0	0	0	0		1
STXBP2	0	0	0	0	0	0	0	1	0	0	0	0	0	0	0	0		1
SUMO3	0	0	0	0	0	0	0	0	0	0	0	1	0	0	0	0		1
MTHFD2	1	0	0	0	0	0	0	0	0	0	0	0	0	0	0	0		1
ZNF671	0	0	0	0	0	0	0	0	0	0	0	0	0	0	0	1		1
LRRC6	0	0	0	0	0	0	0	1	0	0	0	0	0	0	0	0		1
IDH3G	0	0	0	0	0	1	0	0	0	0	0	0	0	0	0	0		1
N-PAC	1	0	0	0	0	0	0	0	0	0	0	0	0	0	0	0		1
LOC152485	0	0	0	0	0	0	0	0	0	0	1	0	0	0	0	0		1
TBC1D2B	0	0	0	0	0	1	0	0	0	0	0	0	0	0	0	0		1
STXBP1	0	0	0	0	0	1	0	0	0	0	0	0	0	0	0	0		1
THRB	0	0	0	0	0	0	0	0	0	0	1	0	0	0	0	0		1
C11orf71	0	0	0	0	0	1	0	0	0	0	0	0	0	0	0	0		1
ZMYM4	0	0	0	0	0	0	0	0	0	0	0	1	0	0	0	0		1
FXR1	0	0	0	0	0	1	0	0	0	0	0	0	0	0	0	0		1
TFPI	0	0	0	0	0	1	0	0	0	0	0	0	0	0	0	0		1
SYBL1	0	0	0	0	0	1	0	0	0	0	0	0	0	0	0	0		1
PMM2	1	0	0	0	0	0	0	0	0	0	0	0	0	0	0	0		1
CROCC	0	0	0	0	0	0	0	0	0	0	0	0	0	0	1	0		1
EIF4A2	0	0	0	0	0	1	0	0	0	0	0	0	0	0	0	0		1
IQSEC1	1	0	0	0	0	0	0	0	0	0	0	0	0	0	0	0		1
PAPOLA	1	0	0	0	0	0	0	0	0	0	0	0	0	0	0	0		1
EME2	0	0	0	0	0	0	0	0	0	0	1	0	0	0	0	0		1
EIF3EIP	0	0	0	0	0	1	0	0	0	0	0	0	0	0	0	0		1
TBC1D2	0	0	0	0	0	1	0	0	0	0	0	0	0	0	0	0		1
TAOK2	1	0	0	0	0	0	0	0	0	0	0	0	0	0	0	0		1
TAF3	0	0	0	0	0	0	0	0	0	0	0	0	0	1	0	0		1
TRO	0	0	0	0	0	0	0	0	0	0	0	1	0	0	0	0		1
TRIM34	0	0	0	0	0	0	0	0	0	1	0	0	0	0	0	0		1
CCDC53	0	0	0	0	0	1	0	0	0	0	0	0	0	0	0	0		1
MYCL2	1	0	0	0	0	0	0	0	0	0	0	0	0	0	0	0		1
TRIB2	0	0	0	0	0	1	0	0	0	0	0	0	0	0	0	0		1
GGCX	1	0	0	0	0	0	0	0	0	0	0	0	0	0	0	0		1
TAF10	0	0	0	0	0	1	0	0	0	0	0	0	0	0	0	0		1
ALDH9A1	0	0	0	0	0	0	0	0	0	0	0	1	0	0	0	0		1
TARS2	1	0	0	0	0	0	0	0	0	0	0	0	0	0	0	0		1
TARBP2	0	0	0	0	0	0	0	0	0	1	0	0	0	0	0	0		1
PRDX2	1	0	0	0	0	0	0	0	0	0	0	0	0	0	0	0		1
TACSTD1	1	0	0	0	0	0	0	0	0	0	0	0	0	0	0	0		1
TBC1D13	0	0	0	0	0	1	0	0	0	0	0	0	0	0	0	0		1
LSDP5	0	0	0	0	0	0	0	0	0	0	0	0	0	1	0	0		1
THUMPD1	1	0	0	0	0	0	0	0	0	0	0	0	0	0	0	0		1
NAGK	0	0	0	0	0	0	0	0	0	0	0	1	0	0	0	0		1
HISPPD1	0	0	0	0	0	0	0	0	0	0	0	0	0	0	0	1		1
CRTAP	0	0	0	0	0	1	0	0	0	0	0	0	0	0	0	0		1
ZFHX3	0	0	0	0	0	0	0	0	0	0	1	0	0	0	0	0		1
GABARAP	0	0	0	0	0	1	0	0	0	0	0	0	0	0	0	0		1
TESK2	1	0	0	0	0	0	0	0	0	0	0	0	0	0	0	0		1
TENC1	0	0	0	0	0	0	0	0	0	0	0	1	0	0	0	0		1
COASY	0	0	0	0	0	0	0	0	0	0	0	0	0	0	0	1		1
TDG	1	0	0	0	0	0	0	0	0	0	0	0	0	0	0	0		1
ZNF33B	0	0	0	0	0	1	0	0	0	0	0	0	0	0	0	0		1
ZNF187	0	0	0	0	0	0	0	0	0	0	0	1	0	0	0	0		1
SFRS1	1	0	0	0	0	0	0	0	0	0	0	0	0	0	0	0		1
ZNF14	1	0	0	0	0	0	0	0	0	0	0	0	0	0	0	0		1
SPIN2B	0	0	0	0	0	1	0	0	0	0	0	0	0	0	0	0		1
ZNF193	0	0	0	0	0	0	0	0	0	0	0	0	0	0	0	1		1
ASGR2	1	0	0	0	0	0	0	0	0	0	0	0	0	0	0	0		1
C12orf41	1	0	0	0	0	0	0	0	0	0	0	0	0	0	0	0		1
ZNF695	1	0	0	0	0	0	0	0	0	0	0	0	0	0	0	0		1
SFRS7	0	0	1	0	0	0	0	0	0	0	0	0	0	0	0	0		1
LIN7B	1	0	0	0	0	0	0	0	0	0	0	0	0	0	0	0		1
MKRN1	0	0	0	0	0	1	0	0	0	0	0	0	0	0	0	0		1
CAMSAP1L1	0	0	0	0	0	0	0	0	0	0	0	1	0	0	0	0		1
TK2	0	0	0	0	0	0	0	0	0	0	0	0	0	0	0	1		1
WDR32	0	0	0	0	0	0	0	1	0	0	0	0	0	0	0	0		1
TIMM17A	1	0	0	0	0	0	0	0	0	0	0	0	0	0	0	0		1
TIA1	0	0	1	0	0	0	0	0	0	0	0	0	0	0	0	0		1
RAB3D	1	0	0	0	0	0	0	0	0	0	0	0	0	0	0	0		1
TH	1	0	0	0	0	0	0	0	0	0	0	0	0	0	0	0		1
TJP2	0	0	0	0	0	1	0	0	0	0	0	0	0	0	0	0		1
ZNF395	0	0	0	0	0	0	1	0	0	0	0	0	0	0	0	0		1
PSENEN	0	0	0	0	0	0	0	1	0	0	0	0	0	0	0	0		1
SIL1	0	0	0	0	0	0	0	0	0	0	0	0	0	0	0	1		1
TBK1	1	0	0	0	0	0	0	0	0	0	0	0	0	0	0	0		1
CPB1	0	0	0	0	0	0	0	0	0	0	0	0	0	0	0	1		1
RAC3	1	0	0	0	0	0	0	0	0	0	0	0	0	0	0	0		1
TBC1D9B	0	0	0	0	0	0	0	1	0	0	0	0	0	0	0	0		1
MED16	1	0	0	0	0	0	0	0	0	0	0	0	0	0	0	0		1
TIMELESS	1	0	0	0	0	0	0	0	0	0	0	0	0	0	0	0		1
ZNF107	1	0	0	0	0	0	0	0	0	0	0	0	0	0	0	0		1
TCEAL3	0	0	0	0	0	0	0	0	0	0	0	0	0	1	0	0		1
TCF7L1	0	0	0	0	0	1	0	0	0	0	0	0	0	0	0	0		1
BAG3	0	0	0	0	0	1	0	0	0	0	0	0	0	0	0	0		1
NACA2	0	0	0	0	0	1	0	0	0	0	0	0	0	0	0	0		1
CAST	0	0	0	0	0	0	0	0	0	0	0	0	0	0	0	1		1
PMF1	0	0	0	0	0	0	0	0	0	0	0	1	0	0	0	0		1
PMS2L2	1	0	0	0	0	0	0	0	0	0	0	0	0	0	0	0		1
PCGF3	1	0	0	0	0	0	0	0	0	0	0	0	0	0	0	0		1
DUS1L	1	0	0	0	0	0	0	0	0	0	0	0	0	0	0	0		1
MYO15B	0	0	1	0	0	0	0	0	0	0	0	0	0	0	0	0		1
MYO1B	0	0	0	0	0	1	0	0	0	0	0	0	0	0	0	0		1
TMEM84	0	0	0	0	0	0	0	0	0	0	0	0	0	1	0	0		1
NDUFA4	0	0	0	0	0	1	0	0	0	0	0	0	0	0	0	0		1
RALB	0	0	0	0	0	0	0	0	0	1	0	0	0	0	0	0		1
POM121L1	0	0	1	0	0	0	0	0	0	0	0	0	0	0	0	0		1
PNMT	1	0	0	0	0	0	0	0	0	0	0	0	0	0	0	0		1
CHKB	0	0	1	0	0	0	0	0	0	0	0	0	0	0	0	0		1
PXN	0	0	0	0	0	0	0	0	0	0	1	0	0	0	0	0		1
PLXNB2	0	0	1	0	0	0	0	0	0	0	0	0	0	0	0	0		1
HMGCS2	0	0	0	0	0	0	0	0	0	1	0	0	0	0	0	0		1
CCDC24	0	0	0	0	0	0	0	0	0	0	0	0	0	1	0	0		1
PLEKHH3	1	0	0	0	0	0	0	0	0	0	0	0	0	0	0	0		1
NDUFB1	1	0	0	0	0	0	0	0	0	0	0	0	0	0	0	0		1
NDUFB4	1	0	0	0	0	0	0	0	0	0	0	0	0	0	0	0		1
ARHGEF10L	0	0	0	0	0	1	0	0	0	0	0	0	0	0	0	0		1
MTX1	1	0	0	0	0	0	0	0	0	0	0	0	0	0	0	0		1
ASPH	0	0	0	0	0	0	0	0	0	1	0	0	0	0	0	0		1
TMEM106C	1	0	0	0	0	0	0	0	0	0	0	0	0	0	0	0		1
CYB5D2	0	0	0	0	0	0	0	0	0	0	0	0	0	1	0	0		1
BTD	0	0	0	0	0	0	0	1	0	0	0	0	0	0	0	0		1
NDUFA3	1	0	0	0	0	0	0	0	0	0	0	0	0	0	0	0		1
NDUFB5	0	0	0	0	0	1	0	0	0	0	0	0	0	0	0	0		1
P2RY6	0	0	0	0	0	1	0	0	0	0	0	0	0	0	0	0		1
FA2H	1	0	0	0	0	0	0	0	0	0	0	0	0	0	0	0		1
ATP8B2	0	0	0	0	0	1	0	0	0	0	0	0	0	0	0	0		1
MBTPS1	1	0	0	0	0	0	0	0	0	0	0	0	0	0	0	0		1
MUT	0	0	0	0	0	1	0	0	0	0	0	0	0	0	0	0		1
MVK	1	0	0	0	0	0	0	0	0	0	0	0	0	0	0	0		1
VPS13C	0	0	0	0	0	0	0	0	0	0	1	0	0	0	0	0		1
NDUFA13	0	0	0	0	0	0	0	1	0	0	0	0	0	0	0	0		1
TTLL5	0	0	1	0	0	0	0	0	0	0	0	0	0	0	0	0		1
MYH11	0	0	1	0	0	0	0	0	0	0	0	0	0	0	0	0		1
MXI1	0	0	0	0	0	1	0	0	0	0	0	0	0	0	0	0		1
PRDM4	0	0	0	0	0	0	0	0	0	1	0	0	0	0	0	0		1
PRKD2	1	0	0	0	0	0	0	0	0	0	0	0	0	0	0	0		1
PPID	0	0	0	0	0	0	0	0	0	0	0	0	0	1	0	0		1
SLC11A2	1	0	0	0	0	0	0	0	0	0	0	0	0	0	0	0		1
PPCS	0	0	0	0	0	1	0	0	0	0	0	0	0	0	0	0		1
RPRM	0	0	0	0	0	1	0	0	0	0	0	0	0	0	0	0		1
METTL3	0	0	1	0	0	0	0	0	0	0	0	0	0	0	0	0		1
[truncated: 946 more rows]
